# Supplementary material
Source: PubMed Central journal article supplement (PMC5672916)
Supplement: NIHMS915245-supplement-Supporting_Information.pdf [file NIHMS915245-supplement-Supporting_Information.pdf]

## Table of Contents

|                                                                                                                        |            |
|------------------------------------------------------------------------------------------------------------------------|------------|
| <b>General Information</b> .....                                                                                       | <b>2</b>   |
| <b>Optimization of Conditions</b> .....                                                                                | <b>3</b>   |
| <b>Experimental Section</b> .....                                                                                      | <b>7</b>   |
| <b>General Procedure for the Rhodium Catalyzed Atom Transfer Radical Addition Reactions</b> ..                         | <b>7</b>   |
| <b>Derivatization of Secondary Bromide 1a</b> .....                                                                    | <b>19</b>  |
| <b>Mechanistic Experiments</b> .....                                                                                   | <b>21</b>  |
| <b>Synthesis of DIOPs</b> .....                                                                                        | <b>25</b>  |
| <b>Computational Studies</b> .....                                                                                     | <b>30</b>  |
| <b>Computational Methods</b> .....                                                                                     | <b>30</b>  |
| <b>Computational Analysis on Factors that Favor the Radical Mechanism over the Closed-Shell Pathways</b> .....         | <b>31</b>  |
| <b>Chain-Transfer versus Bromine Atom Transfer Pathways from (DIOP)Rh(II)ClBr</b> .....                                | <b>32</b>  |
| <b>Conformational Search for the Enantioselectivity-Determining Br Atom Abstraction Transition State (17-TS)</b> ..... | <b>33</b>  |
| <b>Cartesian Coordinates of Optimized Structures</b> .....                                                             | <b>35</b>  |
| <b>NMR Spectra</b> .....                                                                                               | <b>88</b>  |
| <b>References</b> .....                                                                                                | <b>140</b> |

### General information

Unless otherwise stated, reactions were performed under argon using freshly purified solvents which were purified using solvent purification columns purchased from Glass Contour, Laguna Beach, CA. All reactions were monitored by thin-layer chromatography with E. Merck silica gel 60 F254 pre-coated plates (0.25 mm). Flash chromatography was performed with indicated solvents using silica gel (particle size 0.032-0.063m) purchased from Sorbent Technologies.  $^1\text{H}$  and  $^{13}\text{C}$  NMR spectra were recorded on Varian MR or Inova 400 MHz spectrometer. Data for  $^1\text{H}$  NMR are reported as follows: chemical shift (ppm), integration, multiplicity (s = singlet, d = doublet, t = triplet, q = quartet, p = pentet, bs = broad singlet, and m = multiplet), and coupling constant (Hz). The residual solvent peak was used as an internal reference: proton (chloroform  $\delta$  7.26), carbon (chloroform  $\delta$  77.0) or tetramethylsilane (TMS  $\delta$  0.00) was used as a reference. Mass spectra were acquired on an Agilent technologies 7820A GC-5975 MSD series GC/MS using EI ionization methods. The enantiomeric ratio (**er**) of products were determined by chiral phase HPLC analysis on SHIMAZU HPLC units, including the following instruments: pump, LC-20AD; detector, SPD-20A; column, Chiralcel OJ-H or OD-H. Optical rotations were recorded on an AP IV-6W automatic polarimeter.

Chemicals such as (-)-DIOP and styrenes were purchased from Aldrich, Fisher or Alfa Aesar and used without purification unless otherwise noted.  $[\text{Rh}(\text{COD})\text{Cl}]_2$  was purchased from Acros Organics and used as received.  $\text{BrCCl}_3$  was purchased from Aldrich and used as received.

**Table S1. Optimization of conditions<sup>a</sup>**

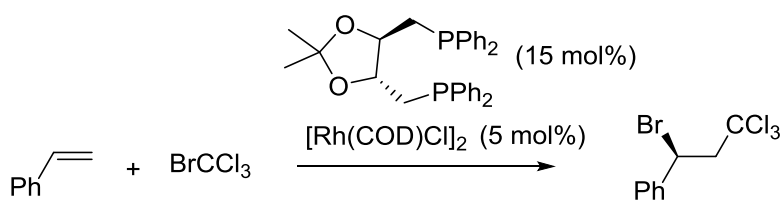

| Entry          | Temp (°C) | Concentration | Solvent                        | Additive (equiv)         | Yield (%) <sup>b</sup> | Ee (%) <sup>c</sup> |
|----------------|-----------|---------------|--------------------------------|--------------------------|------------------------|---------------------|
| 1              | 25        | 0.1           | toluene                        | none                     | >95                    | 35                  |
| 2              | 0         | 0.1           | toluene                        | none                     | 88                     | 42                  |
| 3              | -10       | 0.1           | toluene                        | none                     | 80                     | 52                  |
| 4              | -40       | 0.1           | toluene                        | none                     | 75                     | 71                  |
| 5              | -78       | 0.1           | toluene                        | none                     | 69                     | 78                  |
| 6 <sup>a</sup> | -78       | 0.1           | toluene                        | none                     | >95                    | 78                  |
| 7              | -78       | 0.05          | toluene                        | none                     | 87                     | 75                  |
| 8              | -78       | 0.2           | toluene                        | none                     | 58                     | 77.6                |
| 9              | -78       | 1             | toluene                        | none                     | 60                     | 73                  |
| 10             | -78       | 2             | toluene                        | none                     | 61                     | 62                  |
| 11             | -78       | 0.1           | Hexanes                        | none                     | 0                      | NR                  |
| 12             | -78       | 0.1           | THF                            | none                     | 36                     | 66                  |
| 13             | -78       | 0.1           | DCM                            | none                     | 24                     | 49                  |
| 14             | -40       | 0.1           | MeCN                           | none                     | >95                    | 28                  |
| 15             | -78       | 0.1           | Et <sub>2</sub> O              | none                     | 11                     | 78                  |
| 16             | -78       | 0.1           | Acetone                        | none                     | 6                      | 44                  |
| 17             | -78       | 0.1           | tBuOMe                         | none                     | 25                     | 69                  |
| 18             | -78       | 0.1           | EtOH                           | none                     | >95                    | 7                   |
| 19             | -78       | 0.1           | EtOAc                          | none                     | 30                     | 65                  |
| 20             | -25       | 0.1           | PhCF <sub>3</sub>              | none                     | 38                     | 30                  |
| 21             | -78       | 0.1           | PhEt                           | none                     | 0                      | NR                  |
| 22             | -78       | 0.1           | EtCN                           | none                     | 11                     | 5                   |
| 23             | -78       | 0.1           | PhCF <sub>3</sub> /PhMe<br>1/4 | none                     | 60                     | 74                  |
| 24             | -78       | 0.1           | toluene                        | PhSMe (0.1)              | 51                     | 78                  |
| 25             | -78       | 0.1           | toluene                        | PhOH (0.1)               | 83                     | 78                  |
| 26             | -78       | 0.1           | toluene                        | PhNH <sub>2</sub> (0.1)  | 46                     | 78                  |
| 27             | -78       | 0.1           | toluene                        | H <sub>2</sub> O (1)     | 93                     | 75                  |
| 28             | -78       | 0.1           | toluene                        | <sup>t</sup> BuLi (0.1)  | >95                    | 71                  |
| 29             | -78       | 0.1           | toluene                        | AgF (0.1)                | 44                     | 32                  |
| 30             | -78       | 0.1           | toluene                        | AgOTf (0.1)              | 0                      | NA                  |
| 31             | -78       | 0.1           | toluene                        | AgBF <sub>4</sub> (0.1)  | 20                     | 77                  |
| 32             | -78       | 0.1           | toluene                        | AgSbF <sub>6</sub> (0.1) | 27                     | 67                  |
| 33             | -78       | 0.1           | toluene                        | AgClO <sub>4</sub> (0.1) | 0                      | NA                  |

<sup>a</sup> reaction time 12 h. <sup>b</sup>Yield by <sup>1</sup>H NMR. <sup>c</sup>Er by HPLC.

**Figure S1. Ligand evaluation**

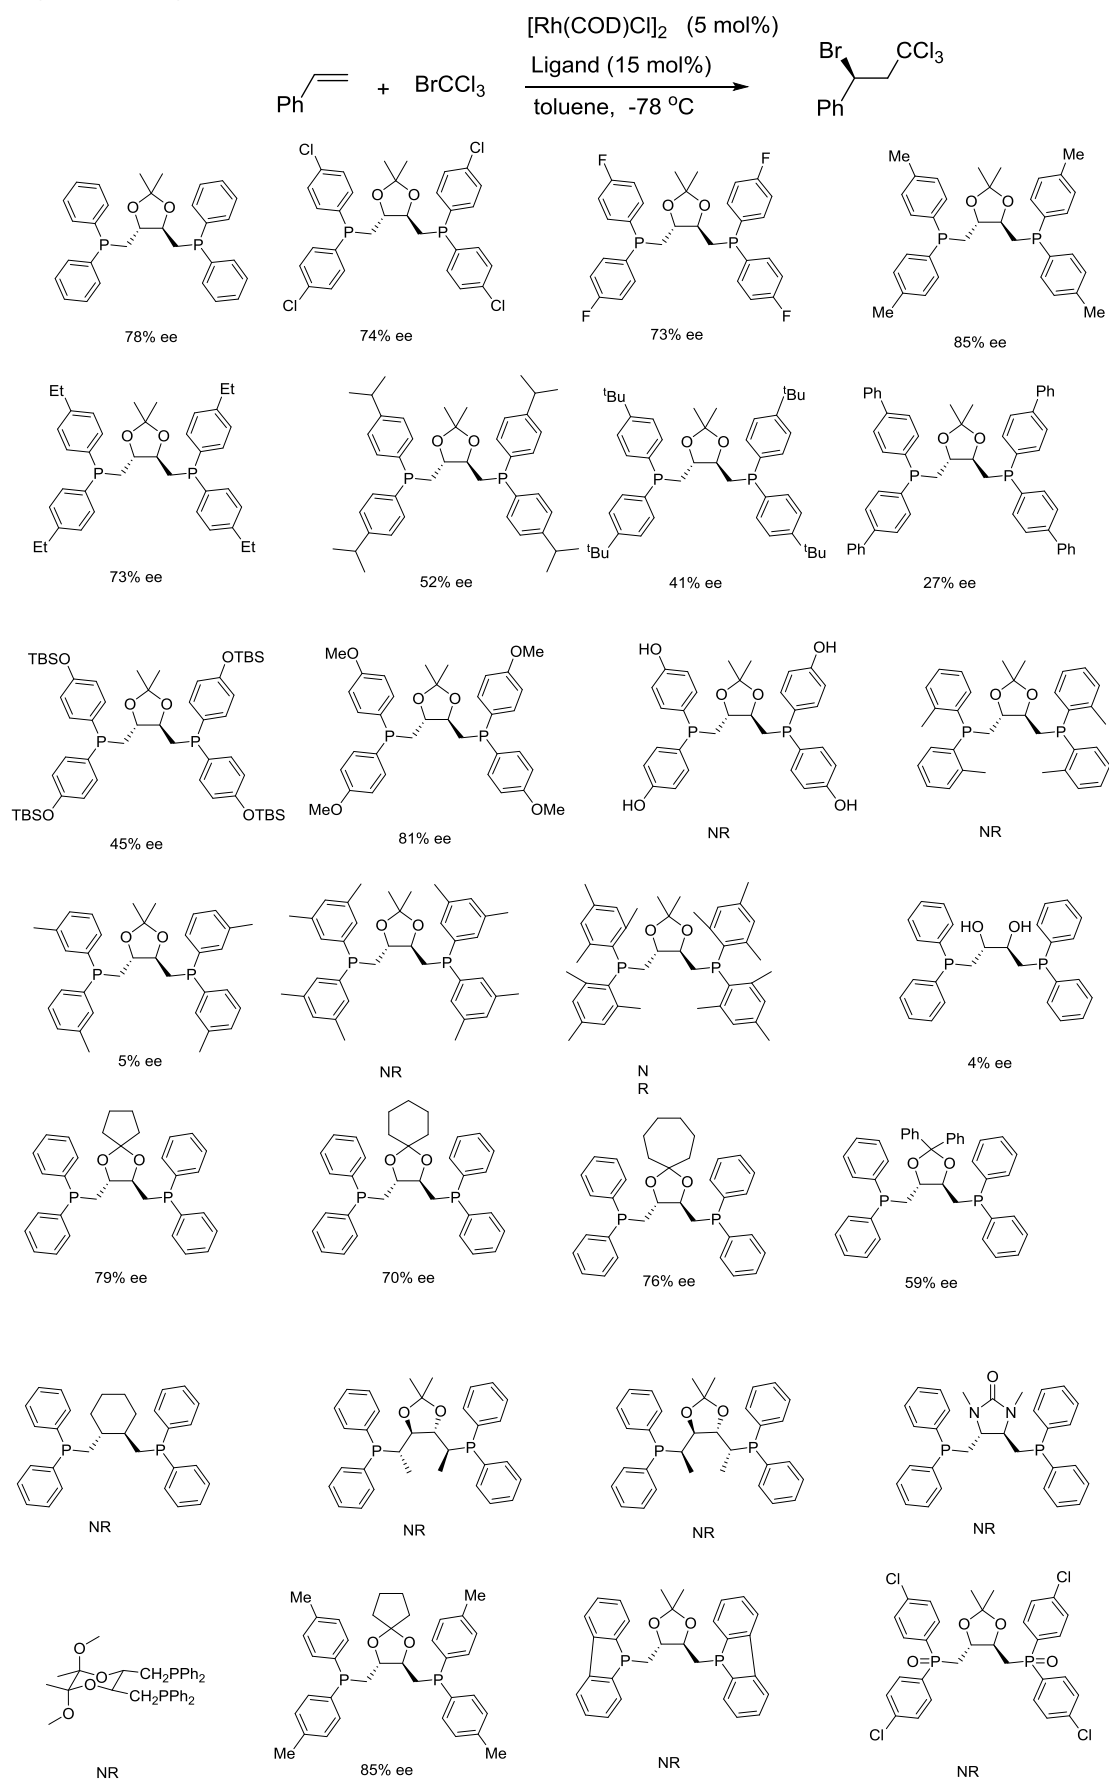

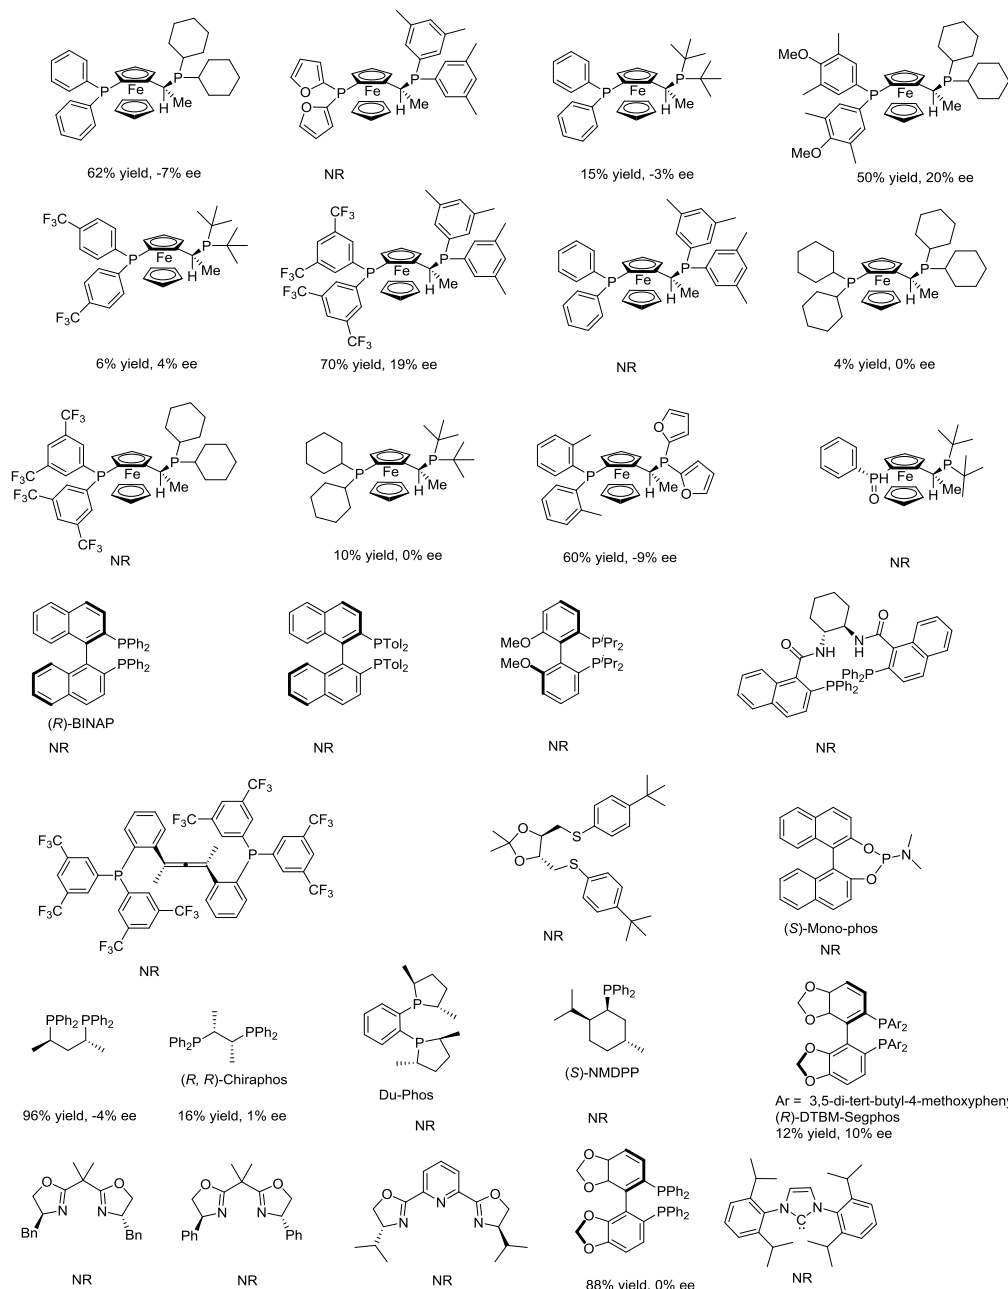

## Other metal catalysts

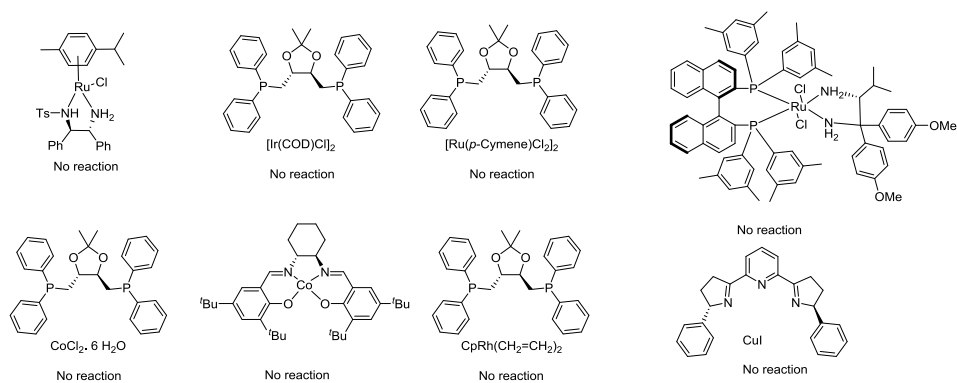

**Figure S2. Alternative Rh Sources.**

[Rh(Olefin)Cl]<sub>2</sub>

|       |                                                                                   |                                                                                   |                                                                                   |                                                                                    |                                                                                     |
|-------|-----------------------------------------------------------------------------------|-----------------------------------------------------------------------------------|-----------------------------------------------------------------------------------|------------------------------------------------------------------------------------|-------------------------------------------------------------------------------------|
|       |  |  |  |  |  |
| ee    | 78%                                                                               | 65%                                                                               |                                                                                   | 75%                                                                                | 78%                                                                                 |
| yield | >95%                                                                              | >95%                                                                              | NR                                                                                | 48%                                                                                | 45%                                                                                 |

[Rh(COD)X]<sub>2</sub>

|       |      |      |      |     |                                                                                    |
|-------|------|------|------|-----|------------------------------------------------------------------------------------|
| X =   | Cl   | OH   | OMe  | F   | 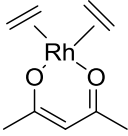 |
| ee    | 78%  | 14%  | 40%  | 32% | no reaction                                                                        |
| yield | >95% | >95% | >95% | 44% |                                                                                    |

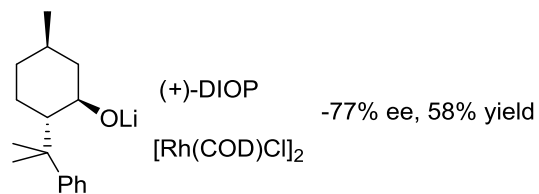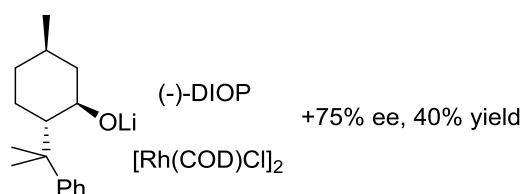

## General Procedure for the rhodium catalyzed atom transfer radical addition reactions

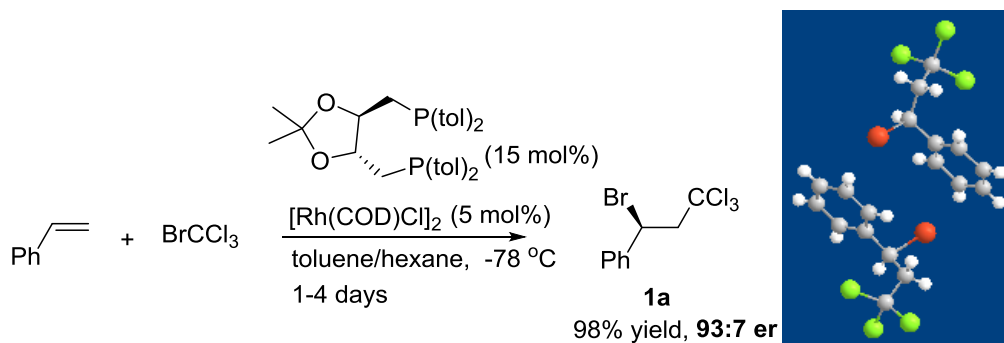

**(S)-(1-bromo-3,3,3-trichloropropyl)benzene (1a)** (Literature data of +/- **1a**<sup>1</sup>): [Rh(COD)Cl]<sub>2</sub> (6.2 mg, 0.0125 mmol), (-)-tol-DIOP (20.8 mg, 0.0375 mmol), toluene (1.0 mL), and hexane (1 mL) were added to a dried vial under an argon atmosphere. The reaction mixture was stirred for 20 min at RT and then cooled to -78 °C. A solution of styrene (0.25 mmol, 26 mg, 0.03 mL, d = 0.926 g/mL) and BrCCl<sub>3</sub> (0.5 mmol, 99.1 mg, 0.05 mL, d = 2.01 g/mL) in toluene/hexane (1:1 ratio total 0.5 mL) was added slowly by a syringe over 10 min. The reaction was vigorously stirred at -78 °C for 1-4 days (monitored by TLC). Cold hexanes (5 mL, cooled in dry ice/acetone bath) were added to dilute the reaction and precipitate the catalyst, and the mixture was filtered quickly through a short pad of silica gel. The filtrate was collected, and concentrated under vacuum to afford pure product (colorless oil, 74 mg, 98%) (The product solidified after standing in the freezer overnight)

TLC R<sub>f</sub> = 0.7 (Hexanes)

<sup>1</sup>H NMR (400 MHz, CDCl<sub>3</sub>) δ 7.49 – 7.43 (m, 1H), 7.40 – 7.28 (m, 2H), 5.39 (t, *J* = 6.2 Hz, 1H), 3.77 (s, 1H), 3.75 (d, *J* = 0.8 Hz, 1 H).

<sup>13</sup>C NMR (101 MHz, CDCl<sub>3</sub>) δ 140.7, 128.9, 128.8, 127.8, 96.5, 62.6, 47.5.

EI MS [C<sub>9</sub>H<sub>8</sub>BrCl<sub>3</sub>, M-Br]<sup>+</sup>: 221.0

**Optical Rotation:** [α]<sub>D</sub><sup>25</sup> :-98.8 (c = 1.0, CHCl<sub>3</sub>)

The absolute configuration was assigned by the X-ray crystallography. Qualified single crystal could be obtained by dissolving the solid in hot hexanes and then allowing the solution to cool in a -20 °C refrigerator. The ee of mother solution was higher than that of the crystals, so we collected the mother solution (ca. **97:3 er**) and added the major enantiomer into the mother liquor as a seed to obtain the final crystals. Two separate crystals were analyzed, and they gave the same result. The crystals were a dimer (*S,S*) as shown in the above picture. (**CCDC 1529778**)

**93:7 er** HPLC condition: Daicel Chiralpak OJ-H column (25 cm \*0.46 cm ID: OJH0CE-EL020), conditions: hexanes, flow rate = 0.5 mL/min, wavelength = 254 nm; t<sub>R</sub> (minor) = 17.1 min and t<sub>R</sub> (major) = 21.4 min.

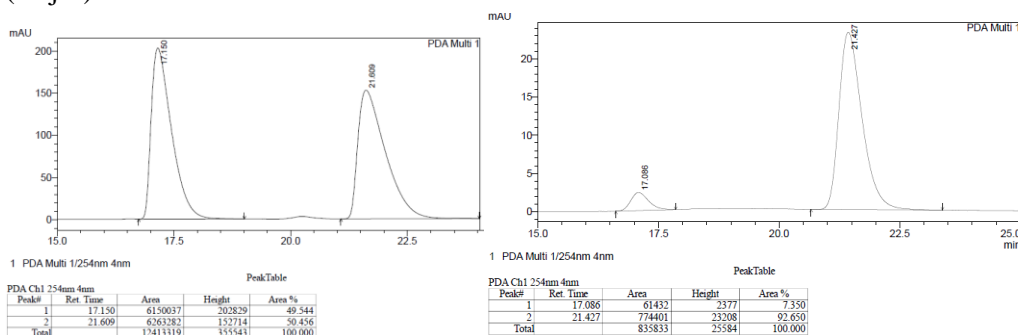

**(S)-1-(1-bromo-3,3,3-trichloropropyl)-2-methylbenzene (1b)**

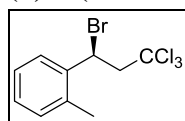

oil, 62% yield

TLC  $R_f$  = 0.7 (Hexanes)

$^1\text{H NMR}$  (400 MHz,  $\text{CDCl}_3$ )  $\delta$  7.54 – 7.47 (m, 1H), 7.30 – 7.11 (m, 3H), 5.66 (dd,  $J$  = 7.5, 4.6 Hz, 1H), 3.90 – 3.73 (m, 2H), 2.46 (s, 3H).

$^{13}\text{C NMR}$  (101 MHz,  $\text{CDCl}_3$ )  $\delta$  130.9, 128.7, 127.9, 126.9, 96.7, 62.2, 19.4.

**Optical Rotation:**  $[\alpha]_D^{25}$ : -26.8 ( $c$  = 0.5,  $\text{CHCl}_3$ ) The absolute configuration was assigned by analogy to **1a**.

**EI MS**  $m/z$ :  $[\text{M}-\text{Br}]^+$  235.0

**92:8 er HPLC** condition: Daicel Chiralpak OJ-H column, conditions: hexanes/*i*-PrOH = 95/5, flow rate = 0.5 mL/min, wavelength = 254 nm;  $t_R$  (minor) = 9.1 min and  $t_R$  (major) = 9.5 min.

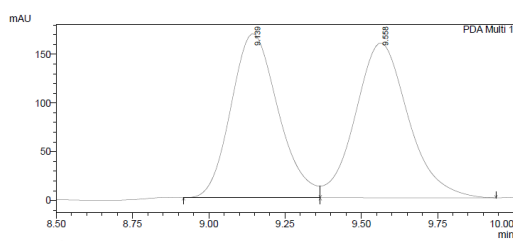

| Peak# | Ret. Time | Area    | Height | Area %  |
|-------|-----------|---------|--------|---------|
| 1     | 9.139     | 1812288 | 168309 | 48.707  |
| 2     | 9.558     | 1908538 | 158741 | 51.293  |
| Total |           | 3720826 | 327050 | 100.000 |

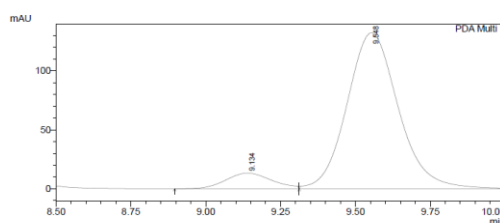

| Peak# | Ret. Time | Area    | Height | Area %  |
|-------|-----------|---------|--------|---------|
| 1     | 9.134     | 141775  | 13245  | 8.218   |
| 2     | 9.548     | 1583467 | 132204 | 91.782  |
| Total |           | 1725242 | 145549 | 100.000 |

**(S)-1-(1-bromo-3,3,3-trichloropropyl)-3-methylbenzene (1c)**

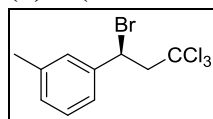

colorless oil, 90% yield

TLC  $R_f$  = 0.7 (Hexanes)

$^1\text{H NMR}$  (400 MHz,  $\text{CDCl}_3$ )  $\delta$  7.29 – 7.20 (m, 3H), 7.14 – 7.08 (m, 1H), 5.34 (t,  $J$  = 6.2 Hz, 1H), 3.74 (d,  $J$  = 6.2 Hz, 2H), 2.36 (s, 3H).

$^{13}\text{C NMR}$  (101 MHz,  $\text{CDCl}_3$ )  $\delta$  140.7, 138.6, 129.7, 128.7, 128.4, 124.8, 96.5, 62.6, 47.7, 21.4.

**Optical Rotation:**  $[\alpha]_D^{24}$ : -88.6 ( $c$  = 1.0,  $\text{CHCl}_3$ ) The absolute configuration was assigned by analogy to **1a**.

**EI MS**  $m/z$ :  $[\text{M}-\text{Br}]^+$  235.0

**90:10 er HPLC** condition: Daicel Chiralpak OJ-H column, conditions: hexanes, flow rate = 0.5 mL/min, wavelength = 254 nm;  $t_R$  (minor) = 14.5 min and  $t_R$  (major) = 17.3 min.

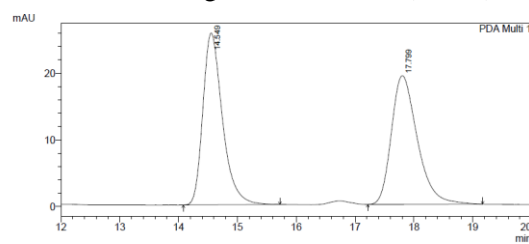

| Peak# | Ret. Time | Area    | Height | Area %  |
|-------|-----------|---------|--------|---------|
| 1     | 14.549    | 596188  | 25750  | 50.219  |
| 2     | 17.799    | 909983  | 19299  | 49.781  |
| Total |           | 1187171 | 45049  | 100.000 |

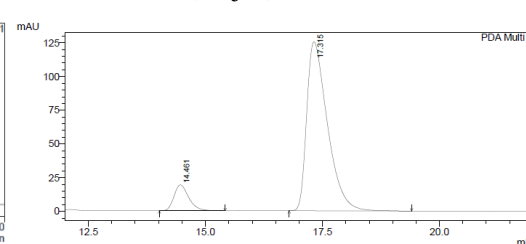

| Peak# | Ret. Time | Area    | Height | Area %  |
|-------|-----------|---------|--------|---------|
| 1     | 14.461    | 421094  | 19196  | 9.847   |
| 2     | 17.315    | 385447  | 125398 | 90.153  |
| Total |           | 4276540 | 144594 | 100.000 |

**(S)-1-(1-bromo-3,3,3-trichloropropyl)-4-methylbenzene (1d)** (Literature data of +/- **1d**<sup>2</sup>)

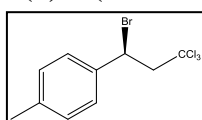



White solid, 64% yield

TLC  $R_f = 0.7$  (Hexanes)

$^1\text{H NMR}$  (400 MHz,  $\text{CDCl}_3$ )  $\delta$  7.34 (d,  $J = 8.3$  Hz, 1H), 7.16 (d,  $J = 7.8$  Hz, 2H), 5.37 (t,  $J = 6.2$  Hz, 1H), 3.74 (d,  $J = 6.2$  Hz, 2H), 2.35 (s, 3H).

$^{13}\text{C NMR}$  (101 MHz,  $\text{CDCl}_3$ )  $\delta$  138.9, 137.8, 129.5, 127.7, 96.5, 62.6, 47.7, 21.2.

**Optical Rotation:**  $[\alpha]_D^{25} : -97.1$  ( $c = 1.0$ ,  $\text{CHCl}_3$ ) The absolute configuration was assigned by analogy to **1a**.

**EI MS**  $m/z$ :  $[\text{M}-\text{Br}]^+ 235.0$

**95:5 er** HPLC condition: Daicel Chiralpak OJ-H column (25 cm \*0.46 cm ID: OJH0CE-EL020), conditions: hexanes, flow rate = 0.5 mL/min, wavelength = 254 nm;  $t_R$  (minor) = 15.9 min and  $t_R$  (major) = 20.0 min.

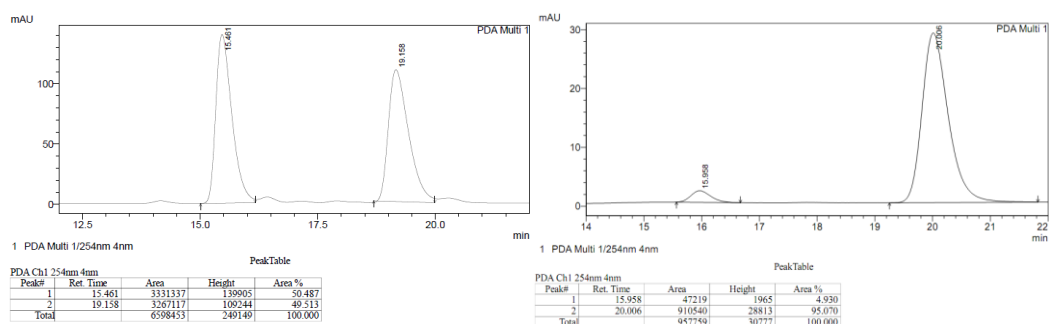

**(S)-1-(1-bromo-3,3,3-trichloropropyl)-3-methoxybenzene (1e)** (Literature data of +/- **1e**)<sup>3</sup>

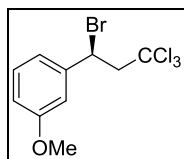

colorless oil, 44% yield

TLC  $R_f = 0.3$  (Hexanes)

$^1\text{H NMR}$  (400 MHz,  $\text{CDCl}_3$ )  $\delta$  7.35 – 7.19 (m, 1H), 7.04 (d,  $J = 7.8$  Hz, 1H), 6.98 (s, 1H), 6.91 – 6.77 (m, 1H), 5.33 (t,  $J = 6.2$  Hz, 1H), 3.83 (s, 3H), 3.73 (d,  $J = 5.9$  Hz, 2H).

$^{13}\text{C NMR}$  (101 MHz,  $\text{CDCl}_3$ )  $\delta$  159.7, 142.2, 129.9, 120.1, 114.2, 113.6, 96.5, 62.6, 55.3, 47.4.

**Optical Rotation:**  $[\alpha]_D^{24} : -83.0$  ( $c = 1.0$ ,  $\text{CHCl}_3$ ) The absolute configuration was assigned by analogy to **1a**.

**EI MS**  $m/z$ :  $[\text{M}]^+ 332.0$

**89:11 er** HPLC condition: Daicel Chiralpak OJ-H column, conditions: hexanes/*i*-PrOH = 90/10, flow rate = 0.5 mL/min, wavelength = 254 nm;  $t_R$  (minor) = 12.2 min and  $t_R$  (major) = 14.0 min.

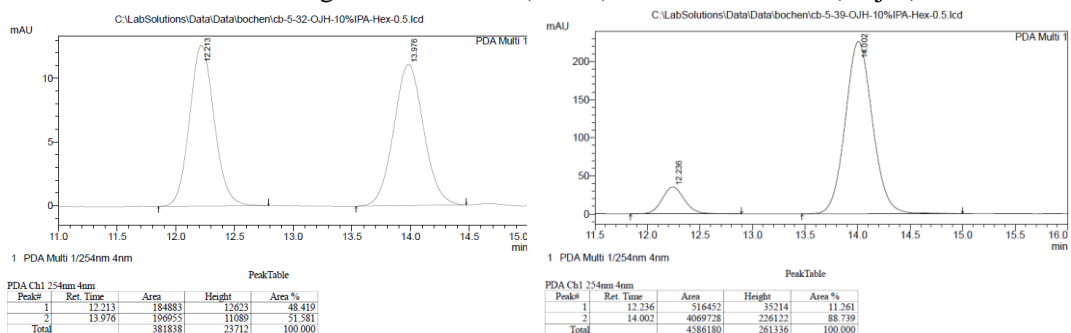

**(S)-1-(1-bromo-3,3,3-trichloropropyl)-3-fluorobenzene (1f)**

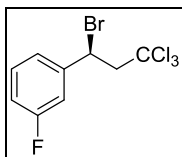

colorless oil, 80% yield.

TLC  $R_f = 0.6$  (Hexanes)

$^1\text{H NMR}$  (400 MHz,  $\text{CDCl}_3$ )  $\delta$  7.33 (td,  $J = 8.0, 5.8$  Hz, 1H), 7.27 – 7.21 (m, 1H), 7.17 (dt,  $J = 9.6, 2.1$  Hz, 1H), 7.01 (td,  $J = 8.3, 1.7$  Hz, 1H), 5.33 (dd,  $J = 7.5, 5.0$  Hz, 1H), 3.79 – 3.61 (m, 2H).

$^{19}\text{F NMR}$  (376 MHz,  $\text{CDCl}_3$ )  $\delta$  -111.8.

$^{13}\text{C NMR}$  (101 MHz,  $\text{CDCl}_3$ )  $\delta$  162.7 (d,  $J = 247.4$  Hz), 143.0 (d,  $J = 7.4$  Hz), 130.4 (d,  $J = 8.3$  Hz), 123.5 (d,  $J = 3.0$  Hz), 116.0 (d,  $J = 21.2$  Hz), 114.9 (d,  $J = 22.5$  Hz), 96.7, 62.5, 46.2 (d,  $J = 2.1$  Hz).

**Optical Rotation:**  $[\alpha]_D^{24}$ : -74.0 ( $c = 1.0$ ,  $\text{CHCl}_3$ ) The absolute configuration was assigned by analogy to **1a**.

**EI MS**  $m/z$ :  $[\text{M}-\text{Br}]^+$  239.0

**91:9 er** HPLC condition: Daicel Chiralpak OD-H column, conditions: hexanes, flow rate = 0.5 mL/min, wavelength = 254 nm;  $t_R$  (minor) = 16.1 min and  $t_R$  (major) = 15.2 min

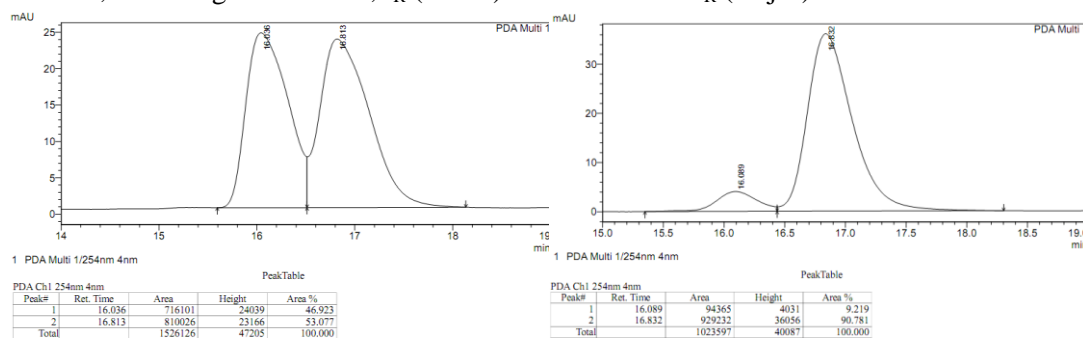

### (S)-1-(1-bromo-3,3,3-trichloropropyl)-4-tert-butylbenzene (**1g**)

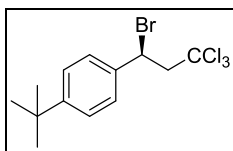

colorless oil, 61% yield

TLC  $R_f = 0.7$  (Hexanes)

$^1\text{H NMR}$  (400 MHz,  $\text{CDCl}_3$ )  $\delta$  7.37 (s, 4H), 5.37 (dd,  $J = 7.1, 5.2$  Hz, 1H), 3.80 – 3.68 (m, 2H), 1.31 (s, 9H).

$^{13}\text{C NMR}$  (101 MHz,  $\text{CDCl}_3$ )  $\delta$  152.1, 137.8, 127.3, 125.8, 96.6, 62.7, 47.6, 34.7, 31.2.

**Optical Rotation:**  $[\alpha]_D^{24}$ : -98.6 ( $c = 1.0$ ,  $\text{CHCl}_3$ ) The absolute configuration was assigned by analogy to **1a**.

**EI MS**  $m/z$ :  $[\text{M}-\text{Br}]^+$  277.1

**94:6 er** HPLC condition: Daicel Chiralpak OD-H column, conditions: hexanes, flow rate = 0.5 mL/min, wavelength = 254 nm;  $t_R$  (major) = 10.1 min and  $t_R$  (minor) = 12.0 min.

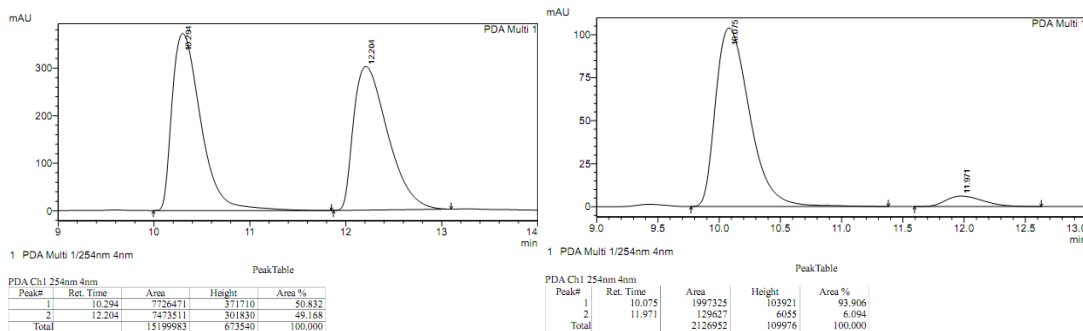

### (S)-1-(1-bromo-3,3,3-trichloropropyl)-4-isopropylbenzene (1h)

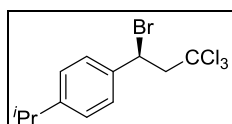

colorless oil, 57% yield.

TLC  $R_f$  = 0.7 (Hexanes)

$^1\text{H}$  NMR (400 MHz,  $\text{CDCl}_3$ )  $\delta$  7.37 (d,  $J$  = 8.2 Hz, 2H), 7.21 (d,  $J$  = 8.2 Hz, 2H), 5.37 (dd,  $J$  = 7.0, 5.3 Hz, 1H), 3.82 – 3.64 (m, 2H), 2.90 (p,  $J$  = 6.9 Hz, 1H), 1.24 (d,  $J$  = 6.9 Hz, 6H).

$^{13}\text{C}$  NMR (101 MHz,  $\text{CDCl}_3$ )  $\delta$  149.8, 138.2, 127.7, 126.9, 96.6, 62.7, 47.7, 33.8, 23.9.

**Optical Rotation:**  $[\alpha]_D^{25}$ : -98.0 ( $c$  = 1.0,  $\text{CHCl}_3$ ) The absolute configuration was assigned by analogy to **1a**.

**EI MS**  $m/z$ :  $[\text{M}-\text{Br}]^+$  263.0

**92:8 er** HPLC condition: Daicel Chiralpak OJ-H column, conditions: hexanes, flow rate = 0.5 mL/min, wavelength = 254 nm;  $t_R$  (minor) = 10.8 min and  $t_R$  (major) = 14.2 min

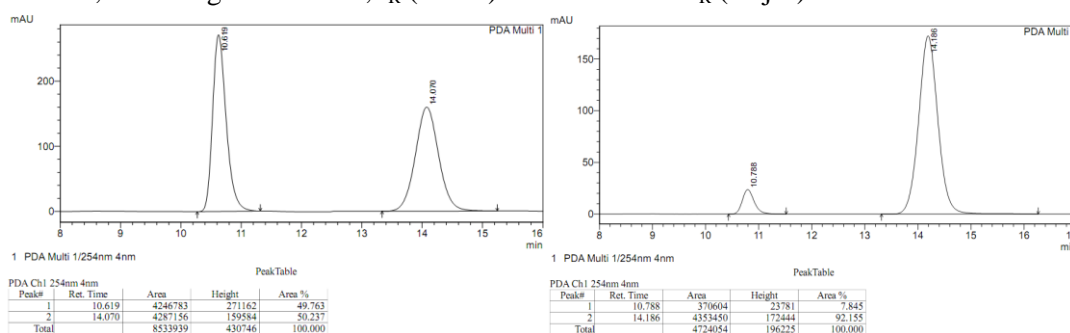

### (S)-4-(1-bromo-3,3,3-trichloropropyl)-1,1'-biphenyl (1i)

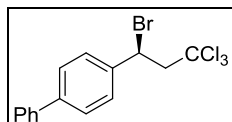

White solid, 78% yield.

TLC  $R_f$  = 0.6 (Hexanes)

To anyone who may be interested, this compound is will racemize on silica gel at room temperature. It is stable on neutral  $\text{Al}_2\text{O}_3$  or silica gel at lower temperature (below  $0^\circ\text{C}$ ).

$^1\text{H}$  NMR (400 MHz,  $\text{CDCl}_3$ )  $\delta$  7.59 (d,  $J$  = 8.6 Hz, 4H), 7.52 (d,  $J$  = 8.4 Hz, 2H), 7.50 – 7.42 (m, 2H), 7.40 – 7.31 (m, 1H), 5.44 (t,  $J$  = 6.3 Hz, 1H), 3.79 (d,  $J$  = 6.3 Hz, 2H).

$^{13}\text{C}$  NMR (101 MHz,  $\text{CDCl}_3$ )  $\delta$  141.8, 140.1, 139.7, 128.8, 128.2, 127.7, 127.5, 127.1, 96.5, 62.5, 47.4.

**Optical Rotation:**  $[\alpha]_D^{25}$ : -60.4 ( $c = 1.0$ ,  $\text{CHCl}_3$ ) The absolute configuration was assigned by analogy to **1a**.

**EI MS**  $m/z$ :  $[\text{M}-\text{Br}]^+$  297.0

**87:13 er** HPLC condition: Daicel Chiralpak OJ-H column, conditions: hexanes/*i*-PrOH = 90/10, flow rate = 0.5 mL/min, wavelength = 254 nm;  $t_R$  (major) = 14.0 min and  $t_R$  (minor) = 15.2 min

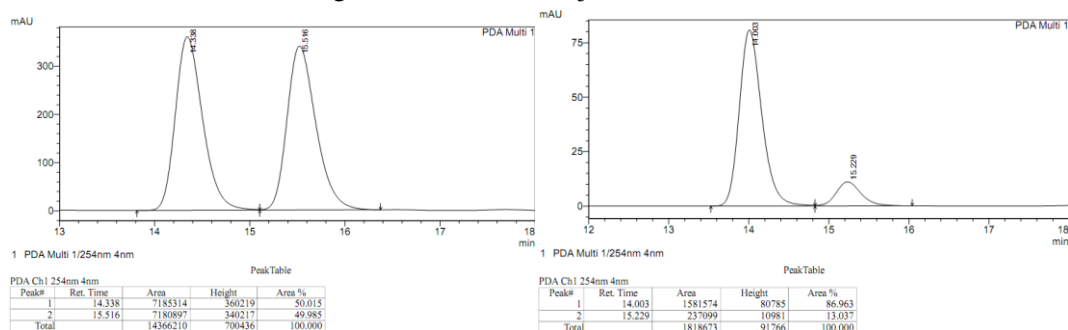

**(S)-4-(1-bromo-3,3,3-trichloropropyl)phenyltrimethylsilane (1j)**

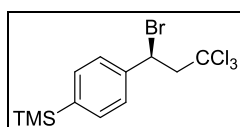

colorless oil, 70% yield.

TLC  $R_f = 0.7$  (Hexanes)

$^1\text{H}$  NMR (400 MHz,  $\text{CDCl}_3$ )  $\delta$  7.52 (d,  $J = 7.7$  Hz, 2H), 7.43 (d,  $J = 7.8$  Hz, 2H), 5.37 (t,  $J = 6.1$  Hz, 1H), 3.82 – 3.70 (m, 2H), 0.28 (s, 9H).

$^{13}\text{C}$  NMR (101 MHz,  $\text{CDCl}_3$ )  $\delta$  141.8, 141.2, 133.9, 126.9, 96.5, 62.6, 47.6, -1.2.

**Optical Rotation:**  $[\alpha]_D^{25}$ : -76.6 ( $c = 1.0$ ,  $\text{CHCl}_3$ ) The absolute configuration was assigned by analogy to **1a**.

**EI MS**  $m/z$ :  $[\text{M}-\text{Br}]^+$  293.0

**88:12 er** HPLC condition: Daicel Chiralpak OD-H column, conditions: hexanes, flow rate = 0.5 mL/min, wavelength = 254 nm;  $t_R$  (major) = 9.7 min and  $t_R$  (minor) = 10.8 min

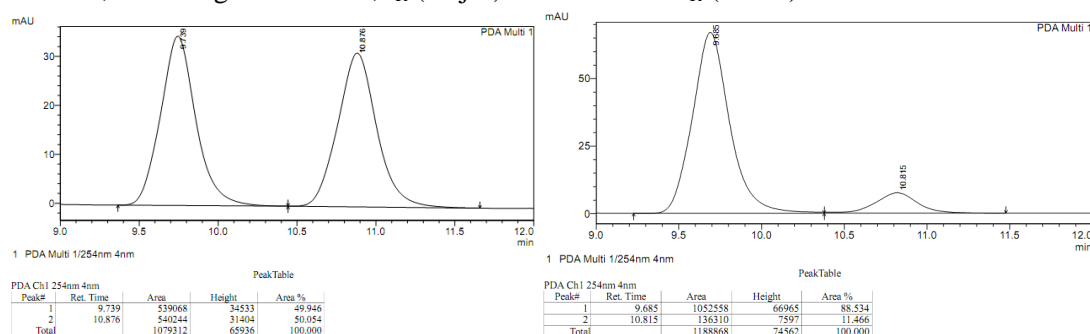

**(S)-4-(1-bromo-3,3,3-trichloropropyl)phenyl acetate (1k)**

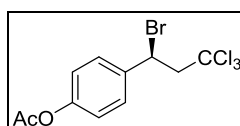

white solid, 70% yield

TLC  $R_f = 0.50$  (Hexane/EtOAc = 30:1, v/v)

$^1\text{H}$  NMR (400 MHz,  $\text{CDCl}_3$ )  $\delta$  7.46 (d,  $J = 8.6$  Hz, 2H), 7.09 (d,  $J = 8.6$  Hz, 2H), 5.37 (dd,  $J = 7.6, 4.8$  Hz, 1H), 3.79 – 3.66 (m, 2H), 2.30 (s, 3H).

$^{13}\text{C}$  NMR (101 MHz,  $\text{CDCl}_3$ )  $\delta$  169.1, 150.8, 138.2, 128.9, 122.0, 96.4, 62.7, 46.6, 21.2.

**Optical Rotation:**  $[\alpha]_{\text{D}}^{25}$ : -78.0 ( $c = 1.0$ ,  $\text{CHCl}_3$ ) The absolute configuration was assigned by analogy to **1a**.

**EI MS**  $m/z$ :  $[\text{M}-\text{Br}]^+$  281.0

**89:11 er** HPLC condition: Daicel Chiralpak OJ-H column, conditions: hexanes/*i*-PrOH = 99.5/0.5, flow rate = 1.0 mL/min, wavelength = 254 nm;  $t_{\text{R}}$  (minor) = 21.3 min and  $t_{\text{R}}$  (major) = 23.2 min.

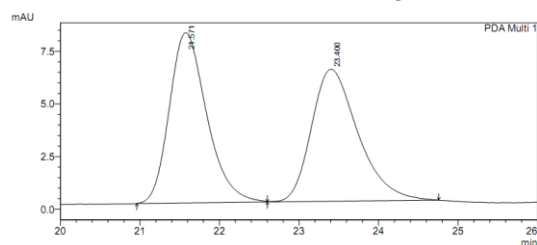

1 PDA Multi 1/254nm 4nm

| Peak# | Ret. Time | Area   | Height | Area %  |
|-------|-----------|--------|--------|---------|
| 1     | 21.571    | 263946 | 8082   | 50.785  |
| 2     | 23.400    | 255789 | 6268   | 49.215  |
| Total |           | 519735 | 14350  | 100.000 |

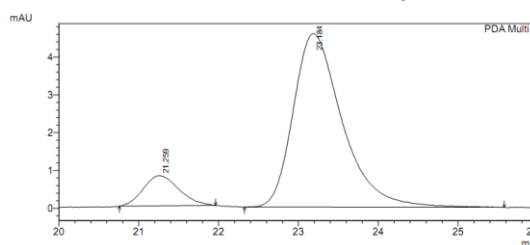

1 PDA Multi 1/254nm 4nm

| Peak# | Ret. Time | Area   | Height | Area %  |
|-------|-----------|--------|--------|---------|
| 1     | 21.299    | 24680  | 798    | 11.194  |
| 2     | 23.164    | 195799 | 4593   | 88.806  |
| Total |           | 220479 | 5388   | 100.000 |

**(S)-1-(1-bromo-3,3,3-trichloropropyl)-4-fluorobenzene (1l)** (Literature data of +/- **1l**)<sup>3</sup>

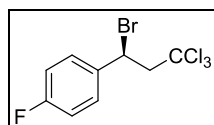

colorless oil, 60% yield

TLC  $R_f = 0.6$  (Hexanes)

$^1\text{H}$  NMR (400 MHz,  $\text{CDCl}_3$ )  $\delta$  7.50 – 7.36 (m, 2H), 7.11 – 6.98 (m, 2H), 5.37 (dd,  $J = 8.0, 4.8$  Hz, 1H), 3.80 – 3.63 (m, 2H).

$^{19}\text{F}$  NMR (376 MHz,  $\text{CDCl}_3$ )  $\delta$  -112.0.

$^{13}\text{C}$  NMR (101 MHz,  $\text{CDCl}_3$ )  $\delta$  162.7 (d,  $J = 248.9$  Hz), 136.6 (d,  $J = 3.6$  Hz), 129.7 (d,  $J = 8.4$  Hz), 115.9 (d,  $J = 22.0$  Hz), 96.3, 62.6, 46.6.

**Optical Rotation:**  $[\alpha]_{\text{D}}^{25}$ : -95.1 ( $c = 1.0$ ,  $\text{CHCl}_3$ ) The absolute configuration was assigned by analogy to **1a**.

**EI MS**  $m/z$ :  $[\text{M}-\text{Br}]^+$  239.0

**92:8 er** HPLC condition: Daicel Chiralpak OJ-H column, conditions: hexanes/*i*-PrOH = 90/10, flow rate = 0.5 mL/min, wavelength = 254 nm;  $t_{\text{R}}$  (major) = 10.3 min and  $t_{\text{R}}$  (minor) = 10.9 min.

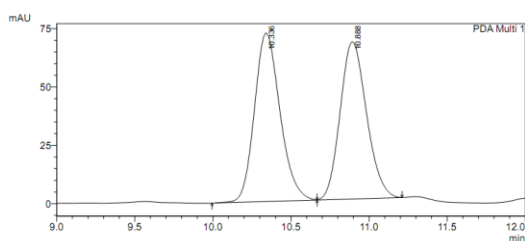

1 PDA Multi 1/254nm 4nm

| Peak# | Ret. Time | Area    | Height | Area %  |
|-------|-----------|---------|--------|---------|
| 1     | 10.336    | 823952  | 72121  | 50.966  |
| 2     | 10.888    | 792728  | 67424  | 49.034  |
| Total |           | 1616680 | 139545 | 100.000 |

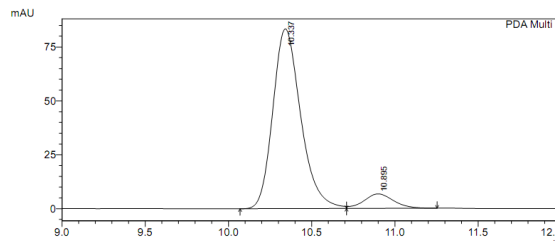

1 PDA Multi 1/254nm 4nm

| Peak# | Ret. Time | Area    | Height | Area %  |
|-------|-----------|---------|--------|---------|
| 1     | 10.337    | 971152  | 83301  | 92.229  |
| 2     | 10.895    | 81825   | 6691   | 7.771   |
| Total |           | 1052978 | 89991  | 100.000 |

**(S)-1-(1-bromo-3,3,3-trichloropropyl)-4-chlorobenzene (1m)** (Literature data of +/- **1m**)<sup>4</sup>

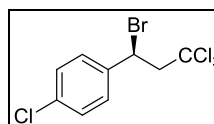

white solid, 61% yield

TLC  $R_f = 0.6$  (Hexanes)

$^1\text{H NMR}$  (400 MHz,  $\text{CDCl}_3$ )  $\delta$  7.43 – 7.37 (m, 2H), 7.36 – 7.31 (m, 2H), 5.34 (dd,  $J = 7.9, 4.9$  Hz, 1H), 3.80 – 3.63 (m, 2H).

$^{13}\text{C NMR}$  (101 MHz,  $\text{CDCl}_3$ )  $\delta$  139.2, 134.7, 129.2, 129.1, 96.2, 62.5, 46.4.

**Optical Rotation:**  $[\alpha]_D^{25}$ : -80.4 ( $c = 1.0, \text{CHCl}_3$ ) The absolute configuration was assigned by analogy to **1a**.

**EI MS**  $m/z$ :  $[\text{M}-\text{Br}]^+$  256.9

**89:11 er HPLC** condition: Daicel Chiralpak OJ-H column, conditions: hexanes/*i*-PrOH = 90/10, flow rate = 0.5 mL/min, wavelength = 254 nm;  $t_R$  (major) = 9.8 min and  $t_R$  (minor) = 10.3 min.

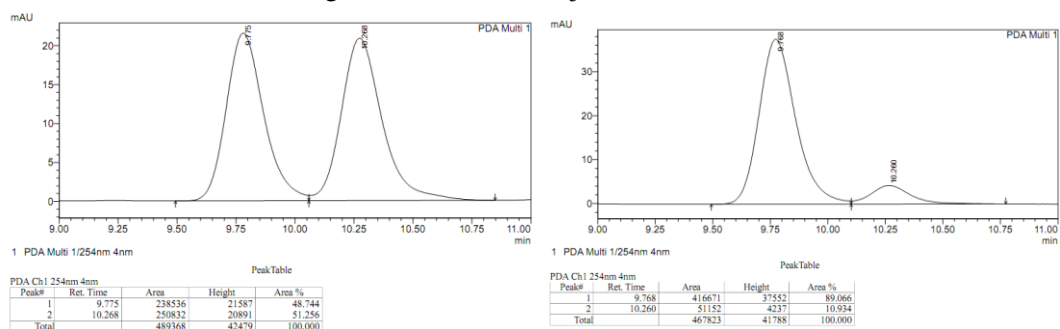

**(S)-1-(1-bromo-3,3,3-trichloropropyl)-4-bromobenzene (1n)** (Literature data of +/- **1n**)<sup>5</sup>

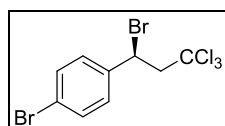

white solid, 58% yield

TLC  $R_f = 0.6$  (Hexanes)

$^1\text{H NMR}$  (400 MHz,  $\text{CDCl}_3$ )  $\delta$  7.49 (d,  $J = 8.5$  Hz, 2H), 7.33 (d,  $J = 8.5$  Hz, 2H), 5.33 (dd,  $J = 7.8, 4.9$  Hz, 1H), 3.81 – 3.61 (m, 2H).

$^{13}\text{C NMR}$  (101 MHz,  $\text{CDCl}_3$ )  $\delta$  139.7, 132.0, 129.5, 122.9, 96.2, 62.4, 46.4.

**Optical Rotation:**  $[\alpha]_D^{24}$ : -65.8 ( $c = 1.0, \text{CHCl}_3$ ) The absolute configuration was assigned by analogy to **1a**.

**EI MS**  $m/z$ :  $[\text{M}-\text{Br}]^+$  300.9

**86:14 er HPLC** condition: Daicel Chiralpak OJ-H column, conditions: hexanes/*i*-PrOH = 90/10, flow rate = 0.5 mL/min, wavelength = 254 nm;  $t_R$  (major) = 9.8 min and  $t_R$  (minor) = 10.2 min.

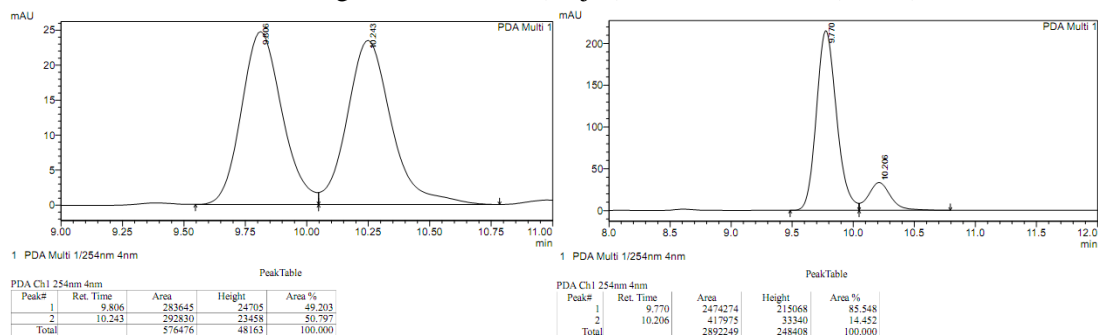

**(S)-2-(1-bromo-3,3,3-trichloropropyl)naphthalene (1o)**

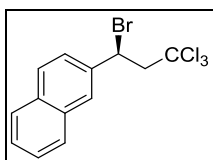

white solid, 90% yield

TLC  $R_f = 0.5$  (Hexanes)

$^1\text{H NMR}$  (400 MHz,  $\text{CDCl}_3$ )  $\delta$  7.94-7.76 (m, 4H), 7.67 – 7.58 (m, 1H), 7.57-7.45 (m, 2H), 5.67 – 5.52 (m, 1H), 3.98-3.74(m, 2H).

$^{13}\text{C NMR}$  (101 MHz,  $\text{CDCl}_3$ )  $\delta$  137.8, 133.3, 132.9, 129.1, 128.2, 127.8, 127.0, 126.9, 126.7, 125.0, 96.5, 62.4, 48.2.

**Optical Rotation:**  $[\alpha]_D^{25}$ : -47.8 ( $c = 1.0$ ,  $\text{CHCl}_3$ ) The absolute configuration was assigned by analogy to **1a**.

This compound will decompose quickly after being injected into MS.

**90:10 er HPLC condition:** Daicel Chiralpak OJ-H column, conditions: hexanes/*i*-PrOH = 90/10, flow rate = 0.5 mL/min, wavelength = 254 nm;  $t_R$  (minor) = 16.5 min and  $t_R$  (major) = 19.4 min.

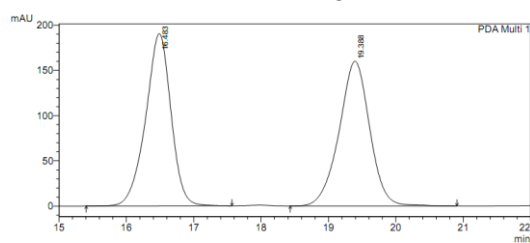

| PeakTable |           |          |        |         |
|-----------|-----------|----------|--------|---------|
| Peak#     | Ret. Time | Area     | Height | Area %  |
| 1         | 16.483    | 4984799  | 190489 | 49.649  |
| 2         | 19.388    | 5052226  | 160956 | 50.351  |
| Total     |           | 10040025 | 350545 | 100.000 |

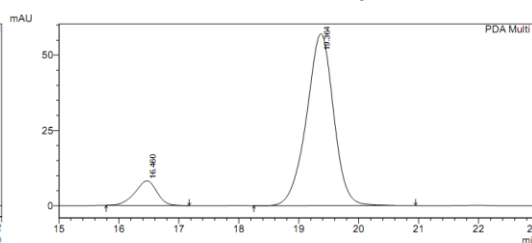

| PeakTable |           |         |        |         |
|-----------|-----------|---------|--------|---------|
| Peak#     | Ret. Time | Area    | Height | Area %  |
| 1         | 16.460    | 208442  | 8174   | 10.426  |
| 2         | 19.364    | 1790851 | 57064  | 89.574  |
| Total     |           | 1999293 | 65238  | 100.000 |

**(S)-1-(1-bromo-3,3,3-trichloropropyl)-2,4-dimethylbenzene (1q)** (Literature data of +/- **1q**)<sup>2</sup>

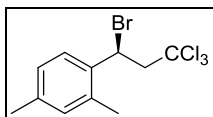

colorless oil, 60% yield

TLC  $R_f = 0.7$  (Hexanes)

$^1\text{H NMR}$  (400 MHz,  $\text{CDCl}_3$ )  $\delta$  7.39 (d,  $J = 8.0$  Hz, 1H), 7.06 (d,  $J = 8.0$  Hz, 1H), 6.96 (s, 1H), 5.65 (dd,  $J = 7.7, 4.4$  Hz, 1H), 3.92 – 3.69 (m, 2H), 2.42 (s, 3H), 2.30 (s, 3H).

$^{13}\text{C NMR}$  (101 MHz,  $\text{CDCl}_3$ )  $\delta$  138.7, 136.2, 135.0, 131.6, 127.8, 127.6, 96.7, 62.2, 21.1, 19.3.

**Optical Rotation:**  $[\alpha]_D^{25}$ : -20.0 ( $c = 1.0$ ,  $\text{CHCl}_3$ ) The absolute configuration was assigned by analogy to **1a**.

**EI MS**  $m/z$ :  $[\text{M}-\text{Br}]^+$  249.0

**92:8 er HPLC condition:** Daicel Chiralpak OJ-H column, conditions: hexanes, flow rate = 0.5 mL/min, wavelength = 254 nm;  $t_R$  (minor) = 10.9 min and  $t_R$  (major) = 12.5 min.

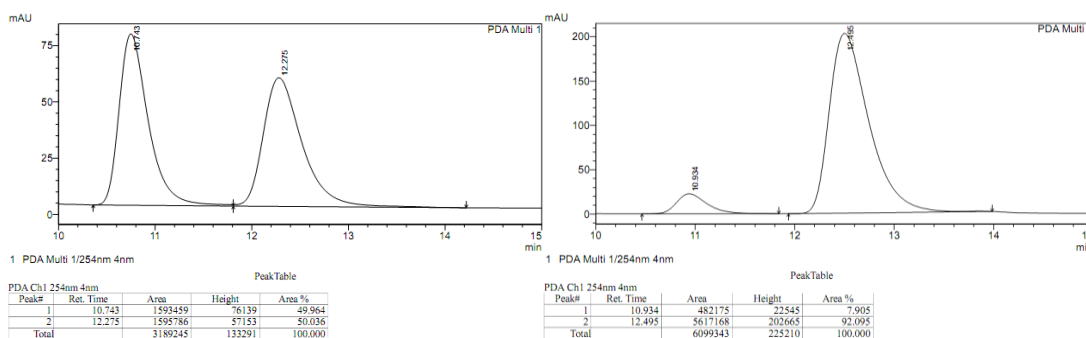

### (S)-1-(1-bromo-3,3,3-trichloropropyl)-3,5-dimethylbenzene (1r)

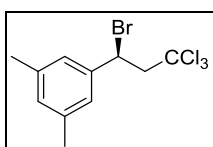

colorless oil, 60% yield.

TLC  $R_f = 0.7$  (Hexanes)

$^1\text{H NMR}$  (400 MHz,  $\text{CDCl}_3$ )  $\delta$  7.05 (s, 2H), 6.94 (s, 1H), 5.31 (t,  $J = 6.1$  Hz, 1H), 3.73 (dd,  $J = 6.1$ , 1.0 Hz, 2H), 2.32 (s, 6H).

$^{13}\text{C NMR}$  (101 MHz,  $\text{CDCl}_3$ )  $\delta$  140.8, 138.5, 130.6, 125.4, 96.6, 62.6, 47.8, 21.3.

**Optical Rotation:**  $[\alpha]_D^{25}$ : -77.1 ( $c = 1.0$ ,  $\text{CHCl}_3$ ) The absolute configuration was assigned by analogy to **1a**.

**EI MS**  $m/z$ :  $[\text{M}-\text{Br}]^+$  251.0

**89:11 er HPLC** condition: Daicel Chiralpak OD-H column, conditions: hexanes, flow rate = 0.5 mL/min, wavelength = 254 nm;  $t_R$  (minor) = 14.5 min and  $t_R$  (major) = 16.4 min

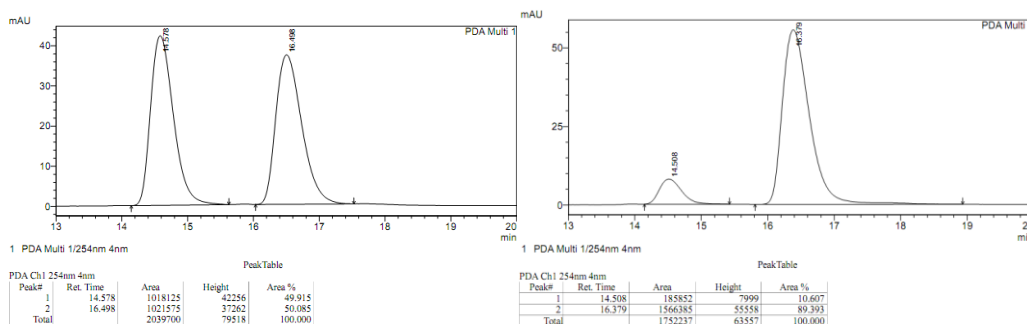

### (S)-5-(1-bromo-3,3,3-trichloropropyl)-2,3-dihydro-1H-indene (1s)

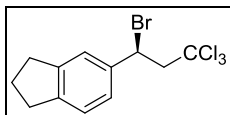

colorless oil, 62% yield.

TLC  $R_f = 0.7$  (Hexanes)

$^1\text{H NMR}$  (400 MHz,  $\text{CDCl}_3$ )  $\delta$  7.31 (s, 1H), 7.20 (s, 2H), 5.38 (t,  $J = 6.2$  Hz, 1H), 3.75 (d,  $J = 6.2$  Hz, 2H), 2.90 (q,  $J = 7.3$  Hz, 4H), 2.09 (p,  $J = 7.5$  Hz, 2H).

$^{13}\text{C NMR}$  (101 MHz,  $\text{CDCl}_3$ )  $\delta$  145.4, 145.1, 138.8, 125.7, 124.6, 123.6, 96.6, 62.7, 48.3, 32.7, 32.6, 25.4.

**Optical Rotation:**  $[\alpha]_D^{25}$ : -95.0 ( $c = 1.0$ ,  $\text{CHCl}_3$ ) The absolute configuration was assigned by analogy to **1a**.



**EI MS** m/z: [M-Br]<sup>+</sup> 261.0

**92:8 er** HPLC condition: Daicel Chiralpak OJ-H column, conditions: hexanes, flow rate = 0.5 mL/min, wavelength = 254 nm; t<sub>R</sub> (minor) = 18.7 min and t<sub>R</sub> (major) = 22.7 min

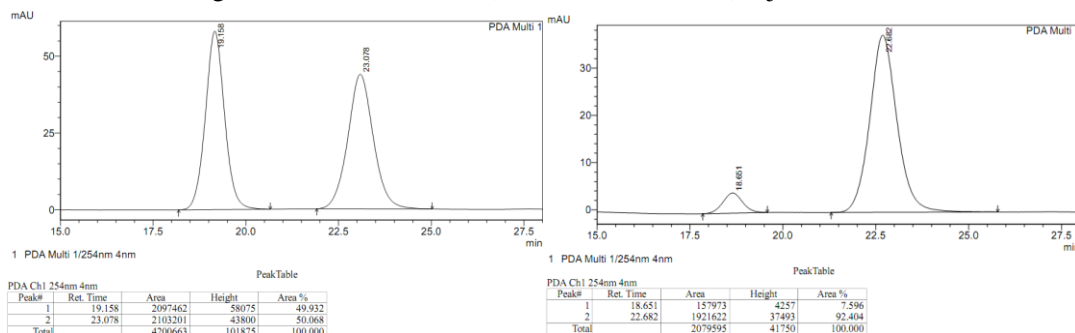

**(S)-3-(1-bromo-3,3,3-trichloropropyl)pyridine (1t)**

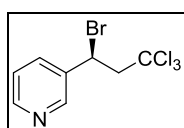

yellow oil, 55% yield.

TLC R<sub>f</sub> = 0.6 (Hexanes:EtOAc = 5:1, v/v)

<sup>1</sup>H NMR (400 MHz, CDCl<sub>3</sub>) δ 8.68 (s, 1H), 8.55 (d, *J* = 4.1 Hz, 1H), 7.80 (d, *J* = 8.0 Hz, 1H), 7.32 (dd, *J* = 8.0, 4.8 Hz, 1H), 5.37 (dd, *J* = 8.5, 4.5 Hz, 1H), 3.89 – 3.60 (m, 2H).

<sup>13</sup>C NMR (101 MHz, CDCl<sub>3</sub>) δ 150.1, 148.9, 136.5, 135.4, 123.7, 96.0, 62.2, 43.9.

**Optical Rotation:** [α]<sub>D</sub><sup>25</sup>: -52.0 (c = 1.0, CHCl<sub>3</sub>) The absolute configuration was assigned by analogy to **1a**.

**EI MS** m/z: [M-Br]<sup>+</sup> 222.0

**81:19 er** HPLC condition: Daicel Chiralpak OD-H column, conditions: hexanes/*i*-PrOH = 95/5, flow rate = 0.5 mL/min, wavelength = 254 nm; t<sub>R</sub> (major) = 18.3 min and t<sub>R</sub> (major) = 22.9 min

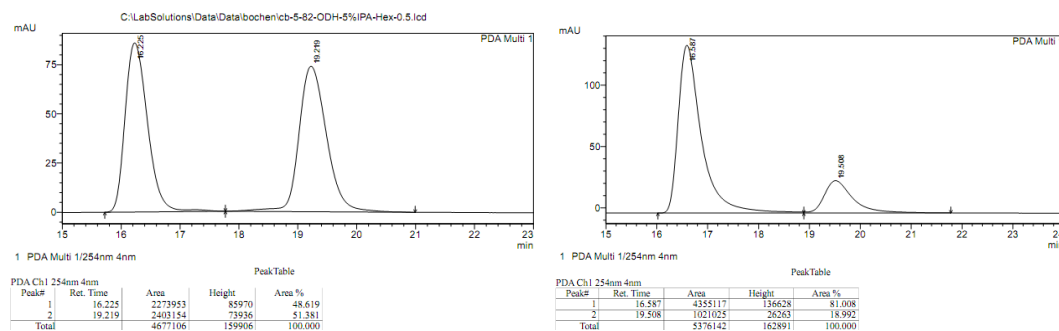

**(S)-1-(1,3-dibromo-3,3-dichloropropyl)-4-methylbenzene (1v)**

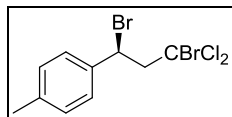

colorless oil, 59% yield.

TLC R<sub>f</sub> = 0.7 (Hexanes)

<sup>1</sup>H NMR (400 MHz, CDCl<sub>3</sub>) δ 7.45 – 7.30 (m, 2H), 7.22 – 7.10 (m, 2H), 5.44 – 5.30 (m, 1H), 3.92 – 3.78 (m, 2H), 2.37 (s, 3H).

<sup>13</sup>C NMR (101 MHz, CDCl<sub>3</sub>) δ 138.9, 137.8, 129.6, 127.8, 78.1, 64.0, 48.5, 21.3.

**Optical Rotation:** [α]<sub>D</sub><sup>25</sup>: -98.1 (c = 1.0, CHCl<sub>3</sub>) The absolute configuration was assigned by analogy to **1a**.

**EI MS** m/z: [M-Br]<sup>+</sup> 281.0

**94:6 er HPLC condition:** Daicel Chiralpak OJ-H column, conditions: hexanes, flow rate = 0.5 mL/min, wavelength = 254 nm;  $t_R$  (minor) = 18.3 min and  $t_R$  (major) = 22.9 min

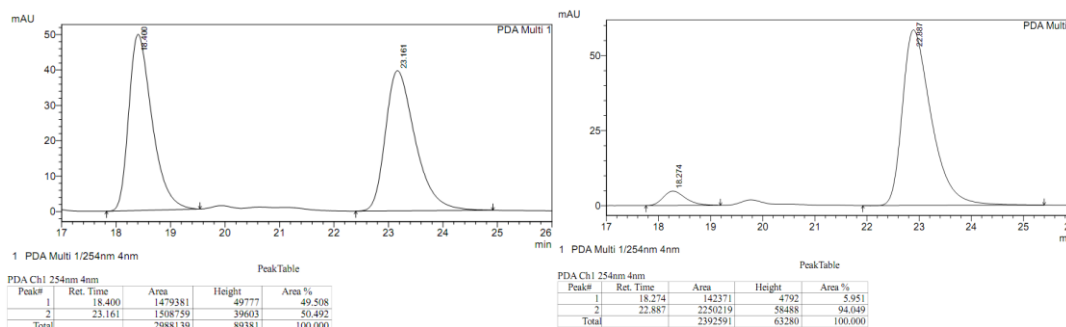

**(S)-1-methyl-4-(1,3,3-tribromo-3-chloropropyl)benzene (1w)**

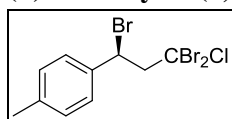

colorless oil, 56% yield.

(Note:  $\text{CBr}_3\text{Cl}$  was synthesized from  $\text{CBr}_3\text{H}$  and sodium hypochlorite according Burton's procedures<sup>6</sup>. The purity of homemade  $\text{CBr}_3\text{Cl}$  is ca. 90%, which contains 10% of  $\text{CBr}_4$  based on GC analysis)

TLC  $R_f$  = 0.7 (Hexanes)

$^1\text{H}$  NMR (400 MHz,  $\text{CDCl}_3$ )  $\delta$  7.36 (d,  $J$  = 8.1 Hz, 2H), 7.17 (d,  $J$  = 7.9 Hz, 2H), 5.35 (dd,  $J$  = 7.5, 4.7 Hz, 1H), 4.08 – 3.86 (m, 2H), 2.35 (s, 3H).

$^{13}\text{C}$  NMR (101 MHz,  $\text{CDCl}_3$ )  $\delta$  139.0, 137.8, 129.5, 127.9, 65.3, 57.7, 49.4, 21.3.

**Optical Rotation:**  $[\alpha]_D^{25}$ : -76.0 ( $c$  = 1.0,  $\text{CHCl}_3$ ) The absolute configuration was assigned by analogy to **1a**.

**EI MS**  $m/z$ :  $[\text{M}-\text{Br}]^+$  324.9

**94:6 er HPLC condition:** Daicel Chiralpak OJ-H column, conditions: hexanes, flow rate = 0.5 mL/min, wavelength = 254 nm;  $t_R$  (minor) = 20.5 min and  $t_R$  (major) = 26.1 min.

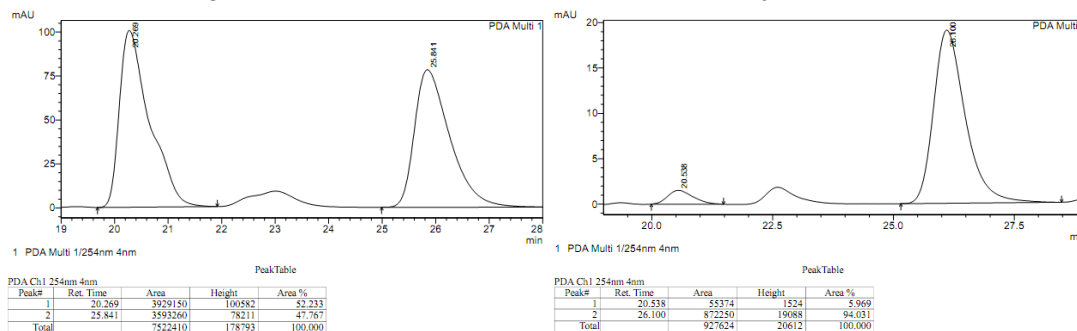

**(S)-1-methyl-4-(1,3,3,3-tetrabromopropyl)benzene (1x)**

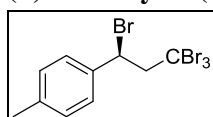

colorless oil, 60% yield.

TLC  $R_f$  = 0.7 (Hexanes)

$^1\text{H}$  NMR (400 MHz,  $\text{CDCl}_3$ )  $\delta$  7.38 (d,  $J$  = 8.0 Hz, 12H), 7.26 (s, 1H), 7.17 (d,  $J$  = 7.8 Hz, 10H), 5.33 (dd,  $J$  = 7.7, 4.1 Hz, 5H), 4.16 – 4.00 (m, 12H), 2.35 (s, 16H).

$^{13}\text{C}$  NMR (101 MHz,  $\text{CDCl}_3$ )  $\delta$  139.0, 137.8, 129.5, 128.0, 66.4, 50.3, 35.2, 21.3.

**Optical Rotation:**  $[\alpha]_D^{25}$ : -68.0 ( $c$  = 1.0,  $\text{CHCl}_3$ ) The absolute configuration was assigned by analogy to **1a**.

**EI MS**  $m/z$ :  $[M-Br]^+$  370.9

**94:6 er** HPLC condition: Daicel Chiralpak OJ-H column, conditions: hexanes, flow rate = 0.5 mL/min, wavelength = 254 nm;  $t_R$  (minor) = 23.1 min and  $t_R$  (major) = 29.4 min

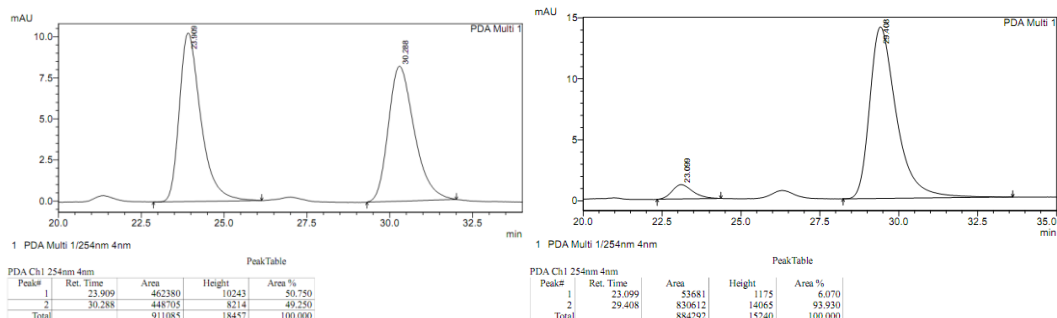

### (R)-(1-azido-3,3,3-trichloropropyl)benzene (11)

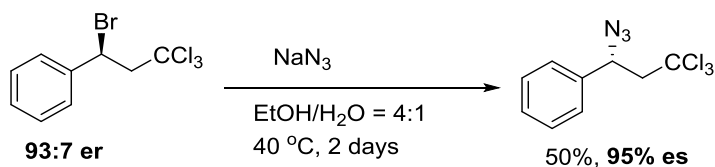

To a vial were added  $\text{NaN}_3$  (20.0 mg, 0.3 mmol), **1a** (30.2 mg, 0.1 mmol), EtOH (0.8 mL) and  $\text{H}_2\text{O}$  (0.2 mL). The reaction mixture was stirred for 48 h. Concentration under vacuum afforded the crude product, which was filtered quickly through a short pad of silica gel. Preparative TLC gave pure product (colorless oil, 13 mg, 50%) (eluent: hexanes)

TLC  $R_f = 0.4$  (Hexanes)

$^1\text{H NMR}$  (400 MHz,  $\text{CDCl}_3$ )  $\delta$  7.48 – 7.31 (m, 5H), 4.95 (dd,  $J = 7.3, 3.9$  Hz, 1H), 3.22 (dd,  $J = 15.2, 7.2$  Hz, 1H), 3.11 (dd,  $J = 15.2, 3.9$  Hz, 1H).

$^{13}\text{C NMR}$  (101 MHz,  $\text{CDCl}_3$ )  $\delta$  138.6, 129.2, 128.9, 126.9, 96.6, 63.4, 60.0.

**EI MS**  $[\text{C}_9\text{H}_8\text{Cl}_3\text{N}_3, \text{M}]^+$ : 263.0  $[\text{M}-\text{N}_3]^+$ : 221.0

**Optical Rotation:**  $[\alpha]_D^{25}$ : +99.1 ( $c = 0.5, \text{CHCl}_3$ )

**9:91 er** HPLC condition: Daicel Chiralpak OD-H column, conditions: hexanes, flow rate = 0.5 mL/min, wavelength = 254 nm;  $t_R$  (minor) = 18.7 min and  $t_R$  (major) = 23.2 min.

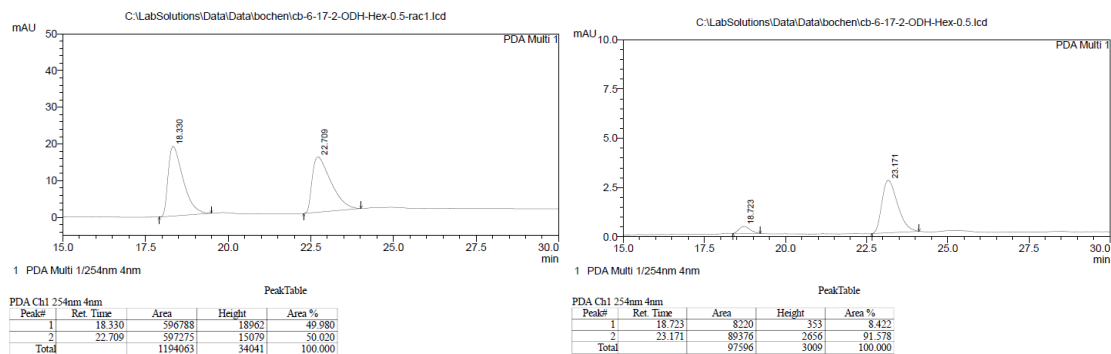

### (R)-S-(3,3,3-trichloro-1-phenylpropyl) ethanethioate (12)

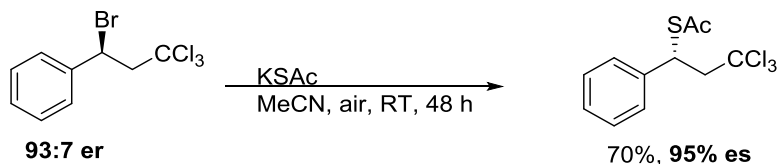

To a vial were added KSAc (34.3 mg, 0.3 mmol), **1a** (30.2 mg, 0.1 mmol), and MeCN (0.5 mL) (solvent grade, not anhydrous) under an air atmosphere. The reaction mixture was sealed and stirred for 48 h (monitored by TLC). Concentration under vacuum afforded the crude product, which was filtered quickly through a short pad of silica gel. Flash column chromatography gave pure product (dark oil, 21 mg, 70%) (eluent hexanes/EA = 100/1-20/1)

TLC  $R_f$  = 0.4 (Hexanes/EA = 10/1)

$^1\text{H NMR}$  (400 MHz,  $\text{CDCl}_3$ )  $\delta$  7.39 – 7.23 (m, 5H), 5.10 (dd,  $J$  = 8.4, 4.4 Hz, 1H), 3.51 – 3.31 (m, 2H), 2.31 (s, 3H).

$^{13}\text{C NMR}$  (101 MHz,  $\text{CDCl}_3$ )  $\delta$  193.4, 139.8, 128.8, 128.1, 127.9, 97.2, 59.4, 45.5, 30.3.

EI MS  $[\text{C}_{11}\text{H}_{11}\text{Cl}_3\text{OS}, \text{M}]^+$  : 296.0

**Optical Rotation:**  $[\alpha]_D^{25}$  : +172.3 ( $c$  = 1.0,  $\text{CHCl}_3$ )

**9:91 er** HPLC condition: Daicel Chiralpak OD-H column, conditions: hexanes/*i*-PrOH = 90/10, flow rate = 0.5 mL/min, wavelength = 225 nm;  $t_R$  (minor) = 8.6 min and  $t_R$  (major) = 11.6 min.

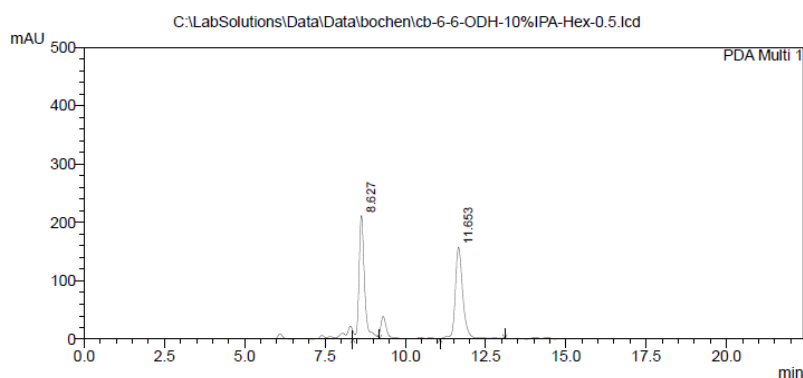

PeakTable

| Peak# | Ret. Time | Area    | Height | Area %  |
|-------|-----------|---------|--------|---------|
| 1     | 8.627     | 2522396 | 211686 | 49.541  |
| 2     | 11.653    | 2569115 | 156858 | 50.459  |
| Total |           | 5091512 | 368544 | 100.000 |

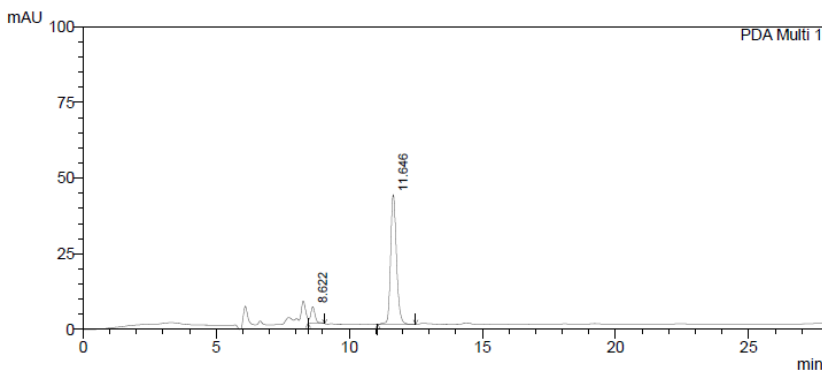

PeakTable

| Peak# | Ret. Time | Area   | Height | Area %  |
|-------|-----------|--------|--------|---------|
| 1     | 8.622     | 64575  | 5460   | 8.976   |
| 2     | 11.646    | 654815 | 42822  | 91.024  |
| Total |           | 719390 | 48282  | 100.000 |

## Cross-over experiment

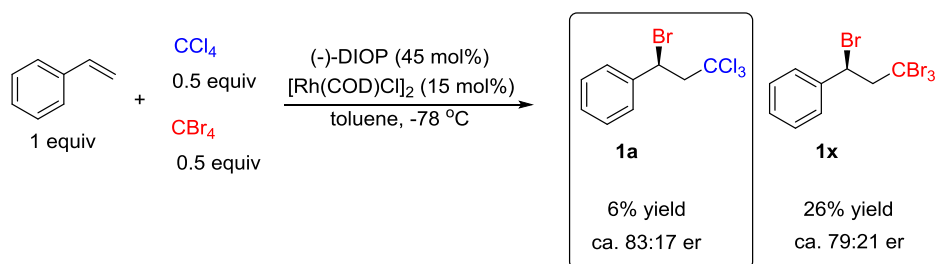

To a dried vial were added  $[\text{Rh}(\text{COD})\text{Cl}]_2$  (18.5 mg, 0.0375 mmol), (-)-DIOP (48.0 mg, 0.1125 mmol), and toluene (2 mL) under an argon atmosphere. The reaction mixture was stirred for 20 min at RT and then cooled to  $-78\text{ }^\circ\text{C}$ . A solution of styrene (0.25 mmol, 26 mg, 0.03 mL,  $d = 1.5867\text{ g/mL}$ ),  $\text{CBr}_4$  (0.125 mmol, 41.5 mg) and  $\text{CCl}_4$  (0.125 mmol, 19.2 mg, 0.012 mL,  $d = 2.01\text{ g/mL}$ ) in toluene (0.5 mL) was added slowly by a syringe over 10 min. The reaction was vigorously stirred at  $-78\text{ }^\circ\text{C}$  for 12 h. Cold hexanes (5 mL, cooled in dry ice/acetone bath) were added to dilute the reaction and precipitate the catalyst, and the mixture was filtered quickly through a short pad of silica gel. The filtrate was collected, and concentrated under vacuum. The crude mixtures were evaluated by  $^1\text{H}$  NMR using  $\text{CH}_2\text{Br}_2$  as the internal standard. Compounds **1a** and **1x** were inseparable through flash column chromatography but assignable by  $^1\text{H}$  NMR compared with the authentic sample. Enantiomeric ratio was detected by HPLC.

Compound **1a**, 83:17 er

HPLC condition: Daicel Chiralpak OJ-H column, conditions: hexanes/*i*-PrOH = 95/5, flow rate = 0.5 mL/min, wavelength = 254 nm;  $t_{\text{R}}$  (minor) = 17.4 min and  $t_{\text{R}}$  (major) = 19.4 min.

Compound **1x**, 81:19 er

$t_{\text{R}}$  (major) = 23.9 min and  $t_{\text{R}}$  (minor) = 28.0 min.

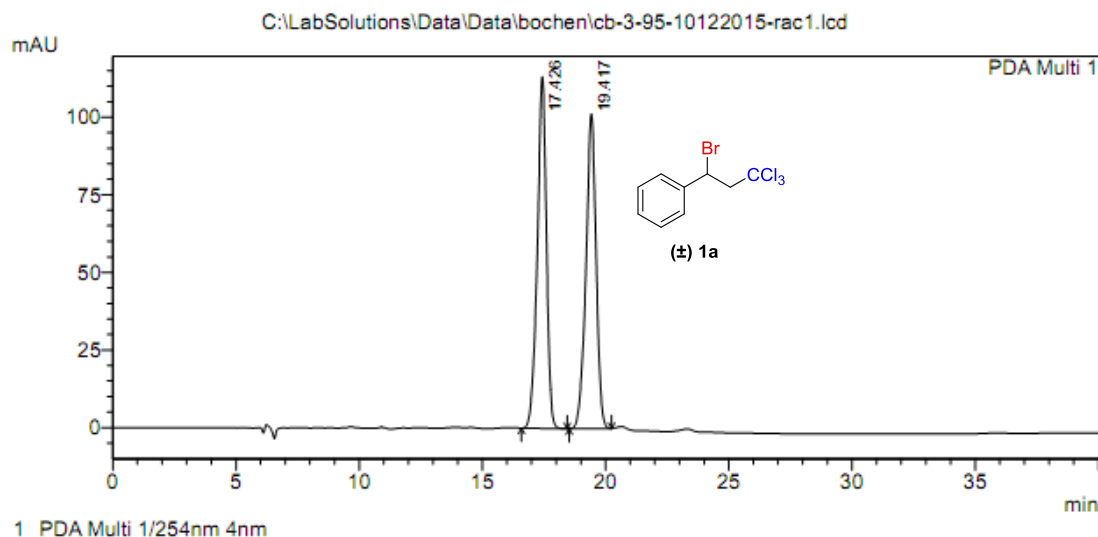

PDA Ch1 254nm 4nm

PeakTable

| Peak# | Ret. Time | Area    | Height | Area %  | Height % |
|-------|-----------|---------|--------|---------|----------|
| 1     | 17.426    | 2920433 | 113357 | 50.104  | 52.782   |
| 2     | 19.417    | 2908292 | 101408 | 49.896  | 47.218   |
| Total |           | 5828725 | 214765 | 100.000 | 100.000  |

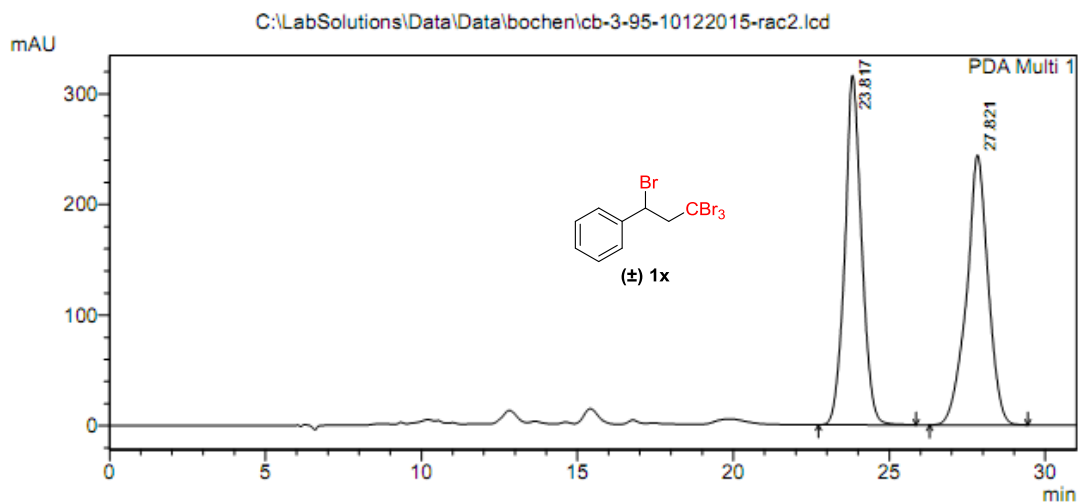

PeakTable

PDA Ch1 254nm 4nm

| Peak# | Ret. Time | Area     | Height | Area %  | Height % |
|-------|-----------|----------|--------|---------|----------|
| 1     | 23.817    | 11848683 | 316325 | 50.162  | 56.428   |
| 2     | 27.821    | 11772175 | 244259 | 49.838  | 43.572   |
| Total |           | 23620858 | 560584 | 100.000 | 100.000  |

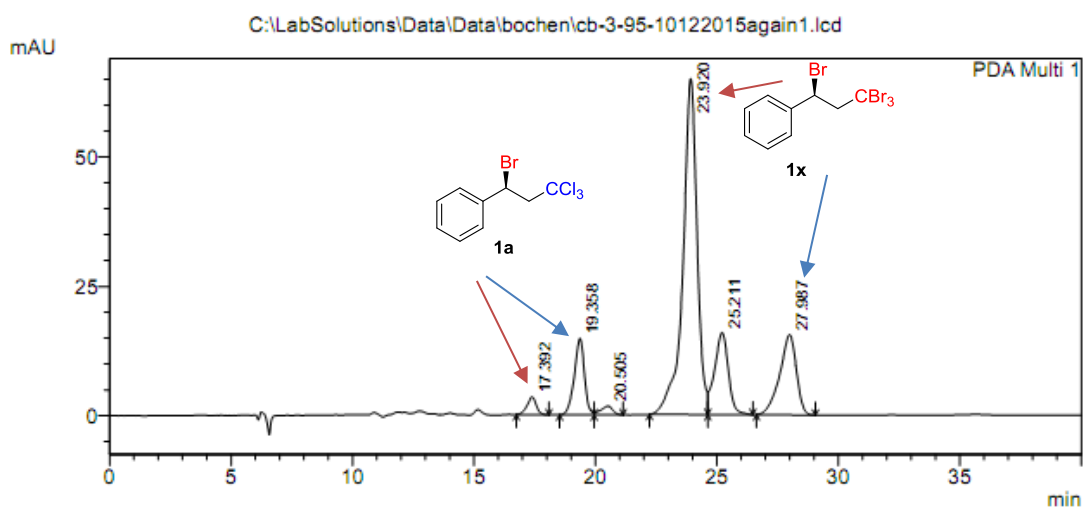

PeakTable

PDA Ch1 254nm 4nm

| Peak# | Ret. Time | Area    | Height | Area %  | Height % |
|-------|-----------|---------|--------|---------|----------|
| 1     | 17.392    | 89874   | 3421   | 1.965   | 2.946    |
| 2     | 19.358    | 427905  | 14766  | 9.358   | 12.714   |
| 3     | 20.505    | 57657   | 1703   | 1.261   | 1.466    |
| 4     | 23.920    | 2630061 | 64923  | 57.516  | 55.900   |
| 5     | 25.211    | 628120  | 15841  | 13.736  | 13.640   |
| 6     | 27.987    | 739153  | 15487  | 16.164  | 13.334   |
| Total |           | 4572770 | 116141 | 100.000 | 100.000  |

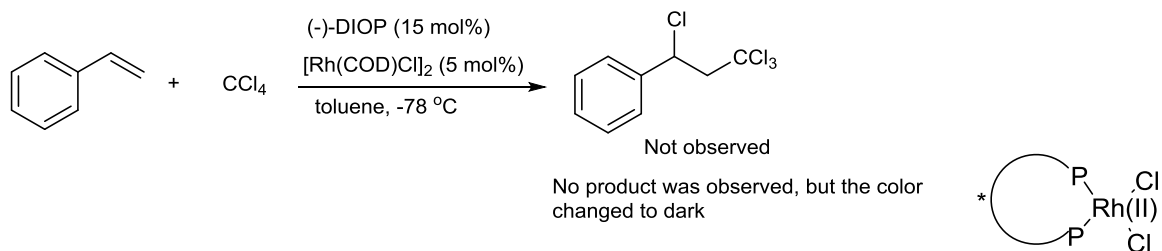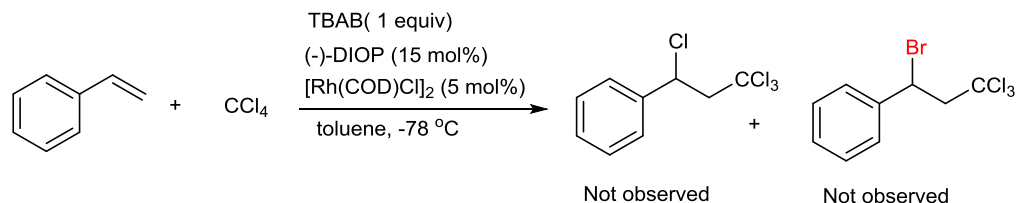

### Stereochemical Probe

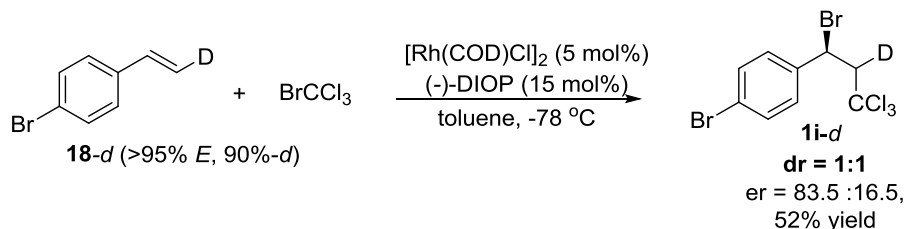

To a dried vial were added  $[\text{Rh}(\text{COD})\text{Cl}]_2$  (6.2 mg, 0.0125 mmol), (-)-DIOP (18.7 mg, 0.0375 mmol), and toluene (2 mL) under an argon atmosphere. The reaction mixture was stirred for 20 min at RT and then cooled to  $-78\text{ }^\circ\text{C}$ . A solution of **18-d**<sup>7</sup> (0.25 mmol, 46 mg, 0.03 mL, *d* = 0.926 g/mL) and  $\text{BrCCl}_3$  (0.5 mmol, 99.1 mg, 0.05 mL, *d* = 2.01 g/mL) in toluene (0.5 mL) was added slowly by a syringe over 10 min. The reaction was vigorously stirred at  $-78\text{ }^\circ\text{C}$  for 4 h. Cold hexanes (5 mL, cooled in dry ice/acetone bath) were added to dilute the reaction and precipitate the catalyst, and the mixture was filtered quickly through a short pad of silica gel. The filtrate was collected, and concentrated under vacuum to afford pure product (white solid, 50 mg, 52%). Diastereomeric ratio was determined by  $^{13}\text{C}$  NMR and Er was determined by HPLC.

**83.5:16.5 er**; conditions: Daicel Chiralpak OJ-H column, conditions: hexanes/*i*-PrOH = 90/10, flow rate = 0.5 mL/min, wavelength = 254 nm;  $t_{\text{R}}$  (major) = 10.1 min and  $t_{\text{R}}$  (minor) = 10.6 min.

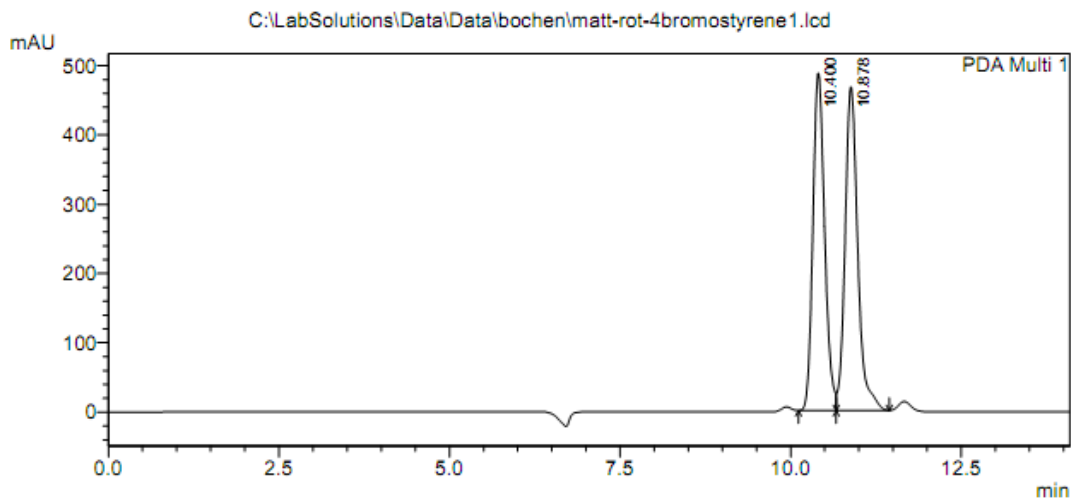

PeakTable

PDA Ch1 254nm 4nm

| Peak# | Ret. Time | Area     | Height | Area %  | Height % |
|-------|-----------|----------|--------|---------|----------|
| 1     | 10.400    | 5823397  | 486415 | 49.088  | 51.003   |
| 2     | 10.878    | 6039815  | 467293 | 50.912  | 48.997   |
| Total |           | 11863212 | 953707 | 100.000 | 100.000  |

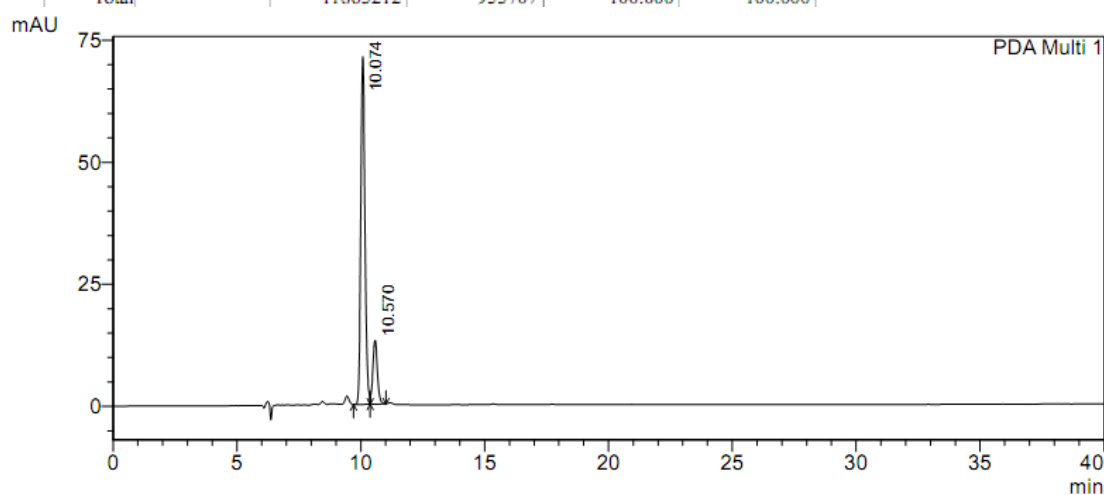

PeakTable

PDA Ch1 254nm 4nm

| Peak# | Ret. Time | Area    | Height | Area %  | Height % |
|-------|-----------|---------|--------|---------|----------|
| 1     | 10.074    | 835381  | 71247  | 83.257  | 84.463   |
| 2     | 10.570    | 167990  | 13105  | 16.743  | 15.537   |
| Total |           | 1003371 | 84352  | 100.000 | 100.000  |

## Reverse reaction

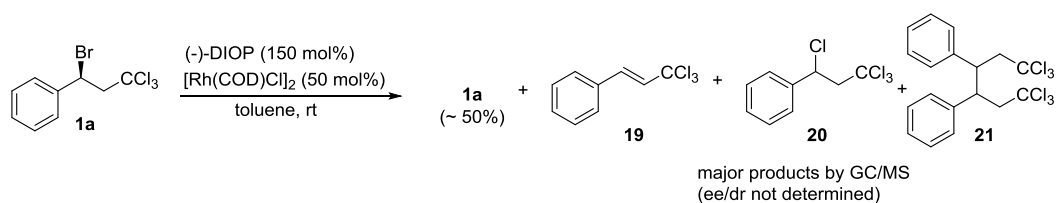

To a dried NMR tube were added  $[\text{Rh}(\text{COD})\text{Cl}]_2$  (4.9 mg, 0.01 mmol), (-)-DIOP (15.0 mg, 0.03 mmol), and toluene- $d_8$  (0.6 mL) under an argon atmosphere. After 20 min at RT, a solution of **1a** (0.02



mmol, 6 mg) in toluene- $d_8$  (0.6 mL) was added to the Rh catalyst system. The reaction was monitored using *in-situ* using  $^1\text{H}$  NMR and GC-MS. Compounds **19-21** were observed by GC-MS.

### Non-linear effect

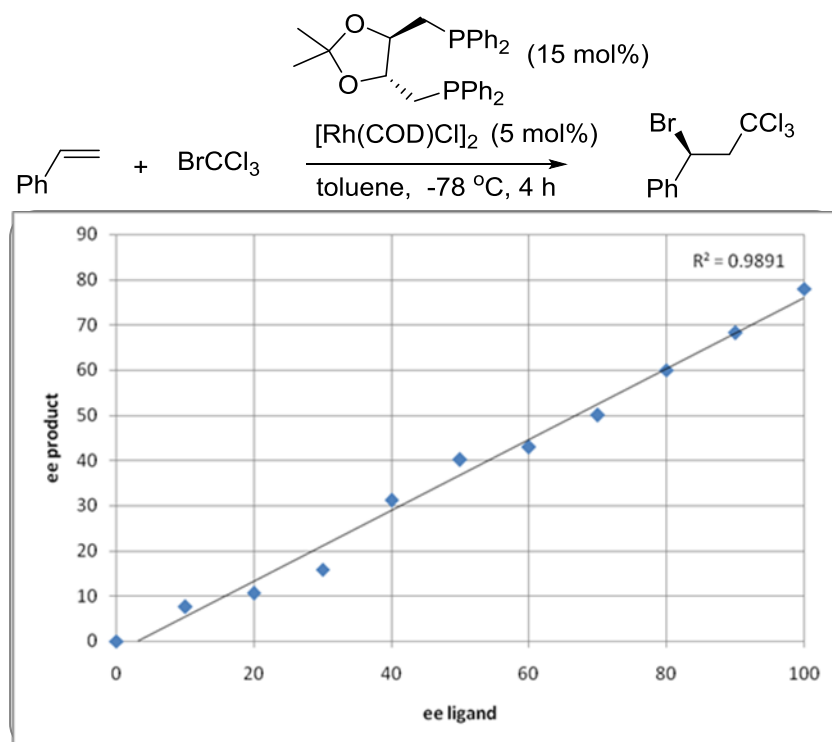

### Synthesis of DIOPs

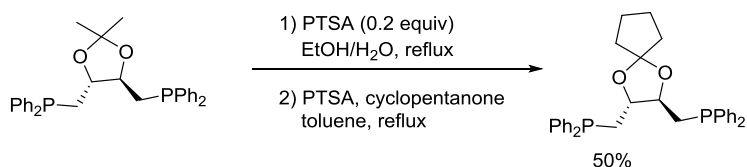

A solution of  $(R,R)$ -DIOP (Sigma Aldrich cat#237655) (100 mg, 0.2 mmol, 1.0 eq) and *p*-toluenesulfonic acid monohydrate (7.7 mg, 0.04 mmol, 0.2 eq) in a degassed EtOH/ $\text{H}_2\text{O}$  mixture (95:5 v/v, 2 ml) was heated to reflux overnight. The reaction mixture was cooled to RT, the solvent was removed under vacuum and the residue was filtered through a plug of silica gel (5 cm, DCM: EtOAc 9:1 (degassed), 2 ml). After removal of the solvent the ligand was obtained as a colorless solid.

A solution of  $(R,R)$ -DIOP-Diol (obtained from above, 1.0 eq), cyclopentanone (2 mL) and *p*-toluenesulfonic acid monohydrate (7.7 mg, 0.04 mmol, 0.2 eq) in toluene (15 ml) connected with a Dean Stark condenser was heated to reflux overnight. The reaction mixture was cooled to RT, washed with  $\text{H}_2\text{O}$  (50 ml), dried over  $\text{Na}_2\text{SO}_4$  and the solvent removed under vacuum. After recrystallization from EtOH the ligand was obtained as a white solid (yield: 50%). (Note: directly combination of DIOP with cyclopentanone in the presence of PTSA could not afford pure product because it is difficult to separate the  $(R,R)$ -Cy-DIOP from the unreacted  $(R,R)$ -DIOP)

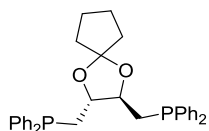

**(*R,R*)-Cy-DIOP<sup>8</sup> (10m)**

White solid,  $R_f = 0.5$  (Hex/EA = 10/1)

$^1\text{H}$  NMR (400 MHz,  $\text{CDCl}_3$ )  $\delta$  7.46 – 7.34 (m, 8H), 7.33 – 7.27 (m, 12H), 3.88 (m<sub>c</sub>, 2H), 2.46 – 2.24 (m, 4H), 1.80-1.65 (m, 4H), 1.60-1.50 (m, 4H).

$^{31}\text{P}$  NMR (162 MHz,  $\text{CDCl}_3$ )  $\delta$  -23.21.

$^{13}\text{C}$  NMR (101 MHz,  $\text{CDCl}_3$ )  $\delta$  138.3 (dd,  $J = 23.4, 12.8$  Hz), 132.8 (dd,  $J = 19.4, 17.3$  Hz), 128.6 (d,  $J = 14.1$  Hz), 128.4 (t,  $J = 7.2$  Hz), 118.7, 79.6 (dd,  $J = 15.7, 7.3$  Hz), 38.3, 37.4, 32.6 (dd,  $J = 15.6, 3.3$  Hz), 23.4, 23.2.

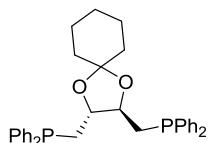

**(*R,R*)-c-Hex-DIOP<sup>8</sup> (10n)**

White solid,  $R_f = 0.5$  (Hex/EA = 10/1)

$^1\text{H}$  NMR (400 MHz,  $\text{CDCl}_3$ )  $\delta$  7.52 – 7.25 (m, 20H), 3.95 (dt,  $J = 6.9, 5.0$  Hz, 2H), 2.45 – 2.29 (m, 4H), 1.55 – 1.24 (m, 10H).

$^{31}\text{P}$  NMR (162 MHz,  $\text{CDCl}_3$ )  $\delta$  -22.6.

$^{13}\text{C}$  NMR (101 MHz,  $\text{CDCl}_3$ )  $\delta$  138.6 (t,  $J = 12.7$  Hz), 132.9 (dd,  $J = 19.3, 7.3$  Hz), 128.6 (d,  $J = 11.1$  Hz), 128.4 (t,  $J = 7.1$  Hz), 109.4, 79.3 (dd,  $J = 14.9, 8.1$  Hz), 36.8, 32.4 (dd,  $J = 15.7, 3.1$  Hz), 25.1, 23.7.

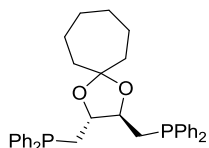

**(*R,R*)-c-Hep-DIOP<sup>8</sup> (10o)**

White solid,  $R_f = 0.5$  (Hex/EA = 10/1)

$^1\text{H}$  NMR (400 MHz,  $\text{CDCl}_3$ )  $\delta$  7.49 – 7.37 (m, 8H), 7.36-7.27 (m, 12H), 3.89 (q,  $J = 5.5$  Hz, 2H), 2.38 (qd,  $J = 13.7, 4.8$  Hz, 4H), 1.87 – 1.64 (m, 4H), 1.59 (m<sub>c</sub>, 2H), 1.43 (t,  $J = 10.5$  Hz, 6H).

$^{31}\text{P}$  NMR (162 MHz,  $\text{CDCl}_3$ )  $\delta$  -22.6.

$^{13}\text{C}$  NMR (101 MHz, Chloroform-*d*)  $\delta$  138.5 (dd,  $J = 15.9, 12.7$  Hz), 132.8 (dd,  $J = 19.3, 10.4$  Hz), 128.5 (d,  $J = 12.1$  Hz), 128.3 (t,  $J = 6.8$  Hz), 113.0, 79.0 (dd,  $J = 15.0, 7.7$  Hz), 39.9, 32.0 (dd,  $J = 15.8, 3.4$  Hz), 28.9, 22.2.

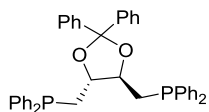

**(*R,R*)-diPhenyl-DIOP<sup>9</sup> (10p)**

White solid,  $R_f = 0.5$  (Hex/EA = 10/1)

$^1\text{H}$  NMR (400 MHz,  $\text{CDCl}_3$ )  $\delta$  7.53 – 7.07 (m, 30H), 4.05 (m<sub>c</sub>, 2H), 2.52 – 2.28 (m, 4H).

$^{31}\text{P}$  NMR (162 MHz,  $\text{CDCl}_3$ )  $\delta$  -21.8.

$^{13}\text{C}$  NMR (101 MHz,  $\text{CDCl}_3$ )  $\delta$  143.5 , 138.3 (dd,  $J$  = 23.0, 12.8 Hz), 132.9 (dd,  $J$  = 24.9, 19.4 Hz), 128.7 , 128.4 (t,  $J$  = 6.9 Hz), 127.9 , 127.6 , 125.8 , 81.0 (dd,  $J$  = 15.9, 7.7 Hz), 31.9 (dd,  $J$  = 16.3, 2.6 Hz).

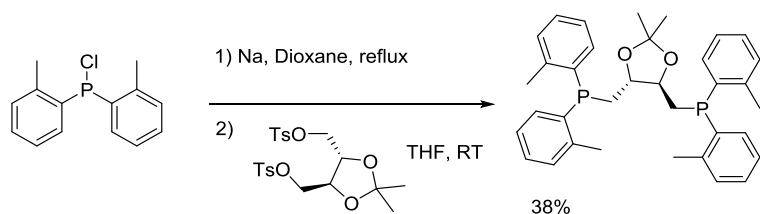

DIOP analogs were prepared using Kagan's method.<sup>10</sup>

To a dried flask was added chlorodi-*o*-tolylphosphane (686697 ALDRICH) (1.000 g, 4 mmol, 1 equiv), sodium (368 mg, 16 mmol, 4 equiv) and dioxane (10 mL). The mixture stirred at reflux under argon atmosphere for 3 hours. After the color became orange, the mixture was cooled to room temperature. A solution of (-)-1,4-di-O-tosyl-2,3-O-isopropylidene-L-threitol (226297 ALDRICH) (250 mg, 0.5 mmol) in THF (10 mL) was added dropwise into the system. After stirring overnight, the reaction was quenched with degassed water and filtered through a short pad of silica gel under argon atmosphere. Flash column chromatography under argon afforded the product (yield, 38%) (eluent 5:1 hexanes: EtOAc (degassed)).

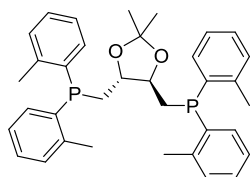

(*R,R*)-*o*-Me-DIOP<sup>8</sup> (**10k**)

Colorless oil,  $R_f$  = 0.5 (Hex/EA = 10/1)

$^1\text{H}$  NMR (400 MHz,  $\text{CDCl}_3$ )  $\delta$  7.32 – 7.11 (m, 16H), 3.87 – 3.74 (m, 2H), 2.50 (s, 6H), 2.32 (s, 6H), 2.29 – 2.19 (m, 4H), 1.36 (s, 6H).

$^{31}\text{P}$  NMR (162 MHz,  $\text{CDCl}_3$ )  $\delta$  -44.3.

$^{13}\text{C}$  NMR (101 MHz,  $\text{CDCl}_3$ )  $\delta$  143.1 – 141.1 (m), 136.4 (dd,  $J$  = 16.1, 13.3 Hz), 131.7 , 130.7 , 130.0 (dd,  $J$  = 16.1, 5.1 Hz), 128.5 (d,  $J$  = 25.6 Hz), 126.0 (d,  $J$  = 28.0 Hz), 108.8 , 79.7 (dd,  $J$  = 14.3, 7.0 Hz), 31.6 , 31.1 (dd,  $J$  = 15.7, 3.5 Hz), 27.2 , 22.7 , 21.4 (d,  $J$  = 22.2 Hz), 21.1 (d,  $J$  = 21.1 Hz).

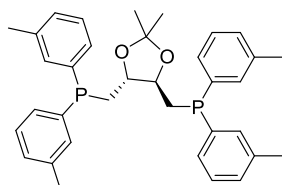

(*R,R*)-*m*-Me-DIOP<sup>11</sup> (**10l**)

Colorless oil,  $R_f$  = 0.5 (Hex/EA = 10/1)

$^1\text{H}$  NMR (400 MHz,  $\text{CDCl}_3$ )  $\delta$  7.34 – 7.02 (m, 16H), 3.87 (m<sub>c</sub>, 2H), 2.31 (m<sub>c</sub>, 16H, 4\*CH<sub>3</sub>+CH<sub>2</sub>), 1.36 (s, 6H).

$^{31}\text{P}$  NMR (162 MHz,  $\text{CDCl}_3$ )  $\delta$  -23.7.

$^{13}\text{C}$  NMR (101 MHz,  $\text{CDCl}_3$ )  $\delta$  138.4 (d,  $J = 12.4$  Hz), 138.1 – 137.7 (m), 133.5 (dd,  $J = 46.9, 20.8$  Hz), 128.3 (dd,  $J = 9.6, 6.8$  Hz), 108.7, 79.7 (dd,  $J = 14.8, 7.3$  Hz), 32.2 (dd,  $J = 15.6, 3.6$  Hz), 27.2, 21.4.

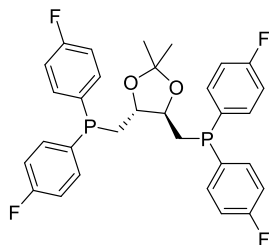

(*R,R*)-*p*-F-DIOP<sup>12</sup> (**10c**)

Colorless solid,  $R_f = 0.45$  (Hex/EA = 10/1)

$^1\text{H}$  NMR (400 MHz,  $\text{CDCl}_3$ )  $\delta$  7.48 – 7.29 (m, 8H), 7.02 (t,  $J = 8.5$  Hz, 8H), 3.90 (q,  $J = 5.9$  Hz, 2H), 2.43 – 2.17 (m, 5H), 1.34 (s, 7H).

$^{13}\text{C}$  NMR (101 MHz,  $\text{CDCl}_3$ )  $\delta$  163.3 (dd,  $J = 249.2, 8.3$  Hz), 134.6 (ddd,  $J = 26.2, 21.0, 8.0$  Hz), 133.5 (dt,  $J = 13.1, 4.0$  Hz), 115.7 (ddd,  $J = 20.9, 7.6, 5.4$  Hz), 109.0, 79.2 (dd,  $J = 14.5, 8.2$  Hz), 32.6 (dd,  $J = 15.4, 3.3$  Hz), 27.2.

$^{19}\text{F}$  NMR (376 MHz,  $\text{CDCl}_3$ )  $\delta$  -112.1 (dtt,  $J = 96.5, 9.4, 4.7$  Hz).

$^{31}\text{P}$  NMR (162 MHz,  $\text{CDCl}_3$ )  $\delta$  -25.5.

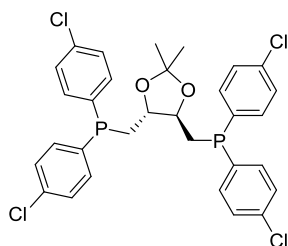

(*R,R*)-*p*-Cl-DIOP (**10b**)

White solid,  $R_f = 0.4$  (Hex/EA = 10/1)

$^1\text{H}$  NMR (400 MHz,  $\text{CDCl}_3$ )  $\delta$  7.38 – 7.19 (m, 16H), 3.89 (q,  $J = 5.4$  Hz, 2H), 2.29 (t,  $J = 5.2$  Hz, 4H), 1.33 (s, 6H).

$^{31}\text{P}$  NMR (162 MHz,  $\text{CDCl}_3$ )  $\delta$  -24.8.

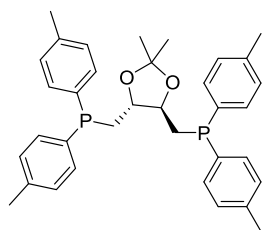

(*R,R*)-*p*-Me-DIOP<sup>13</sup> (**10d**)

White solid,  $R_f = 0.5$  (Hex/EA = 10/1)

$^1\text{H}$  NMR (400 MHz,  $\text{CDCl}_3$ )  $\delta$  7.44 – 7.29 (m, 8H), 7.21-7.10 (m, 8H), 3.90 (m, 2H), 2.48 – 2.25 (m, 16H), 1.40 (s, 6H).

$^{31}\text{P}$  NMR (162 MHz,  $\text{CDCl}_3$ )  $\delta$  -25.6.

$^{13}\text{C}$  NMR (101 MHz,  $\text{CDCl}_3$ )  $\delta$  138.5 (d,  $J = 26.1$  Hz), 135.1 (dd,  $J = 38.5, 11.7$  Hz), 132.8 (dd,  $J = 40.5, 19.5$  Hz), 129.6 – 128.4 (m), 108.7, 79.6 (dd,  $J = 14.7, 7.3$  Hz), 32.4 (dd,  $J = 15.3, 3.4$  Hz), 27.3, 21.3 (d,  $J = 3.4$  Hz).

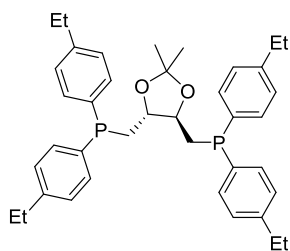

**(*R,R*)-*p*-Et-DIOP (10e)**

Colorless oil,  $R_f = 0.5$  (Hex/EA = 10/1)

$^1\text{H}$  NMR (400 MHz,  $\text{CDCl}_3$ )  $\delta$  7.41 – 7.29 (m, 8H), 7.21 – 7.07 (m, 8H), 3.86 (q,  $J = 5.3$  Hz, 2H), 2.63 (qd,  $J = 7.6, 2.8$  Hz, 8H), 2.40 (dd,  $J = 14.0, 4.3$  Hz, 2H), 2.32 – 2.20 (m, 2H), 1.34 (s, 6H), 1.22 (td,  $J = 7.7, 1.4$  Hz, 12H).

$^{31}\text{P}$  NMR (162 MHz,  $\text{CDCl}_3$ )  $\delta$  -25.7.

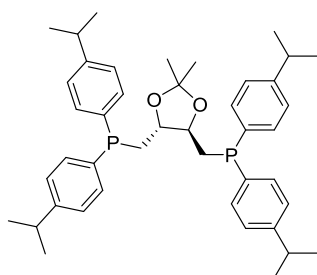

**(*R,R*)-*p*-iPr-DIOP (10f)**

Colorless oil,  $R_f = 0.5$  (Hex/EA = 10/1)

$^1\text{H}$  NMR (400 MHz,  $\text{CDCl}_3$ )  $\delta$  7.34 (dt,  $J = 18.2, 7.7$  Hz, 8H), 7.16 (t,  $J = 6.9$  Hz, 8H), 3.86 (dt,  $J = 6.9, 4.9$  Hz, 2H), 2.87 (pd,  $J = 6.9, 2.6$  Hz, 4H), 2.40 (dd,  $J = 14.0, 4.2$  Hz, 2H), 2.33 – 2.22 (m, 2H), 1.33 (s, 6H), 1.22 (d,  $J = 6.9$  Hz, 24H).

$^{31}\text{P}$  NMR (162 MHz,  $\text{CDCl}_3$ )  $\delta$  -25.8.

$^{13}\text{C}$  NMR (101 MHz,  $\text{CDCl}_3$ )  $\delta$  149.3 (d,  $J = 22.7$  Hz), 135.3 (dd,  $J = 48.1, 11.6$  Hz), 132.8 (dd,  $J = 37.0, 19.5$  Hz), 128.6 (d,  $J = 81.3$  Hz), 126.5 (t,  $J = 7.8$  Hz), 108.6, 79.7 (dd,  $J = 15.0, 7.3$  Hz), 33.9, 32.5 (dd,  $J = 15.1, 3.3$  Hz), 27.2, 23.8.

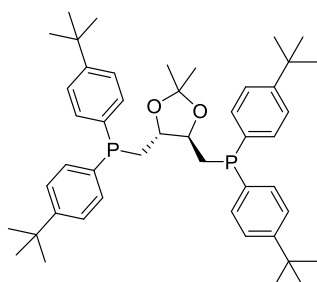

**(*R,R*)-*p*-tBu-DIOP (10g)**

White solid,  $R_f = 0.5$  (Hex/EA = 10/1)

$^1\text{H}$  NMR (400 MHz,  $\text{CDCl}_3$ )  $\delta$  7.43 – 7.29 (m, 16H), 3.88 (dt,  $J = 7.1, 5.0$  Hz, 2H), 2.50 – 2.39 (m, 2H), 2.36 – 2.23 (m, 2H), 1.35 (s, 6H), 1.30 (s, 36H).

$^{31}\text{P}$  NMR (162 MHz,  $\text{CDCl}_3$ )  $\delta$  -26.6.

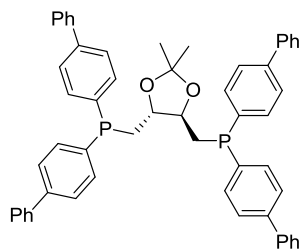

**(*R,R*)-*p*-Ph-DIOP (**10h**)**

White solid,  $R_f = 0.4$  (Hex/EA = 10/1)

$^1\text{H}$  NMR (400 MHz,  $\text{CDCl}_3$ )  $\delta$  7.94 – 7.29 (m, 36H), 4.02 (q,  $J = 5.4$  Hz, 2H), 2.62 – 2.33 (m, 4H), 1.57 (s, 6H).

$^{31}\text{P}$  NMR (162 MHz,  $\text{CDCl}_3$ )  $\delta$  -24.9.

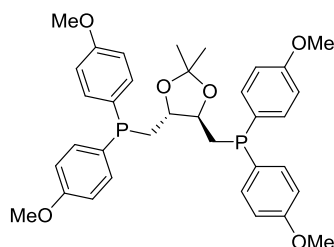

**(*R,R*)-*p*-MeO-DIOP<sup>8</sup> (**10i**)**

White solid,  $R_f = 0.4$  (Hex/EA = 5/1)

$^1\text{H}$  NMR (400 MHz,  $\text{CDCl}_3$ )  $\delta$  7.40-7.29 (m, 8H), 6.89-6.80 (m, 8H), 3.88-3.76 (m, 14H), 2.35 (dd,  $J = 13.7, 4.2$  Hz, 2H), 2.23 (ddd,  $J = 13.8, 6.9, 2.0$  Hz, 2H), 1.34 (s, 6H).

$^{31}\text{P}$  NMR (162 MHz,  $\text{CDCl}_3$ )  $\delta$  -27.2.

The analytical data of the compound was in complete agreement with the literature.<sup>8</sup>

## Computational Methods

All DFT calculations were performed using the Gaussian 09 software package.<sup>14</sup> The M06L<sup>15</sup> density functional and a mixed basis set of SDD for Rh and 6-31G(d) basis set for other atoms were used in geometry optimizations. After multiple attempts, the radical recombination transition states (*R*)- and (*S*)-**26-TS** could not be located using M06L. Thus, the geometries of (*R*)- and (*S*)-**26-TS** were optimized with B3LYP<sup>16</sup> and SDD(Rh) and 6-31G(d) basis sets instead. Single-point energies were calculated with M06 and a mixed basis set of SDD for Rh and 6-311+G(d,p) for other atoms. Solvation energy corrections were calculated using the SMD<sup>17</sup> model and toluene as solvent. All open-shell transition state structures (**17-TS**, **23-TS**, and **26-TS**) were optimized with unrestricted DFT methods, while closed-shell transition state structures (**24-TS**, **25-TS**, and **27-TS**) were optimized with restricted DFT methods. Wave function stability tests were performed for all open-shell structures to ensure the lowest-energy wavefunction was obtained.

## Computational Analysis on Factors that Favor the Radical Mechanism over the Closed-Shell Pathways

In Figure 6 we compared the activation energies of the radical and closed-shell pathways in the bromination of styrene with  $[(-)\text{-DIOP}]\text{RhCl}$  as the active catalyst. In the initial step of the catalytic cycle that involves reaction of  $\text{Br-CCl}_3$  with the Rh(I) catalyst, the open-shell Br atom abstraction transition state (**23-TS**) has much lower activation energy than two closed-shell  $\text{Br-CCl}_3$  oxidative addition transition states (**24-TS** and **25-TS**). As shown in Figure S3, the closed-shell **24-TS** and **25-TS** are destabilized due to the unfavorable steric repulsions between the  $\text{CCl}_3$  groups and the Rh catalyst as evidenced by the short distances between Cl in the  $\text{CCl}_3$  group and nearby H atoms in the catalyst. Similarly, in the enantioselectivity-determining C-Br bond formation step, the open-shell Br atom transfer transition states (**17-TS**) are favored over three-centered closed-shell reductive elimination transition states (**27-TS**) by approximately 7 kcal/mol. The three-centered closed-shell transition states (**27-TS**) are disfavored by close steric contacts between the catalyst and the benzyl group on the substrate (Figure S4).

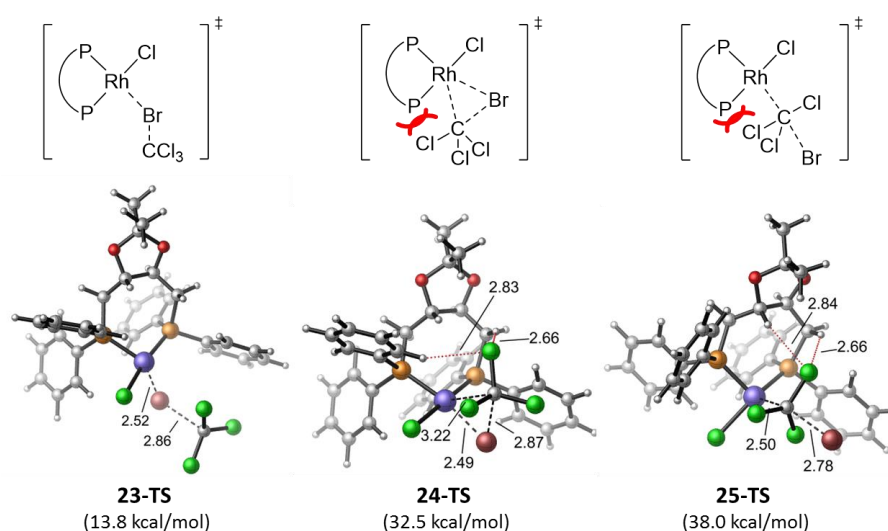

**Figure S3.** Radical *versus* closed-shell transition states in the reaction of  $\text{CBrCl}_3$  with the Rh(I) catalyst. Unfavorable steric repulsions are highlighted using red dashed lines. Gibbs free energies of activation are provided with respect to intermediates **16** and **2a**.

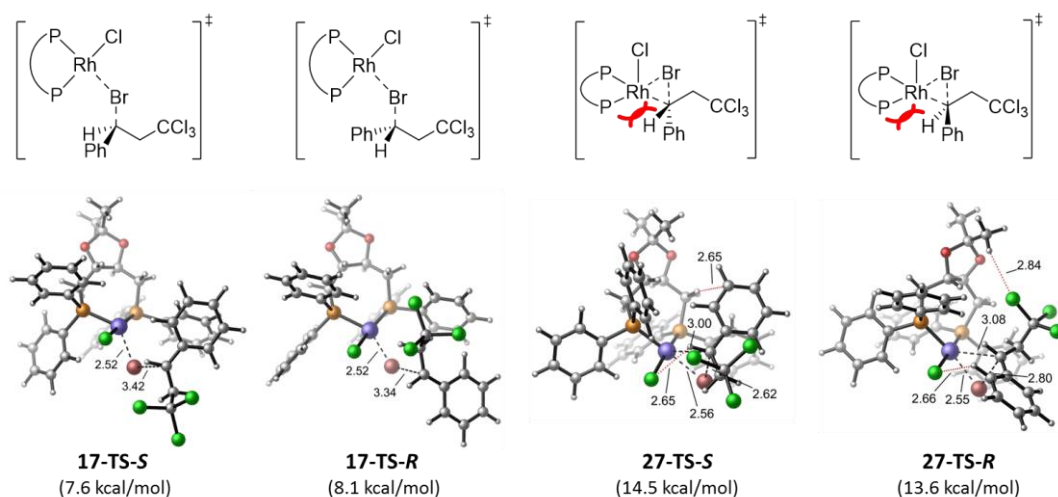

**Figure S4.** Radical *versus* closed-shell transition states in the C–Br bond formation step. Unfavorable steric repulsions are highlighted using red dashed lines. Gibbs free energies of activation are provided with respect to intermediates **16** and **2a**.

#### Chain-Transfer *versus* Bromine Atom Transfer Pathways from (DIOP)Rh(II)ClBr

In the classical Kharash reaction, the C–Br bond formation step involves Br atom abstraction from Br–CX<sub>3</sub> via a chain-transfer transition state (**TS-A**) that leads to racemic benzyl bromide products as shown in Figure 1 in the main text. In the Rh-catalyzed enantioselective Br–CX<sub>3</sub> radical addition reaction, the chain-transfer pathway via **TS-A** is an undesired side reaction that would decrease the *ee*. Our DFT calculations indicate that the chain-transfer transition state **TS-A** requires > 12 kcal/mol higher activation energy than the Br atom transfer from LRh(II)ClBr (**17-TS**). It is interesting to note that the chain transfer TS (**TS-A**) has an almost linear geometry along the two breaking/forming bonds. On the other hand, **17-TS** is bent and allows much stronger substrate-catalyst interaction that induces enantioselectivity.

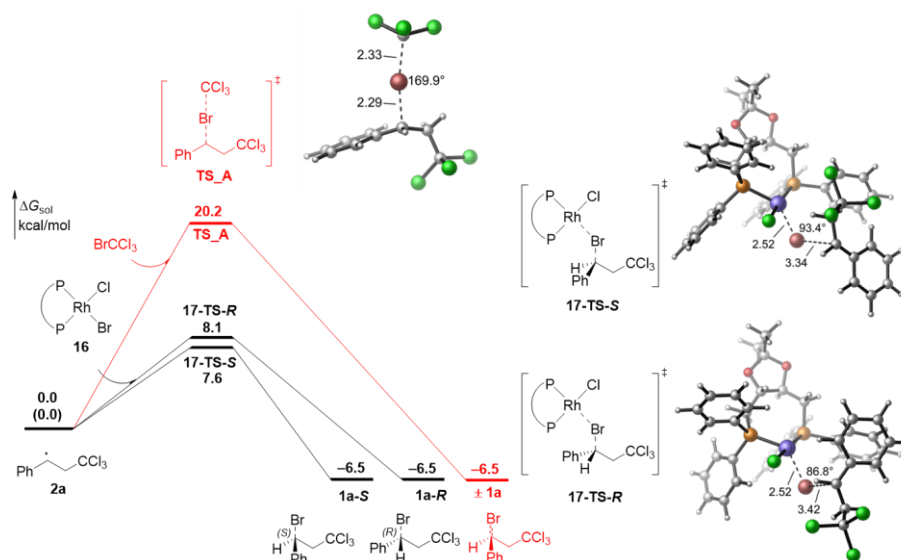

**Figure S5.** Competing pathways in the C–Br bond formation step.



## Conformational Search for the Enantioselectivity-Determining Br Atom Abstraction Transition State (17-TS)

According to the computed reaction pathway depicted in Figure 6, the Br atom abstraction from the Rh(II) complex (**17-TS**) is the enantioselectivity-determining step. Careful conformational search was performed for the diastereomeric transition states **17-TS-R** and **17-TS-S** that lead to the (*R*)- and (*S*)-products, respectively. Rotamers about the breaking Rh–Br bond ( $\varphi_1$ ) and the forming Br–C bond ( $\varphi_2$ ) were systematically considered. Figures S6 and S7 show representative isomers of **17-TS**. First of all, the Br atom that attacks the benzylic radical may be placed either below the plane of Rh–P–P–Cl (referred to as “Br-down” attack) or above the plane (referred to as “Br-up” attack). In general, the “Br-down” transition states have lower activation energies than “Br-up” ones (e.g. **17-TS-S** vs **17-TS-S4** and **17-TS-R** vs **17-TS-R4**). In the “Br-down” attack, the Br atom and the benzylic radical substrate are placed in the unoccupied bottom-right quadrant that avoids unfavorable steric repulsions with the catalyst (Figure S8). In the “Br-up” transition states, the Br atom is placed in the occupied top-right quadrant. Among “Br-down” transition states, T-shaped  $\pi/\pi$  interaction between Ph on the benzylic radical and one of the Ph groups on the DIOP ligand contributes to the stability of **17-TS-S** compared to **17-TS-R**. T-shaped  $\pi/\pi$  interaction is also observed in **17-TS-R2**. However, **17-TS-R2** is destabilized due to repulsion between the  $\text{CH}_2\text{CCl}_3$  group on benzylic radical and the catalyst. Interestingly, transition state isomers with parallel  $\pi/\pi$  interaction are typically less favored than those with T-shaped  $\pi/\pi$  interaction (**17-TS-S3** vs **17-TS-S** and **17-TS-R3** vs **17-TS-R2**). Additionally, the most stable *R*-isomer **17-TS-R** is stabilized by the C–H $\cdots\pi$  interaction between the  $\text{CH}_2$  group on benzylic radical and one of the Ph groups on the DIOP ligand. The partial positive charge induced by the adjacent electron-withdrawing  $\text{CCl}_3$  group promotes such C–H $\cdots\pi$  interaction. This favored C–H $\cdots\pi$  interaction can also explain the relatively low activation energy of **17-TS-S2**.

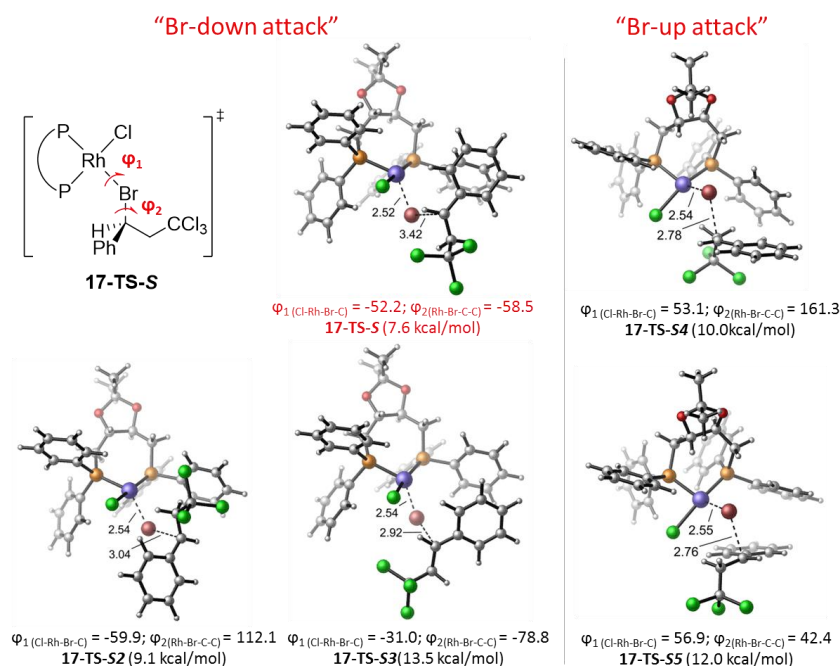

**Figure S6.** Isomers of the enantioselectivity-determining Br-atom abstraction transition state **17-TS-S**. Gibbs free energies of activation are provided with respect to intermediates **16** and **2a**.

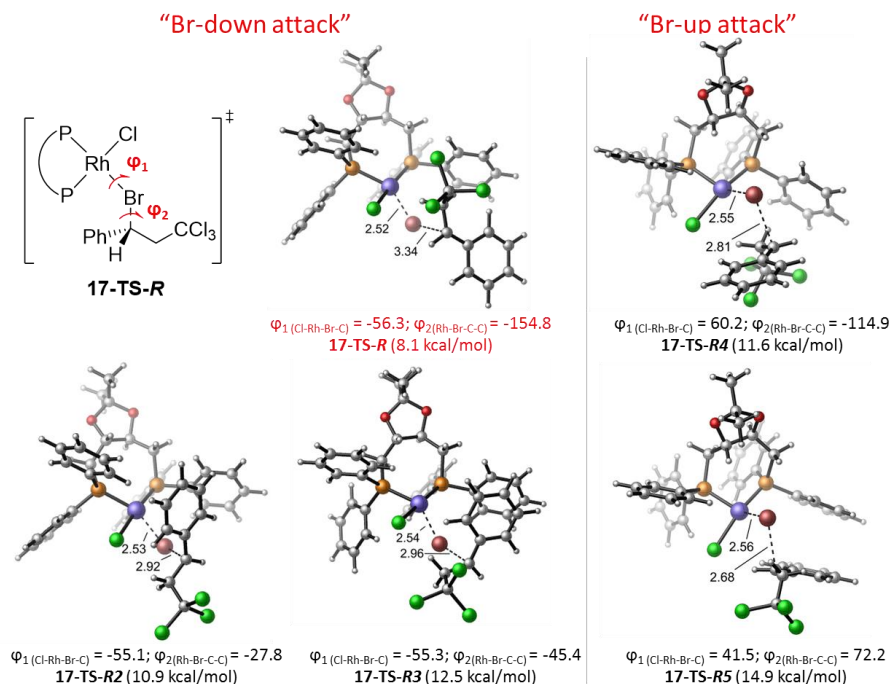

**Figure S7.** Isomers of the enantioselectivity-determining Br-atom abstraction transition state **17-TS-R**. Gibbs free energies of activation are provided with respect to intermediates **16** and **2a**.

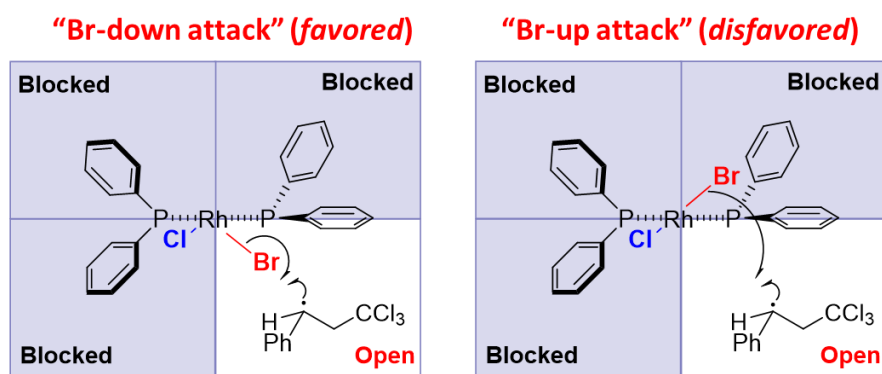

**Figure S8.** Quadrant diagram of Br atom abstraction TS (**17-TS**) with (-)-DIOP ligand.

## Cartesian Coordinates of Optimized Structures

### BrCCl3

M06L SCF energy: -3989.82022237 a.u.  
M06L enthalpy: -3989.804668 a.u.  
M06L free energy: -3989.842483 a.u.  
M06 SCF energy in solution: -3992.65794300 a.u.  
M06 enthalpy in solution: -3992.642389 a.u.  
M06 free energy in solution: -3992.680204 a.u.

#### Cartesian coordinates

| ATOM | X         | Y         | Z         |
|------|-----------|-----------|-----------|
| C    | 0.000000  | 0.000000  | -0.421745 |
| Cl   | 0.000000  | 1.676362  | -1.006384 |
| Cl   | -1.451772 | -0.838181 | -1.006384 |
| Cl   | 1.451772  | -0.838181 | -1.006384 |
| Br   | 0.000000  | 0.000000  | 1.538744  |

### CCl3\_radical

M06L SCF energy: -1418.55492070 a.u.  
M06L enthalpy: -1418.542301 a.u.  
M06L free energy: -1418.576427 a.u.  
M06 SCF energy in solution: -1418.59280895 a.u.  
M06 enthalpy in solution: -1418.580189 a.u.  
M06 free energy in solution: -1418.614315 a.u.

#### Cartesian coordinates

| ATOM | X         | Y         | Z         |
|------|-----------|-----------|-----------|
| C    | 0.000000  | 0.000000  | 0.284053  |
| Cl   | 0.000000  | 1.688926  | -0.033418 |
| Cl   | -1.462653 | -0.844463 | -0.033418 |
| Cl   | 1.462653  | -0.844463 | -0.033418 |

### Styrene

M06L SCF energy: -309.59449453 a.u.  
M06L enthalpy: -309.453158 a.u.  
M06L free energy: -309.491700 a.u.  
M06 SCF energy in solution: -309.47750708 a.u.  
M06 enthalpy in solution: -309.336171 a.u.  
M06 free energy in solution: -309.374713 a.u.

#### Cartesian coordinates

| ATOM | X | Y | Z |
|------|---|---|---|
|------|---|---|---|

|   |           |           |           |
|---|-----------|-----------|-----------|
| C | -1.778891 | -1.039474 | 0.000010  |
| C | -0.409417 | -1.280868 | -0.000001 |
| C | 0.514943  | -0.226309 | -0.000009 |
| C | 0.016112  | 1.086023  | -0.000013 |
| C | -1.349865 | 1.329010  | -0.000003 |
| C | -2.255275 | 0.267741  | 0.000009  |
| H | -2.475626 | -1.876283 | 0.000016  |
| H | -0.038244 | -2.306373 | -0.000001 |
| H | 0.709299  | 1.926222  | -0.000028 |
| H | -1.714387 | 2.355148  | -0.000007 |
| H | -3.326479 | 0.461767  | 0.000016  |
| C | 1.944267  | -0.533604 | -0.000019 |
| C | 2.961392  | 0.335909  | 0.000023  |
| H | 2.179840  | -1.600959 | -0.000061 |
| H | 3.993151  | -0.004699 | 0.000011  |
| H | 2.812855  | 1.414609  | 0.000074  |

### 1a-R

|                              |                     |
|------------------------------|---------------------|
| M06L SCF energy:             | -4299.47356972 a.u. |
| M06L enthalpy:               | -4299.311908 a.u.   |
| M06L free energy:            | -4299.368377 a.u.   |
| M06 SCF energy in solution:  | -4302.19506785 a.u. |
| M06 enthalpy in solution:    | -4302.033406 a.u.   |
| M06 free energy in solution: | -4302.089875 a.u.   |

### Cartesian coordinates

| ATOM | X         | Y         | Z         |
|------|-----------|-----------|-----------|
| Br   | -1.403141 | 2.458637  | -0.033622 |
| C    | -0.431836 | 0.775603  | 0.408360  |
| C    | -1.323177 | -0.403911 | 0.192996  |
| C    | 0.849599  | 0.813159  | -0.421079 |
| H    | -0.194017 | 0.888575  | 1.469746  |
| C    | -1.624984 | -1.245178 | 1.264743  |
| C    | -1.819381 | -0.712082 | -1.077603 |
| H    | 0.621149  | 0.705266  | -1.488660 |
| H    | 1.327538  | 1.790300  | -0.291594 |
| C    | 1.912301  | -0.229702 | -0.079160 |
| C    | -2.389686 | -2.391529 | 1.067164  |
| H    | -1.239410 | -1.008542 | 2.256884  |
| C    | -2.581227 | -1.854446 | -1.275522 |
| H    | -1.611725 | -0.042357 | -1.912829 |
| Cl   | 1.410389  | -1.890355 | -0.491259 |
| Cl   | 2.316308  | -0.158903 | 1.670741  |
| Cl   | 3.383890  | 0.169049  | -1.026484 |

|   |           |           |           |
|---|-----------|-----------|-----------|
| C | -2.864778 | -2.700816 | -0.203000 |
| H | -2.613540 | -3.043381 | 1.909426  |
| H | -2.959505 | -2.087654 | -2.269097 |
| H | -3.461535 | -3.597511 | -0.359452 |

### 1a-S

|                              |                     |
|------------------------------|---------------------|
| M06L SCF energy:             | -4299.47356957 a.u. |
| M06L enthalpy:               | -4299.311908 a.u.   |
| M06L free energy:            | -4299.368371 a.u.   |
| M06 SCF energy in solution:  | -4302.19506696 a.u. |
| M06 enthalpy in solution:    | -4302.033405 a.u.   |
| M06 free energy in solution: | -4302.089868 a.u.   |

### Cartesian coordinates

| ATOM | X         | Y         | Z         |
|------|-----------|-----------|-----------|
| Br   | 1.403625  | 2.458342  | -0.033528 |
| C    | 0.431798  | 0.775600  | 0.408299  |
| H    | 0.193882  | 0.888606  | 1.469655  |
| C    | -0.849544 | 0.813326  | -0.421292 |
| H    | -0.621074 | 0.705174  | -1.488842 |
| H    | -1.327371 | 1.790527  | -0.292061 |
| C    | -1.912418 | -0.229281 | -0.079148 |
| Cl   | -3.383780 | 0.168834  | -1.027145 |
| Cl   | -1.410343 | -1.890288 | -0.490318 |
| Cl   | -2.316737 | -0.157899 | 1.670470  |
| C    | 1.322986  | -0.404029 | 0.192987  |
| C    | 1.624371  | -1.245574 | 1.264631  |
| C    | 1.819471  | -0.712045 | -1.077545 |
| C    | 2.389030  | -2.391956 | 1.067064  |
| H    | 1.238460  | -1.009087 | 2.256688  |
| C    | 2.581242  | -1.854449 | -1.275481 |
| H    | 1.612129  | -0.042177 | -1.912742 |
| C    | 2.864446  | -2.701040 | -0.203031 |
| H    | 2.612595  | -3.043997 | 1.909258  |
| H    | 2.959724  | -2.087554 | -2.269004 |
| H    | 3.461120  | -3.597795 | -0.359504 |

### 2a

|                             |                     |
|-----------------------------|---------------------|
| M06L SCF energy:            | -1728.20129231 a.u. |
| M06L enthalpy:              | -1728.044682 a.u.   |
| M06L free energy:           | -1728.097635 a.u.   |
| M06 SCF energy in solution: | -1728.12867374 a.u. |
| M06 enthalpy in solution:   | -1727.972063 a.u.   |

M06 free energy in solution: -1728.025016 a.u.

Cartesian coordinates

| ATOM | X         | Y         | Z         |
|------|-----------|-----------|-----------|
| C    | -4.039858 | 0.857464  | 0.201986  |
| C    | -2.775441 | 1.315718  | -0.116027 |
| C    | -1.720756 | 0.416626  | -0.433588 |
| C    | -2.018593 | -0.972376 | -0.401565 |
| C    | -3.287916 | -1.420688 | -0.082893 |
| C    | -4.309114 | -0.514663 | 0.218596  |
| H    | -4.827988 | 1.569595  | 0.440682  |
| H    | -2.566623 | 2.385446  | -0.128181 |
| H    | -1.232391 | -1.696415 | -0.610203 |
| H    | -3.489619 | -2.490362 | -0.063086 |
| H    | -5.304854 | -0.875176 | 0.469482  |
| C    | -0.449701 | 0.935850  | -0.764843 |
| C    | 0.740462  | 0.142534  | -1.161439 |
| H    | -0.319496 | 2.017402  | -0.719621 |
| H    | 0.476927  | -0.868039 | -1.496311 |
| H    | 1.270563  | 0.626671  | -1.993409 |
| C    | 1.780968  | -0.028379 | -0.049320 |
| Cl   | 1.076850  | -0.918885 | 1.331410  |
| Cl   | 2.355203  | 1.574171  | 0.513024  |
| Cl   | 3.184016  | -0.953029 | -0.689421 |

**14-R**

M06L SCF energy: -6903.93827992 a.u.  
M06L enthalpy: -6903.180472 a.u.  
M06L free energy: -6903.316179 a.u.  
M06 SCF energy in solution: -6906.15953070 a.u.  
M06 enthalpy in solution: -6905.401723 a.u.  
M06 free energy in solution: -6905.537430 a.u.

Cartesian coordinates

| ATOM | X        | Y         | Z         |
|------|----------|-----------|-----------|
| H    | 1.766828 | -2.300857 | 1.189842  |
| C    | 0.928608 | -2.626918 | 0.560509  |
| H    | 0.598116 | -3.604451 | 0.935296  |
| C    | 1.391259 | -2.788729 | -0.880700 |
| H    | 0.701515 | -2.289055 | -1.578566 |
| C    | 2.816774 | -2.312393 | -1.184110 |
| C    | 2.938636 | -0.880506 | -1.674734 |
| H    | 2.333211 | -0.772520 | -2.581912 |
| H    | 3.985432 | -0.670376 | -1.933666 |

|   |           |           |           |
|---|-----------|-----------|-----------|
| P | -0.464221 | -1.437938 | 0.788533  |
| P | 2.369087  | 0.393535  | -0.460528 |
| C | -0.705041 | -1.413348 | 2.594648  |
| C | -1.128224 | -1.253277 | 5.359258  |
| C | 0.157204  | -2.062278 | 3.482930  |
| C | -1.786269 | -0.685742 | 3.111265  |
| C | -2.002666 | -0.615641 | 4.479802  |
| C | -0.050884 | -1.974524 | 4.858516  |
| H | 1.002013  | -2.642704 | 3.117972  |
| H | -2.463519 | -0.170258 | 2.429461  |
| H | -2.847778 | -0.046825 | 4.862302  |
| H | 0.633546  | -2.480213 | 5.537496  |
| H | -1.288848 | -1.186098 | 6.433657  |
| C | -1.899892 | -2.407992 | 0.180567  |
| C | -4.037828 | -3.961563 | -0.768857 |
| C | -2.794543 | -3.017257 | 1.073378  |
| C | -2.085751 | -2.606337 | -1.196735 |
| C | -3.149421 | -3.372153 | -1.663204 |
| C | -3.850889 | -3.788099 | 0.599021  |
| H | -2.670383 | -2.892673 | 2.146191  |
| H | -1.419233 | -2.129064 | -1.911646 |
| H | -3.285371 | -3.495978 | -2.735872 |
| H | -4.536839 | -4.247389 | 1.308525  |
| H | -4.874734 | -4.552902 | -1.135829 |
| C | 2.933890  | 1.947836  | -1.224872 |
| C | 3.658205  | 4.401485  | -2.360090 |
| C | 2.951705  | 2.106091  | -2.616363 |
| C | 3.253421  | 3.040672  | -0.407292 |
| C | 3.618664  | 4.256646  | -0.974626 |
| C | 3.317570  | 3.326428  | -3.178035 |
| H | 2.671027  | 1.278209  | -3.265750 |
| H | 3.212528  | 2.933963  | 0.676859  |
| H | 3.871227  | 5.096580  | -0.329487 |
| H | 3.338406  | 3.434526  | -4.261146 |
| H | 3.949315  | 5.353044  | -2.802010 |
| C | 3.576080  | 0.123168  | 0.894990  |
| C | 5.471349  | -0.465036 | 2.873341  |
| C | 4.942297  | 0.326553  | 0.656291  |
| C | 3.175265  | -0.373793 | 2.138998  |
| C | 4.117276  | -0.669703 | 3.120704  |
| C | 5.882245  | 0.036765  | 1.639548  |
| H | 5.271803  | 0.724878  | -0.304024 |
| H | 2.114513  | -0.489662 | 2.354623  |
| H | 3.783449  | -1.047224 | 4.086579  |

|    |           |           |           |
|----|-----------|-----------|-----------|
| H  | 6.939636  | 0.204259  | 1.441959  |
| H  | 6.208377  | -0.688299 | 3.642854  |
| H  | 3.453042  | -2.468407 | -0.291714 |
| O  | 3.244159  | -3.188913 | -2.216731 |
| O  | 1.475523  | -4.174823 | -1.176560 |
| C  | 2.295813  | -4.265736 | -2.330466 |
| C  | 1.481262  | -4.071749 | -3.599798 |
| H  | 2.139718  | -4.060431 | -4.474721 |
| H  | 0.755213  | -4.884130 | -3.717804 |
| H  | 0.937866  | -3.119642 | -3.576939 |
| C  | 3.030683  | -5.584288 | -2.288996 |
| H  | 2.324174  | -6.419468 | -2.339470 |
| H  | 3.719812  | -5.659039 | -3.136036 |
| H  | 3.603422  | -5.660688 | -1.360319 |
| Rh | -0.035667 | 0.601878  | -0.124935 |
| Cl | -0.211635 | -0.094509 | -2.482842 |
| Br | 0.462744  | 1.646345  | 2.116674  |
| C  | -2.069602 | 1.326864  | -0.106715 |
| H  | -2.516794 | 1.206490  | 0.886725  |
| C  | -2.952389 | 0.764074  | -1.197250 |
| H  | -2.753484 | 1.253432  | -2.158358 |
| H  | -2.784286 | -0.306299 | -1.362116 |
| C  | -4.440881 | 0.904117  | -0.912319 |
| C  | -1.504421 | 2.674110  | -0.269196 |
| C  | -1.649421 | 3.648750  | 0.742752  |
| C  | -0.646616 | 2.974444  | -1.356226 |
| C  | -0.963679 | 4.844690  | 0.684486  |
| H  | -2.309325 | 3.430643  | 1.581321  |
| C  | 0.075957  | 4.172741  | -1.383220 |
| H  | -0.582528 | 2.293403  | -2.202550 |
| C  | -0.070453 | 5.100542  | -0.366122 |
| H  | -1.103204 | 5.585884  | 1.469804  |
| H  | 0.749942  | 4.368835  | -2.215812 |
| H  | 0.492843  | 6.032480  | -0.389448 |
| Cl | -5.374507 | 0.270616  | -2.310603 |
| Cl | -4.899828 | 2.612142  | -0.626935 |
| Cl | -4.890140 | -0.065668 | 0.541674  |

#### 14-S

|                             |                     |
|-----------------------------|---------------------|
| M06L SCF energy:            | -6903.94112544 a.u. |
| M06L enthalpy:              | -6903.183780 a.u.   |
| M06L free energy:           | -6903.319963 a.u.   |
| M06 SCF energy in solution: | -6906.16067929 a.u. |
| M06 enthalpy in solution:   | -6905.403334 a.u.   |



M06 free energy in solution: -6905.539517 a.u.

Cartesian coordinates

| ATOM | X         | Y         | Z         |
|------|-----------|-----------|-----------|
| H    | 1.698395  | -1.697043 | 1.696331  |
| C    | 1.337921  | -2.321206 | 0.867326  |
| H    | 1.244107  | -3.342295 | 1.259914  |
| C    | 2.327488  | -2.322833 | -0.295193 |
| H    | 1.808980  | -2.108863 | -1.248088 |
| C    | 3.549771  | -1.414345 | -0.200204 |
| C    | 3.366356  | -0.003337 | -0.722609 |
| H    | 2.975998  | -0.046217 | -1.746870 |
| H    | 4.339641  | 0.504192  | -0.748697 |
| P    | -0.320021 | -1.690874 | 0.378520  |
| P    | 2.200540  | 1.000978  | 0.308805  |
| C    | -1.416647 | -2.227419 | 1.730933  |
| C    | -3.160654 | -2.916372 | 3.807477  |
| C    | -0.970082 | -2.234530 | 3.058534  |
| C    | -2.747047 | -2.569549 | 1.458551  |
| C    | -3.615724 | -2.904940 | 2.492295  |
| C    | -1.835179 | -2.588988 | 4.086657  |
| H    | 0.053819  | -1.948609 | 3.293288  |
| H    | -3.109880 | -2.570932 | 0.431767  |
| H    | -4.650138 | -3.154824 | 2.263208  |
| H    | -1.475951 | -2.594212 | 5.113920  |
| H    | -3.838487 | -3.178472 | 4.617849  |
| C    | -0.818411 | -2.778801 | -1.003504 |
| C    | -1.706468 | -4.479107 | -3.044564 |
| C    | -0.177483 | -4.001653 | -1.235348 |
| C    | -1.903208 | -2.419507 | -1.810429 |
| C    | -2.354618 | -3.267907 | -2.812871 |
| C    | -0.615881 | -4.838472 | -2.259216 |
| H    | 0.681706  | -4.307224 | -0.642622 |
| H    | -2.388775 | -1.459054 | -1.659674 |
| H    | -3.204644 | -2.970913 | -3.424550 |
| H    | -0.097741 | -5.779401 | -2.437339 |
| H    | -2.047972 | -5.138524 | -3.840597 |
| C    | 2.490254  | 2.689161  | -0.330924 |
| C    | 2.888263  | 5.280083  | -1.320070 |
| C    | 2.567388  | 2.917809  | -1.710699 |
| C    | 2.573790  | 3.779579  | 0.544901  |
| C    | 2.778070  | 5.064735  | 0.051711  |
| C    | 2.769805  | 4.206244  | -2.198033 |
| H    | 2.451514  | 2.088117  | -2.407178 |

|    |           |           |           |
|----|-----------|-----------|-----------|
| H  | 2.494588  | 3.617435  | 1.619918  |
| H  | 2.855228  | 5.900544  | 0.745622  |
| H  | 2.834924  | 4.367377  | -3.273002 |
| H  | 3.055457  | 6.285045  | -1.704598 |
| C  | 3.158879  | 1.013761  | 1.881331  |
| C  | 4.770903  | 0.909729  | 4.174722  |
| C  | 4.460340  | 1.539477  | 1.868523  |
| C  | 2.679422  | 0.436420  | 3.060919  |
| C  | 3.482973  | 0.386860  | 4.199806  |
| C  | 5.259129  | 1.488750  | 3.004317  |
| H  | 4.846795  | 2.004388  | 0.961100  |
| H  | 1.657934  | 0.063606  | 3.097504  |
| H  | 3.090579  | -0.055963 | 5.113666  |
| H  | 6.265637  | 1.902770  | 2.975714  |
| H  | 5.394584  | 0.872615  | 5.066159  |
| H  | 3.912232  | -1.396847 | 0.846132  |
| O  | 4.497672  | -2.083831 | -1.021681 |
| O  | 2.939696  | -3.606597 | -0.353023 |
| C  | 4.076706  | -3.446942 | -1.194650 |
| C  | 3.705082  | -3.658969 | -2.652492 |
| H  | 4.559056  | -3.431850 | -3.299188 |
| H  | 3.400896  | -4.697844 | -2.825434 |
| H  | 2.877027  | -3.001716 | -2.942916 |
| C  | 5.158002  | -4.382479 | -0.707023 |
| H  | 4.831653  | -5.424830 | -0.788878 |
| H  | 6.065797  | -4.254228 | -1.304988 |
| H  | 5.391859  | -4.167219 | 0.339736  |
| Rh | -0.211634 | 0.543876  | 0.025361  |
| Cl | -0.577841 | 0.938168  | 2.395568  |
| Br | 0.300532  | 0.082186  | -2.420641 |
| C  | -2.265657 | 0.947654  | -0.435054 |
| H  | -2.596647 | 0.379151  | -1.309759 |
| C  | -1.782245 | 2.277265  | -0.838756 |
| C  | -1.733695 | 2.634310  | -2.207855 |
| C  | -1.256263 | 3.195030  | 0.099217  |
| C  | -1.192571 | 3.836705  | -2.613049 |
| H  | -2.136712 | 1.937443  | -2.940566 |
| C  | -0.700676 | 4.406376  | -0.322173 |
| H  | -1.315531 | 2.973327  | 1.162564  |
| C  | -0.660048 | 4.726301  | -1.669796 |
| H  | -1.177662 | 4.093310  | -3.670966 |
| H  | -0.302687 | 5.097152  | 0.418370  |
| H  | -0.218921 | 5.666784  | -1.996154 |
| C  | -3.223436 | 0.820235  | 0.725639  |

|    |           |           |           |
|----|-----------|-----------|-----------|
| H  | -3.046034 | -0.093353 | 1.307662  |
| H  | -3.103797 | 1.648049  | 1.434051  |
| C  | -4.691792 | 0.790656  | 0.326695  |
| Cl | -5.041820 | -0.641374 | -0.726217 |
| Cl | -5.162010 | 2.271241  | -0.557321 |
| Cl | -5.701574 | 0.639104  | 1.804813  |

## 15

|                              |                     |
|------------------------------|---------------------|
| M06L SCF energy:             | -2604.39901051 a.u. |
| M06L enthalpy:               | -2603.805788 a.u.   |
| M06L free energy:            | -2603.911955 a.u.   |
| M06 SCF energy in solution:  | -2603.92864742 a.u. |
| M06 enthalpy in solution:    | -2603.335425 a.u.   |
| M06 free energy in solution: | -2603.441592 a.u.   |

## Cartesian coordinates

| ATOM | X         | Y         | Z         |
|------|-----------|-----------|-----------|
| Rh   | -0.248905 | -1.049159 | -1.218345 |
| Cl   | 0.790507  | -2.524029 | -2.726901 |
| P    | 1.375560  | -0.463227 | 0.091677  |
| P    | -1.768570 | 0.164306  | -0.193829 |
| O    | -0.639982 | 4.059843  | 0.248661  |
| O    | 1.449712  | 3.385789  | 0.890573  |
| C    | -1.729286 | 2.014149  | -0.306494 |
| C    | -0.686521 | 2.679145  | 0.566618  |
| C    | 0.766439  | 2.248009  | 0.385443  |
| C    | 1.202703  | 1.021039  | 1.173905  |
| C    | 0.696581  | 4.528946  | 0.494254  |
| C    | 0.702731  | 5.511156  | 1.644438  |
| C    | 1.233940  | 5.110260  | -0.799461 |
| C    | 2.923546  | -0.054652 | -0.800409 |
| C    | 4.135728  | 0.034270  | -0.104601 |
| C    | 5.300343  | 0.398294  | -0.771312 |
| C    | 5.263338  | 0.678232  | -2.136482 |
| C    | 4.062092  | 0.589457  | -2.833241 |
| C    | 2.894162  | 0.222261  | -2.169662 |
| C    | 1.861609  | -1.794364 | 1.243481  |
| C    | 1.949517  | -1.626564 | 2.630337  |
| C    | 2.281461  | -2.705424 | 3.448192  |
| C    | 2.534967  | -3.954666 | 2.890168  |
| C    | 2.454480  | -4.126994 | 1.508398  |
| C    | 2.111818  | -3.059006 | 0.689044  |
| C    | -2.147223 | -0.135778 | 1.572183  |
| C    | -1.636681 | -1.299821 | 2.159268  |

|   |           |           |           |
|---|-----------|-----------|-----------|
| C | -1.865147 | -1.572082 | 3.505511  |
| C | -2.609086 | -0.684628 | 4.278678  |
| C | -3.126029 | 0.475662  | 3.704323  |
| C | -2.895167 | 0.750107  | 2.359619  |
| C | -3.306262 | -0.230016 | -1.102296 |
| C | -4.537007 | -0.483259 | -0.487578 |
| C | -5.647008 | -0.818187 | -1.257932 |
| C | -5.539323 | -0.911384 | -2.643913 |
| C | -4.316268 | -0.668638 | -3.264543 |
| C | -3.205022 | -0.331077 | -2.498794 |
| H | -1.522021 | 2.249659  | -1.358641 |
| H | -2.720832 | 2.430478  | -0.080077 |
| H | -0.949648 | 2.544708  | 1.635194  |
| H | 0.978774  | 2.118656  | -0.695819 |
| H | 0.492150  | 0.812834  | 1.987048  |
| H | 2.176310  | 1.229254  | 1.637059  |
| H | 1.727128  | 5.817401  | 1.881856  |
| H | 0.262663  | 5.048027  | 2.533120  |
| H | 0.122733  | 6.403286  | 1.387071  |
| H | 2.242282  | 5.511399  | -0.651324 |
| H | 0.584189  | 5.916936  | -1.155361 |
| H | 1.276141  | 4.338360  | -1.575228 |
| H | 4.170558  | -0.195165 | 0.961840  |
| H | 6.240397  | 0.458583  | -0.225363 |
| H | 6.176874  | 0.959294  | -2.658128 |
| H | 4.032355  | 0.795654  | -3.901526 |
| H | 1.952926  | 0.119074  | -2.710300 |
| H | 1.758880  | -0.655602 | 3.085128  |
| H | 2.343835  | -2.564245 | 4.526199  |
| H | 2.793031  | -4.795888 | 3.531274  |
| H | 2.647160  | -5.102740 | 1.066362  |
| H | 2.014353  | -3.199284 | -0.389446 |
| H | -1.044784 | -1.980688 | 1.543268  |
| H | -1.455112 | -2.477826 | 3.949452  |
| H | -2.786149 | -0.893861 | 5.332343  |
| H | -3.707868 | 1.171112  | 4.306826  |
| H | -3.300815 | 1.662830  | 1.921143  |
| H | -4.626113 | -0.424546 | 0.596668  |
| H | -6.601745 | -1.011572 | -0.771542 |
| H | -6.409231 | -1.179409 | -3.240487 |
| H | -4.223141 | -0.748635 | -4.345701 |
| H | -2.242392 | -0.145364 | -2.984485 |

M06L SCF energy: -5175.66846063 a.u.  
M06L enthalpy: -5175.071689 a.u.  
M06L free energy: -5175.184475 a.u.  
M06 SCF energy in solution: -5177.98007521 a.u.  
M06 enthalpy in solution: -5177.383304 a.u.  
M06 free energy in solution: -5177.496090 a.u.

Cartesian coordinates

| ATOM | X         | Y         | Z         |
|------|-----------|-----------|-----------|
| H    | 0.973157  | 1.069138  | 1.869300  |
| C    | 1.679894  | 1.078388  | 1.027610  |
| H    | 2.692424  | 1.136279  | 1.448571  |
| C    | 1.454871  | 2.303818  | 0.158821  |
| H    | 1.705590  | 2.096288  | -0.902188 |
| C    | 0.071396  | 2.935758  | 0.231255  |
| C    | -1.020242 | 2.368277  | -0.646366 |
| H    | -0.684624 | 2.367018  | -1.692229 |
| H    | -1.891766 | 3.034864  | -0.598365 |
| P    | 1.563543  | -0.503157 | 0.089589  |
| P    | -1.576962 | 0.646334  | -0.233931 |
| C    | 1.858793  | -1.776615 | 1.357484  |
| C    | 2.232655  | -3.799829 | 3.251549  |
| C    | 2.085812  | -1.455198 | 2.702545  |
| C    | 1.814854  | -3.124383 | 0.970712  |
| C    | 2.009090  | -4.125475 | 1.915230  |
| C    | 2.269505  | -2.464890 | 3.643544  |
| H    | 2.116947  | -0.417970 | 3.030758  |
| H    | 1.608587  | -3.380584 | -0.069409 |
| H    | 1.970871  | -5.167398 | 1.604554  |
| H    | 2.444297  | -2.203613 | 4.685945  |
| H    | 2.372569  | -4.587551 | 3.989713  |
| C    | 3.094333  | -0.408316 | -0.902748 |
| C    | 5.430272  | -0.085809 | -2.394792 |
| C    | 4.344830  | -0.574110 | -0.296944 |
| C    | 3.022898  | -0.085944 | -2.261192 |
| C    | 4.188553  | 0.079419  | -3.002382 |
| C    | 5.508150  | -0.414763 | -1.043125 |
| H    | 4.407172  | -0.839512 | 0.759446  |
| H    | 2.047775  | 0.002554  | -2.740644 |
| H    | 4.124875  | 0.322289  | -4.061209 |
| H    | 6.477919  | -0.552848 | -0.568494 |
| H    | 6.342001  | 0.033912  | -2.977570 |
| C    | -3.214084 | 0.629159  | -1.033905 |
| C    | -5.677059 | 0.504061  | -2.345489 |

|    |           |           |           |
|----|-----------|-----------|-----------|
| C  | -3.316305 | 0.989012  | -2.383625 |
| C  | -4.352705 | 0.188465  | -0.352163 |
| C  | -5.578469 | 0.133276  | -1.006488 |
| C  | -4.543890 | 0.929161  | -3.034324 |
| H  | -2.430679 | 1.305049  | -2.935816 |
| H  | -4.272740 | -0.124306 | 0.687643  |
| H  | -6.459984 | -0.210119 | -0.468396 |
| H  | -4.612585 | 1.209762  | -4.083594 |
| H  | -6.637122 | 0.453026  | -2.855858 |
| C  | -1.913677 | 0.733851  | 1.557310  |
| C  | -2.328695 | 0.896138  | 4.317373  |
| C  | -2.657242 | 1.790452  | 2.101352  |
| C  | -1.391358 | -0.244820 | 2.409137  |
| C  | -1.594085 | -0.159157 | 3.784465  |
| C  | -2.864605 | 1.868975  | 3.474063  |
| H  | -3.083754 | 2.551900  | 1.446621  |
| H  | -0.843178 | -1.086600 | 1.984669  |
| H  | -1.182932 | -0.927777 | 4.436854  |
| H  | -3.444967 | 2.691859  | 3.887536  |
| H  | -2.490686 | 0.960807  | 5.391950  |
| Cl | 0.808200  | -2.614945 | -2.421260 |
| H  | -0.256056 | 2.933277  | 1.289955  |
| O  | 0.339843  | 4.261286  | -0.195818 |
| O  | 2.264798  | 3.358393  | 0.652797  |
| C  | 1.659398  | 4.593341  | 0.253139  |
| C  | 2.406534  | 5.203709  | -0.913531 |
| H  | 1.885889  | 6.096692  | -1.275586 |
| H  | 3.420324  | 5.487588  | -0.612628 |
| H  | 2.473466  | 4.484759  | -1.736358 |
| C  | 1.599961  | 5.492748  | 1.470119  |
| H  | 2.605937  | 5.665902  | 1.867202  |
| H  | 1.155007  | 6.459262  | 1.211383  |
| H  | 0.995774  | 5.025861  | 2.254711  |
| Rh | -0.301966 | -1.030155 | -1.040185 |
| Br | -2.056930 | -2.633602 | -0.166893 |

### 17-TS-R

|                              |                           |
|------------------------------|---------------------------|
| M06L SCF energy:             | -6903.89205186 a.u.       |
| M06L enthalpy:               | -6903.136637 a.u.         |
| M06L free energy:            | -6903.275961 a.u.         |
| M06 SCF energy in solution:  | -6906.12420453 a.u.       |
| M06 enthalpy in solution:    | -6905.368790 a.u.         |
| M06 free energy in solution: | -6905.508114 a.u.         |
| Imaginary frequency:         | -37.5957 cm <sup>-1</sup> |

Cartesian coordinates

| ATOM | X         | Y         | Z         |
|------|-----------|-----------|-----------|
| H    | 1.236602  | 0.933735  | -2.493871 |
| C    | 1.460419  | 1.788416  | -1.839058 |
| H    | 1.138743  | 2.690281  | -2.376785 |
| C    | 2.954064  | 1.877145  | -1.621227 |
| H    | 3.184949  | 2.655881  | -0.868377 |
| C    | 3.693312  | 0.604659  | -1.240763 |
| C    | 3.698554  | 0.237720  | 0.229344  |
| H    | 3.609504  | 1.142054  | 0.847364  |
| H    | 4.661554  | -0.229274 | 0.475419  |
| P    | 0.409521  | 1.630612  | -0.315768 |
| P    | 2.375412  | -0.970719 | 0.672136  |
| C    | -1.166808 | 2.297010  | -0.957281 |
| C    | -3.644994 | 3.178666  | -1.913131 |
| C    | -1.601109 | 1.942261  | -2.240390 |
| C    | -1.991933 | 3.094763  | -0.154394 |
| C    | -3.219990 | 3.536484  | -0.634766 |
| C    | -2.835833 | 2.377157  | -2.714755 |
| H    | -0.983845 | 1.309371  | -2.875095 |
| H    | -1.673376 | 3.358436  | 0.852335  |
| H    | -3.855422 | 4.151534  | -0.000125 |
| H    | -3.164435 | 2.080083  | -3.709304 |
| H    | -4.611951 | 3.518267  | -2.282047 |
| C    | 1.048635  | 2.945687  | 0.779831  |
| C    | 2.119611  | 4.893950  | 2.474174  |
| C    | 1.227768  | 4.258487  | 0.323891  |
| C    | 1.398428  | 2.623852  | 2.095482  |
| C    | 1.934861  | 3.594968  | 2.937869  |
| C    | 1.761977  | 5.226489  | 1.167427  |
| H    | 0.943257  | 4.524363  | -0.695230 |
| H    | 1.226495  | 1.608620  | 2.458065  |
| H    | 2.199091  | 3.334445  | 3.961544  |
| H    | 1.899320  | 6.243763  | 0.805116  |
| H    | 2.537841  | 5.653582  | 3.132254  |
| C    | 2.802781  | -1.395004 | 2.390499  |
| C    | 3.344039  | -2.051893 | 5.055097  |
| C    | 3.319043  | -0.432122 | 3.267972  |
| C    | 2.550542  | -2.688753 | 2.865604  |
| C    | 2.826210  | -3.012466 | 4.189010  |
| C    | 3.588950  | -0.761943 | 4.593084  |
| H    | 3.513652  | 0.583352  | 2.923048  |
| H    | 2.120686  | -3.432553 | 2.197330  |

|    |           |           |           |
|----|-----------|-----------|-----------|
| H  | 2.626586  | -4.020582 | 4.546947  |
| H  | 3.993734  | -0.006900 | 5.264787  |
| H  | 3.554448  | -2.307646 | 6.091994  |
| C  | 2.877022  | -2.412270 | -0.328419 |
| C  | 3.682408  | -4.526422 | -1.963713 |
| C  | 4.089607  | -3.068286 | -0.086358 |
| C  | 2.071823  | -2.824177 | -1.395181 |
| C  | 2.476867  | -3.875187 | -2.212262 |
| C  | 4.487129  | -4.124813 | -0.899296 |
| H  | 4.716149  | -2.762943 | 0.752724  |
| H  | 1.109964  | -2.336702 | -1.560974 |
| H  | 1.838815  | -4.194875 | -3.033964 |
| H  | 5.426427  | -4.637538 | -0.699336 |
| H  | 3.993152  | -5.356358 | -2.596042 |
| H  | 3.313384  | -0.235739 | -1.855853 |
| O  | 5.016004  | 0.931390  | -1.639444 |
| O  | 3.559925  | 2.206139  | -2.861950 |
| C  | 4.900659  | 1.687350  | -2.845475 |
| C  | 5.901775  | 2.819221  | -2.783092 |
| H  | 6.919435  | 2.425541  | -2.688765 |
| H  | 5.846042  | 3.428152  | -3.691227 |
| H  | 5.692790  | 3.455521  | -1.917722 |
| C  | 5.070075  | 0.795417  | -4.059689 |
| H  | 4.869802  | 1.357698  | -4.977933 |
| H  | 6.090129  | 0.399389  | -4.106611 |
| H  | 4.370465  | -0.046079 | -4.015139 |
| Rh | 0.191529  | -0.424439 | 0.575944  |
| C  | -4.033961 | -1.238568 | 0.468826  |
| Cl | -0.331218 | -2.743212 | 1.013760  |
| Br | -1.639702 | 0.437822  | 2.084838  |
| H  | -3.848260 | -2.112026 | 1.095066  |
| C  | -5.146981 | -0.427491 | 0.780717  |
| C  | -5.508281 | 0.717454  | 0.024742  |
| C  | -5.944876 | -0.749578 | 1.910027  |
| C  | -6.597178 | 1.490197  | 0.386683  |
| H  | -4.923419 | 0.986824  | -0.852690 |
| C  | -7.032054 | 0.028087  | 2.262899  |
| H  | -5.674870 | -1.621473 | 2.504831  |
| C  | -7.366852 | 1.154774  | 1.504983  |
| H  | -6.856542 | 2.366020  | -0.207440 |
| H  | -7.626554 | -0.236504 | 3.135491  |
| H  | -8.222407 | 1.767113  | 1.783976  |
| C  | -3.061163 | -1.012144 | -0.625214 |
| H  | -3.008177 | 0.039665  | -0.934401 |



|    |           |           |           |
|----|-----------|-----------|-----------|
| H  | -2.065360 | -1.296725 | -0.256016 |
| C  | -3.265745 | -1.841043 | -1.886910 |
| Cl | -4.734540 | -1.313381 | -2.781112 |
| Cl | -3.399719 | -3.576213 | -1.515265 |
| Cl | -1.825223 | -1.589002 | -2.964162 |

### 17-TS-R2

|                              |                           |
|------------------------------|---------------------------|
| M06L SCF energy:             | -6903.88929934 a.u.       |
| M06L enthalpy:               | -6903.134401 a.u.         |
| M06L free energy:            | -6903.275577 a.u.         |
| M06 SCF energy in solution:  | -6906.11748060 a.u.       |
| M06 enthalpy in solution:    | -6905.362582 a.u.         |
| M06 free energy in solution: | -6905.503758 a.u.         |
| Imaginary frequency:         | -37.2961 cm <sup>-1</sup> |

### Cartesian coordinates

| ATOM | X         | Y         | Z         |
|------|-----------|-----------|-----------|
| H    | -2.412105 | -1.262530 | -2.060041 |
| C    | -2.710254 | -1.738426 | -1.115493 |
| H    | -2.930023 | -2.788764 | -1.348067 |
| C    | -3.983406 | -1.100382 | -0.613164 |
| H    | -4.205395 | -1.440356 | 0.417667  |
| C    | -4.089393 | 0.415046  | -0.658039 |
| C    | -3.512994 | 1.168092  | 0.520190  |
| H    | -3.630356 | 0.575845  | 1.438376  |
| H    | -4.095090 | 2.087092  | 0.666534  |
| P    | -1.246075 | -1.706540 | 0.031609  |
| P    | -1.739875 | 1.669842  | 0.345740  |
| C    | -0.334405 | -3.143074 | -0.651869 |
| C    | 1.125381  | -5.285810 | -1.717108 |
| C    | -0.246661 | -3.328211 | -2.036087 |
| C    | 0.324038  | -4.044395 | 0.193306  |
| C    | 1.047581  | -5.107232 | -0.337599 |
| C    | 0.474795  | -4.394525 | -2.566135 |
| H    | -0.734303 | -2.627581 | -2.713168 |
| H    | 0.272736  | -3.906874 | 1.271562  |
| H    | 1.554488  | -5.799339 | 0.332391  |
| H    | 0.527852  | -4.527520 | -3.646039 |
| H    | 1.690998  | -6.119429 | -2.129718 |
| C    | -1.945643 | -2.365293 | 1.589075  |
| C    | -3.039665 | -3.313748 | 3.981706  |
| C    | -2.733677 | -3.524217 | 1.598541  |
| C    | -1.702051 | -1.695800 | 2.792096  |
| C    | -2.249668 | -2.167843 | 3.983526  |

|    |           |           |           |
|----|-----------|-----------|-----------|
| C  | -3.278247 | -3.994523 | 2.788091  |
| H  | -2.915321 | -4.066221 | 0.669316  |
| H  | -1.059418 | -0.813381 | 2.784537  |
| H  | -2.048360 | -1.642037 | 4.915438  |
| H  | -3.889135 | -4.895426 | 2.785605  |
| H  | -3.465053 | -3.684174 | 4.912775  |
| C  | -1.606101 | 2.755464  | 1.807936  |
| C  | -1.365389 | 4.357332  | 4.089637  |
| C  | -2.038999 | 2.287414  | 3.054458  |
| C  | -1.034876 | 4.029400  | 1.720121  |
| C  | -0.921747 | 4.825003  | 2.855301  |
| C  | -1.922105 | 3.084904  | 4.187997  |
| H  | -2.463913 | 1.287508  | 3.149012  |
| H  | -0.665637 | 4.389087  | 0.762165  |
| H  | -0.474710 | 5.814095  | 2.774194  |
| H  | -2.265809 | 2.709194  | 5.150136  |
| H  | -1.272769 | 4.982192  | 4.976203  |
| C  | -1.824846 | 2.791460  | -1.094224 |
| C  | -1.980340 | 4.378956  | -3.390168 |
| C  | -2.741675 | 3.848014  | -1.162873 |
| C  | -0.982755 | 2.544855  | -2.183228 |
| C  | -1.064318 | 3.332624  | -3.327677 |
| C  | -2.815289 | 4.639536  | -2.304400 |
| H  | -3.391458 | 4.062968  | -0.313565 |
| H  | -0.250162 | 1.737567  | -2.117505 |
| H  | -0.406477 | 3.129533  | -4.171729 |
| H  | -3.527289 | 5.461954  | -2.347921 |
| H  | -2.042256 | 4.997866  | -4.283676 |
| H  | -3.663611 | 0.786074  | -1.612341 |
| O  | -5.499311 | 0.594667  | -0.654538 |
| O  | -5.034412 | -1.485443 | -1.487918 |
| C  | -6.077262 | -0.514965 | -1.350745 |
| C  | -7.205083 | -1.060245 | -0.498715 |
| H  | -7.958136 | -0.285802 | -0.317606 |
| H  | -7.687991 | -1.906962 | -0.997946 |
| H  | -6.817543 | -1.396329 | 0.468488  |
| C  | -6.516638 | -0.103811 | -2.740451 |
| H  | -6.872188 | -0.973684 | -3.303135 |
| H  | -7.326785 | 0.630780  | -2.683646 |
| H  | -5.677409 | 0.340925  | -3.284850 |
| Rh | -0.044210 | 0.180820  | 0.259569  |
| C  | 3.899533  | -0.446985 | -0.556630 |
| Cl | 1.406720  | 2.123014  | 0.476175  |
| Br | 1.795499  | -1.185105 | 1.332667  |

|    |          |           |           |
|----|----------|-----------|-----------|
| H  | 4.121516 | -1.487919 | -0.327124 |
| C  | 3.139394 | -0.180820 | -1.719016 |
| C  | 2.976576 | 1.120744  | -2.257382 |
| C  | 2.498834 | -1.259587 | -2.382195 |
| C  | 2.212924 | 1.324764  | -3.392835 |
| H  | 3.457263 | 1.969584  | -1.780211 |
| C  | 1.732274 | -1.043621 | -3.511699 |
| H  | 2.592262 | -2.262489 | -1.963299 |
| C  | 1.579835 | 0.250353  | -4.022000 |
| H  | 2.103621 | 2.332604  | -3.790033 |
| H  | 1.250213 | -1.885077 | -4.006138 |
| H  | 0.976680 | 0.418167  | -4.913619 |
| C  | 4.559595 | 0.577080  | 0.292933  |
| H  | 4.333779 | 1.596350  | -0.034369 |
| H  | 4.186184 | 0.500698  | 1.322943  |
| C  | 6.076534 | 0.427318  | 0.349045  |
| Cl | 6.773963 | 0.543330  | -1.302691 |
| Cl | 6.524347 | -1.161654 | 1.058748  |
| Cl | 6.762280 | 1.725379  | 1.368856  |

### 17-TS-R3

|                              |                           |
|------------------------------|---------------------------|
| M06L SCF energy:             | -6903.88979598 a.u.       |
| M06L enthalpy:               | -6903.134676 a.u.         |
| M06L free energy:            | -6903.274192 a.u.         |
| M06 SCF energy in solution:  | -6906.11671108 a.u.       |
| M06 enthalpy in solution:    | -6905.361591 a.u.         |
| M06 free energy in solution: | -6905.501107 a.u.         |
| Imaginary frequency:         | -60.0515 cm <sup>-1</sup> |

### Cartesian coordinates

| ATOM | X         | Y         | Z         |
|------|-----------|-----------|-----------|
| H    | -3.775667 | 0.290418  | 0.937960  |
| C    | -3.586491 | 0.868587  | 0.022213  |
| H    | -4.302047 | 1.700573  | 0.004130  |
| C    | -3.817240 | 0.016273  | -1.210567 |
| H    | -3.129541 | 0.305071  | -2.032941 |
| C    | -3.738881 | -1.485957 | -0.995084 |
| C    | -2.379607 | -2.143657 | -1.056869 |
| H    | -1.920222 | -1.911240 | -2.027510 |
| H    | -2.522975 | -3.232083 | -1.030669 |
| P    | -1.886752 | 1.585291  | 0.066113  |
| P    | -1.146888 | -1.681132 | 0.251889  |
| C    | -1.854877 | 2.437428  | 1.684654  |
| C    | -1.715855 | 3.636521  | 4.212316  |

|   |           |           |           |
|---|-----------|-----------|-----------|
| C | -3.012841 | 2.610787  | 2.455183  |
| C | -0.624505 | 2.876636  | 2.195387  |
| C | -0.561380 | 3.474617  | 3.449413  |
| C | -2.941414 | 3.206936  | 3.711679  |
| H | -3.980406 | 2.274848  | 2.087062  |
| H | 0.283821  | 2.735116  | 1.609717  |
| H | 0.400517  | 3.807443  | 3.834199  |
| H | -3.848971 | 3.331113  | 4.300413  |
| H | -1.659832 | 4.096021  | 5.197782  |
| C | -2.085591 | 2.898437  | -1.192181 |
| C | -2.534240 | 4.816514  | -3.169948 |
| C | -2.840157 | 4.040917  | -0.907265 |
| C | -1.554025 | 2.725637  | -2.473221 |
| C | -1.783012 | 3.680238  | -3.459404 |
| C | -3.061429 | 4.997085  | -1.893296 |
| H | -3.246979 | 4.188503  | 0.094136  |
| H | -0.930733 | 1.855041  | -2.678933 |
| H | -1.357509 | 3.543858  | -4.451722 |
| H | -3.642228 | 5.888018  | -1.661285 |
| H | -2.702567 | 5.568337  | -3.938999 |
| C | -0.117424 | -3.195846 | 0.244803  |
| C | 1.393808  | -5.553091 | 0.251486  |
| C | 0.112591  | -3.896216 | -0.944176 |
| C | 0.440375  | -3.678004 | 1.436012  |
| C | 1.191325  | -4.848101 | 1.435894  |
| C | 0.854796  | -5.073280 | -0.937689 |
| H | -0.289911 | -3.528844 | -1.887365 |
| H | 0.279066  | -3.135791 | 2.365980  |
| H | 1.613482  | -5.214601 | 2.369805  |
| H | 1.018032  | -5.610283 | -1.871182 |
| H | 1.975716  | -6.473415 | 0.255640  |
| C | -2.084764 | -1.826135 | 1.817713  |
| C | -3.575788 | -1.936189 | 4.183007  |
| C | -3.001869 | -2.864835 | 2.030741  |
| C | -1.905262 | -0.861015 | 2.814528  |
| C | -2.650627 | -0.914938 | 3.990495  |
| C | -3.745003 | -2.916516 | 3.204936  |
| H | -3.137427 | -3.636905 | 1.271978  |
| H | -1.175963 | -0.064674 | 2.663870  |
| H | -2.504939 | -0.149618 | 4.750993  |
| H | -4.461487 | -3.721915 | 3.356674  |
| H | -4.164854 | -1.974784 | 5.097712  |
| H | -4.234485 | -1.721732 | -0.033278 |
| O | -4.510740 | -1.984706 | -2.076066 |

|    |           |           |           |
|----|-----------|-----------|-----------|
| O  | -5.165931 | 0.162104  | -1.627470 |
| C  | -5.487322 | -0.985973 | -2.413086 |
| C  | -5.352319 | -0.682939 | -3.892100 |
| H  | -5.496351 | -1.593230 | -4.483928 |
| H  | -6.097053 | 0.057825  | -4.201793 |
| H  | -4.354613 | -0.286696 | -4.108731 |
| C  | -6.872794 | -1.446840 | -2.016306 |
| H  | -7.606556 | -0.654408 | -2.198427 |
| H  | -7.161891 | -2.329928 | -2.595281 |
| H  | -6.893422 | -1.701067 | -0.952001 |
| Rh | -0.058603 | 0.266471  | -0.068700 |
| C  | 4.275328  | -0.694500 | 0.278684  |
| Br | 1.669585  | -0.426109 | 1.657438  |
| Cl | 1.223515  | 2.207844  | -0.761071 |
| H  | 4.834772  | -1.263725 | 1.022949  |
| C  | 3.759599  | -1.418046 | -0.824236 |
| C  | 4.054540  | -2.798300 | -0.943736 |
| C  | 2.942060  | -0.821675 | -1.818746 |
| C  | 3.598473  | -3.533314 | -2.022493 |
| H  | 4.665687  | -3.271274 | -0.174988 |
| C  | 2.467907  | -1.574845 | -2.879955 |
| H  | 2.677077  | 0.232111  | -1.741888 |
| C  | 2.800732  | -2.927174 | -2.997080 |
| H  | 3.850625  | -4.589680 | -2.103679 |
| H  | 1.837523  | -1.100265 | -3.631504 |
| H  | 2.434550  | -3.509952 | -3.841725 |
| C  | 4.362066  | 0.788247  | 0.383006  |
| H  | 3.541827  | 1.293387  | -0.144014 |
| H  | 4.292219  | 1.097353  | 1.432302  |
| C  | 5.678105  | 1.363020  | -0.145065 |
| Cl | 7.077350  | 0.608254  | 0.710686  |
| Cl | 5.707676  | 3.127306  | 0.152329  |
| Cl | 5.858013  | 1.067725  | -1.900762 |

#### 17-TS-R4

|                              |                     |
|------------------------------|---------------------|
| M06L SCF energy:             | -6903.89696046 a.u. |
| M06L enthalpy:               | -6903.140690 a.u.   |
| M06L free energy:            | -6903.278800 a.u.   |
| M06 SCF energy in solution:  | -6906.12071706 a.u. |
| M06 enthalpy in solution:    | -6905.364447 a.u.   |
| M06 free energy in solution: | -6905.502557 a.u.   |
| Imaginary frequency:         | -60.3774 cm-1       |

Cartesian coordinates

| ATOM | X         | Y         | Z         |
|------|-----------|-----------|-----------|
| H    | -3.824134 | -0.893875 | -0.068284 |
| C    | -3.621182 | 0.186685  | -0.063577 |
| H    | -4.527137 | 0.687407  | 0.300661  |
| C    | -3.326852 | 0.696622  | -1.470137 |
| H    | -2.457776 | 1.384599  | -1.465233 |
| C    | -3.107656 | -0.382529 | -2.535454 |
| C    | -1.680819 | -0.862414 | -2.745551 |
| H    | -1.094830 | -0.034164 | -3.167368 |
| H    | -1.664837 | -1.676291 | -3.483806 |
| P    | -2.229071 | 0.550745  | 1.095037  |
| P    | -0.790874 | -1.351275 | -1.207930 |
| C    | -2.705581 | -0.315395 | 2.629548  |
| C    | -3.302540 | -1.712157 | 4.979938  |
| C    | -3.976167 | -0.872127 | 2.820657  |
| C    | -1.734516 | -0.465206 | 3.630346  |
| C    | -2.035991 | -1.157682 | 4.798202  |
| C    | -4.271561 | -1.566445 | 3.990948  |
| H    | -4.744111 | -0.772423 | 2.055170  |
| H    | -0.741789 | -0.037671 | 3.476557  |
| H    | -1.274987 | -1.268725 | 5.568457  |
| H    | -5.262132 | -1.997340 | 4.126814  |
| H    | -3.533790 | -2.259183 | 5.892544  |
| C    | -2.539086 | 2.323045  | 1.431814  |
| C    | -3.114774 | 5.030749  | 1.808286  |
| C    | -3.514431 | 2.715799  | 2.354641  |
| C    | -1.850932 | 3.298459  | 0.701286  |
| C    | -2.144158 | 4.645661  | 0.887244  |
| C    | -3.797592 | 4.064805  | 2.543315  |
| H    | -4.047866 | 1.963825  | 2.937007  |
| H    | -1.062204 | 2.998912  | 0.009201  |
| H    | -1.597405 | 5.397299  | 0.321075  |
| H    | -4.550779 | 4.361616  | 3.271391  |
| H    | -3.334531 | 6.086246  | 1.960544  |
| C    | 0.661489  | -2.268633 | -1.835746 |
| C    | 3.003483  | -3.574657 | -2.641673 |
| C    | 1.269487  | -1.944742 | -3.054750 |
| C    | 1.244735  | -3.251938 | -1.024977 |
| C    | 2.408337  | -3.899464 | -1.425114 |
| C    | 2.431108  | -2.599544 | -3.454477 |
| H    | 0.848290  | -1.165871 | -3.687300 |
| H    | 0.787458  | -3.509891 | -0.069773 |
| H    | 2.856145  | -4.652931 | -0.779556 |
| H    | 2.892726  | -2.340167 | -4.405821 |

|    |           |           |           |
|----|-----------|-----------|-----------|
| H  | 3.918914  | -4.075945 | -2.951330 |
| C  | -1.794782 | -2.688255 | -0.465271 |
| C  | -3.271425 | -4.714056 | 0.781179  |
| C  | -2.659213 | -3.497810 | -1.213397 |
| C  | -1.662412 | -2.925399 | 0.908106  |
| C  | -2.394368 | -3.933165 | 1.529041  |
| C  | -3.397939 | -4.499348 | -0.590569 |
| H  | -2.755543 | -3.349273 | -2.288837 |
| H  | -0.983420 | -2.300671 | 1.492715  |
| H  | -2.286908 | -4.093516 | 2.600542  |
| H  | -4.074118 | -5.116213 | -1.179868 |
| H  | -3.854409 | -5.495764 | 1.264933  |
| H  | -3.761855 | -1.241326 | -2.292620 |
| O  | -3.564553 | 0.229862  | -3.730530 |
| O  | -4.474021 | 1.360607  | -1.974324 |
| C  | -4.304652 | 1.415161  | -3.382646 |
| C  | -3.492015 | 2.632332  | -3.792467 |
| H  | -3.300673 | 2.616208  | -4.870574 |
| H  | -4.029141 | 3.554252  | -3.544009 |
| H  | -2.522678 | 2.646267  | -3.280331 |
| C  | -5.670971 | 1.363745  | -4.024048 |
| H  | -6.261695 | 2.240453  | -3.738337 |
| H  | -5.576938 | 1.347354  | -5.114395 |
| H  | -6.199220 | 0.461881  | -3.701082 |
| Rh | -0.185854 | 0.282061  | 0.197276  |
| Br | 1.345575  | 1.238918  | -1.602096 |
| C  | 3.935036  | 0.517830  | -0.769752 |
| Cl | 0.795034  | 1.564076  | 2.021669  |
| H  | 4.215008  | 0.036186  | -1.708453 |
| C  | 4.493214  | 1.798398  | -0.512874 |
| C  | 5.407490  | 2.349442  | -1.441996 |
| C  | 4.160418  | 2.559818  | 0.634760  |
| C  | 5.987307  | 3.586654  | -1.221640 |
| H  | 5.660686  | 1.774033  | -2.332256 |
| C  | 4.738475  | 3.799163  | 0.841167  |
| H  | 3.415587  | 2.182598  | 1.335929  |
| C  | 5.656956  | 4.316637  | -0.077684 |
| H  | 6.697988  | 3.989965  | -1.940425 |
| H  | 4.465387  | 4.377493  | 1.721447  |
| H  | 6.106144  | 5.293533  | 0.092728  |
| C  | 3.283679  | -0.357290 | 0.242509  |
| H  | 2.675410  | 0.222074  | 0.952356  |
| H  | 2.604841  | -1.056588 | -0.262680 |
| C  | 4.230723  | -1.223043 | 1.071506  |

|    |          |           |          |
|----|----------|-----------|----------|
| C1 | 5.279194 | -0.233280 | 2.124303 |
| C1 | 3.229934 | -2.305503 | 2.103982 |
| C1 | 5.273161 | -2.236663 | 0.011004 |

**17-TS-R5**

|                              |                           |
|------------------------------|---------------------------|
| M06L SCF energy:             | -6903.89325927 a.u.       |
| M06L enthalpy:               | -6903.137777 a.u.         |
| M06L free energy:            | -6903.275781 a.u.         |
| M06 SCF energy in solution:  | -6906.11470734 a.u.       |
| M06 enthalpy in solution:    | -6905.359225 a.u.         |
| M06 free energy in solution: | -6905.497229 a.u.         |
| Imaginary frequency:         | -85.1131 cm <sup>-1</sup> |

Cartesian coordinates

| ATOM | X         | Y         | Z         |
|------|-----------|-----------|-----------|
| H    | -4.067868 | 0.101266  | 0.302697  |
| C    | -3.534814 | -0.836487 | 0.514123  |
| H    | -4.271413 | -1.648889 | 0.473807  |
| C    | -2.917633 | -0.817299 | 1.909370  |
| H    | -1.886850 | -1.222618 | 1.888036  |
| C    | -2.907866 | 0.539390  | 2.619399  |
| C    | -1.697350 | 1.431477  | 2.392764  |
| H    | -0.823943 | 0.956884  | 2.861862  |
| H    | -1.842732 | 2.398692  | 2.892826  |
| P    | -2.245126 | -1.138070 | -0.775815 |
| P    | -1.225780 | 1.671991  | 0.621820  |
| C    | -3.140292 | -0.976962 | -2.358040 |
| C    | -4.381981 | -0.677564 | -4.847618 |
| C    | -4.532599 | -0.857560 | -2.444944 |
| C    | -2.374556 | -0.942377 | -3.532372 |
| C    | -2.994997 | -0.796457 | -4.768007 |
| C    | -5.148523 | -0.709830 | -3.685797 |
| H    | -5.146131 | -0.876535 | -1.545213 |
| H    | -1.288433 | -1.029197 | -3.462164 |
| H    | -2.391201 | -0.774528 | -5.673347 |
| H    | -6.231974 | -0.618005 | -3.742337 |
| H    | -4.865409 | -0.559722 | -5.816050 |
| C    | -2.013495 | -2.944008 | -0.563959 |
| C    | -1.768139 | -5.684983 | -0.075854 |
| C    | -2.921985 | -3.846915 | -1.127592 |
| C    | -0.977581 | -3.426495 | 0.243613  |
| C    | -0.862167 | -4.791211 | 0.489365  |
| C    | -2.796143 | -5.211400 | -0.886700 |
| H    | -3.727993 | -3.483501 | -1.765757 |



|    |           |           |           |
|----|-----------|-----------|-----------|
| H  | -0.245556 | -2.730725 | 0.657052  |
| H  | -0.048726 | -5.156324 | 1.113657  |
| H  | -3.502627 | -5.906369 | -1.337441 |
| H  | -1.668957 | -6.753289 | 0.109598  |
| C  | -0.127864 | 3.139508  | 0.703829  |
| C  | 1.534184  | 5.389634  | 0.869000  |
| C  | 0.977844  | 3.146380  | 1.567147  |
| C  | -0.376230 | 4.268759  | -0.087381 |
| C  | 0.449768  | 5.385777  | -0.002582 |
| C  | 1.797252  | 4.265687  | 1.649404  |
| H  | 1.206902  | 2.263808  | 2.161680  |
| H  | -1.228578 | 4.285525  | -0.764334 |
| H  | 0.237491  | 6.258344  | -0.618400 |
| H  | 2.653475  | 4.254292  | 2.321709  |
| H  | 2.180422  | 6.263835  | 0.934729  |
| C  | -2.726596 | 2.367381  | -0.163614 |
| C  | -4.993486 | 3.380956  | -1.457196 |
| C  | -3.695212 | 3.078828  | 0.555867  |
| C  | -2.892297 | 2.203980  | -1.543266 |
| C  | -4.019111 | 2.706774  | -2.188160 |
| C  | -4.825810 | 3.574237  | -0.086678 |
| H  | -3.566785 | 3.250856  | 1.624437  |
| H  | -2.127956 | 1.665738  | -2.106527 |
| H  | -4.137995 | 2.554854  | -3.259785 |
| H  | -5.579220 | 4.113776  | 0.484524  |
| H  | -5.882896 | 3.763650  | -1.954988 |
| H  | -3.831872 | 1.078683  | 2.337600  |
| O  | -2.970713 | 0.193558  | 3.994021  |
| O  | -3.723770 | -1.586698 | 2.787205  |
| C  | -3.352861 | -1.191571 | 4.099223  |
| C  | -2.156777 | -1.986825 | 4.596076  |
| H  | -1.828936 | -1.611279 | 5.571213  |
| H  | -2.414471 | -3.046971 | 4.695624  |
| H  | -1.312748 | -1.897924 | 3.901815  |
| C  | -4.566141 | -1.314658 | 4.989856  |
| H  | -4.895746 | -2.357426 | 5.045993  |
| H  | -4.330747 | -0.968466 | 6.001260  |
| H  | -5.383366 | -0.707520 | 4.589372  |
| Rh | -0.303940 | -0.088205 | -0.401566 |
| Br | 1.560824  | -0.351512 | 1.332291  |
| C  | 3.760541  | -0.197669 | -0.199503 |
| Cl | 0.845102  | -1.529082 | -1.987528 |
| H  | 3.160787  | -0.849461 | -0.837748 |
| C  | 3.764902  | 1.185551  | -0.528175 |

|    |          |           |           |
|----|----------|-----------|-----------|
| C  | 2.804263 | 1.652108  | -1.460575 |
| C  | 4.659790 | 2.123724  | 0.037099  |
| C  | 2.753019 | 2.989299  | -1.813511 |
| H  | 2.109286 | 0.929472  | -1.894033 |
| C  | 4.612248 | 3.455777  | -0.336499 |
| H  | 5.416827 | 1.791140  | 0.745644  |
| C  | 3.659535 | 3.895981  | -1.259064 |
| H  | 2.004253 | 3.332636  | -2.525449 |
| H  | 5.320298 | 4.162959  | 0.092522  |
| H  | 3.620019 | 4.946875  | -1.541032 |
| C  | 4.736826 | -0.877337 | 0.697480  |
| H  | 5.169652 | -0.201122 | 1.443958  |
| H  | 4.232289 | -1.683383 | 1.242904  |
| C  | 5.904541 | -1.539263 | -0.042767 |
| Cl | 6.893963 | -0.314007 | -0.896446 |
| Cl | 6.941845 | -2.378138 | 1.164852  |
| Cl | 5.296390 | -2.732161 | -1.221586 |

### 17-TS-S

|                              |                           |
|------------------------------|---------------------------|
| M06L SCF energy:             | -6903.88756590 a.u.       |
| M06L enthalpy:               | -6903.132920 a.u.         |
| M06L free energy:            | -6903.275700 a.u.         |
| M06 SCF energy in solution:  | -6906.12083400 a.u.       |
| M06 enthalpy in solution:    | -6905.366188 a.u.         |
| M06 free energy in solution: | -6905.508968 a.u.         |
| Imaginary frequency:         | -26.9253 cm <sup>-1</sup> |

### Cartesian coordinates

| ATOM | X         | Y         | Z         |
|------|-----------|-----------|-----------|
| H    | -1.780585 | -2.292815 | -1.666490 |
| C    | -2.257751 | -2.399950 | -0.682480 |
| H    | -2.307868 | -3.478244 | -0.480495 |
| C    | -3.666053 | -1.854268 | -0.744106 |
| H    | -4.163947 | -1.982395 | 0.237277  |
| C    | -3.874258 | -0.414013 | -1.190547 |
| C    | -3.739491 | 0.651631  | -0.116455 |
| H    | -3.912876 | 0.226661  | 0.882805  |
| H    | -4.517349 | 1.406273  | -0.290834 |
| P    | -1.120690 | -1.622787 | 0.560699  |
| P    | -2.110092 | 1.515348  | -0.159263 |
| C    | 0.116211  | -2.946608 | 0.751854  |
| C    | 2.101583  | -4.898746 | 0.962654  |
| C    | 0.384561  | -3.544515 | 1.986276  |
| C    | 0.859298  | -3.323622 | -0.372822 |

|   |           |           |           |
|---|-----------|-----------|-----------|
| C | 1.846325  | -4.297102 | -0.267578 |
| C | 1.370615  | -4.521553 | 2.086112  |
| H | -0.165608 | -3.236835 | 2.873851  |
| H | 0.688393  | -2.839750 | -1.335141 |
| H | 2.424467  | -4.567060 | -1.149093 |
| H | 1.574146  | -4.981964 | 3.051274  |
| H | 2.877736  | -5.657221 | 1.047924  |
| C | -2.084732 | -1.631812 | 2.108927  |
| C | -3.616947 | -1.589027 | 4.447426  |
| C | -2.035939 | -0.526186 | 2.965174  |
| C | -2.895377 | -2.724991 | 2.446840  |
| C | -3.657980 | -2.702717 | 3.609002  |
| C | -2.803947 | -0.505441 | 4.127489  |
| H | -1.386209 | 0.314337  | 2.719089  |
| H | -2.926933 | -3.601649 | 1.798349  |
| H | -4.285724 | -3.555195 | 3.861502  |
| H | -2.759911 | 0.361745  | 4.784007  |
| H | -4.218182 | -1.570888 | 5.354650  |
| C | -2.178038 | 2.611248  | 1.295950  |
| C | -2.198594 | 4.194779  | 3.603232  |
| C | -3.378832 | 2.862969  | 1.973951  |
| C | -0.986071 | 3.166988  | 1.783968  |
| C | -1.002745 | 3.954213  | 2.930670  |
| C | -3.386913 | 3.653318  | 3.119968  |
| H | -4.316659 | 2.440217  | 1.618063  |
| H | -0.045054 | 2.968418  | 1.270996  |
| H | -0.069607 | 4.371111  | 3.303611  |
| H | -4.326119 | 3.839763  | 3.638041  |
| H | -2.204852 | 4.803939  | 4.505360  |
| C | -2.333976 | 2.563257  | -1.636815 |
| C | -2.803571 | 4.049601  | -3.951532 |
| C | -3.072676 | 3.748887  | -1.572906 |
| C | -1.823217 | 2.134078  | -2.866081 |
| C | -2.065766 | 2.870024  | -4.020070 |
| C | -3.301780 | 4.490408  | -2.728161 |
| H | -3.457847 | 4.099764  | -0.614889 |
| H | -1.202252 | 1.237717  | -2.905729 |
| H | -1.659908 | 2.532113  | -4.971437 |
| H | -3.868311 | 5.418087  | -2.670606 |
| H | -2.982507 | 4.632927  | -4.852950 |
| H | -3.213680 | -0.198992 | -2.056001 |
| O | -5.228632 | -0.451671 | -1.612460 |
| O | -4.370478 | -2.569027 | -1.746283 |
| C | -5.482314 | -1.757536 | -2.144540 |

|    |           |           |           |
|----|-----------|-----------|-----------|
| C  | -6.766101 | -2.268640 | -1.525157 |
| H  | -7.598316 | -1.595291 | -1.756357 |
| H  | -7.005634 | -3.265179 | -1.910541 |
| H  | -6.662854 | -2.327317 | -0.436844 |
| C  | -5.513494 | -1.721270 | -3.657496 |
| H  | -5.616486 | -2.733312 | -4.063219 |
| H  | -6.356672 | -1.116779 | -4.007476 |
| H  | -4.585836 | -1.286737 | -4.043390 |
| Rh | -0.189507 | 0.332262  | -0.081581 |
| C  | 3.899196  | 0.017988  | -0.590663 |
| Br | 1.463911  | 0.068201  | 1.804358  |
| Cl | 0.979767  | 2.203261  | -1.037500 |
| H  | 3.201893  | 0.854706  | -0.632709 |
| C  | 3.730072  | -1.018263 | -1.535361 |
| C  | 4.600109  | -2.134865 | -1.649729 |
| C  | 2.632911  | -0.948306 | -2.439084 |
| C  | 4.385265  | -3.110490 | -2.608093 |
| H  | 5.464461  | -2.213902 | -0.991690 |
| C  | 2.423829  | -1.934545 | -3.388147 |
| H  | 1.966692  | -0.085807 | -2.371747 |
| C  | 3.295715  | -3.025335 | -3.481952 |
| H  | 5.075495  | -3.950008 | -2.684093 |
| H  | 1.580192  | -1.853314 | -4.073716 |
| H  | 3.136682  | -3.793540 | -4.236855 |
| C  | 4.938491  | 0.077068  | 0.466569  |
| H  | 4.478372  | 0.381658  | 1.417314  |
| C  | 6.044403  | 1.093082  | 0.182749  |
| H  | 5.432397  | -0.886760 | 0.637965  |
| Cl | 5.353894  | 2.726509  | -0.025397 |
| Cl | 7.194245  | 1.117724  | 1.570235  |
| Cl | 6.944464  | 0.633768  | -1.301864 |

### 17-TS-S2

|                              |                           |
|------------------------------|---------------------------|
| M06L SCF energy:             | -6903.89216602 a.u.       |
| M06L enthalpy:               | -6903.136995 a.u.         |
| M06L free energy:            | -6903.277612 a.u.         |
| M06 SCF energy in solution:  | -6906.12114078 a.u.       |
| M06 enthalpy in solution:    | -6905.365970 a.u.         |
| M06 free energy in solution: | -6905.506587 a.u.         |
| Imaginary frequency:         | -32.6248 cm <sup>-1</sup> |

### Cartesian coordinates

| ATOM | X         | Y         | Z         |
|------|-----------|-----------|-----------|
| H    | -1.627277 | -2.342835 | -1.552089 |

|   |           |           |           |
|---|-----------|-----------|-----------|
| C | -2.029200 | -2.462762 | -0.537120 |
| H | -1.980955 | -3.535373 | -0.305744 |
| C | -3.477217 | -2.033430 | -0.521312 |
| H | -3.885764 | -2.117254 | 0.505777  |
| C | -3.820527 | -0.652047 | -1.057263 |
| C | -3.688466 | 0.487711  | -0.066326 |
| H | -3.777167 | 0.112363  | 0.963459  |
| H | -4.517016 | 1.188284  | -0.233806 |
| P | -0.885851 | -1.570518 | 0.619117  |
| P | -2.111625 | 1.427754  | -0.245600 |
| C | 0.463255  | -2.796669 | 0.717207  |
| C | 2.656534  | -4.530844 | 0.790161  |
| C | 0.946502  | -3.381599 | -0.461110 |
| C | 1.093035  | -3.087436 | 1.932476  |
| C | 2.182314  | -3.952362 | 1.965437  |
| C | 2.034925  | -4.247207 | -0.423295 |
| H | 0.490218  | -3.143875 | -1.422094 |
| H | 0.737064  | -2.623022 | 2.850745  |
| H | 2.667489  | -4.168654 | 2.915654  |
| H | 2.409693  | -4.681700 | -1.348243 |
| H | 3.518135  | -5.195771 | 0.816452  |
| C | -1.731354 | -1.669827 | 2.234933  |
| C | -3.072216 | -1.751450 | 4.686100  |
| C | -2.303754 | -2.865875 | 2.689560  |
| C | -1.826799 | -0.520422 | 3.026748  |
| C | -2.499883 | -0.561654 | 4.245666  |
| C | -2.970368 | -2.905429 | 3.909057  |
| H | -2.222750 | -3.772211 | 2.087809  |
| H | -1.357738 | 0.403622  | 2.684990  |
| H | -2.568404 | 0.340557  | 4.850986  |
| H | -3.411161 | -3.838416 | 4.255641  |
| H | -3.597355 | -1.784203 | 5.639303  |
| C | -2.221402 | 2.633799  | 1.125970  |
| C | -2.255270 | 4.385177  | 3.313033  |
| C | -3.362977 | 2.746494  | 1.931173  |
| C | -1.096086 | 3.416537  | 1.427540  |
| C | -1.120339 | 4.288038  | 2.510754  |
| C | -3.377214 | 3.616204  | 3.018675  |
| H | -4.250820 | 2.152928  | 1.723808  |
| H | -0.195783 | 3.324813  | 0.819436  |
| H | -0.237748 | 4.883110  | 2.736420  |
| H | -4.269990 | 3.687539  | 3.637796  |
| H | -2.264043 | 5.057618  | 4.169237  |
| C | -2.458939 | 2.359218  | -1.779066 |

|    |           |           |           |
|----|-----------|-----------|-----------|
| C  | -3.095622 | 3.666561  | -4.160885 |
| C  | -3.394882 | 3.399429  | -1.783316 |
| C  | -1.839589 | 1.983395  | -2.974575 |
| C  | -2.162629 | 2.633196  | -4.161989 |
| C  | -3.709239 | 4.051849  | -2.970780 |
| H  | -3.871064 | 3.708157  | -0.851212 |
| H  | -1.077812 | 1.203636  | -2.960411 |
| H  | -1.670065 | 2.340956  | -5.087478 |
| H  | -4.431279 | 4.866636  | -2.965764 |
| H  | -3.339607 | 4.181210  | -5.088818 |
| H  | -3.234034 | -0.453989 | -1.978353 |
| O  | -5.192932 | -0.817596 | -1.379686 |
| O  | -4.196548 | -2.878772 | -1.404034 |
| C  | -5.370505 | -2.167109 | -1.819849 |
| C  | -6.599598 | -2.720551 | -1.130438 |
| H  | -7.482374 | -2.123911 | -1.383906 |
| H  | -6.777523 | -3.755939 | -1.439208 |
| H  | -6.465608 | -2.694556 | -0.044338 |
| C  | -5.444622 | -2.235277 | -3.331062 |
| H  | -5.483732 | -3.277597 | -3.664947 |
| H  | -6.338442 | -1.717376 | -3.694274 |
| H  | -4.561733 | -1.764202 | -3.775116 |
| Rh | -0.109382 | 0.424866  | -0.050184 |
| C  | 4.244462  | -0.240727 | 0.433876  |
| Cl | 0.991619  | 2.222897  | -1.233940 |
| Br | 1.609405  | 0.377760  | 1.824640  |
| H  | 4.541144  | -1.070900 | 1.077601  |
| C  | 3.351028  | -0.581980 | -0.703171 |
| H  | 2.617348  | -1.333620 | -0.382045 |
| C  | 4.890100  | 1.002494  | 0.636037  |
| C  | 5.923507  | 1.097817  | 1.602339  |
| C  | 4.541658  | 2.173471  | -0.084722 |
| C  | 6.591793  | 2.289858  | 1.816301  |
| H  | 6.192000  | 0.207021  | 2.170049  |
| C  | 5.212645  | 3.360933  | 0.141190  |
| H  | 3.709640  | 2.147237  | -0.787313 |
| C  | 6.243391  | 3.427975  | 1.084008  |
| H  | 7.388834  | 2.340664  | 2.556065  |
| H  | 4.925162  | 4.251370  | -0.414600 |
| H  | 6.765921  | 4.367628  | 1.255408  |
| H  | 2.779245  | 0.287675  | -1.057374 |
| C  | 4.062439  | -1.175146 | -1.917744 |
| Cl | 5.020663  | -2.628750 | -1.454863 |
| Cl | 2.815433  | -1.672666 | -3.123632 |

C1 5.158934 0.009817 -2.678266

**17-TS-S3**

M06L SCF energy: -6903.88693596 a.u.  
M06L enthalpy: -6903.131464 a.u.  
M06L free energy: -6903.271735 a.u.  
M06 SCF energy in solution: -6906.11472130 a.u.  
M06 enthalpy in solution: -6905.359249 a.u.  
M06 free energy in solution: -6905.499520 a.u.  
Imaginary frequency: -36.4105 cm<sup>-1</sup>

Cartesian coordinates

| ATOM | X         | Y         | Z         |
|------|-----------|-----------|-----------|
| H    | 2.885304  | 1.829006  | -1.626493 |
| C    | 2.992355  | 1.992929  | -0.545753 |
| H    | 3.234451  | 3.055324  | -0.404003 |
| C    | 4.152497  | 1.175601  | -0.027790 |
| H    | 4.220849  | 1.269108  | 1.074392  |
| C    | 4.209881  | -0.301846 | -0.385938 |
| C    | 3.414606  | -1.229886 | 0.509833  |
| H    | 3.309459  | -0.784669 | 1.508964  |
| H    | 3.967723  | -2.171676 | 0.625643  |
| P    | 1.348233  | 1.668506  | 0.249407  |
| P    | 1.748425  | -1.638101 | -0.165994 |
| C    | 0.473783  | 3.226024  | -0.146779 |
| C    | -0.909396 | 5.582695  | -0.752665 |
| C    | 0.752799  | 3.931946  | -1.323671 |
| C    | -0.523269 | 3.705466  | 0.713889  |
| C    | -1.209095 | 4.874475  | 0.409265  |
| C    | 0.069917  | 5.108179  | -1.619698 |
| H    | 1.509817  | 3.568621  | -2.017250 |
| H    | -0.767951 | 3.149890  | 1.617490  |
| H    | -1.987226 | 5.231695  | 1.081572  |
| H    | 0.303993  | 5.651648  | -2.533975 |
| H    | -1.449244 | 6.498891  | -0.987834 |
| C    | 1.730597  | 1.809929  | 2.032630  |
| C    | 2.398298  | 1.929513  | 4.743935  |
| C    | 2.355071  | 2.948901  | 2.557163  |
| C    | 1.432264  | 0.739984  | 2.882133  |
| C    | 1.770745  | 0.797705  | 4.231810  |
| C    | 2.686171  | 3.007361  | 3.906488  |
| H    | 2.576814  | 3.796244  | 1.906781  |
| H    | 0.913552  | -0.131364 | 2.478304  |
| H    | 1.530445  | -0.042196 | 4.882018  |

|    |           |           |           |
|----|-----------|-----------|-----------|
| H  | 3.168484  | 3.896983  | 4.308061  |
| H  | 2.659502  | 1.977976  | 5.799625  |
| C  | 1.077262  | -2.778459 | 1.096832  |
| C  | -0.083565 | -4.471989 | 3.003202  |
| C  | 1.674516  | -2.951675 | 2.352350  |
| C  | -0.114830 | -3.461247 | 0.809978  |
| C  | -0.681916 | -4.307440 | 1.754992  |
| C  | 1.093626  | -3.792345 | 3.299235  |
| H  | 2.599256  | -2.436047 | 2.605902  |
| H  | -0.602956 | -3.309300 | -0.153417 |
| H  | -1.602675 | -4.836958 | 1.516089  |
| H  | 1.569435  | -3.917529 | 4.270598  |
| H  | -0.536153 | -5.128252 | 3.744482  |
| C  | 2.208396  | -2.716652 | -1.568210 |
| C  | 3.049048  | -4.295524 | -3.710651 |
| C  | 2.779529  | -3.973418 | -1.336616 |
| C  | 2.054112  | -2.260927 | -2.880071 |
| C  | 2.478137  | -3.047916 | -3.947197 |
| C  | 3.196154  | -4.760133 | -2.405171 |
| H  | 2.886902  | -4.342044 | -0.315248 |
| H  | 1.567348  | -1.301137 | -3.054918 |
| H  | 2.347827  | -2.690093 | -4.966822 |
| H  | 3.633142  | -5.739625 | -2.218911 |
| H  | 3.371592  | -4.913631 | -4.546790 |
| H  | 3.930504  | -0.434265 | -1.451236 |
| O  | 5.592120  | -0.571066 | -0.207489 |
| O  | 5.339369  | 1.664193  | -0.633450 |
| C  | 6.310081  | 0.610233  | -0.576667 |
| C  | 7.333688  | 0.885110  | 0.504993  |
| H  | 8.016024  | 0.034728  | 0.609859  |
| H  | 7.921289  | 1.775939  | 0.259792  |
| H  | 6.833173  | 1.045821  | 1.465278  |
| C  | 6.915275  | 0.461919  | -1.956945 |
| H  | 7.380837  | 1.401346  | -2.273797 |
| H  | 7.677511  | -0.324196 | -1.958207 |
| H  | 6.139493  | 0.199297  | -2.683374 |
| Rh | 0.169086  | -0.089856 | -0.460665 |
| C  | -4.068450 | 0.369514  | -0.653015 |
| Cl | -1.122386 | -1.507685 | -1.928616 |
| Br | -1.745929 | 0.455364  | 1.113962  |
| C  | -3.885605 | 1.642828  | -1.240086 |
| C  | -2.850091 | 1.807960  | -2.197543 |
| C  | -4.673977 | 2.772251  | -0.908671 |
| C  | -2.634630 | 3.034562  | -2.798517 |



|    |           |           |           |
|----|-----------|-----------|-----------|
| H  | -2.231312 | 0.943507  | -2.444436 |
| C  | -4.452178 | 3.993512  | -1.522068 |
| H  | -5.464713 | 2.679922  | -0.165002 |
| C  | -3.436951 | 4.131938  | -2.472155 |
| H  | -1.834302 | 3.144885  | -3.528617 |
| H  | -5.073315 | 4.849382  | -1.262115 |
| H  | -3.266301 | 5.094837  | -2.951666 |
| H  | -3.455668 | -0.452702 | -1.025763 |
| C  | -5.152414 | 0.041645  | 0.314080  |
| H  | -6.080140 | 0.579814  | 0.073090  |
| H  | -4.884100 | 0.329975  | 1.341085  |
| C  | -5.503228 | -1.439566 | 0.346297  |
| Cl | -4.097231 | -2.417015 | 0.834825  |
| Cl | -6.054589 | -1.967033 | -1.276677 |
| Cl | -6.837385 | -1.690820 | 1.526884  |

#### 17-TS-S4

|                              |                           |
|------------------------------|---------------------------|
| M06L SCF energy:             | -6903.89639956 a.u.       |
| M06L enthalpy:               | -6903.140704 a.u.         |
| M06L free energy:            | -6903.280173 a.u.         |
| M06 SCF energy in solution:  | -6906.12141776 a.u.       |
| M06 enthalpy in solution:    | -6905.365722 a.u.         |
| M06 free energy in solution: | -6905.505191 a.u.         |
| Imaginary frequency:         | -56.1269 cm <sup>-1</sup> |

#### Cartesian coordinates

| ATOM | X         | Y         | Z         |
|------|-----------|-----------|-----------|
| H    | -3.682890 | 0.130949  | 1.309528  |
| C    | -3.636093 | -0.389488 | 0.342280  |
| H    | -4.650890 | -0.398655 | -0.074984 |
| C    | -3.175854 | -1.833478 | 0.519274  |
| H    | -2.407985 | -2.095946 | -0.235855 |
| C    | -2.657335 | -2.197395 | 1.913359  |
| C    | -1.167601 | -2.015352 | 2.164128  |
| H    | -0.625130 | -2.746005 | 1.548062  |
| H    | -0.931743 | -2.240488 | 3.213550  |
| P    | -2.518518 | 0.540079  | -0.797692 |
| P    | -0.497019 | -0.371621 | 1.668065  |
| C    | -3.126553 | 2.257731  | -0.705601 |
| C    | -3.932729 | 4.932631  | -0.559236 |
| C    | -4.338529 | 2.600015  | -0.093769 |
| C    | -2.319961 | 3.270095  | -1.244508 |
| C    | -2.725348 | 4.598589  | -1.171606 |
| C    | -4.738416 | 3.932223  | -0.022811 |

|   |           |           |           |
|---|-----------|-----------|-----------|
| H | -4.978456 | 1.830594  | 0.336312  |
| H | -1.372454 | 3.001959  | -1.716872 |
| H | -2.092226 | 5.376824  | -1.593992 |
| H | -5.682350 | 4.186677  | 0.456818  |
| H | -4.245481 | 5.973872  | -0.500917 |
| C | -3.109844 | -0.076555 | -2.417145 |
| C | -4.116075 | -1.144426 | -4.794520 |
| C | -4.279946 | 0.439889  | -2.984235 |
| C | -2.443402 | -1.129273 | -3.053930 |
| C | -2.950971 | -1.662593 | -4.235351 |
| C | -4.778075 | -0.090377 | -4.169795 |
| H | -4.799947 | 1.267698  | -2.501354 |
| H | -1.510074 | -1.509363 | -2.635198 |
| H | -2.422160 | -2.476456 | -4.727593 |
| H | -5.684389 | 0.324232  | -4.608202 |
| H | -4.504853 | -1.556702 | -5.724166 |
| C | 1.148856  | -0.321405 | 2.468155  |
| C | 3.747098  | -0.163032 | 3.502706  |
| C | 1.927861  | -1.477308 | 2.608078  |
| C | 1.689934  | 0.912812  | 2.848991  |
| C | 2.982453  | 0.992301  | 3.359270  |
| C | 3.214968  | -1.396740 | 3.129797  |
| H | 1.537664  | -2.441284 | 2.288630  |
| H | 1.101298  | 1.822634  | 2.734784  |
| H | 3.393856  | 1.961778  | 3.634509  |
| H | 3.811584  | -2.302501 | 3.228599  |
| H | 4.760183  | -0.101591 | 3.897814  |
| C | -1.440949 | 0.853141  | 2.645963  |
| C | -2.873543 | 2.807327  | 4.048457  |
| C | -2.076552 | 0.536145  | 3.853109  |
| C | -1.511596 | 2.166812  | 2.166628  |
| C | -2.221674 | 3.139868  | 2.864138  |
| C | -2.794639 | 1.507100  | 4.545116  |
| H | -2.013182 | -0.474054 | 4.257577  |
| H | -1.011533 | 2.417112  | 1.228206  |
| H | -2.276797 | 4.152879  | 2.468734  |
| H | -3.296169 | 1.246632  | 5.475653  |
| H | -3.441318 | 3.562277  | 4.589444  |
| H | -3.237788 | -1.618275 | 2.656433  |
| O | -2.976354 | -3.572980 | 2.040182  |
| O | -4.294238 | -2.698829 | 0.399709  |
| C | -3.900910 | -3.927102 | 0.994577  |
| C | -3.183256 | -4.818835 | -0.005570 |
| H | -2.822354 | -5.728107 | 0.486796  |

|    |           |           |           |
|----|-----------|-----------|-----------|
| H  | -3.858494 | -5.104298 | -0.819721 |
| H  | -2.316390 | -4.305495 | -0.437810 |
| C  | -5.124274 | -4.573695 | 1.599585  |
| H  | -5.851629 | -4.822993 | 0.819856  |
| H  | -4.845521 | -5.493753 | 2.122907  |
| H  | -5.592625 | -3.889205 | 2.312807  |
| Rh | -0.343406 | 0.051533  | -0.523926 |
| Br | 1.359469  | -1.806673 | -0.805162 |
| C  | 3.677274  | -0.359677 | -1.300513 |
| Cl | 0.229660  | 1.084892  | -2.630270 |
| H  | 3.324429  | -0.289342 | -2.329177 |
| C  | 4.720465  | -1.284078 | -1.027922 |
| C  | 5.159782  | -2.144126 | -2.064047 |
| C  | 5.335603  | -1.406133 | 0.241256  |
| C  | 6.163040  | -3.070498 | -1.844916 |
| H  | 4.685793  | -2.065043 | -3.041871 |
| C  | 6.335962  | -2.338894 | 0.453551  |
| H  | 5.016058  | -0.758875 | 1.055654  |
| C  | 6.756858  | -3.174682 | -0.584129 |
| H  | 6.488198  | -3.719630 | -2.655667 |
| H  | 6.797210  | -2.419377 | 1.436889  |
| H  | 7.544380  | -3.905685 | -0.410917 |
| C  | 3.215767  | 0.731476  | -0.400536 |
| H  | 2.161604  | 0.943801  | -0.630305 |
| H  | 3.275100  | 0.460047  | 0.661532  |
| C  | 3.941872  | 2.064626  | -0.573259 |
| Cl | 3.965820  | 2.560994  | -2.286464 |
| Cl | 5.631296  | 1.970846  | 0.034242  |
| Cl | 3.065290  | 3.317356  | 0.383436  |

### 17-TS-S5

|                              |                           |
|------------------------------|---------------------------|
| M06L SCF energy:             | -6903.89455207 a.u.       |
| M06L enthalpy:               | -6903.139143 a.u.         |
| M06L free energy:            | -6903.278610 a.u.         |
| M06 SCF energy in solution:  | -6906.11785103 a.u.       |
| M06 enthalpy in solution:    | -6905.362442 a.u.         |
| M06 free energy in solution: | -6905.501909 a.u.         |
| Imaginary frequency:         | -80.1474 cm <sup>-1</sup> |

### Cartesian coordinates

| ATOM | X        | Y         | Z         |
|------|----------|-----------|-----------|
| H    | 3.909348 | 0.236443  | 0.308966  |
| C    | 3.519973 | -0.676114 | -0.164663 |
| H    | 4.296248 | -1.447037 | -0.081282 |

|   |           |           |           |
|---|-----------|-----------|-----------|
| C | 3.227241  | -0.452876 | -1.642907 |
| H | 2.266345  | -0.925706 | -1.929203 |
| C | 3.226609  | 1.004223  | -2.099985 |
| C | 1.908415  | 1.750485  | -2.021419 |
| H | 1.203594  | 1.288539  | -2.726758 |
| H | 2.051069  | 2.788770  | -2.350484 |
| P | 2.013599  | -1.266897 | 0.725694  |
| P | 1.048136  | 1.721852  | -0.382659 |
| C | 2.556580  | -1.362069 | 2.468179  |
| C | 3.282693  | -1.455846 | 5.170774  |
| C | 3.899436  | -1.241144 | 2.847279  |
| C | 1.579538  | -1.528551 | 3.460084  |
| C | 1.944115  | -1.577261 | 4.801340  |
| C | 4.258651  | -1.288803 | 4.192119  |
| H | 4.675735  | -1.105551 | 2.095918  |
| H | 0.533415  | -1.623600 | 3.164390  |
| H | 1.177198  | -1.711828 | 5.561911  |
| H | 5.306286  | -1.194900 | 4.473610  |
| H | 3.565356  | -1.491376 | 6.221492  |
| C | 1.998944  | -3.001083 | 0.132791  |
| C | 2.147420  | -5.579180 | -0.933490 |
| C | 2.877026  | -3.942300 | 0.680293  |
| C | 1.189381  | -3.363716 | -0.949300 |
| C | 1.270392  | -4.646637 | -1.481720 |
| C | 2.947122  | -5.227107 | 0.150740  |
| H | 3.503695  | -3.672366 | 1.531014  |
| H | 0.476422  | -2.643943 | -1.354511 |
| H | 0.633686  | -4.920704 | -2.320787 |
| H | 3.627454  | -5.955287 | 0.589049  |
| H | 2.202955  | -6.584864 | -1.347000 |
| C | -0.035211 | 3.194878  | -0.574878 |
| C | -1.496497 | 5.554526  | -0.976552 |
| C | -0.727587 | 3.409408  | -1.774938 |
| C | -0.114332 | 4.164691  | 0.431588  |
| C | -0.836168 | 5.337284  | 0.228798  |
| C | -1.448775 | 4.582386  | -1.972871 |
| H | -0.700354 | 2.656569  | -2.560048 |
| H | 0.408511  | 4.015068  | 1.375696  |
| H | -0.878952 | 6.084954  | 1.019826  |
| H | -1.968806 | 4.738762  | -2.916637 |
| H | -2.051059 | 6.477661  | -1.138712 |
| C | 2.292018  | 2.345679  | 0.807228  |
| C | 4.151308  | 3.243266  | 2.698178  |
| C | 3.304121  | 3.240750  | 0.437226  |

|    |           |           |           |
|----|-----------|-----------|-----------|
| C  | 2.206611  | 1.933395  | 2.140990  |
| C  | 3.131843  | 2.377079  | 3.082868  |
| C  | 4.231396  | 3.680983  | 1.376439  |
| H  | 3.366882  | 3.600624  | -0.589954 |
| H  | 1.406945  | 1.250075  | 2.433633  |
| H  | 3.059979  | 2.030044  | 4.112603  |
| H  | 5.021313  | 4.366925  | 1.075399  |
| H  | 4.882918  | 3.584446  | 3.428489  |
| H  | 4.003004  | 1.544254  | -1.525992 |
| O  | 3.622987  | 0.925252  | -3.460621 |
| O  | 4.284024  | -0.992376 | -2.419989 |
| C  | 4.172862  | -0.383855 | -3.699104 |
| C  | 3.217408  | -1.156353 | -4.593400 |
| H  | 3.081330  | -0.633384 | -5.545985 |
| H  | 3.607767  | -2.159784 | -4.795761 |
| H  | 2.232896  | -1.255204 | -4.121636 |
| C  | 5.560274  | -0.252411 | -4.281411 |
| H  | 6.008708  | -1.240400 | -4.429345 |
| H  | 5.518166  | 0.259135  | -5.248257 |
| H  | 6.195435  | 0.325361  | -3.603549 |
| Rh | 0.087357  | -0.223933 | 0.192448  |
| Br | -1.492421 | -0.049714 | -1.800074 |
| C  | -4.031398 | 0.302540  | -0.790311 |
| Cl | -1.107447 | -2.108676 | 1.186103  |
| H  | -4.483817 | 0.713862  | -1.693980 |
| C  | -3.681571 | 1.232746  | 0.224669  |
| C  | -3.924883 | 2.610121  | 0.014992  |
| C  | -3.035921 | 0.840999  | 1.422443  |
| C  | -3.569105 | 3.547267  | 0.967482  |
| H  | -4.405639 | 2.924123  | -0.911826 |
| C  | -2.651030 | 1.790735  | 2.354583  |
| H  | -2.815356 | -0.209862 | 1.599449  |
| C  | -2.921444 | 3.143948  | 2.138151  |
| H  | -3.774329 | 4.601734  | 0.793930  |
| H  | -2.137572 | 1.472021  | 3.261124  |
| H  | -2.621328 | 3.886728  | 2.876464  |
| C  | -4.169860 | -1.171524 | -0.603948 |
| H  | -3.991029 | -1.683998 | -1.555529 |
| H  | -3.435164 | -1.572961 | 0.107206  |
| C  | -5.561390 | -1.609684 | -0.141158 |
| Cl | -6.817738 | -1.003855 | -1.285851 |
| Cl | -5.933000 | -0.991103 | 1.495517  |
| Cl | -5.625046 | -3.396894 | -0.113666 |

**22**

M06L SCF energy: -6594.24837398 a.u.  
M06L enthalpy: -6593.636743 a.u.  
M06L free energy: -6593.760953 a.u.  
M06 SCF energy in solution: -6596.60165057 a.u.  
M06 enthalpy in solution: -6595.990020 a.u.  
M06 free energy in solution: -6596.114230 a.u.

## Cartesian coordinates

| ATOM | X         | Y         | Z         |
|------|-----------|-----------|-----------|
| H    | -1.933117 | -0.244221 | 2.002518  |
| C    | -2.587402 | 0.166687  | 1.220603  |
| H    | -3.330096 | 0.806522  | 1.715539  |
| C    | -3.328230 | -0.953994 | 0.504682  |
| H    | -3.484856 | -0.710333 | -0.566911 |
| C    | -2.720075 | -2.349686 | 0.620028  |
| C    | -1.652015 | -2.742882 | -0.376738 |
| H    | -2.062344 | -2.663715 | -1.391765 |
| H    | -1.382687 | -3.796005 | -0.217981 |
| P    | -1.600087 | 1.228216  | 0.081893  |
| P    | -0.131135 | -1.693238 | -0.296405 |
| C    | -0.794917 | 2.433442  | 1.187861  |
| C    | 0.566042  | 4.277592  | 2.789996  |
| C    | -0.996908 | 2.451251  | 2.573956  |
| C    | 0.097941  | 3.349492  | 0.611923  |
| C    | 0.769009  | 4.266814  | 1.411203  |
| C    | -0.316955 | 3.370631  | 3.369235  |
| H    | -1.683247 | 1.749025  | 3.045130  |
| H    | 0.278137  | 3.320411  | -0.464719 |
| H    | 1.468288  | 4.964484  | 0.954859  |
| H    | -0.480199 | 3.375606  | 4.445755  |
| H    | 1.102390  | 4.989525  | 3.414996  |
| C    | -2.929807 | 2.159888  | -0.759758 |
| C    | -5.047700 | 3.488093  | -2.000549 |
| C    | -3.633647 | 3.157536  | -0.074753 |
| C    | -3.292308 | 1.835907  | -2.070400 |
| C    | -4.351819 | 2.495668  | -2.685520 |
| C    | -4.686876 | 3.820223  | -0.696228 |
| H    | -3.346882 | 3.426008  | 0.943030  |
| H    | -2.713040 | 1.089143  | -2.614049 |
| H    | -4.621527 | 2.244697  | -3.709452 |
| H    | -5.222713 | 4.603303  | -0.162824 |
| H    | -5.868825 | 4.011833  | -2.486888 |
| C    | 1.058343  | -2.601144 | -1.334473 |

|    |           |           |           |
|----|-----------|-----------|-----------|
| C  | 2.935842  | -3.693785 | -3.095655 |
| C  | 0.687269  | -2.951291 | -2.641599 |
| C  | 2.384630  | -2.790822 | -0.926123 |
| C  | 3.315640  | -3.335395 | -1.803531 |
| C  | 1.620972  | -3.502451 | -3.512880 |
| H  | -0.333884 | -2.780933 | -2.984686 |
| H  | 2.692465  | -2.490766 | 0.074699  |
| H  | 4.345602  | -3.469492 | -1.476877 |
| H  | 1.322285  | -3.772993 | -4.523791 |
| H  | 3.668318  | -4.113891 | -3.782188 |
| C  | 0.428100  | -1.943176 | 1.425839  |
| C  | 1.227454  | -2.294673 | 4.083637  |
| C  | 0.613258  | -3.231486 | 1.946022  |
| C  | 0.654982  | -0.837800 | 2.251165  |
| C  | 1.048621  | -1.011759 | 3.574988  |
| C  | 1.012157  | -3.404563 | 3.267276  |
| H  | 0.455893  | -4.103963 | 1.310310  |
| H  | 0.538809  | 0.167094  | 1.845924  |
| H  | 1.227669  | -0.139294 | 4.201393  |
| H  | 1.156896  | -4.408647 | 3.661889  |
| H  | 1.541262  | -2.433672 | 5.116793  |
| Cl | 0.025872  | 2.039993  | -2.855415 |
| H  | -2.337054 | -2.476045 | 1.653061  |
| O  | -3.848211 | -3.181402 | 0.409315  |
| O  | -4.574316 | -1.143671 | 1.155150  |
| C  | -5.001149 | -2.484871 | 0.900356  |
| C  | -6.059312 | -2.517502 | -0.182950 |
| H  | -6.311378 | -3.551977 | -0.439329 |
| H  | -6.968813 | -2.009101 | 0.153865  |
| H  | -5.693210 | -2.018469 | -1.086013 |
| C  | -5.464045 | -3.080001 | 2.213298  |
| H  | -6.286380 | -2.490071 | 2.632005  |
| H  | -5.811355 | -4.107938 | 2.065799  |
| H  | -4.640638 | -3.086183 | 2.934595  |
| Rh | -0.182041 | 0.293735  | -1.294460 |
| Br | 2.375270  | 0.766428  | -0.287913 |
| C  | 4.405026  | 0.690261  | 0.224117  |
| Cl | 4.654616  | -0.694885 | 1.327682  |
| Cl | 5.370554  | 0.470638  | -1.244514 |
| Cl | 4.851748  | 2.198119  | 1.047233  |

### 23-TS

|                   |                     |
|-------------------|---------------------|
| M06L SCF energy:  | -6594.23476824 a.u. |
| M06L enthalpy:    | -6593.624790 a.u.   |
| M06L free energy: | -6593.751042 a.u.   |

M06 SCF energy in solution: -6596.58350134 a.u.  
M06 enthalpy in solution: -6595.973523 a.u.  
M06 free energy in solution: -6596.099775 a.u.  
Imaginary frequency: -53.2840 cm<sup>-1</sup>

Cartesian coordinates

| ATOM | X         | Y         | Z         |
|------|-----------|-----------|-----------|
| H    | 0.672310  | 2.159866  | -2.023489 |
| C    | 0.792938  | 2.531866  | -0.996909 |
| H    | 0.421541  | 3.565419  | -0.997305 |
| C    | 2.262666  | 2.550373  | -0.644024 |
| H    | 2.399802  | 2.929824  | 0.387683  |
| C    | 3.056689  | 1.259239  | -0.778399 |
| C    | 3.001631  | 0.314505  | 0.407503  |
| H    | 2.745464  | 0.855050  | 1.330032  |
| H    | 4.001237  | -0.117213 | 0.546898  |
| P    | -0.317807 | 1.510681  | 0.086051  |
| P    | 1.821157  | -1.080657 | 0.144193  |
| C    | -1.910731 | 2.333487  | -0.268847 |
| C    | -4.322734 | 3.601914  | -0.892386 |
| C    | -2.742141 | 2.806833  | 0.750664  |
| C    | -2.314127 | 2.475148  | -1.602235 |
| C    | -3.512199 | 3.109287  | -1.911903 |
| C    | -3.939368 | 3.443022  | 0.436624  |
| H    | -2.451912 | 2.675691  | 1.791963  |
| H    | -1.692370 | 2.077985  | -2.405767 |
| H    | -3.815547 | 3.210861  | -2.952400 |
| H    | -4.578397 | 3.810654  | 1.237637  |
| H    | -5.261449 | 4.097898  | -1.133893 |
| C    | 0.116494  | 2.041501  | 1.778705  |
| C    | 0.892623  | 2.790008  | 4.359569  |
| C    | 0.260779  | 1.077552  | 2.782472  |
| C    | 0.347868  | 3.389534  | 2.087087  |
| C    | 0.733588  | 3.760552  | 3.370378  |
| C    | 0.652101  | 1.451019  | 4.066250  |
| H    | 0.057263  | 0.031138  | 2.552206  |
| H    | 0.222318  | 4.153726  | 1.318842  |
| H    | 0.914500  | 4.809246  | 3.599354  |
| H    | 0.768265  | 0.688332  | 4.834294  |
| H    | 1.200783  | 3.082698  | 5.361864  |
| C    | 1.881983  | -1.978195 | 1.734342  |
| C    | 1.843412  | -3.354247 | 4.171723  |
| C    | 2.842363  | -1.706111 | 2.718104  |
| C    | 0.899687  | -2.947206 | 1.986866  |



|    |           |           |           |
|----|-----------|-----------|-----------|
| C  | 0.886584  | -3.629916 | 3.197825  |
| C  | 2.821423  | -2.393089 | 3.929638  |
| H  | 3.611084  | -0.953450 | 2.550949  |
| H  | 0.141573  | -3.155143 | 1.231803  |
| H  | 0.116777  | -4.376831 | 3.380464  |
| H  | 3.573148  | -2.173050 | 4.685889  |
| H  | 1.826560  | -3.886389 | 5.121505  |
| C  | 2.784065  | -2.083444 | -1.043129 |
| C  | 4.342194  | -3.477498 | -2.892040 |
| C  | 3.885150  | -2.831515 | -0.613877 |
| C  | 2.466054  | -2.043423 | -2.403861 |
| C  | 3.247235  | -2.733903 | -3.324897 |
| C  | 4.659298  | -3.527794 | -1.536642 |
| H  | 4.130263  | -2.879143 | 0.448039  |
| H  | 1.581512  | -1.495597 | -2.729803 |
| H  | 2.987484  | -2.705793 | -4.381257 |
| H  | 5.509354  | -4.115983 | -1.195432 |
| H  | 4.945668  | -4.027596 | -3.612087 |
| H  | 2.763763  | 0.741148  | -1.715573 |
| O  | 4.376270  | 1.768104  | -0.899480 |
| O  | 2.921661  | 3.402591  | -1.567618 |
| C  | 4.287928  | 2.969808  | -1.665288 |
| C  | 5.209883  | 3.990952  | -1.036449 |
| H  | 6.243042  | 3.627460  | -1.038386 |
| H  | 5.170803  | 4.933201  | -1.592636 |
| H  | 4.909446  | 4.179954  | -0.001094 |
| C  | 4.589078  | 2.701656  | -3.126607 |
| H  | 4.406802  | 3.600245  | -3.725621 |
| H  | 5.634037  | 2.400059  | -3.255264 |
| H  | 3.945369  | 1.900969  | -3.506431 |
| Rh | -0.345350 | -0.699135 | -0.348109 |
| Br | -2.432905 | -0.896003 | 1.056921  |
| Cl | -0.565512 | -2.901463 | -1.257618 |
| C  | -4.494991 | -1.058037 | -0.923423 |
| Cl | -3.463517 | -0.862096 | -2.282708 |
| Cl | -5.194939 | -2.615209 | -0.729562 |
| Cl | -5.511697 | 0.282107  | -0.545298 |

#### 24-TS

|                             |                     |
|-----------------------------|---------------------|
| M06L SCF energy:            | -6594.21959585 a.u. |
| M06L enthalpy:              | -6593.608996 a.u.   |
| M06L free energy:           | -6593.729852 a.u.   |
| M06 SCF energy in solution: | -6596.55979009 a.u. |
| M06 enthalpy in solution:   | -6595.949190 a.u.   |

M06 free energy in solution: -6596.070046 a.u.  
Imaginary frequency: -87.2679 cm<sup>-1</sup>

Cartesian coordinates

| ATOM | X         | Y         | Z         |
|------|-----------|-----------|-----------|
| H    | -2.338703 | 1.609662  | 1.115274  |
| C    | -2.416353 | 0.512742  | 1.112044  |
| H    | -3.475742 | 0.261348  | 1.245976  |
| C    | -1.642105 | -0.094234 | 2.269469  |
| H    | -1.122058 | -1.025739 | 1.959039  |
| C    | -0.645613 | 0.837021  | 2.949647  |
| C    | 0.759980  | 0.867716  | 2.391142  |
| H    | 1.205094  | -0.124276 | 2.530693  |
| H    | 1.370848  | 1.563359  | 2.981704  |
| P    | -1.857205 | -0.151244 | -0.518291 |
| P    | 0.969367  | 1.292438  | 0.598159  |
| C    | -2.823791 | 0.866683  | -1.694569 |
| C    | -4.179065 | 2.501518  | -3.525432 |
| C    | -3.938656 | 1.615129  | -1.293957 |
| C    | -2.396402 | 0.949604  | -3.027462 |
| C    | -3.071882 | 1.760329  | -3.933614 |
| C    | -4.612009 | 2.425308  | -2.204781 |
| H    | -4.288982 | 1.577457  | -0.263865 |
| H    | -1.532270 | 0.366326  | -3.348416 |
| H    | -2.728316 | 1.812169  | -4.965107 |
| H    | -5.476385 | 3.000711  | -1.877598 |
| H    | -4.704515 | 3.137815  | -4.235823 |
| C    | -2.673730 | -1.786874 | -0.462503 |
| C    | -3.906195 | -4.278314 | -0.191170 |
| C    | -4.047981 | -1.919297 | -0.678070 |
| C    | -1.921626 | -2.912215 | -0.113897 |
| C    | -2.536383 | -4.151531 | 0.027801  |
| C    | -4.660212 | -3.162670 | -0.546530 |
| H    | -4.640547 | -1.049666 | -0.964857 |
| H    | -0.843578 | -2.813229 | 0.018480  |
| H    | -1.939306 | -5.022208 | 0.293451  |
| H    | -5.729441 | -3.260304 | -0.726919 |
| H    | -4.386206 | -5.250338 | -0.091025 |
| C    | 2.730318  | 1.774499  | 0.614119  |
| C    | 5.461903  | 2.354610  | 0.481966  |
| C    | 3.662410  | 0.944978  | 1.247090  |
| C    | 3.179956  | 2.893598  | -0.091019 |
| C    | 4.539646  | 3.182207  | -0.153345 |
| C    | 5.020416  | 1.235932  | 1.183943  |

|    |           |           |           |
|----|-----------|-----------|-----------|
| H  | 3.329970  | 0.051894  | 1.777864  |
| H  | 2.463784  | 3.536172  | -0.602663 |
| H  | 4.879270  | 4.056002  | -0.706615 |
| H  | 5.735804  | 0.578425  | 1.675270  |
| H  | 6.525470  | 2.579492  | 0.426703  |
| C  | 0.093823  | 2.889737  | 0.420046  |
| C  | -1.306029 | 5.288284  | 0.065905  |
| C  | 0.025586  | 3.830932  | 1.456011  |
| C  | -0.526188 | 3.179799  | -0.800375 |
| C  | -1.226137 | 4.370717  | -0.977560 |
| C  | -0.672730 | 5.020803  | 1.279260  |
| H  | 0.522454  | 3.636182  | 2.406928  |
| H  | -0.464743 | 2.453739  | -1.613475 |
| H  | -1.715508 | 4.569348  | -1.929771 |
| H  | -0.726184 | 5.741837  | 2.093028  |
| H  | -1.858679 | 6.217136  | -0.064881 |
| H  | -1.076314 | 1.856680  | 2.958603  |
| O  | -0.583362 | 0.332849  | 4.275258  |
| O  | -2.540404 | -0.368711 | 3.332312  |
| C  | -1.752439 | -0.473610 | 4.510091  |
| C  | -1.303352 | -1.905545 | 4.741764  |
| H  | -0.603129 | -1.954680 | 5.582262  |
| H  | -2.162352 | -2.548720 | 4.960887  |
| H  | -0.795985 | -2.298238 | 3.853000  |
| C  | -2.548403 | 0.097491  | 5.661033  |
| H  | -3.467127 | -0.478368 | 5.815531  |
| H  | -1.958706 | 0.067022  | 6.582778  |
| H  | -2.817068 | 1.136508  | 5.448258  |
| Rh | 0.368700  | -0.199834 | -1.013234 |
| C  | 2.428346  | -2.526777 | -0.176104 |
| Cl | 4.152594  | -2.530715 | 0.044506  |
| Cl | 1.608286  | -2.489378 | 1.390549  |
| Cl | 1.836073  | -3.730172 | -1.229970 |
| Br | 2.668410  | -0.292179 | -1.961681 |
| Cl | -0.269282 | -1.763098 | -2.757120 |

## 25-TS

|                              |                            |
|------------------------------|----------------------------|
| M06L SCF energy:             | -6594.19445515 a.u.        |
| M06L enthalpy:               | -6593.583403 a.u.          |
| M06L free energy:            | -6593.705480 a.u.          |
| M06 SCF energy in solution:  | -6596.54732710 a.u.        |
| M06 enthalpy in solution:    | -6595.936275 a.u.          |
| M06 free energy in solution: | -6596.058352 a.u.          |
| Imaginary frequency:         | -386.3452 cm <sup>-1</sup> |

Cartesian coordinates

| ATOM | X         | Y         | Z         |
|------|-----------|-----------|-----------|
| H    | -2.756893 | 0.807623  | 1.134204  |
| C    | -2.340239 | -0.194798 | 1.312017  |
| H    | -3.177636 | -0.821425 | 1.643925  |
| C    | -1.290359 | -0.167482 | 2.415268  |
| H    | -0.376066 | -0.710554 | 2.103276  |
| C    | -0.881863 | 1.209917  | 2.928970  |
| C    | 0.324907  | 1.812740  | 2.236305  |
| H    | 1.197499  | 1.209672  | 2.508182  |
| H    | 0.520405  | 2.826472  | 2.610147  |
| P    | -1.731880 | -0.812844 | -0.311082 |
| P    | 0.257223  | 1.852910  | 0.390387  |
| C    | -3.248767 | -0.666903 | -1.324406 |
| C    | -5.632771 | -0.425949 | -2.766325 |
| C    | -4.426896 | -1.266821 | -0.856251 |
| C    | -3.274542 | 0.034734  | -2.531697 |
| C    | -4.463803 | 0.155509  | -3.246660 |
| C    | -5.611758 | -1.144220 | -1.572093 |
| H    | -4.412553 | -1.852267 | 0.063924  |
| H    | -2.350321 | 0.445501  | -2.932219 |
| H    | -4.469813 | 0.696797  | -4.191238 |
| H    | -6.519325 | -1.616243 | -1.200120 |
| H    | -6.560446 | -0.333059 | -3.328477 |
| C    | -1.549346 | -2.610395 | -0.068626 |
| C    | -1.137656 | -5.364888 | 0.189250  |
| C    | -1.483804 | -3.427438 | -1.207059 |
| C    | -1.418808 | -3.189077 | 1.200879  |
| C    | -1.211810 | -4.561250 | 1.322634  |
| C    | -1.283655 | -4.795926 | -1.074928 |
| H    | -1.558894 | -2.978270 | -2.196763 |
| H    | -1.492638 | -2.591090 | 2.107454  |
| H    | -1.109008 | -5.000874 | 2.313011  |
| H    | -1.232626 | -5.418810 | -1.965763 |
| H    | -0.969090 | -6.435522 | 0.290113  |
| C    | 1.714029  | 2.878986  | -0.006609 |
| C    | 4.012281  | 4.250728  | -0.819533 |
| C    | 2.908334  | 2.747768  | 0.712109  |
| C    | 1.685678  | 3.699922  | -1.141158 |
| C    | 2.828123  | 4.384361  | -1.541240 |
| C    | 4.049141  | 3.434234  | 0.307593  |
| H    | 2.963711  | 2.093301  | 1.580510  |
| H    | 0.762885  | 3.805532  | -1.712341 |

|    |           |           |           |
|----|-----------|-----------|-----------|
| H  | 2.793560  | 5.021759  | -2.422613 |
| H  | 4.973438  | 3.315709  | 0.869038  |
| H  | 4.908062  | 4.779877  | -1.138222 |
| C  | -1.167140 | 2.950995  | 0.041863  |
| C  | -3.368646 | 4.556834  | -0.612817 |
| C  | -1.664213 | 3.883823  | 0.961283  |
| C  | -1.778409 | 2.851375  | -1.213865 |
| C  | -2.871603 | 3.646840  | -1.542029 |
| C  | -2.760617 | 4.677074  | 0.635131  |
| H  | -1.196426 | 3.999633  | 1.937974  |
| H  | -1.382102 | 2.135396  | -1.938161 |
| H  | -3.337910 | 3.546703  | -2.520461 |
| H  | -3.142365 | 5.392093  | 1.361379  |
| H  | -4.229965 | 5.174175  | -0.860362 |
| H  | -1.749753 | 1.892011  | 2.864755  |
| O  | -0.562411 | 0.981026  | 4.291659  |
| O  | -1.841379 | -0.763841 | 3.580053  |
| C  | -1.033213 | -0.325581 | 4.666759  |
| C  | 0.160833  | -1.244830 | 4.860158  |
| H  | 0.841435  | -0.834645 | 5.613171  |
| H  | -0.166546 | -2.237671 | 5.188253  |
| H  | 0.721966  | -1.361369 | 3.925289  |
| C  | -1.907946 | -0.215118 | 5.891930  |
| H  | -2.313774 | -1.195304 | 6.163106  |
| H  | -1.327113 | 0.166360  | 6.737486  |
| H  | -2.738114 | 0.469556  | 5.695921  |
| Rh | 0.176815  | 0.096822  | -1.077648 |
| Cl | -0.119737 | -0.962896 | -3.217830 |
| Cl | 2.339856  | -0.857352 | 1.274914  |
| Cl | 1.818738  | -2.686408 | -0.968793 |
| Cl | 2.637627  | 0.142027  | -1.558286 |
| Br | 4.970564  | -1.730048 | -0.466344 |
| C  | 2.259536  | -1.131188 | -0.433771 |

### 26-TS-R

|                              |                           |
|------------------------------|---------------------------|
| B3LYP SCF energy:            | -6904.30490975 a.u.       |
| B3LYP enthalpy:              | -6903.549763 a.u.         |
| B3LYP free energy:           | -6903.695411 a.u.         |
| M06 SCF energy in solution:  | -6906.11697837 a.u.       |
| M06 enthalpy in solution:    | -6905.361832 a.u.         |
| M06 free energy in solution: | -6905.507480 a.u.         |
| Imaginary frequency:         | -31.5835 cm <sup>-1</sup> |

Cartesian coordinates

| ATOM | X         | Y         | Z         |
|------|-----------|-----------|-----------|
| H    | 3.575135  | 0.323733  | 0.994466  |
| C    | 2.751125  | 0.805413  | 1.532816  |
| H    | 3.185069  | 1.598898  | 2.147558  |
| C    | 2.098539  | -0.186751 | 2.491824  |
| H    | 1.068446  | 0.106908  | 2.738086  |
| C    | 2.123313  | -1.662858 | 2.081789  |
| C    | 0.952515  | -2.206354 | 1.271965  |
| H    | 0.012690  | -1.890138 | 1.737932  |
| H    | 0.991645  | -3.297860 | 1.342882  |
| P    | 1.651371  | 1.635093  | 0.256921  |
| P    | 0.869786  | -1.761280 | -0.545483 |
| C    | 2.963708  | 2.499549  | -0.726270 |
| C    | 5.000893  | 3.715074  | -2.245041 |
| C    | 4.086458  | 3.070591  | -0.099984 |
| C    | 2.876778  | 2.557499  | -2.126235 |
| C    | 3.890092  | 3.156759  | -2.877799 |
| C    | 5.094028  | 3.674824  | -0.852531 |
| H    | 4.182735  | 3.059525  | 0.980852  |
| H    | 1.998719  | 2.166671  | -2.628106 |
| H    | 3.799745  | 3.193710  | -3.959927 |
| H    | 5.950738  | 4.113412  | -0.347926 |
| H    | 5.786690  | 4.184371  | -2.830966 |
| C    | 0.831223  | 2.943577  | 1.273396  |
| C    | -0.450559 | 4.875440  | 2.868076  |
| C    | 1.156634  | 4.301135  | 1.148771  |
| C    | -0.158296 | 2.570221  | 2.197754  |
| C    | -0.789688 | 3.526833  | 2.993682  |
| C    | 0.519834  | 5.258024  | 1.941425  |
| H    | 1.895824  | 4.618059  | 0.421838  |
| H    | -0.457014 | 1.530423  | 2.293618  |
| H    | -1.551307 | 3.216668  | 3.703983  |
| H    | 0.780563  | 6.306614  | 1.825907  |
| H    | -0.945110 | 5.622310  | 3.483077  |
| C    | -0.083306 | -3.209412 | -1.188181 |
| C    | -1.514045 | -5.395449 | -2.225800 |
| C    | -1.030770 | -3.880613 | -0.402138 |
| C    | 0.130830  | -3.642904 | -2.506470 |
| C    | -0.573339 | -4.731178 | -3.016636 |
| C    | -1.743081 | -4.965681 | -0.919797 |
| H    | -1.227582 | -3.575746 | 0.620579  |
| H    | 0.847251  | -3.127955 | -3.137174 |
| H    | -0.392794 | -5.054103 | -4.038196 |
| H    | -2.473650 | -5.471484 | -0.294747 |

|    |           |           |           |
|----|-----------|-----------|-----------|
| H  | -2.065449 | -6.241392 | -2.627190 |
| C  | 2.571460  | -2.143513 | -1.160057 |
| C  | 5.148854  | -2.701624 | -2.131484 |
| C  | 3.205888  | -3.358728 | -0.846646 |
| C  | 3.240980  | -1.223735 | -1.977375 |
| C  | 4.523089  | -1.500124 | -2.461074 |
| C  | 4.486401  | -3.632001 | -1.324396 |
| H  | 2.696913  | -4.100747 | -0.237559 |
| H  | 2.758172  | -0.288729 | -2.243930 |
| H  | 5.025294  | -0.773961 | -3.094058 |
| H  | 4.965807  | -4.573724 | -1.071230 |
| H  | 6.145984  | -2.918298 | -2.504981 |
| H  | 3.074536  | -1.879527 | 1.573547  |
| O  | 2.090384  | -2.324589 | 3.348268  |
| O  | 2.888772  | -0.205592 | 3.683377  |
| C  | 2.726624  | -1.480520 | 4.317399  |
| C  | 1.804381  | -1.368118 | 5.528834  |
| H  | 1.616974  | -2.358079 | 5.956964  |
| H  | 2.259135  | -0.732501 | 6.295037  |
| H  | 0.845642  | -0.932286 | 5.232454  |
| C  | 4.113057  | -2.015431 | 4.666927  |
| H  | 4.626799  | -1.326238 | 5.344880  |
| H  | 4.031422  | -2.992529 | 5.153158  |
| H  | 4.713696  | -2.121368 | 3.758617  |
| Rh | 0.180592  | 0.416848  | -1.114633 |
| C  | -2.933589 | 0.661158  | 0.161163  |
| Br | -1.250935 | -0.511755 | -2.945412 |
| Cl | -0.478604 | 2.621246  | -1.816294 |
| H  | -2.168759 | 1.040743  | 0.830670  |
| C  | -3.703718 | 1.618259  | -0.549174 |
| C  | -3.448718 | 3.003279  | -0.334462 |
| C  | -4.748909 | 1.274261  | -1.452077 |
| C  | -4.209691 | 3.977324  | -0.961065 |
| H  | -2.640138 | 3.288235  | 0.330206  |
| C  | -5.497984 | 2.256206  | -2.080916 |
| H  | -4.957576 | 0.232699  | -1.670057 |
| C  | -5.238633 | 3.612158  | -1.837756 |
| H  | -3.996486 | 5.026848  | -0.778946 |
| H  | -6.287167 | 1.970343  | -2.770790 |
| H  | -5.829429 | 4.376614  | -2.334899 |
| C  | -3.258386 | -0.797610 | 0.264524  |
| H  | -3.979536 | -1.112277 | -0.491973 |
| H  | -2.366924 | -1.412073 | 0.112383  |
| C  | -3.847318 | -1.209483 | 1.632351  |

|    |           |           |          |
|----|-----------|-----------|----------|
| C1 | -2.642950 | -0.907349 | 2.961964 |
| C1 | -4.222798 | -2.981878 | 1.615441 |
| C1 | -5.355134 | -0.307387 | 2.008955 |

**26-TS-S**

|                              |                           |
|------------------------------|---------------------------|
| B3LYP SCF energy:            | -6904.31067394 a.u.       |
| B3LYP enthalpy:              | -6903.555024 a.u.         |
| B3LYP free energy:           | -6903.698332 a.u.         |
| M06 SCF energy in solution:  | -6906.12431207 a.u.       |
| M06 enthalpy in solution:    | -6905.368662 a.u.         |
| M06 free energy in solution: | -6905.511970 a.u.         |
| Imaginary frequency:         | -21.9541 cm <sup>-1</sup> |

Cartesian coordinates

| ATOM | X         | Y         | Z         |
|------|-----------|-----------|-----------|
| H    | -3.490667 | -0.916653 | 0.885043  |
| C    | -2.614107 | -1.358393 | 1.371100  |
| H    | -2.940019 | -2.279133 | 1.863956  |
| C    | -2.093593 | -0.422047 | 2.461335  |
| H    | -1.017819 | -0.566779 | 2.641702  |
| C    | -2.387006 | 1.071278  | 2.268728  |
| C    | -1.373012 | 1.926708  | 1.519938  |
| H    | -0.380873 | 1.773419  | 1.956851  |
| H    | -1.635343 | 2.975255  | 1.694923  |
| P    | -1.387991 | -1.842263 | 0.038808  |
| P    | -1.203533 | 1.688888  | -0.328508 |
| C    | -2.527698 | -2.620109 | -1.198925 |
| C    | -4.264596 | -3.741254 | -3.112976 |
| C    | -3.764807 | -3.168880 | -0.815287 |
| C    | -2.172371 | -2.652309 | -2.558453 |
| C    | -3.036851 | -3.206585 | -3.504916 |
| C    | -4.624122 | -3.724748 | -1.764137 |
| H    | -4.070409 | -3.175019 | 0.225416  |
| H    | -1.208937 | -2.267347 | -2.874875 |
| H    | -2.740921 | -3.221864 | -4.550246 |
| H    | -5.574453 | -4.144645 | -1.445508 |
| H    | -4.935042 | -4.172942 | -3.851336 |
| C    | -0.522077 | -3.253911 | 0.854416  |
| C    | 0.780588  | -5.351846 | 2.197165  |
| C    | -0.805064 | -4.588088 | 0.532695  |
| C    | 0.428250  | -2.986733 | 1.851273  |
| C    | 1.071640  | -4.025706 | 2.522225  |
| C    | -0.155395 | -5.628175 | 1.200440  |
| H    | -1.521536 | -4.820983 | -0.247374 |



|    |           |           |           |
|----|-----------|-----------|-----------|
| H  | 0.683013  | -1.960454 | 2.096854  |
| H  | 1.807180  | -3.798391 | 3.288970  |
| H  | -0.379254 | -6.657242 | 0.932689  |
| H  | 1.286864  | -6.163560 | 2.712172  |
| C  | -0.554286 | 3.352439  | -0.801883 |
| C  | 0.425988  | 5.877611  | -1.543886 |
| C  | 0.354912  | 4.032088  | 0.020707  |
| C  | -0.956979 | 3.947091  | -2.007048 |
| C  | -0.473151 | 5.202388  | -2.371744 |
| C  | 0.839900  | 5.287917  | -0.349720 |
| H  | 0.701335  | 3.592863  | 0.949462  |
| H  | -1.645521 | 3.429286  | -2.666111 |
| H  | -0.794836 | 5.648947  | -3.308566 |
| H  | 1.542759  | 5.801894  | 0.300483  |
| H  | 0.803625  | 6.855505  | -1.830223 |
| C  | -2.936598 | 1.765052  | -0.961389 |
| C  | -5.545328 | 1.888356  | -2.000082 |
| C  | -3.866029 | 2.689440  | -0.452576 |
| C  | -3.329599 | 0.918374  | -2.007053 |
| C  | -4.627009 | 0.979100  | -2.523573 |
| C  | -5.161364 | 2.745945  | -0.964517 |
| H  | -3.578370 | 3.376877  | 0.338110  |
| H  | -2.620069 | 0.213056  | -2.428182 |
| H  | -4.912162 | 0.313060  | -3.332903 |
| H  | -5.869921 | 3.462970  | -0.558794 |
| H  | -6.554988 | 1.935486  | -2.398930 |
| H  | -3.385726 | 1.179160  | 1.819476  |
| O  | -2.410411 | 1.544840  | 3.617184  |
| O  | -2.823579 | -0.706373 | 3.656975  |
| C  | -2.877167 | 0.481917  | 4.457286  |
| C  | -1.931793 | 0.369213  | 5.650533  |
| H  | -1.914818 | 1.308460  | 6.212761  |
| H  | -2.255777 | -0.435426 | 6.317793  |
| H  | -0.916685 | 0.151969  | 5.304518  |
| C  | -4.330214 | 0.714343  | 4.865038  |
| H  | -4.705994 | -0.140224 | 5.436767  |
| H  | -4.412674 | 1.614828  | 5.481697  |
| H  | -4.954749 | 0.837105  | 3.975122  |
| Rh | -0.051279 | -0.228054 | -1.039750 |
| C  | 2.776596  | -0.025562 | 0.501645  |
| Br | 1.095278  | 1.155599  | -2.786534 |
| Cl | 1.139365  | -2.169734 | -1.851768 |
| H  | 2.306133  | -0.951789 | 0.816526  |
| C  | 2.741750  | 1.073021  | 1.412703  |

|    |          |           |           |
|----|----------|-----------|-----------|
| C  | 3.375420 | 2.320643  | 1.156594  |
| C  | 2.090182 | 0.923095  | 2.670644  |
| C  | 3.369535 | 3.334828  | 2.105482  |
| H  | 3.873139 | 2.484253  | 0.207896  |
| C  | 2.085247 | 1.942207  | 3.612566  |
| H  | 1.613566 | -0.026248 | 2.901429  |
| C  | 2.726606 | 3.158169  | 3.337514  |
| H  | 3.871873 | 4.273288  | 1.886551  |
| H  | 1.589106 | 1.793016  | 4.567816  |
| H  | 2.728623 | 3.954507  | 4.076220  |
| C  | 3.691425 | -0.140301 | -0.681255 |
| H  | 3.197087 | -0.730779 | -1.457976 |
| H  | 3.940932 | 0.828815  | -1.117492 |
| C  | 5.028011 | -0.858314 | -0.382896 |
| Cl | 5.964455 | -0.991218 | -1.921601 |
| Cl | 4.746391 | -2.516238 | 0.269741  |
| Cl | 6.035373 | 0.062204  | 0.811907  |

### 27-TS-R

|                              |                           |
|------------------------------|---------------------------|
| M06L SCF energy:             | -6903.89184458 a.u.       |
| M06L enthalpy:               | -6903.136455 a.u.         |
| M06L free energy:            | -6903.273927 a.u.         |
| M06 SCF energy in solution:  | -6906.11734918 a.u.       |
| M06 enthalpy in solution:    | -6905.361960 a.u.         |
| M06 free energy in solution: | -6905.499432 a.u.         |
| Imaginary frequency:         | -78.6781 cm <sup>-1</sup> |

### Cartesian coordinates

| ATOM | X         | Y         | Z         |
|------|-----------|-----------|-----------|
| H    | 3.368203  | -0.237980 | 1.096999  |
| C    | 2.684299  | 0.554251  | 1.435026  |
| H    | 3.292226  | 1.314814  | 1.939612  |
| C    | 1.688110  | 0.018437  | 2.447824  |
| H    | 0.700375  | 0.511586  | 2.341121  |
| C    | 1.490472  | -1.490165 | 2.467195  |
| C    | 0.494826  | -2.108446 | 1.510317  |
| H    | -0.508146 | -1.750062 | 1.782889  |
| H    | 0.485246  | -3.195463 | 1.671364  |
| P    | 1.871114  | 1.340707  | -0.029351 |
| P    | 0.730130  | -1.762454 | -0.297017 |
| C    | 3.320437  | 1.730621  | -1.084056 |
| C    | 5.508161  | 2.202688  | -2.775301 |
| C    | 4.623791  | 1.778135  | -0.571434 |
| C    | 3.128406  | 1.926274  | -2.459059 |

|   |           |           |           |
|---|-----------|-----------|-----------|
| C | 4.215553  | 2.162601  | -3.294721 |
| C | 5.709387  | 2.012331  | -1.411355 |
| H | 4.806513  | 1.629388  | 0.491187  |
| H | 2.116249  | 1.892577  | -2.863679 |
| H | 4.049386  | 2.313472  | -4.359989 |
| H | 6.715252  | 2.043096  | -0.995364 |
| H | 6.357273  | 2.382602  | -3.432889 |
| C | 1.378266  | 2.934835  | 0.731159  |
| C | 0.592180  | 5.288543  | 2.028066  |
| C | 2.235866  | 4.036226  | 0.776990  |
| C | 0.121944  | 3.028918  | 1.339185  |
| C | -0.268028 | 4.192863  | 1.990418  |
| C | 1.840790  | 5.208034  | 1.418358  |
| H | 3.212796  | 3.986138  | 0.296507  |
| H | -0.561767 | 2.179664  | 1.282132  |
| H | -1.251044 | 4.247696  | 2.456699  |
| H | 2.512614  | 6.064689  | 1.435445  |
| H | 0.286364  | 6.206412  | 2.527415  |
| C | -0.169532 | -3.183599 | -1.025810 |
| C | -1.611344 | -5.217010 | -2.302101 |
| C | -1.230807 | -3.817698 | -0.373236 |
| C | 0.160853  | -3.582009 | -2.326504 |
| C | -0.549514 | -4.594329 | -2.957076 |
| C | -1.950685 | -4.826179 | -1.011461 |
| H | -1.510195 | -3.529847 | 0.639957  |
| H | 0.973512  | -3.081492 | -2.853608 |
| H | -0.280502 | -4.892952 | -3.968642 |
| H | -2.776646 | -5.308375 | -0.490621 |
| H | -2.172088 | -6.006436 | -2.799314 |
| C | 2.474436  | -2.245716 | -0.603155 |
| C | 5.146859  | -2.888217 | -1.141300 |
| C | 3.111011  | -3.277498 | 0.098483  |
| C | 3.185868  | -1.565034 | -1.596962 |
| C | 4.515981  | -1.879797 | -1.863361 |
| C | 4.440302  | -3.591965 | -0.165903 |
| H | 2.565055  | -3.840581 | 0.856160  |
| H | 2.687227  | -0.771493 | -2.155672 |
| H | 5.055306  | -1.326450 | -2.630597 |
| H | 4.927846  | -4.389946 | 0.391503  |
| H | 6.188934  | -3.133045 | -1.339507 |
| H | 2.484419  | -1.962067 | 2.335400  |
| O | 1.015353  | -1.710613 | 3.786791  |
| O | 2.212202  | 0.237760  | 3.750399  |
| C | 1.576134  | -0.691579 | 4.626778  |

|    |           |           |           |
|----|-----------|-----------|-----------|
| C  | 0.442640  | -0.025812 | 5.381971  |
| H  | -0.146648 | -0.770649 | 5.927499  |
| H  | 0.834825  | 0.706066  | 6.096297  |
| H  | -0.222794 | 0.494137  | 4.684326  |
| C  | 2.637411  | -1.278677 | 5.532861  |
| H  | 3.129291  | -0.488211 | 6.109862  |
| H  | 2.190802  | -1.994258 | 6.231060  |
| H  | 3.395724  | -1.794985 | 4.935809  |
| Rh | 0.203116  | 0.273324  | -1.111236 |
| C  | -2.754800 | 0.612038  | -0.309842 |
| Br | -1.680618 | -0.614214 | -2.581274 |
| Cl | -0.273589 | 2.469795  | -2.063983 |
| H  | -1.882222 | 1.139494  | 0.078158  |
| C  | -3.716857 | 1.405738  | -0.983233 |
| C  | -3.457884 | 2.788940  | -1.144336 |
| C  | -4.940474 | 0.882037  | -1.465488 |
| C  | -4.393530 | 3.610456  | -1.750823 |
| H  | -2.503351 | 3.185267  | -0.803536 |
| C  | -5.868614 | 1.711307  | -2.062725 |
| H  | -5.142623 | -0.184035 | -1.377932 |
| C  | -5.597575 | 3.077331  | -2.209613 |
| H  | -4.182661 | 4.670416  | -1.873991 |
| H  | -6.806867 | 1.301351  | -2.430234 |
| H  | -6.329988 | 3.724162  | -2.689641 |
| C  | -2.999900 | -0.732640 | 0.287383  |
| H  | -3.746251 | -1.322228 | -0.256538 |
| H  | -2.069915 | -1.311183 | 0.262835  |
| C  | -3.437536 | -0.674971 | 1.753716  |
| Cl | -2.261949 | 0.286728  | 2.719690  |
| Cl | -3.465894 | -2.350859 | 2.402662  |
| Cl | -5.060971 | 0.044810  | 1.928601  |

### 27-TS-S

|                              |                            |
|------------------------------|----------------------------|
| M06L SCF energy:             | -6903.89237038 a.u.        |
| M06L enthalpy:               | -6903.137082 a.u.          |
| M06L free energy:            | -6903.273230 a.u.          |
| M06 SCF energy in solution:  | -6906.11712504 a.u.        |
| M06 enthalpy in solution:    | -6905.361837 a.u.          |
| M06 free energy in solution: | -6905.497985 a.u.          |
| Imaginary frequency:         | -128.2307 cm <sup>-1</sup> |

### Cartesian coordinates

| ATOM | X         | Y         | Z         |
|------|-----------|-----------|-----------|
| H    | -3.533385 | -0.682094 | -0.202453 |

|   |           |           |           |
|---|-----------|-----------|-----------|
| C | -2.934975 | -1.308505 | 0.473626  |
| H | -3.510133 | -2.232579 | 0.612895  |
| C | -2.740119 | -0.638281 | 1.822320  |
| H | -1.716223 | -0.819226 | 2.209789  |
| C | -3.012399 | 0.848776  | 1.914692  |
| C | -1.872102 | 1.756970  | 1.522656  |
| H | -1.004135 | 1.533590  | 2.156710  |
| H | -2.151431 | 2.796803  | 1.736442  |
| P | -1.348316 | -1.705974 | -0.384891 |
| P | -1.303646 | 1.666486  | -0.248569 |
| C | -1.983254 | -2.823395 | -1.691073 |
| C | -3.065305 | -4.464916 | -3.677695 |
| C | -2.601066 | -4.032490 | -1.351799 |
| C | -1.905617 | -2.448749 | -3.035316 |
| C | -2.450328 | -3.264649 | -4.022834 |
| C | -3.136962 | -4.850495 | -2.340500 |
| H | -2.647040 | -4.345037 | -0.307183 |
| H | -1.376323 | -1.534042 | -3.302569 |
| H | -2.375604 | -2.968811 | -5.067691 |
| H | -3.607079 | -5.793779 | -2.067014 |
| H | -3.481236 | -5.107951 | -4.451694 |
| C | -0.562262 | -2.830619 | 0.851387  |
| C | 0.715558  | -4.479837 | 2.738700  |
| C | 0.796417  | -3.152397 | 0.720618  |
| C | -1.270600 | -3.360779 | 1.942441  |
| C | -0.634361 | -4.173015 | 2.877539  |
| C | 1.424756  | -3.972195 | 1.653805  |
| H | 1.352097  | -2.774691 | -0.138205 |
| H | -2.323292 | -3.131065 | 2.097402  |
| H | -1.203102 | -4.562335 | 3.720922  |
| H | 2.479676  | -4.212555 | 1.531856  |
| H | 1.212737  | -5.111966 | 3.472644  |
| C | -0.574272 | 3.343080  | -0.366839 |
| C | 0.687532  | 5.829221  | -0.609516 |
| C | 0.276715  | 3.806487  | 0.641324  |
| C | -0.777651 | 4.132408  | -1.502152 |
| C | -0.152485 | 5.369389  | -1.620529 |
| C | 0.901559  | 5.044322  | 0.520381  |
| H | 0.467899  | 3.193739  | 1.523520  |
| H | -1.423477 | 3.773754  | -2.303360 |
| H | -0.320814 | 5.974898  | -2.509458 |
| H | 1.560075  | 5.394162  | 1.314511  |
| H | 1.177222  | 6.796826  | -0.704104 |
| C | -2.888260 | 1.892381  | -1.150936 |

|    |           |           |           |
|----|-----------|-----------|-----------|
| C  | -5.298859 | 2.227970  | -2.536868 |
| C  | -3.819340 | 2.855505  | -0.738569 |
| C  | -3.175757 | 1.113336  | -2.275545 |
| C  | -4.375854 | 1.278312  | -2.964866 |
| C  | -5.016725 | 3.020259  | -1.424270 |
| H  | -3.600816 | 3.488806  | 0.121973  |
| H  | -2.442713 | 0.372481  | -2.603184 |
| H  | -4.587008 | 0.661440  | -3.836566 |
| H  | -5.733313 | 3.768785  | -1.090539 |
| H  | -6.238610 | 2.355769  | -3.071457 |
| H  | -3.920835 | 1.089381  | 1.330811  |
| O  | -3.268238 | 1.019133  | 3.304928  |
| O  | -3.692236 | -1.156093 | 2.742459  |
| C  | -3.720006 | -0.238789 | 3.834032  |
| C  | -2.751882 | -0.673710 | 4.919485  |
| H  | -2.675145 | 0.094120  | 5.696830  |
| H  | -3.086862 | -1.608997 | 5.381628  |
| H  | -1.753266 | -0.835557 | 4.497130  |
| C  | -5.149146 | -0.119737 | 4.312013  |
| H  | -5.521340 | -1.088499 | 4.662123  |
| H  | -5.215346 | 0.597733  | 5.136366  |
| H  | -5.787986 | 0.225080  | 3.493251  |
| Rh | -0.037188 | -0.015285 | -1.089212 |
| C  | 2.730639  | 0.199423  | 0.037942  |
| Br | 1.733529  | 1.646754  | -1.905152 |
| Cl | 1.261965  | -1.676003 | -2.342089 |
| H  | 2.138768  | -0.715117 | -0.028974 |
| C  | 2.505020  | 0.982153  | 1.220334  |
| C  | 3.260591  | 2.124223  | 1.550186  |
| C  | 1.523181  | 0.534393  | 2.130375  |
| C  | 3.061836  | 2.771196  | 2.760831  |
| H  | 4.003544  | 2.496639  | 0.846594  |
| C  | 1.339658  | 1.173830  | 3.345519  |
| H  | 0.913847  | -0.331089 | 1.852611  |
| C  | 2.106754  | 2.298960  | 3.662952  |
| H  | 3.653128  | 3.651041  | 3.006899  |
| H  | 0.590131  | 0.807015  | 4.045700  |
| H  | 1.953740  | 2.811040  | 4.611163  |
| C  | 4.016445  | 0.121997  | -0.723365 |
| H  | 3.797249  | -0.276013 | -1.721484 |
| H  | 4.505727  | 1.094854  | -0.844710 |
| C  | 5.048166  | -0.833966 | -0.108656 |
| Cl | 6.457311  | -0.905076 | -1.211907 |
| Cl | 4.356141  | -2.472775 | 0.065245  |

Cl 5.615312 -0.267061 1.496842

**TS-A**

M06L SCF energy: -5718.33400775 a.u.  
M06L enthalpy: -5718.159813 a.u.  
M06L free energy: -5718.233040 a.u.  
M06 SCF energy in solution: -5720.77397892 a.u.  
M06 enthalpy in solution: -5720.599784 a.u.  
M06 free energy in solution: -5720.673011 a.u.  
Imaginary frequency: -381.6541 cm<sup>-1</sup>

Cartesian coordinates

| ATOM | X         | Y         | Z         |
|------|-----------|-----------|-----------|
| C    | -1.701536 | 3.836166  | 1.001487  |
| C    | -1.387635 | 2.508755  | 1.249637  |
| C    | -1.282628 | 1.582722  | 0.194864  |
| C    | -1.473823 | 2.042355  | -1.122732 |
| C    | -1.784222 | 3.369772  | -1.367334 |
| C    | -1.903607 | 4.271695  | -0.307976 |
| H    | -1.791172 | 4.536226  | 1.829673  |
| H    | -1.225586 | 2.164235  | 2.270744  |
| H    | -1.369519 | 1.351754  | -1.958270 |
| H    | -1.932541 | 3.709785  | -2.390364 |
| H    | -2.148094 | 5.313576  | -0.505379 |
| C    | -0.950840 | 0.203074  | 0.500461  |
| C    | -1.413751 | -0.941368 | -0.358350 |
| H    | -0.945220 | -0.032475 | 1.565893  |
| H    | -1.373688 | -0.693212 | -1.424907 |
| H    | -0.758866 | -1.807168 | -0.209169 |
| C    | -2.833863 | -1.426475 | -0.056219 |
| Cl   | -4.047244 | -0.145302 | -0.335937 |
| Cl   | -2.946011 | -1.972971 | 1.649496  |
| Cl   | -3.197192 | -2.814747 | -1.132051 |
| C    | 3.572365  | -0.388226 | -0.076509 |
| Cl   | 4.210994  | -0.612296 | 1.535013  |
| Cl   | 4.265982  | 0.994361  | -0.894073 |
| Cl   | 3.627660  | -1.847023 | -1.039923 |
| Br   | 1.313163  | 0.110631  | 0.187854  |

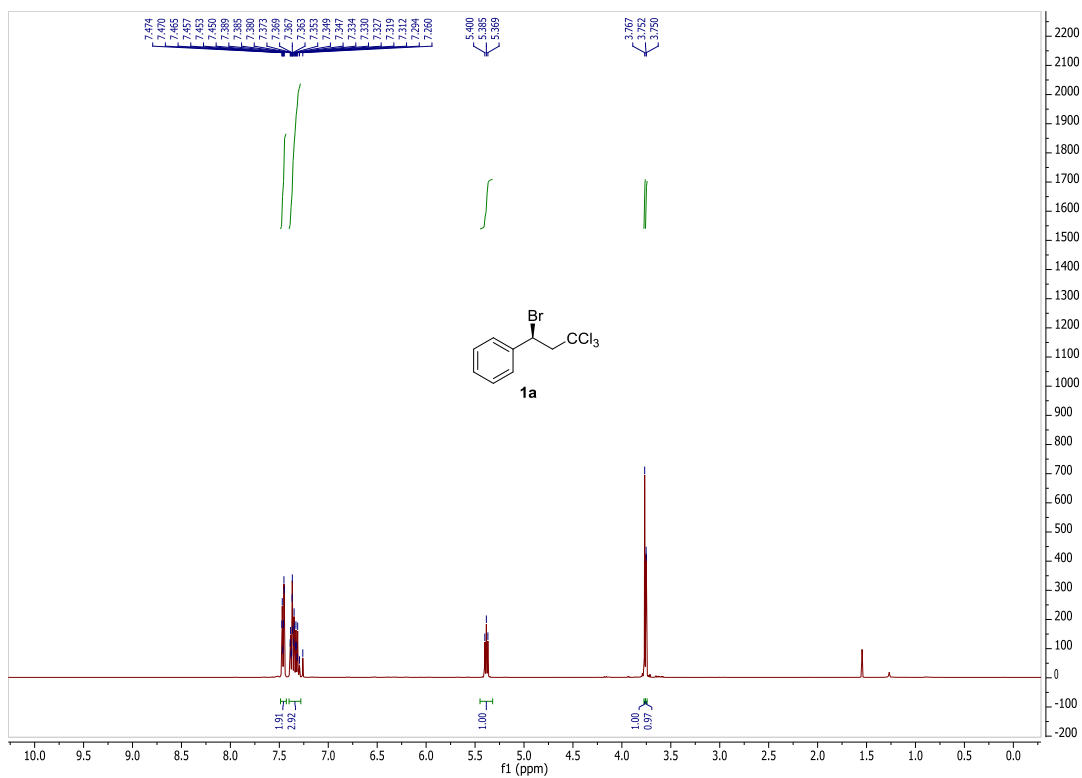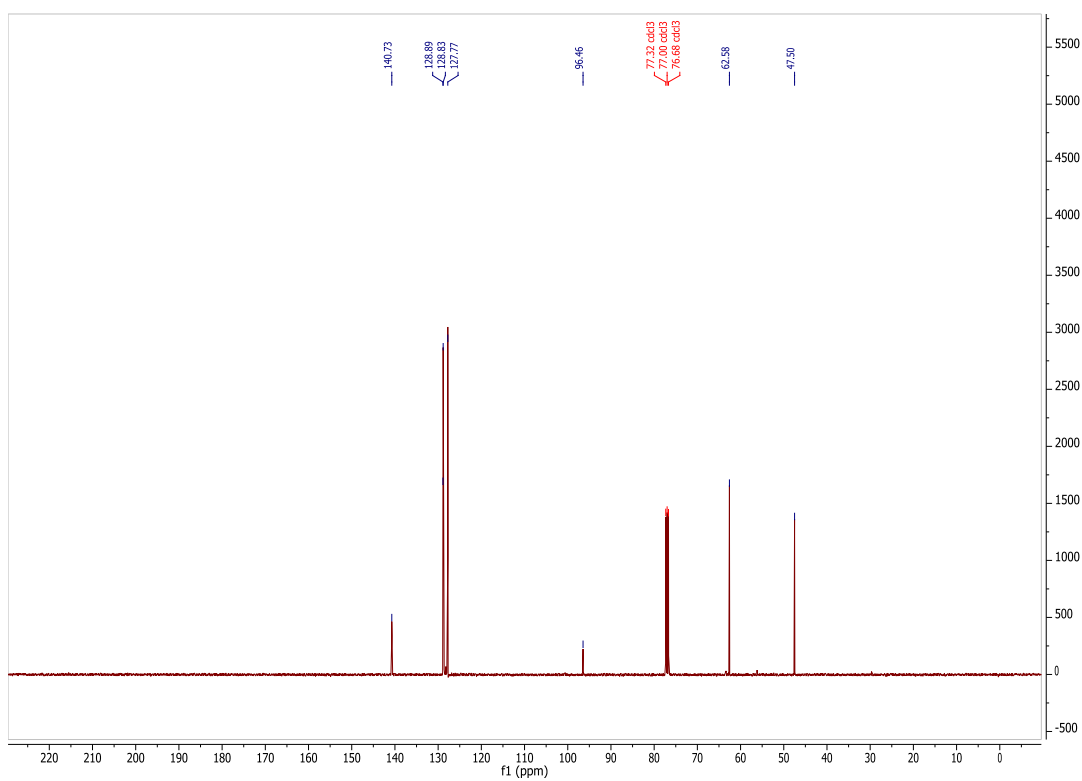



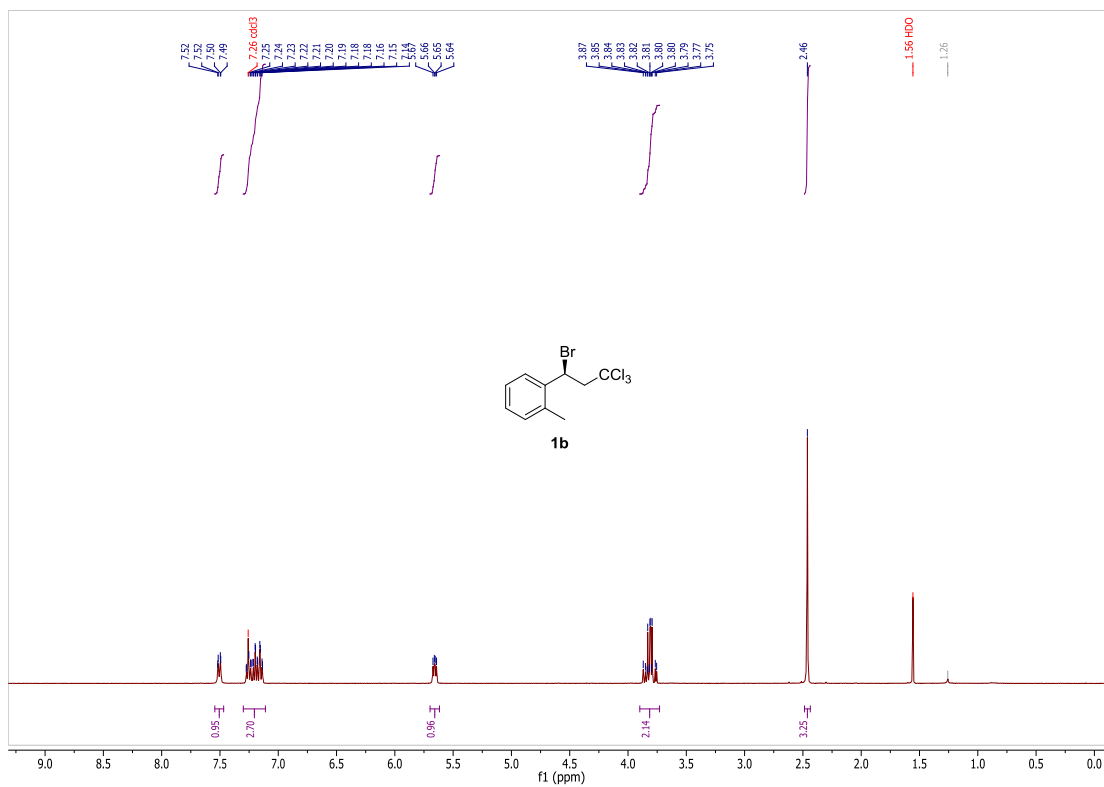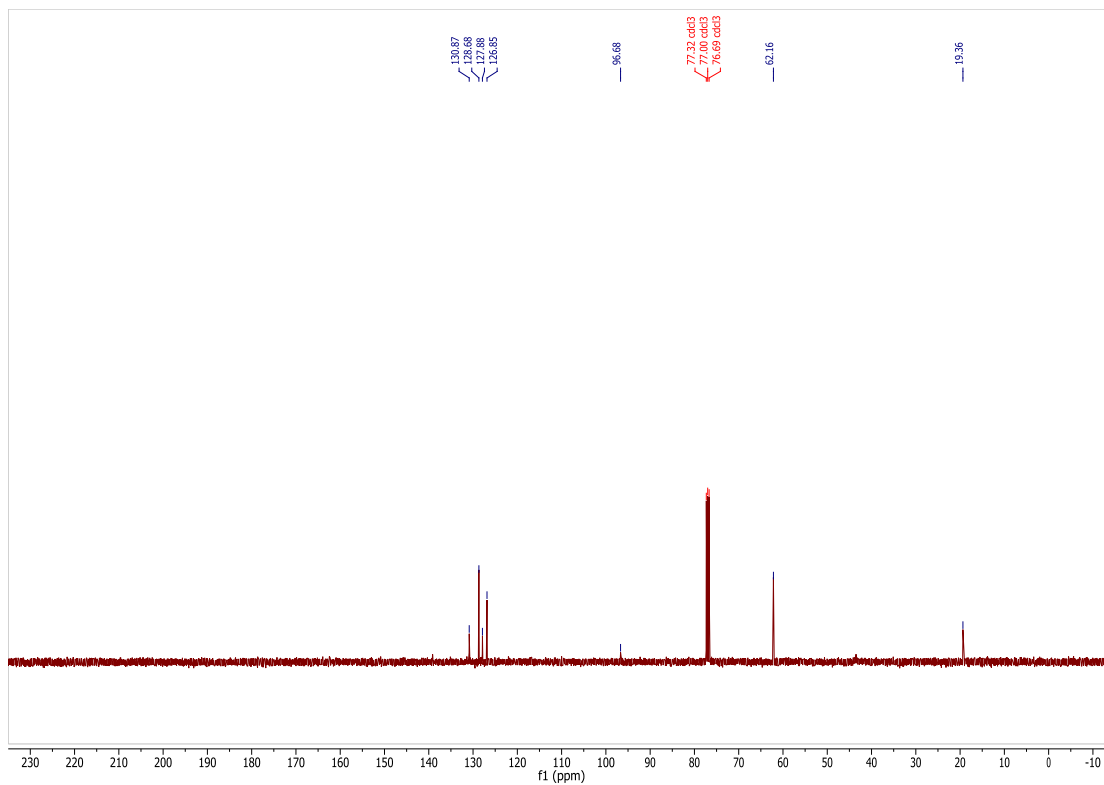

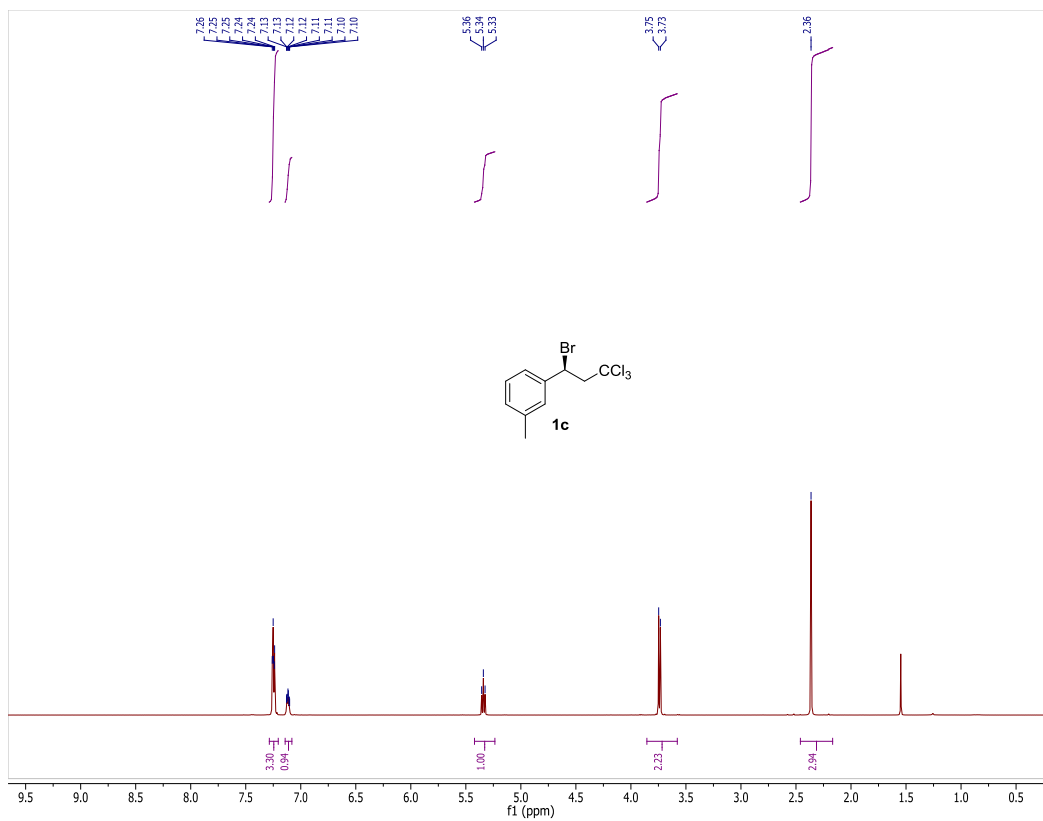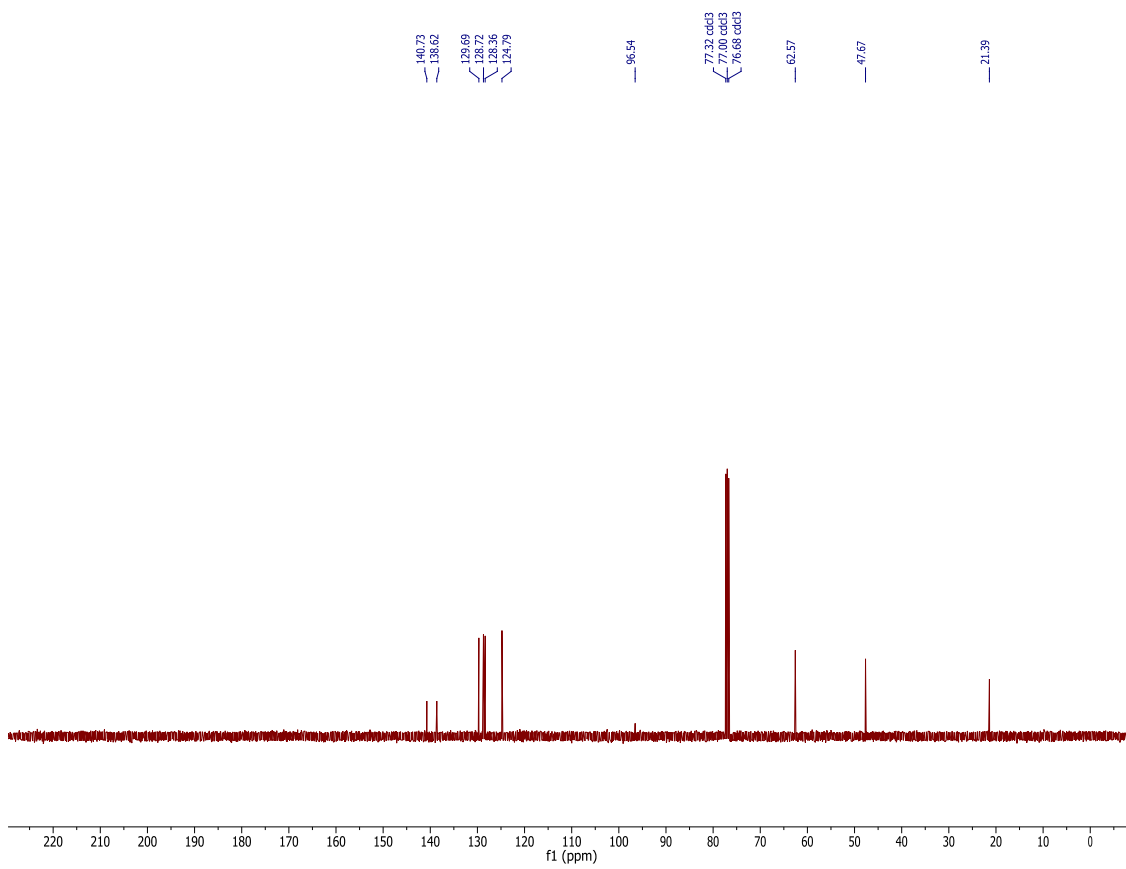

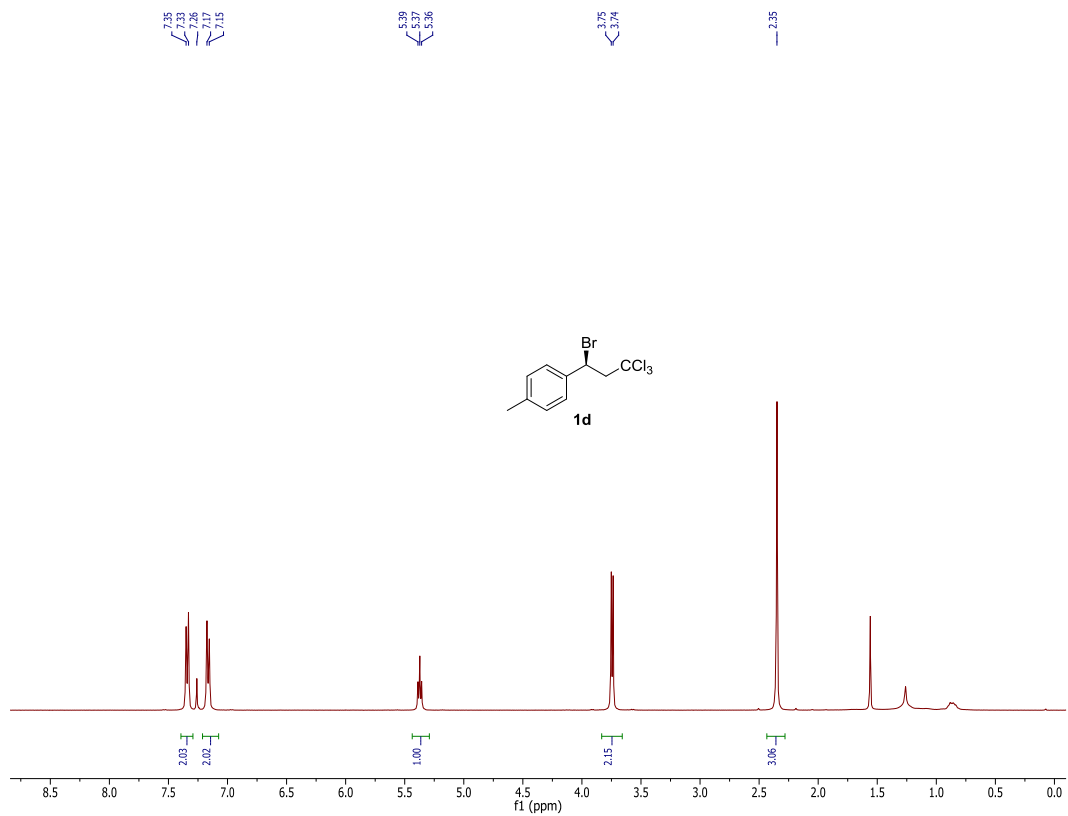

cb-4-154

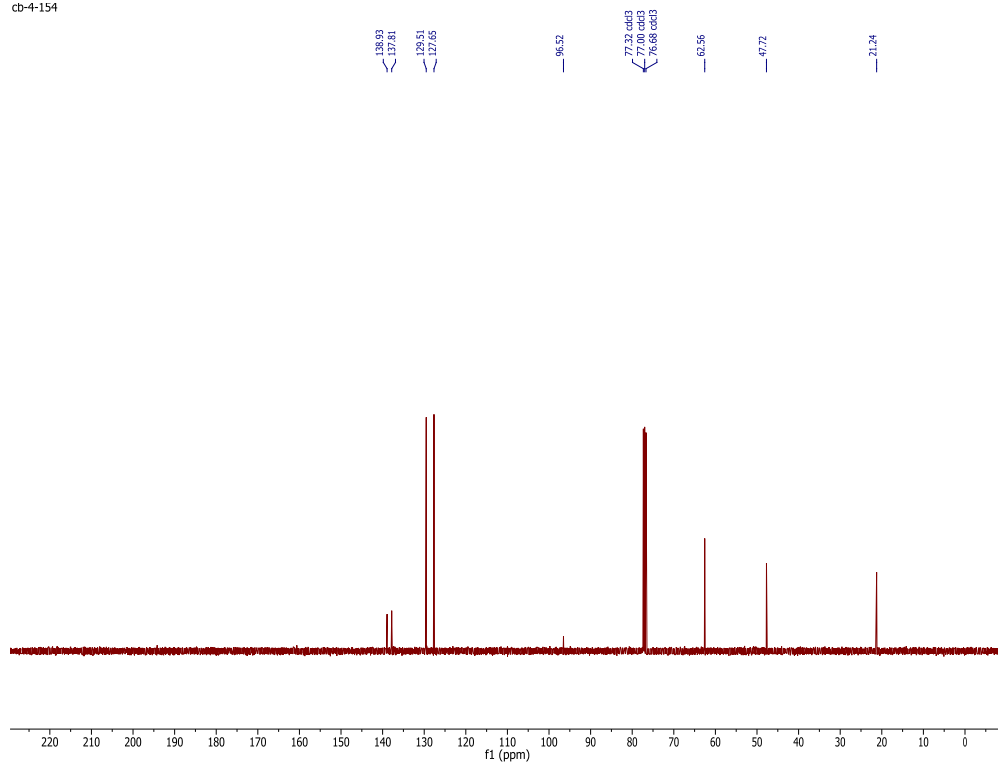

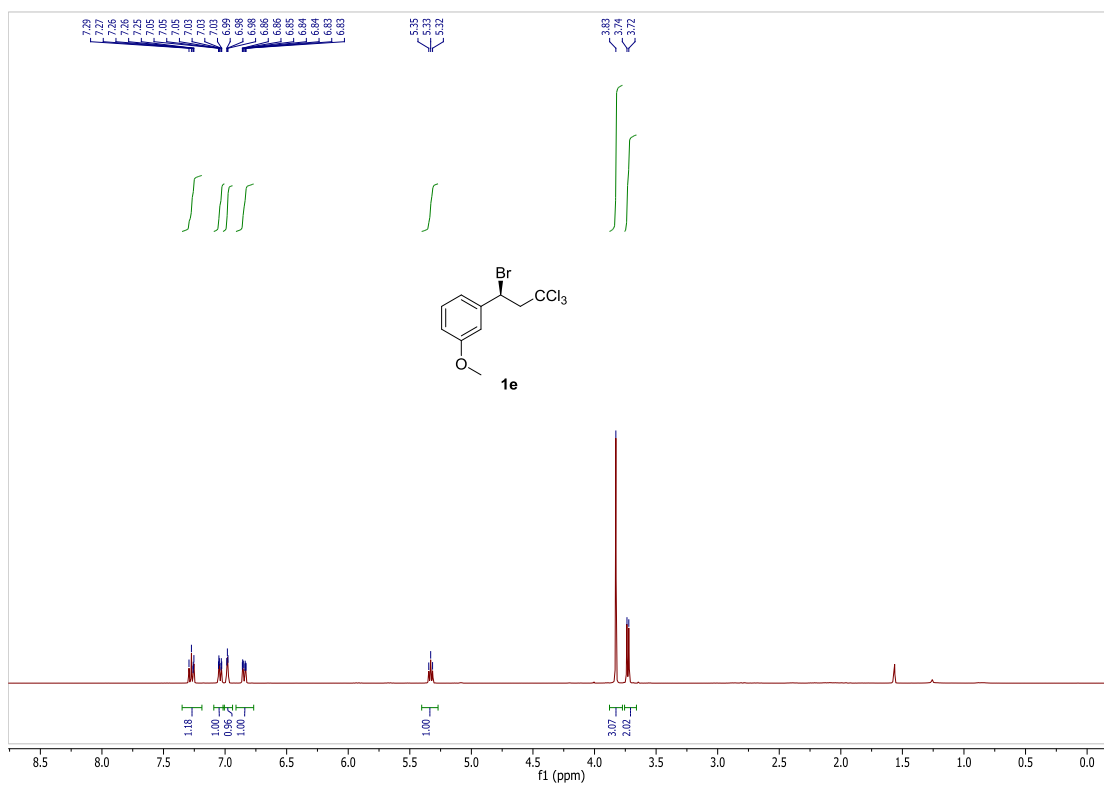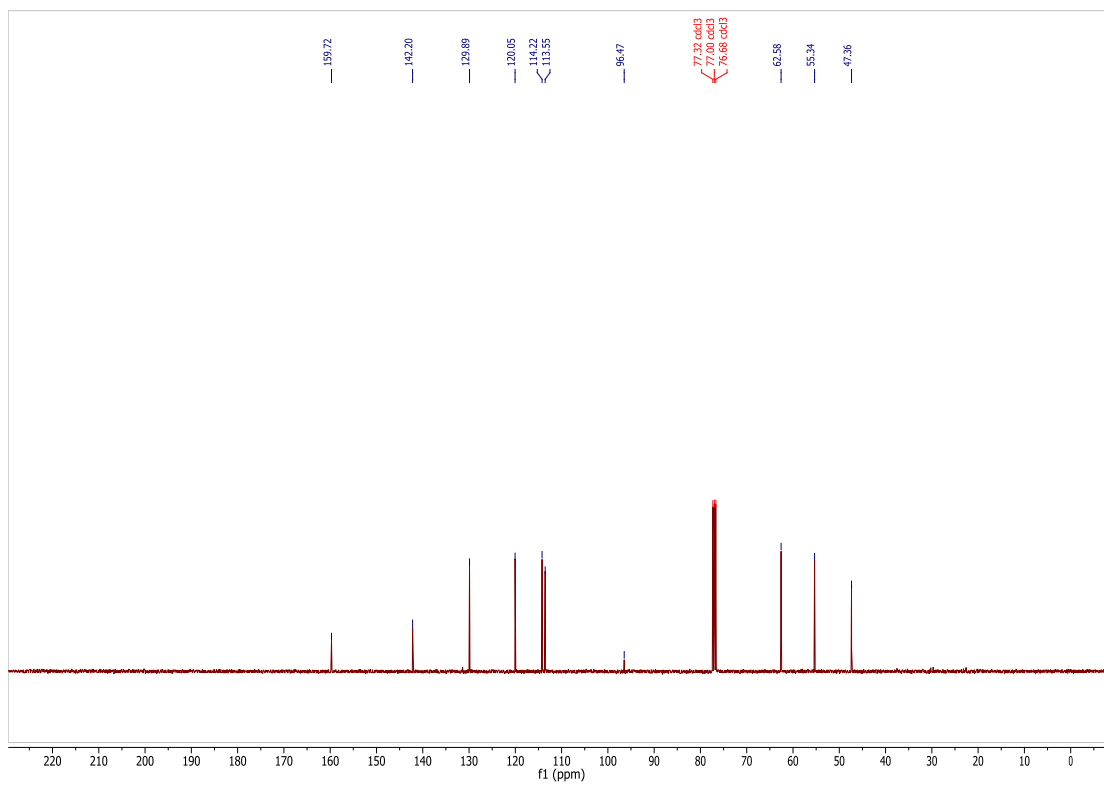

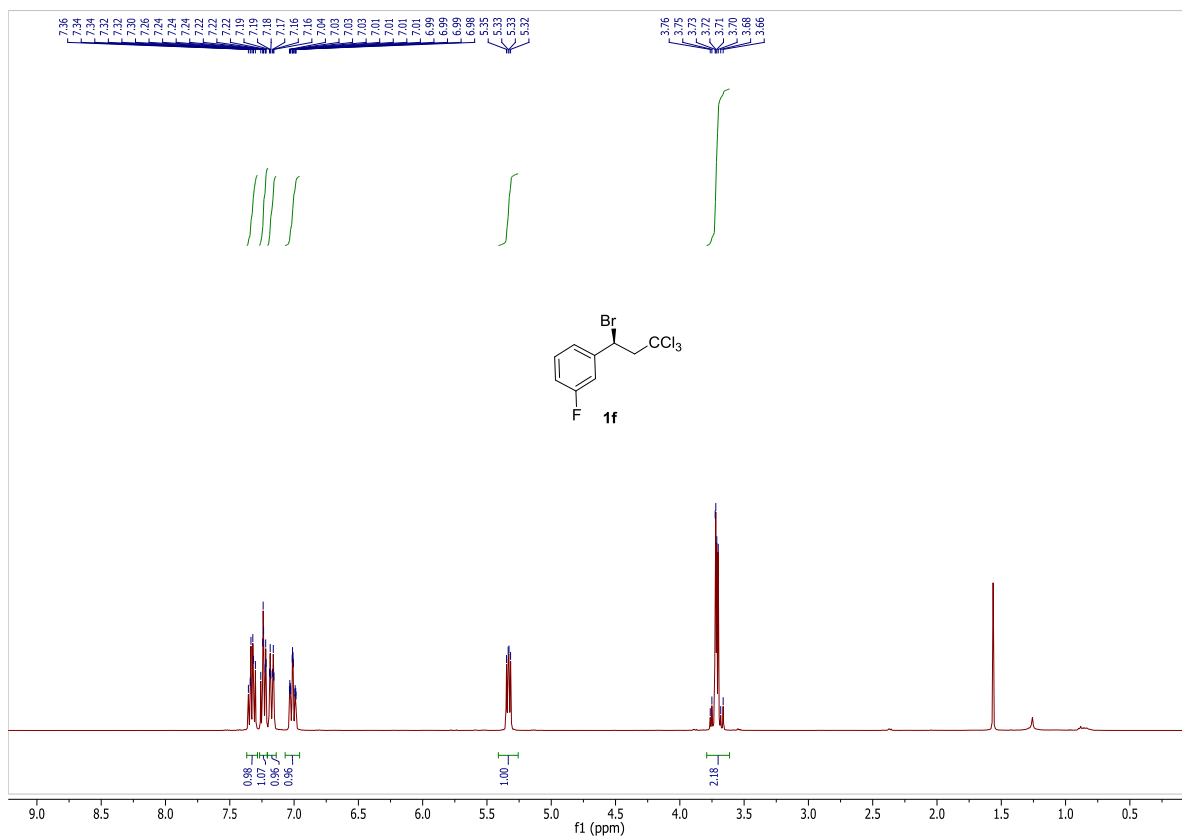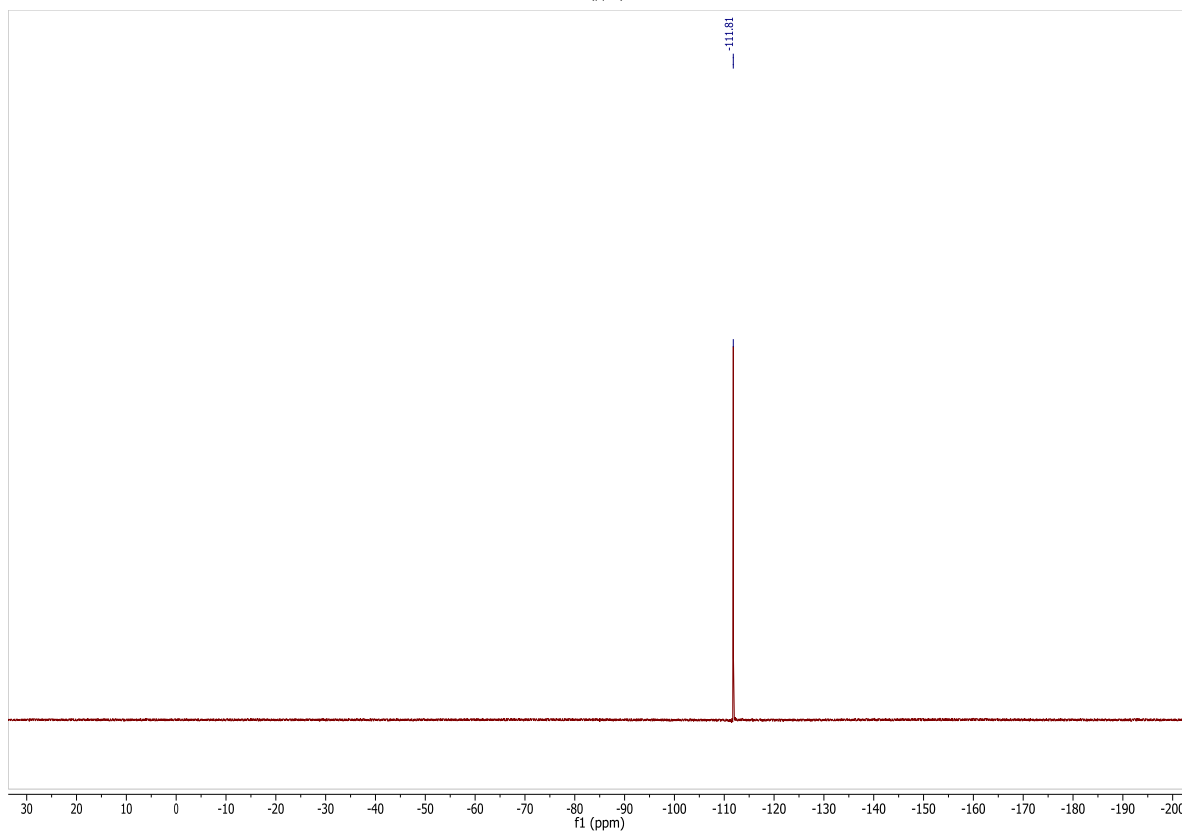

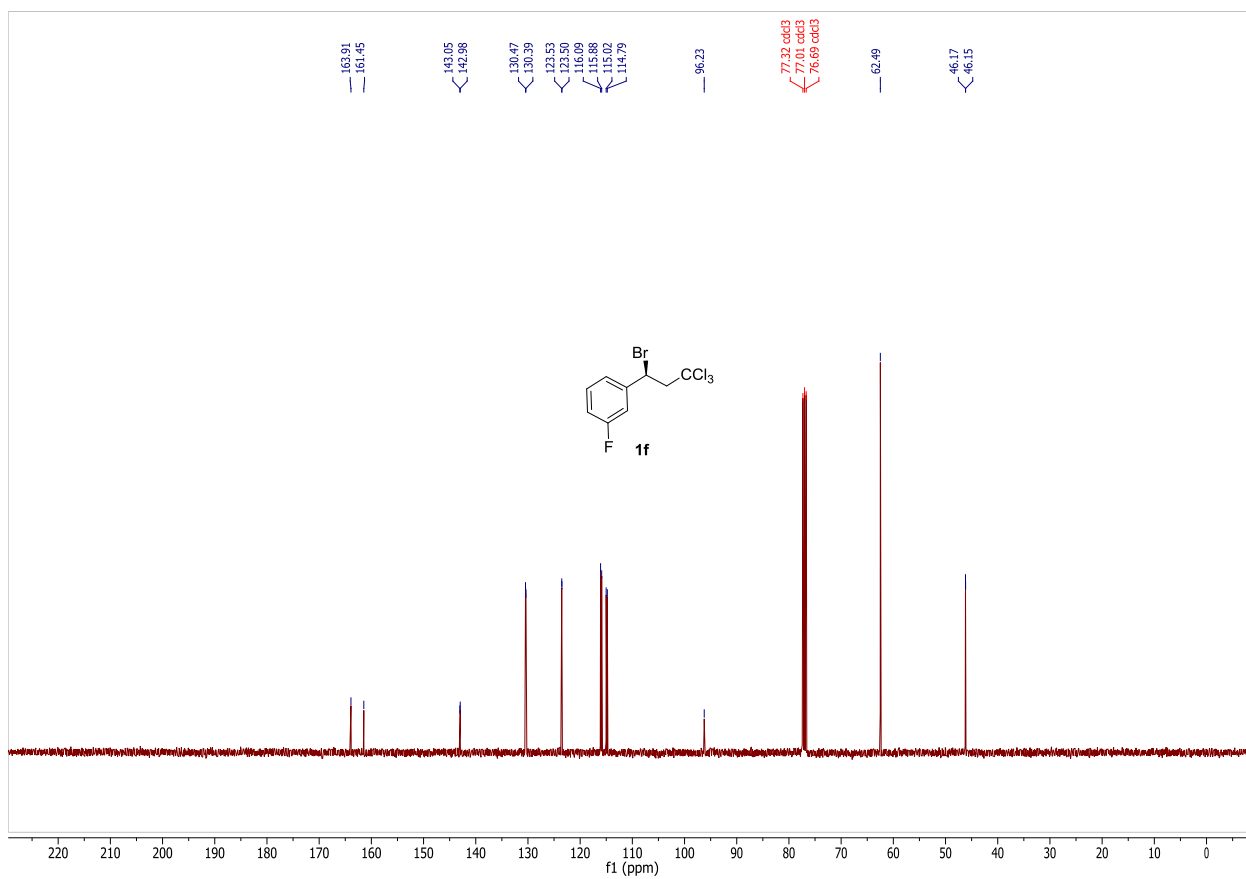

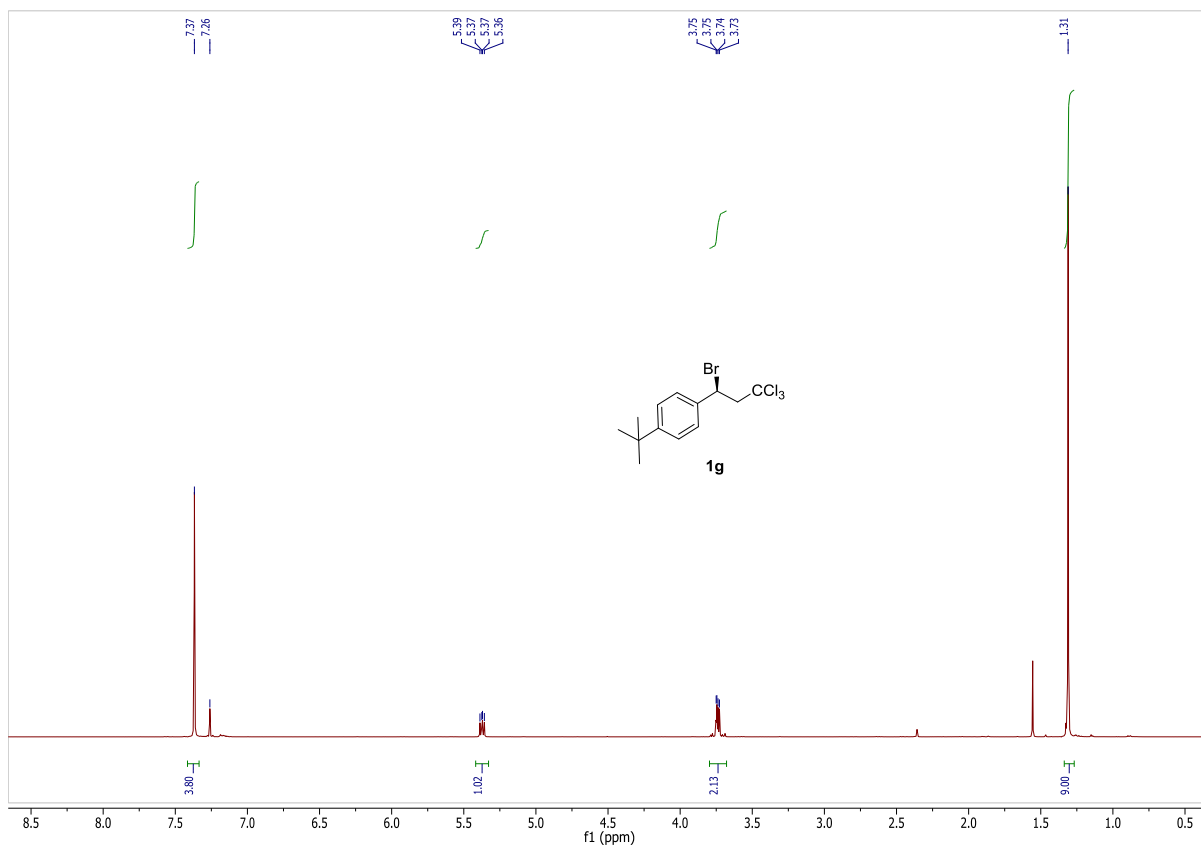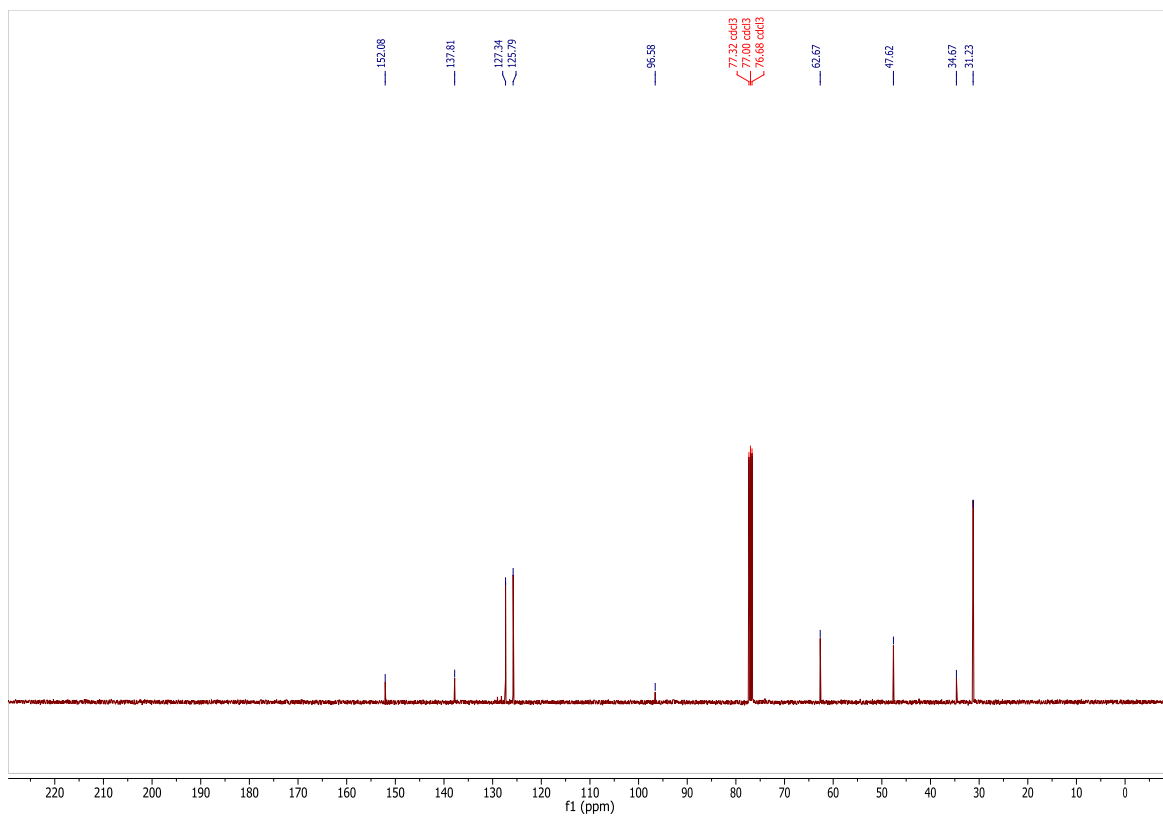

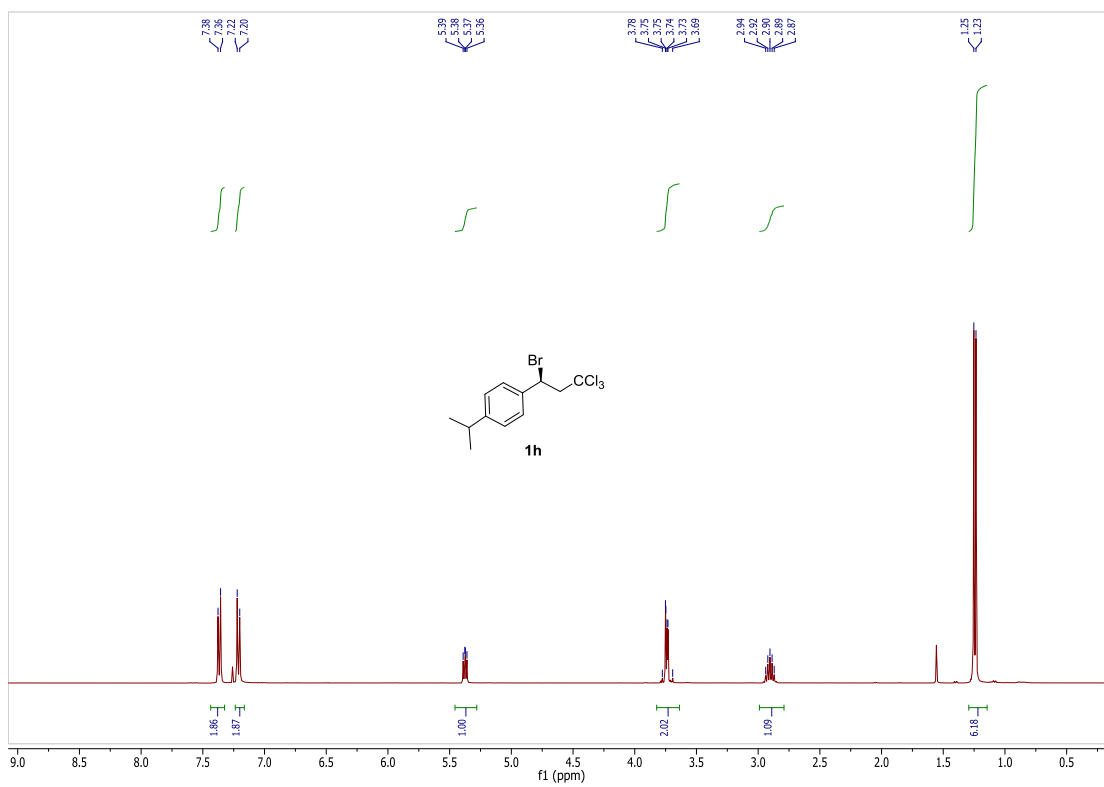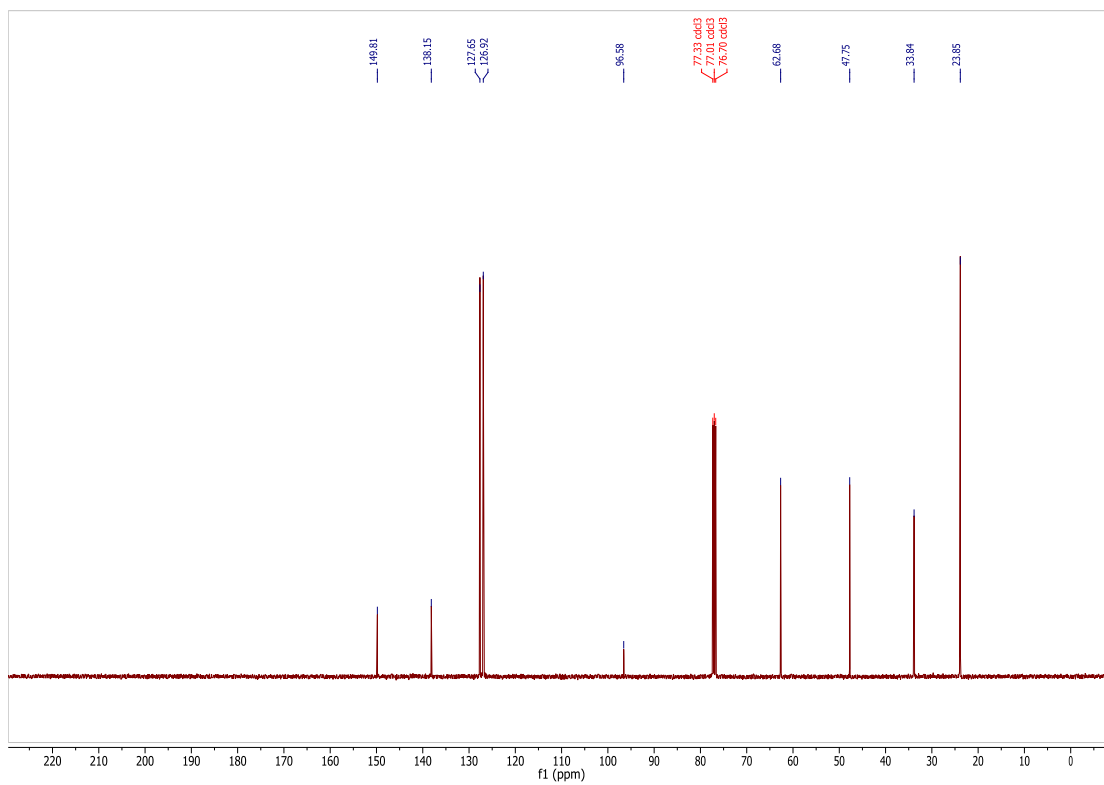



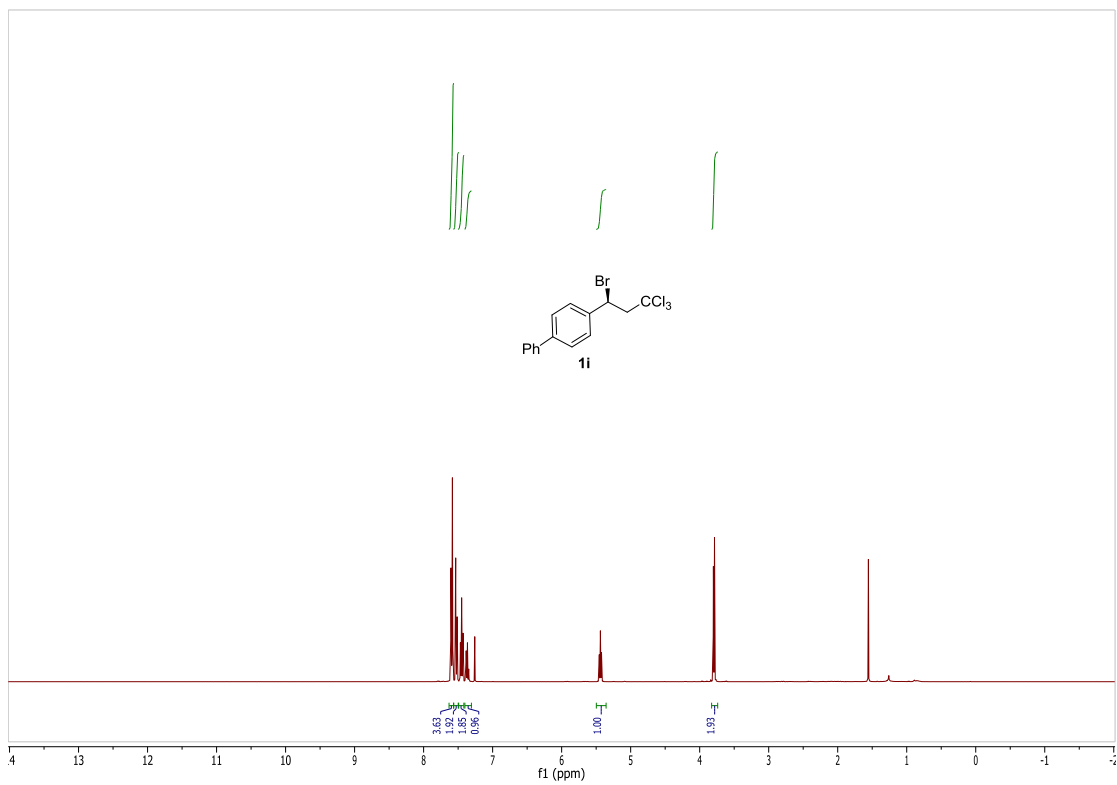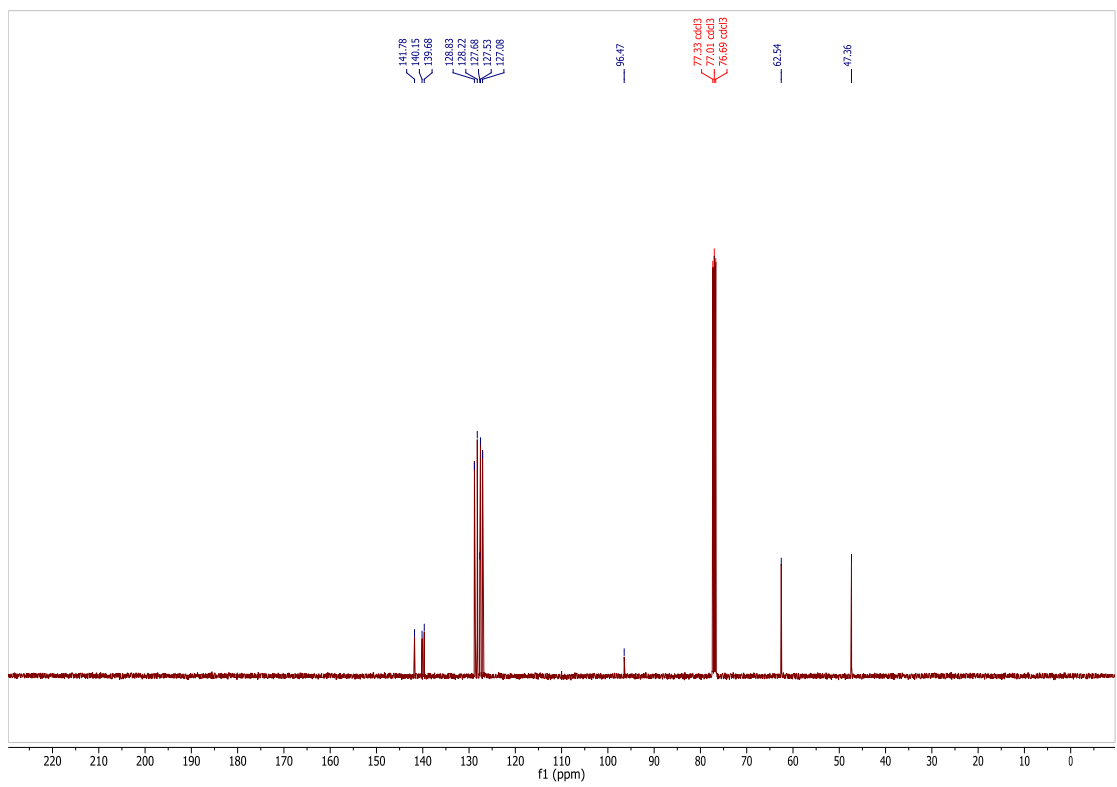

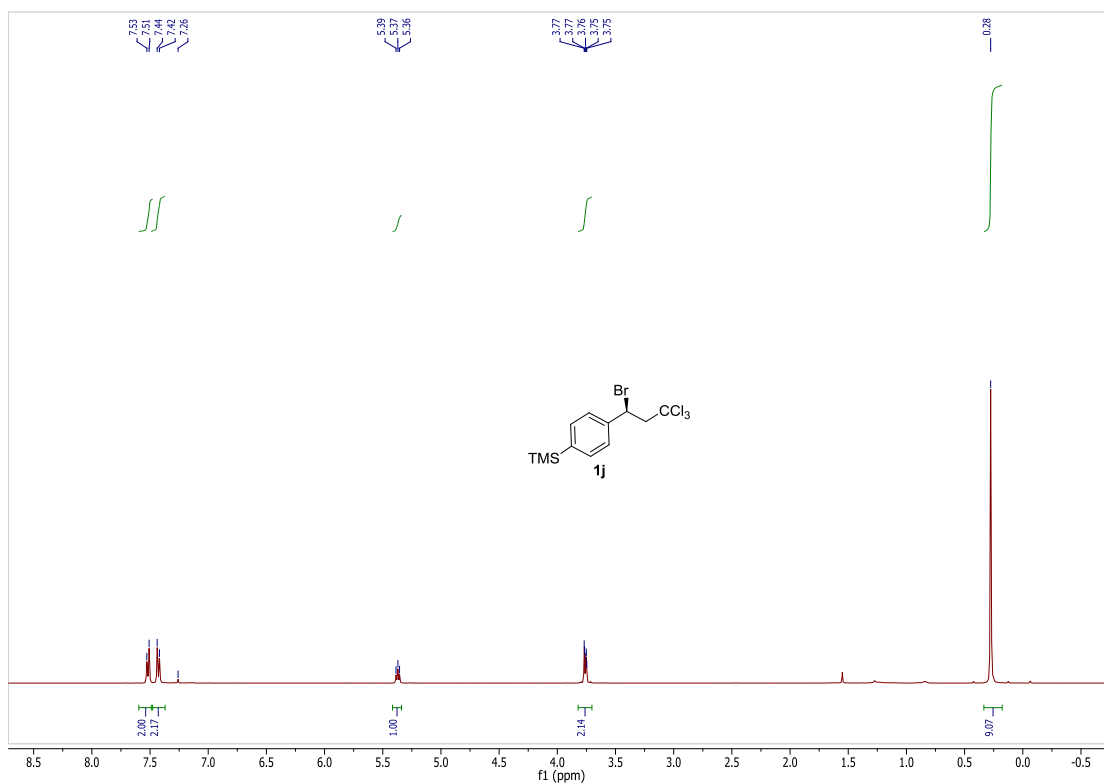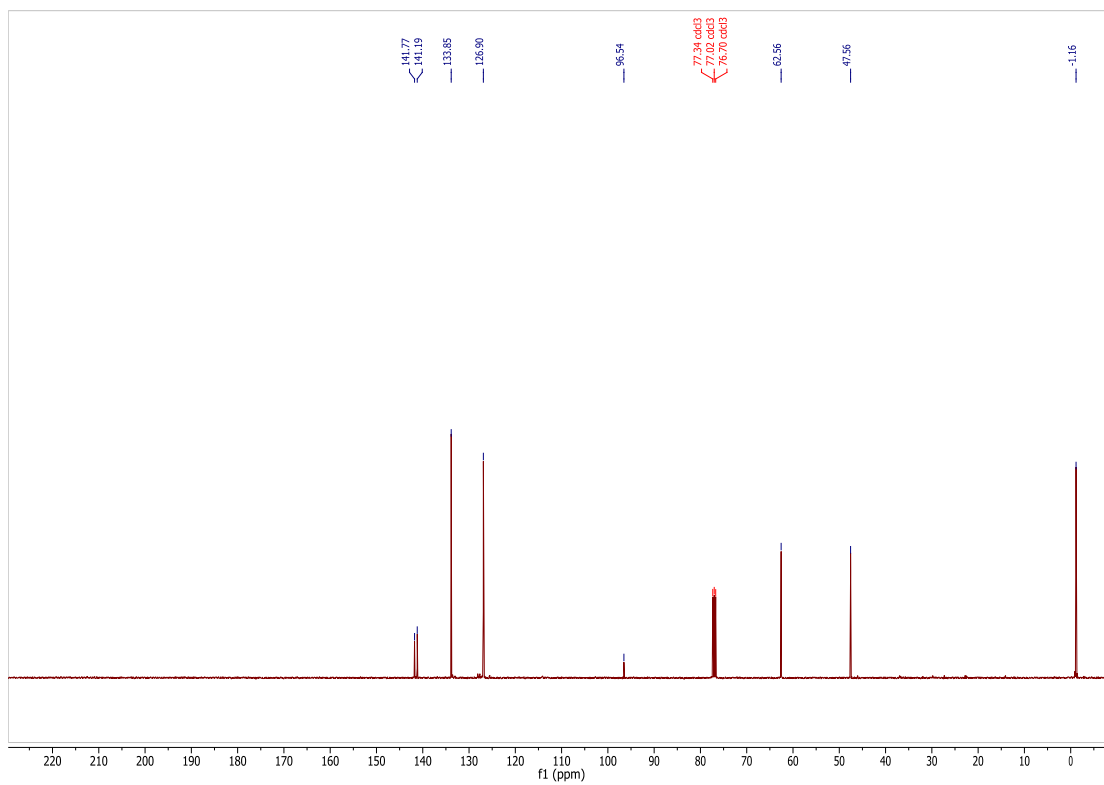

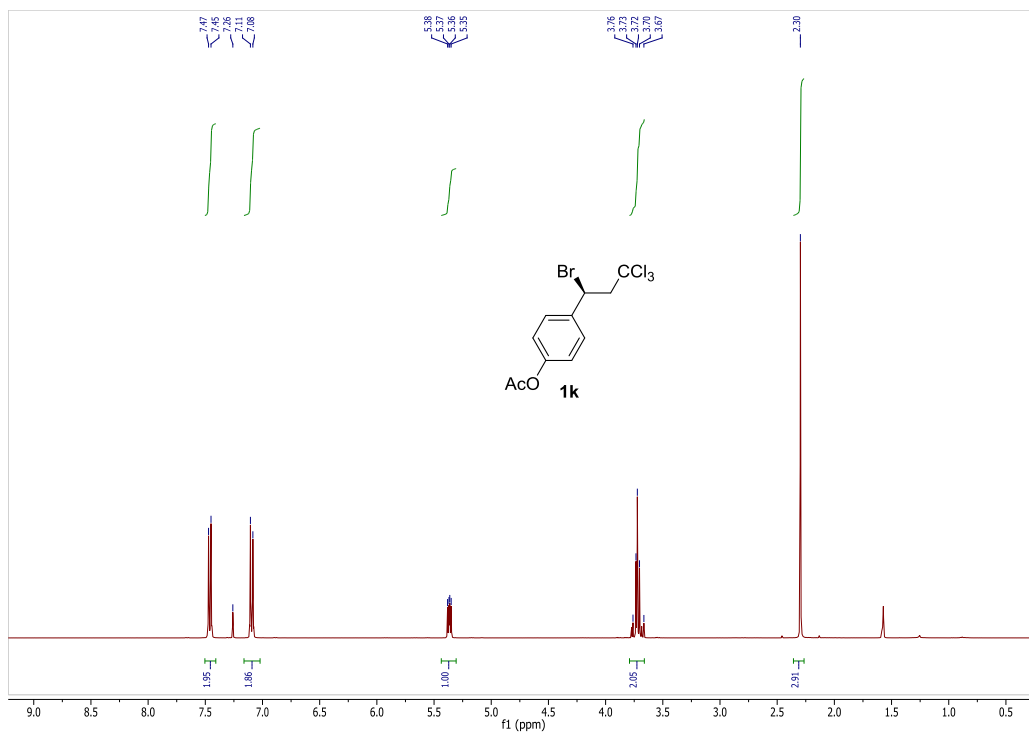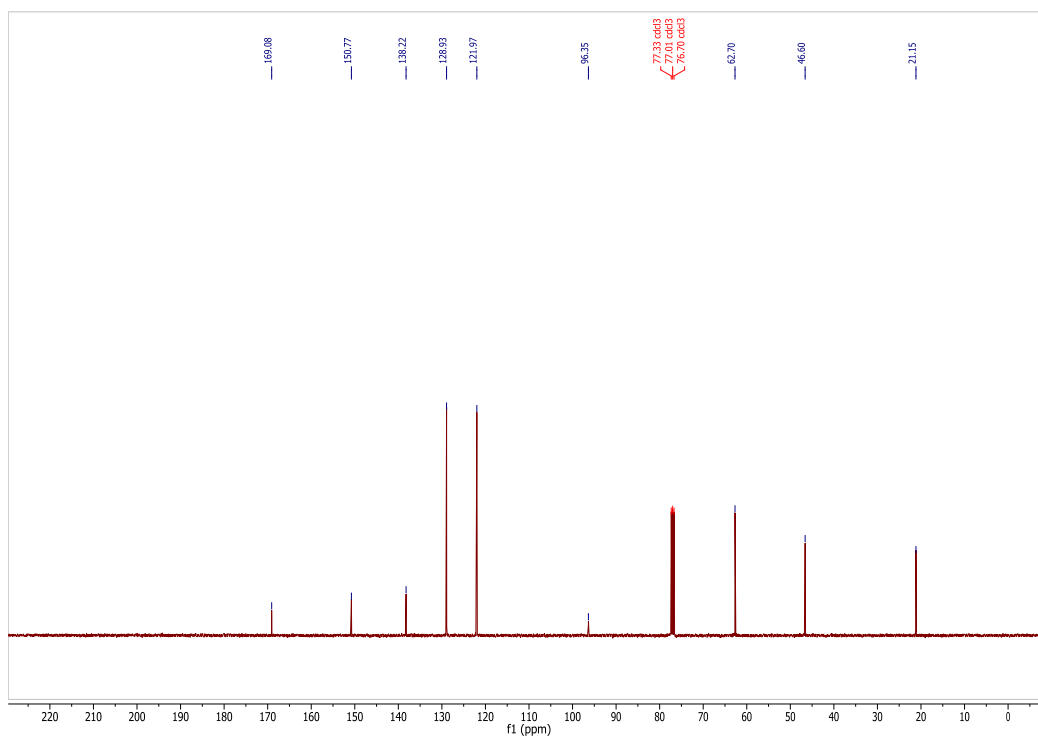

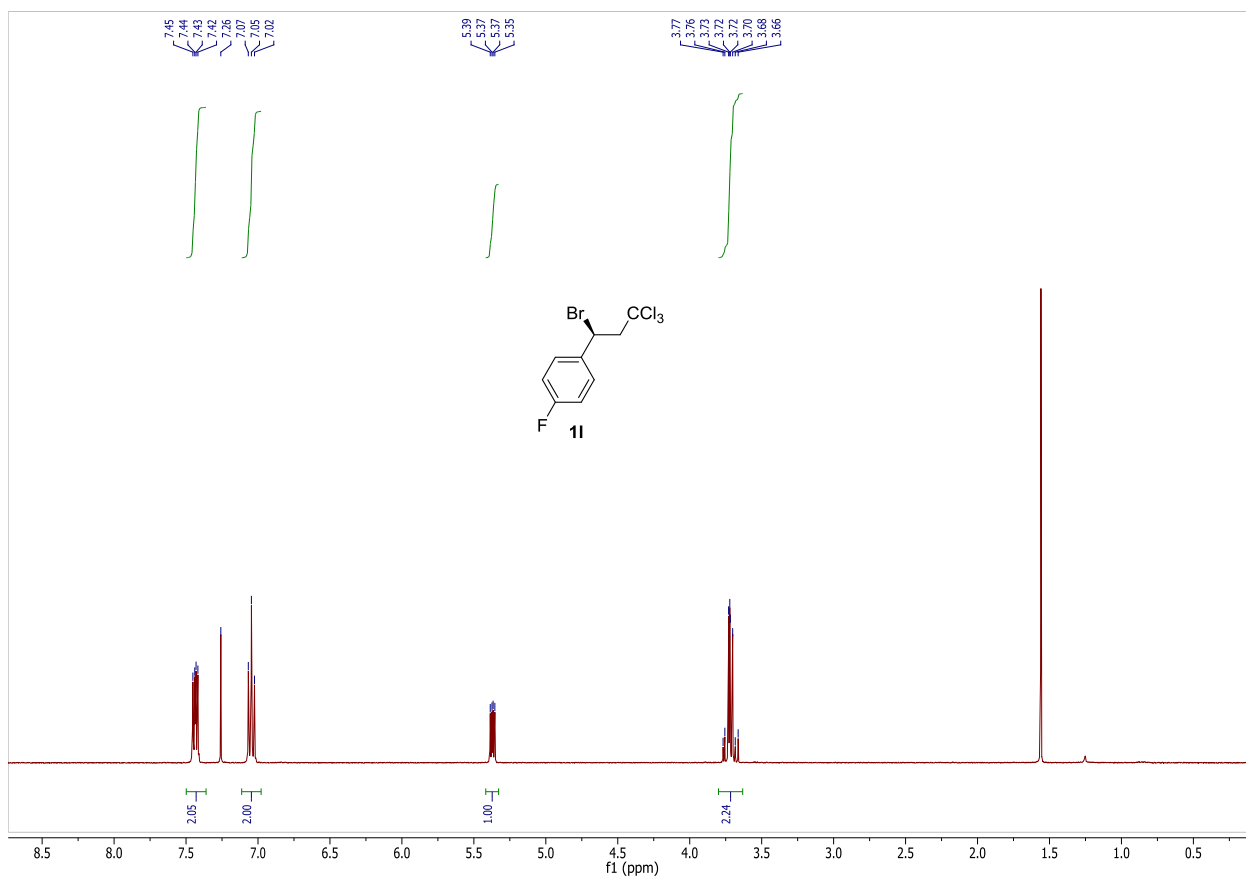

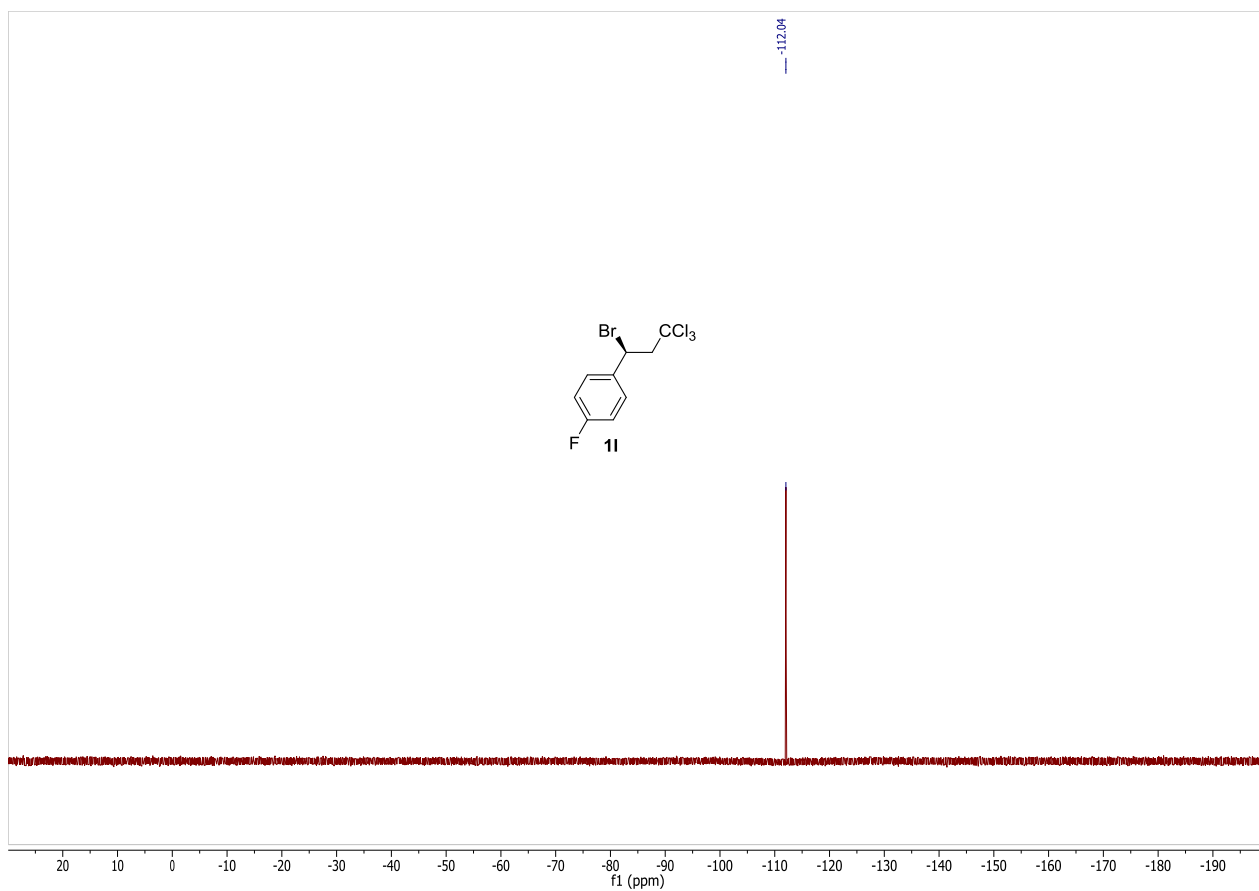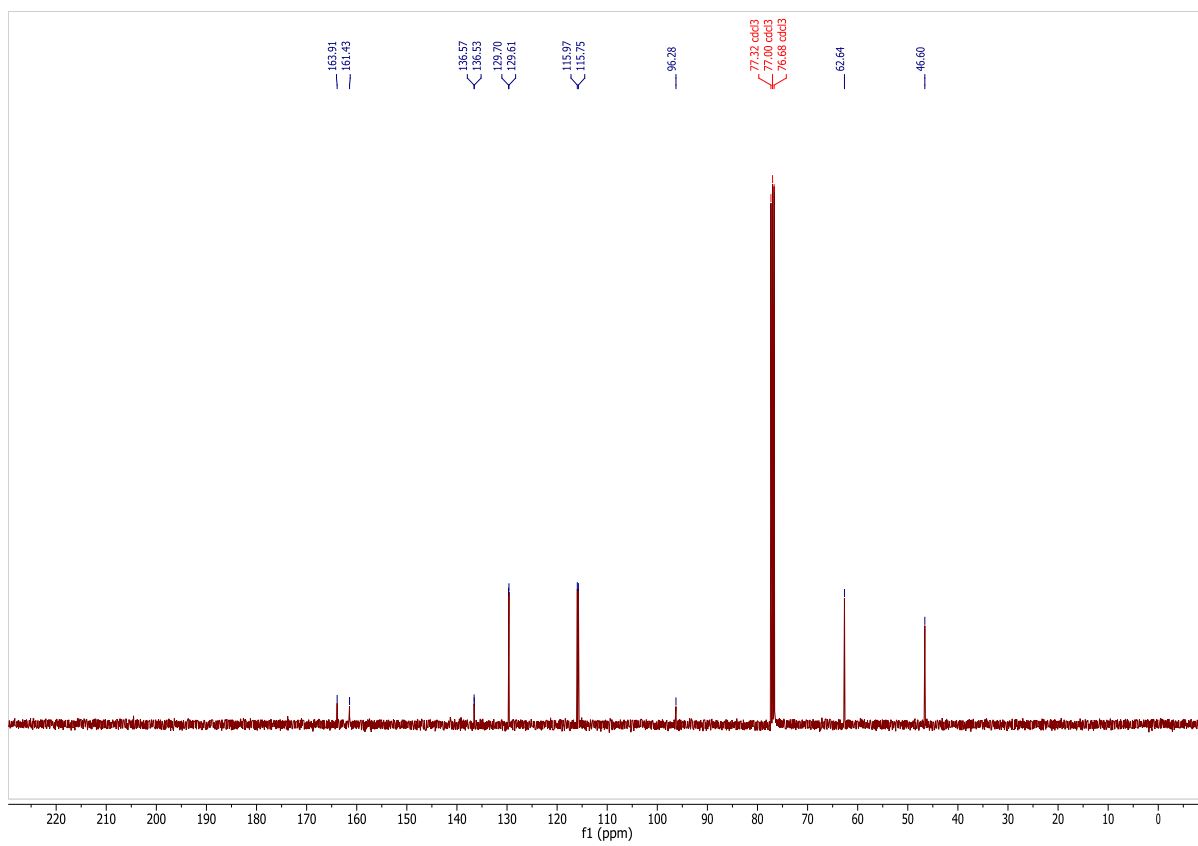

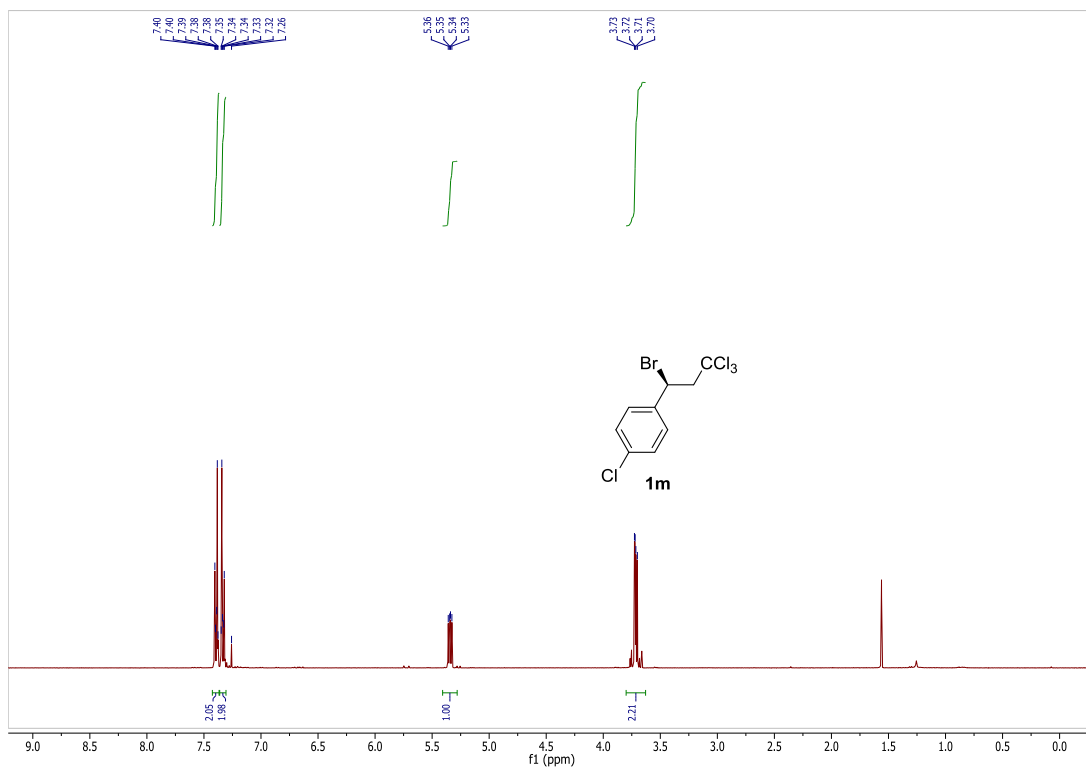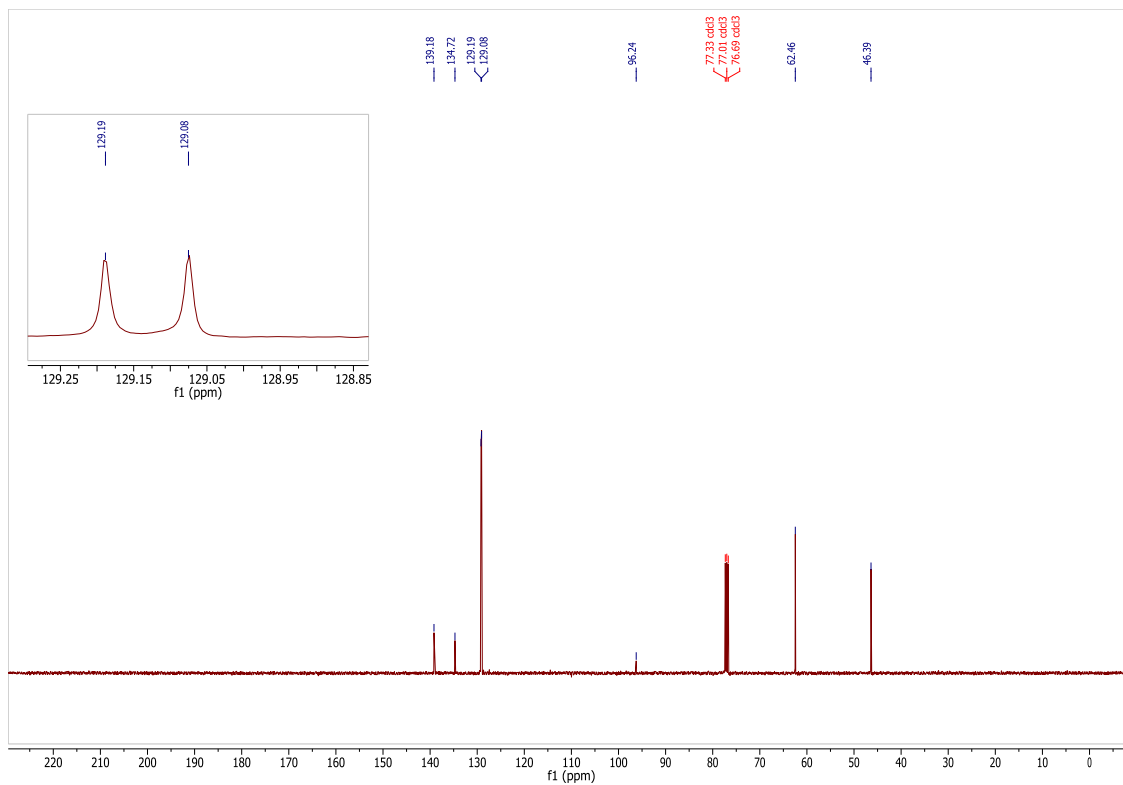

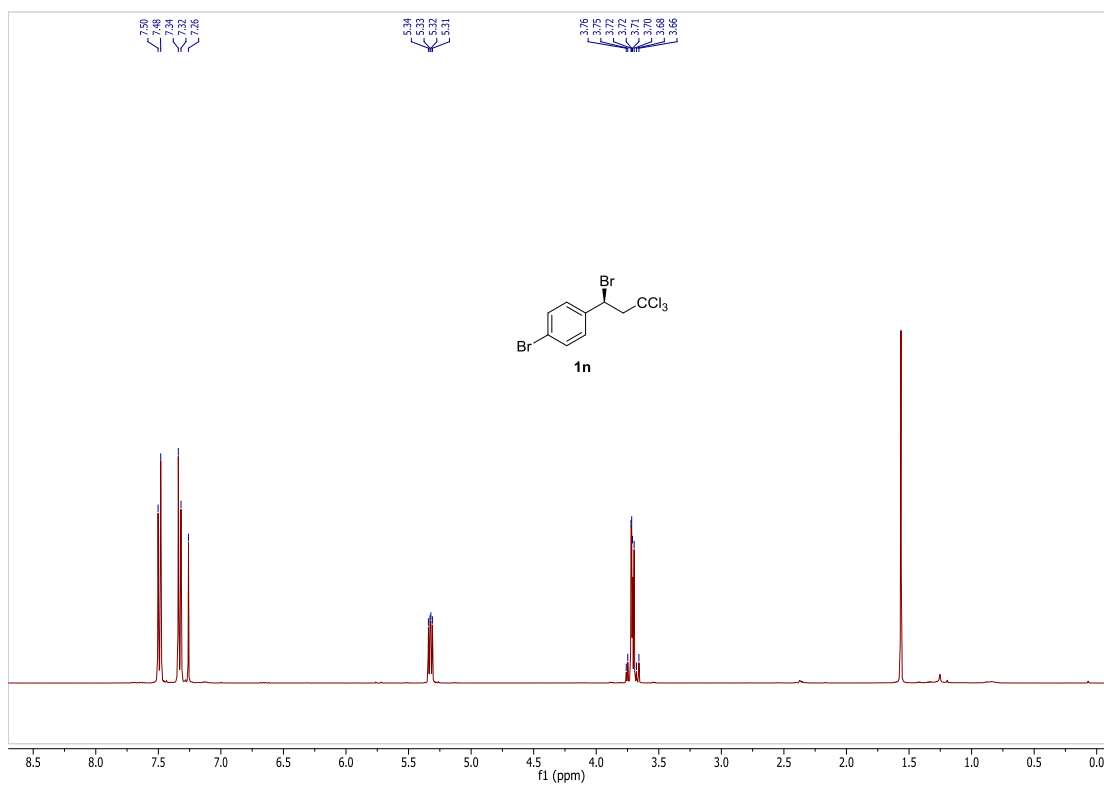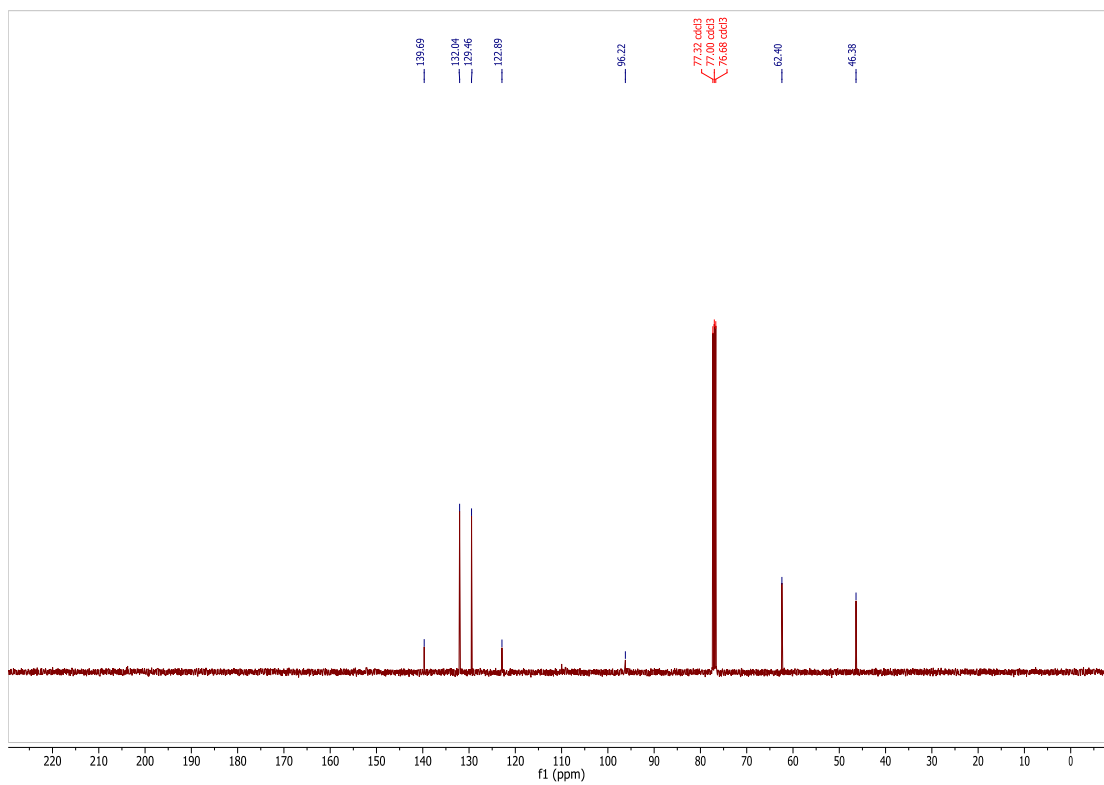

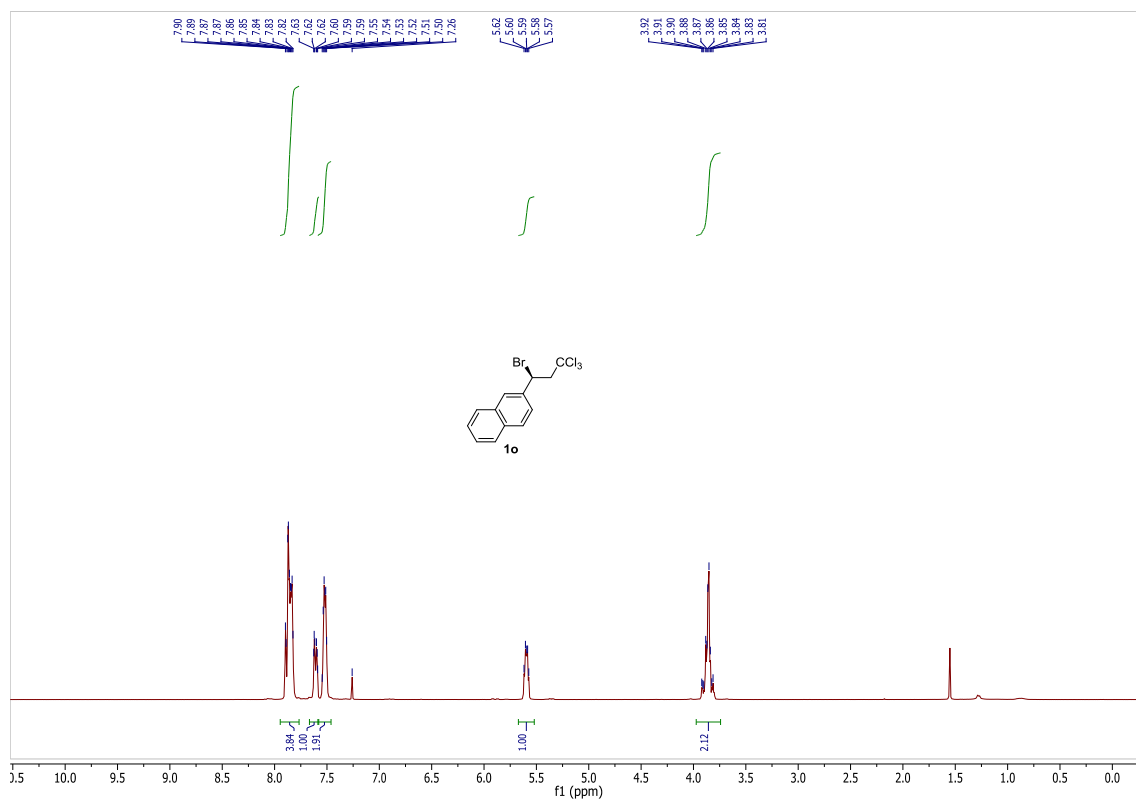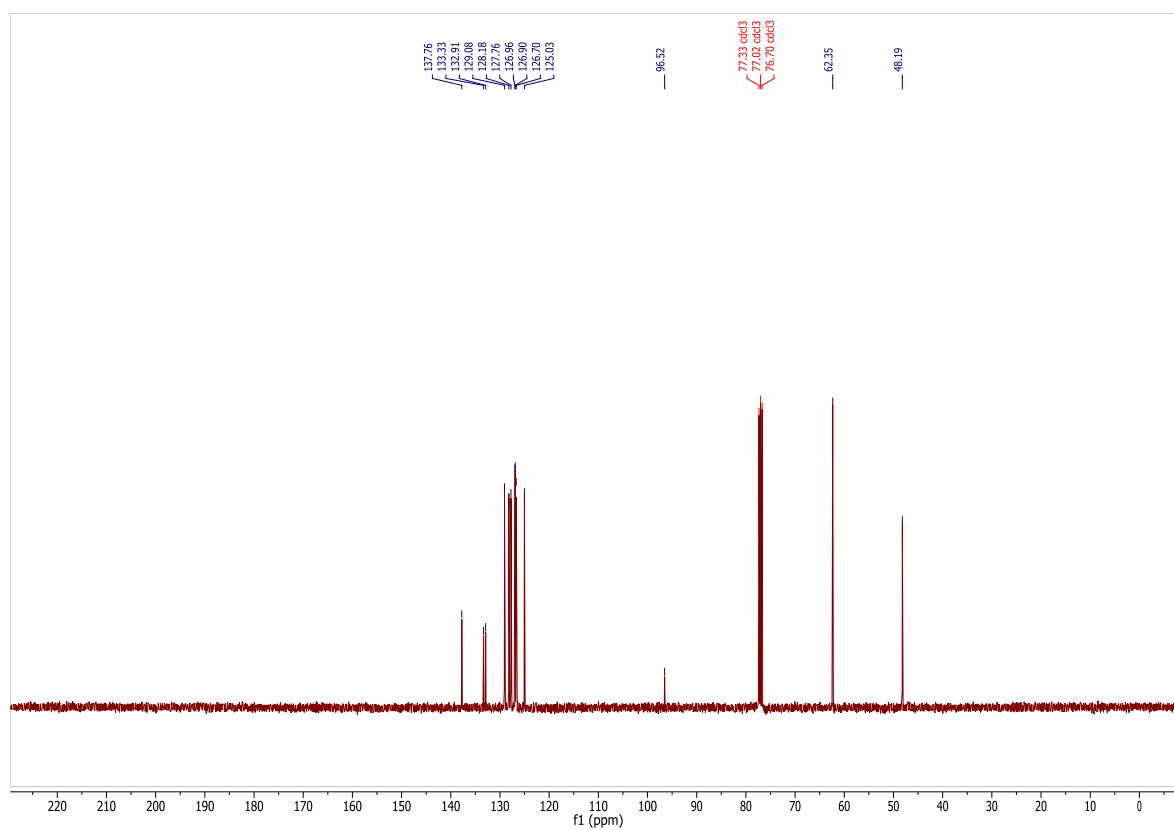



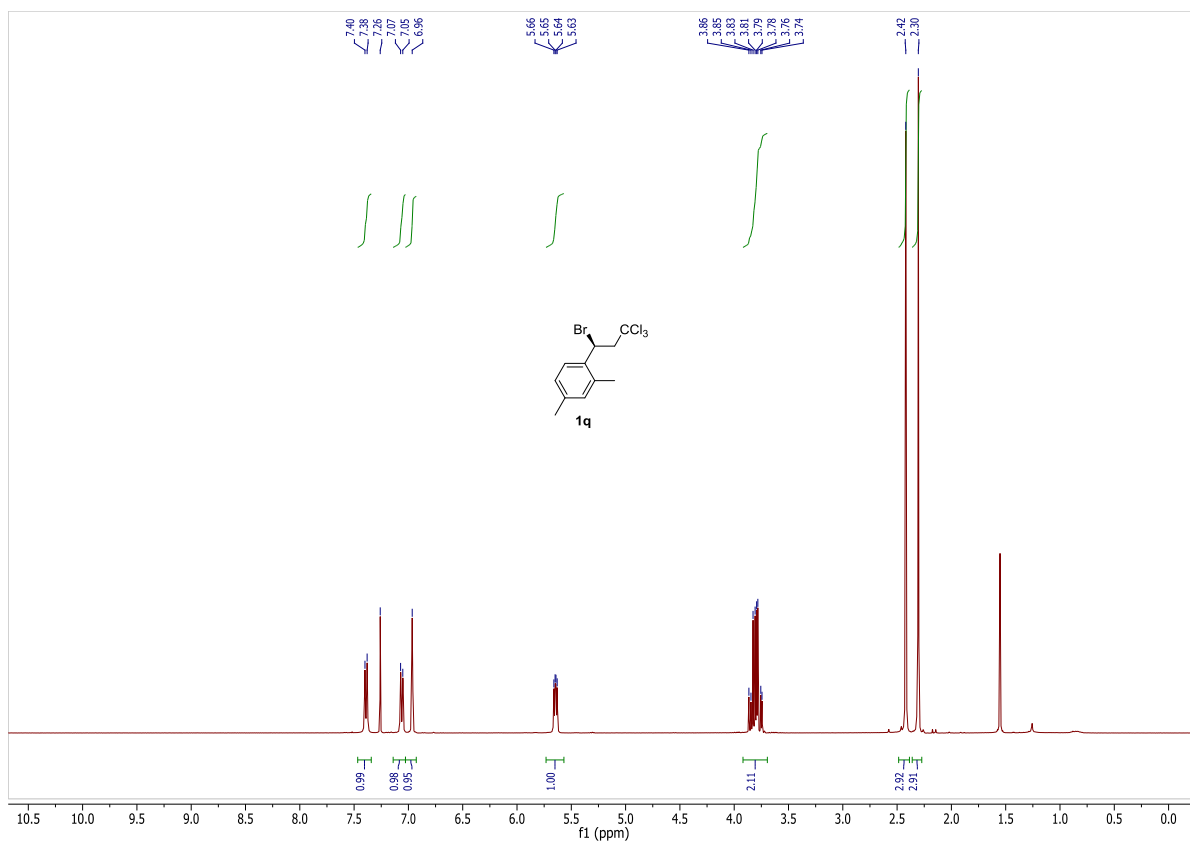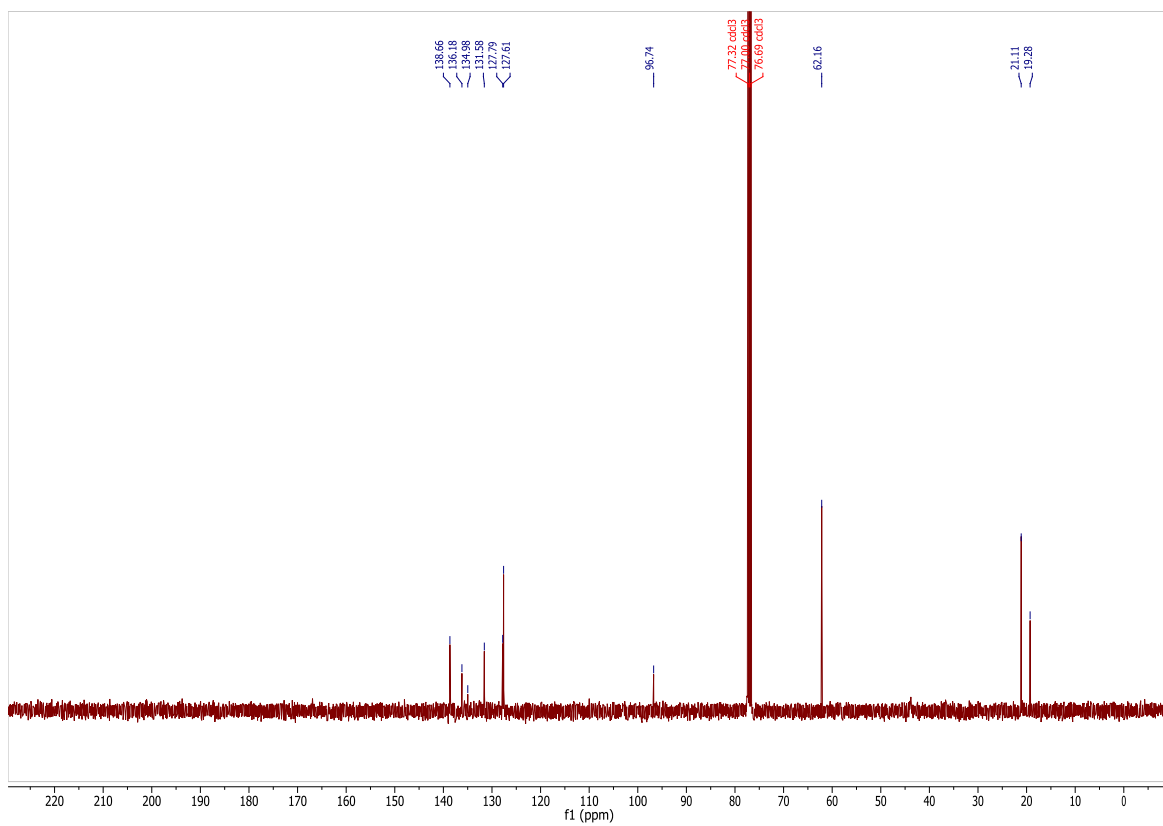

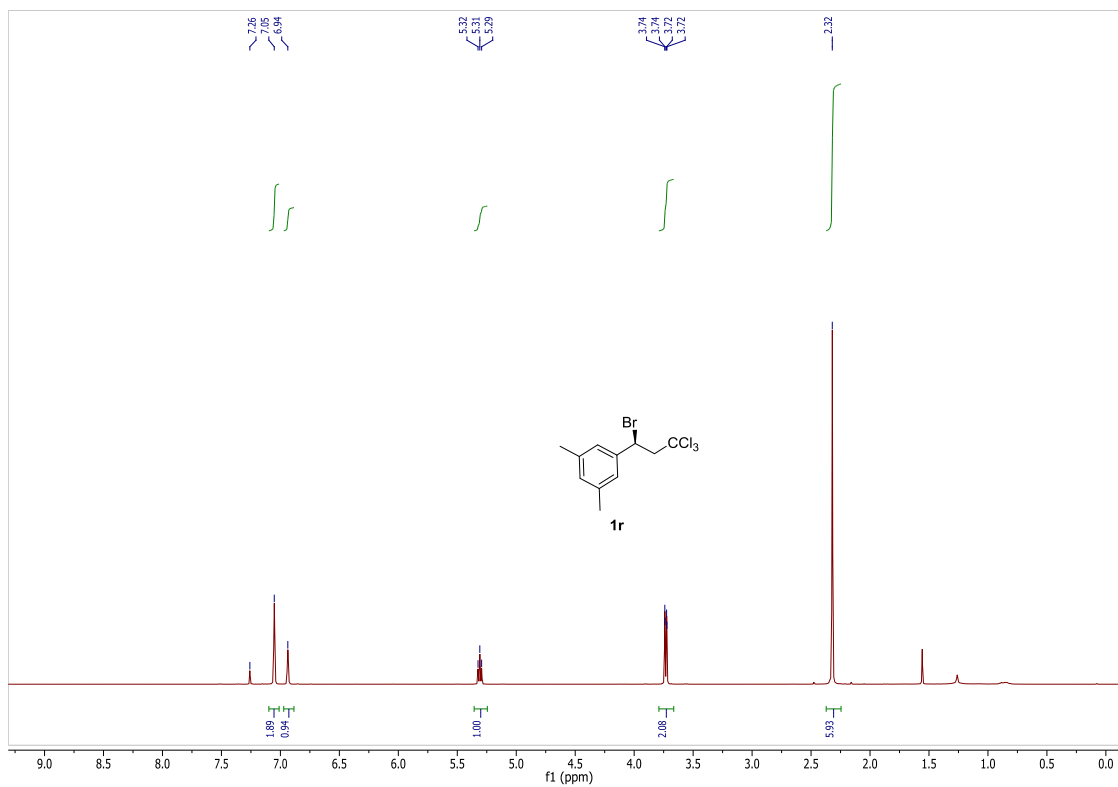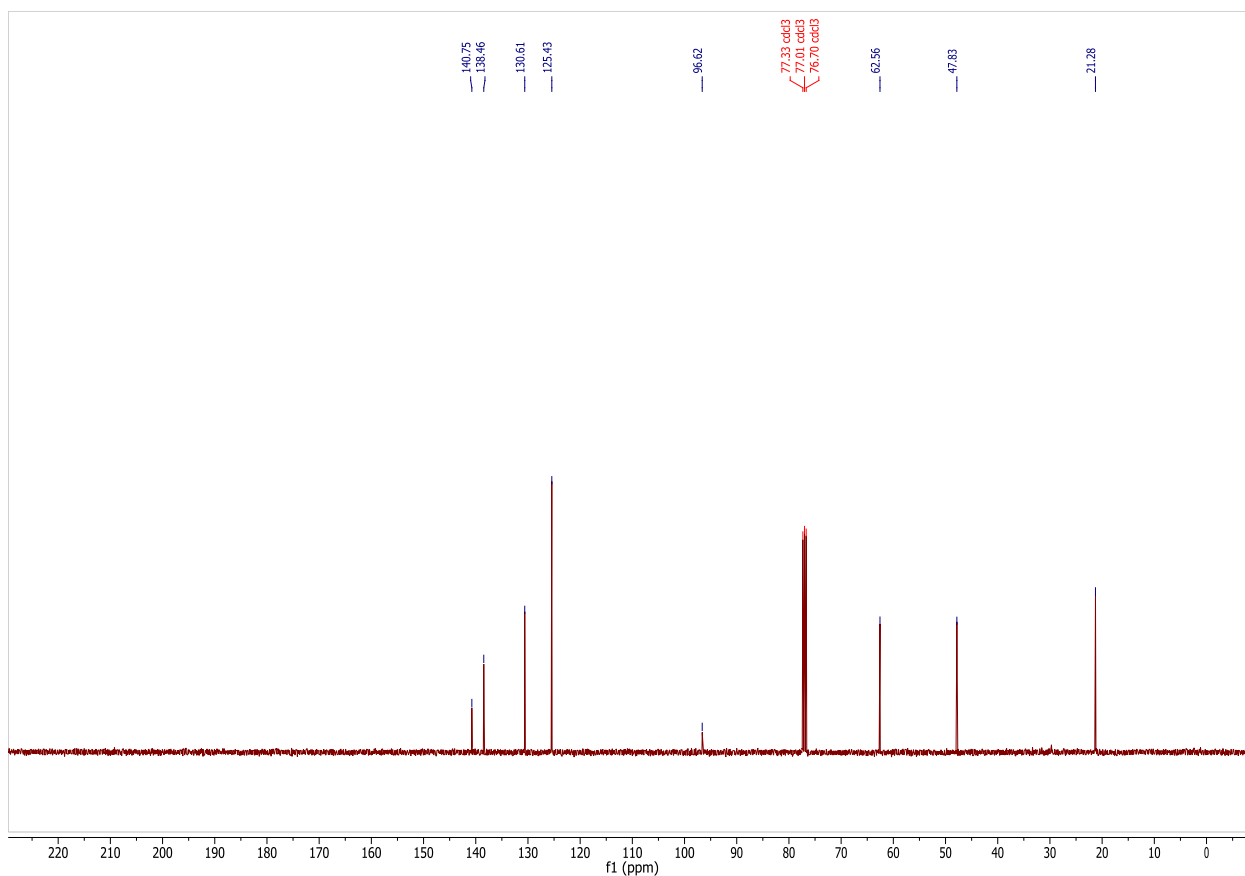

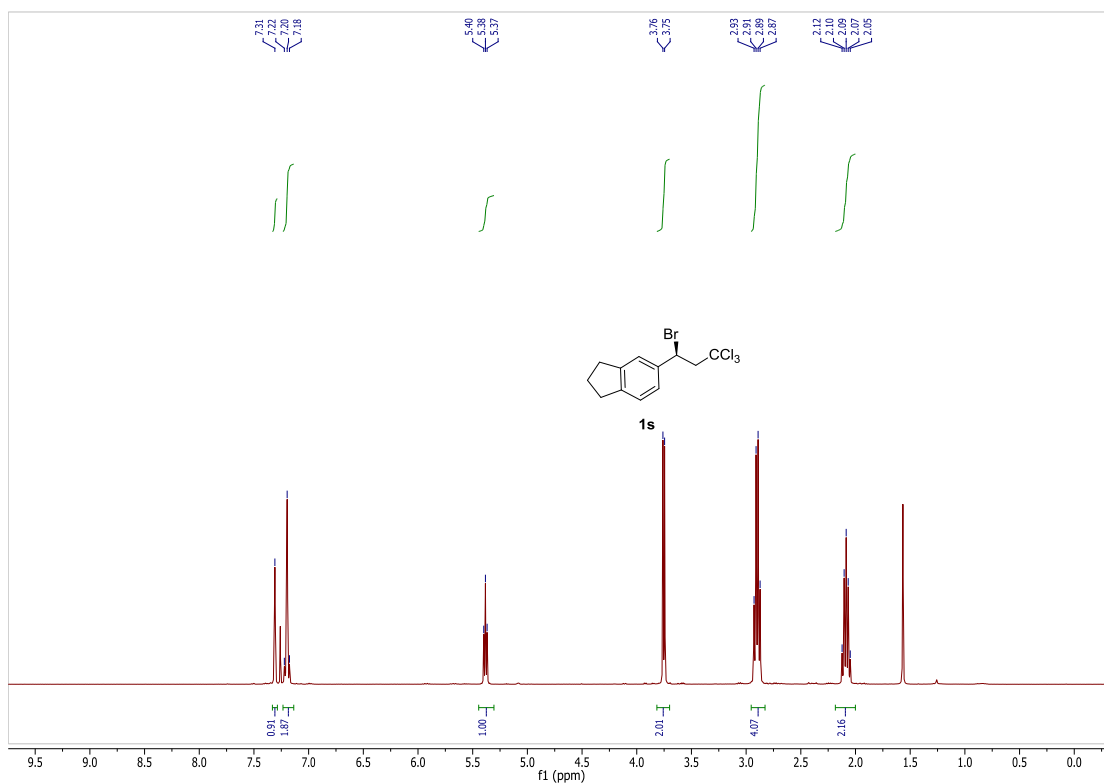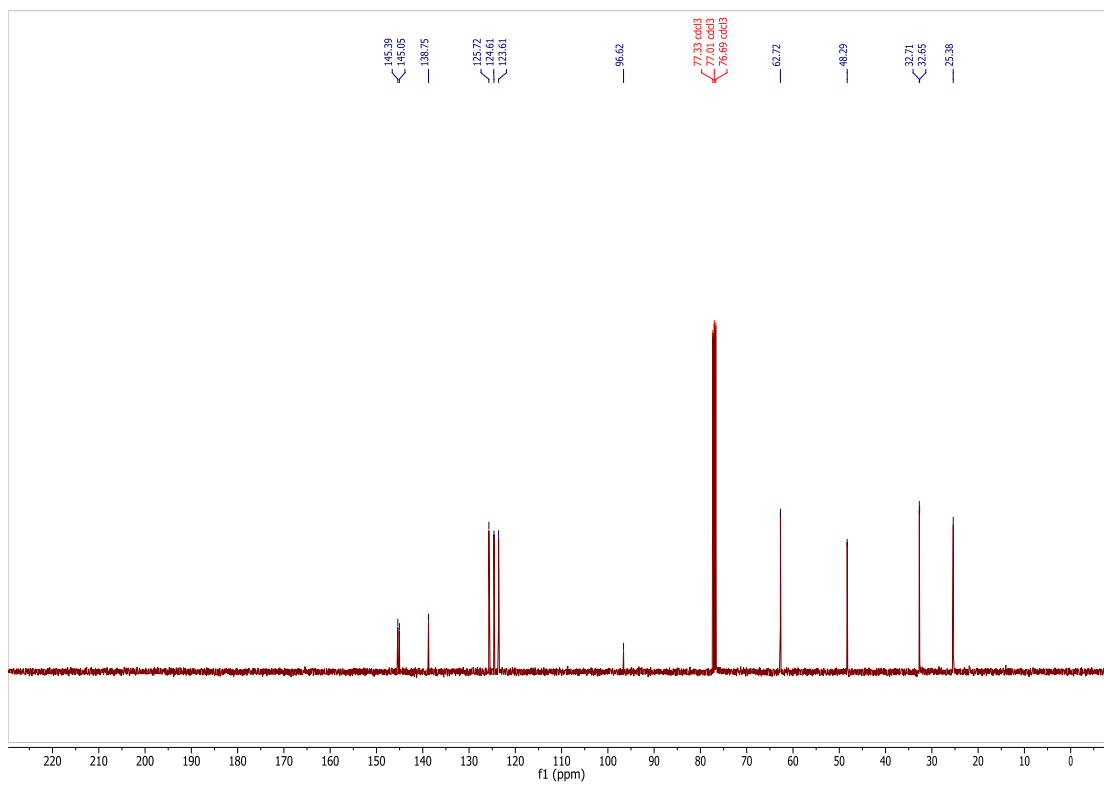

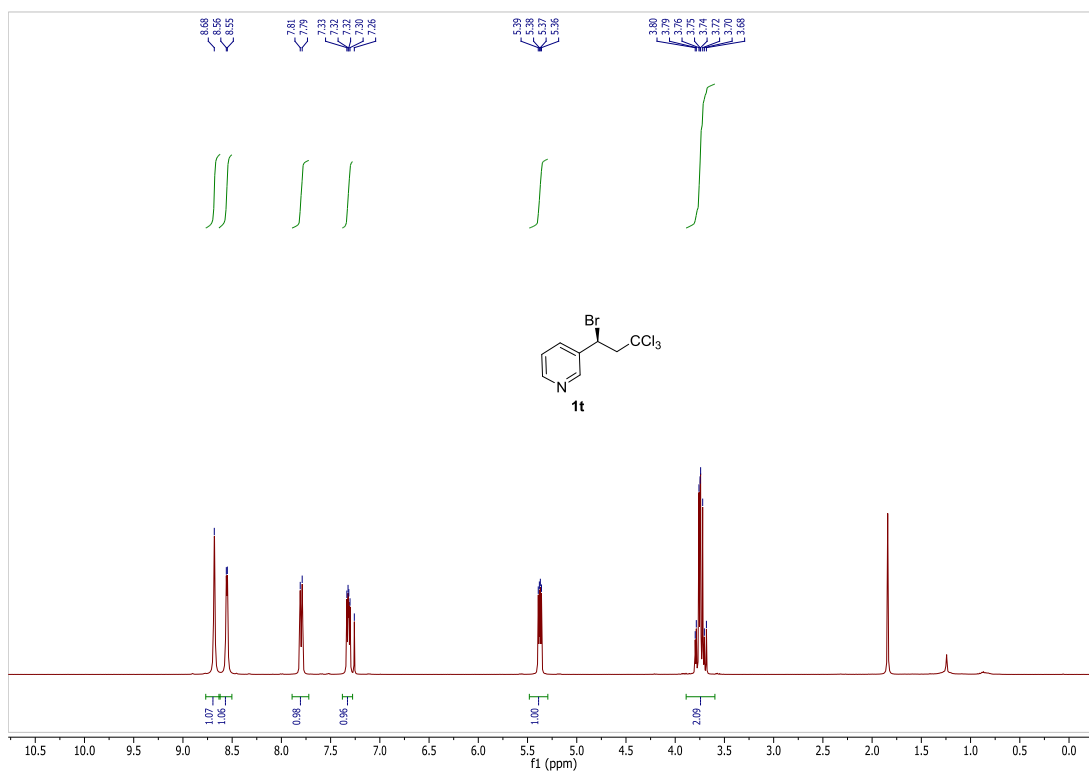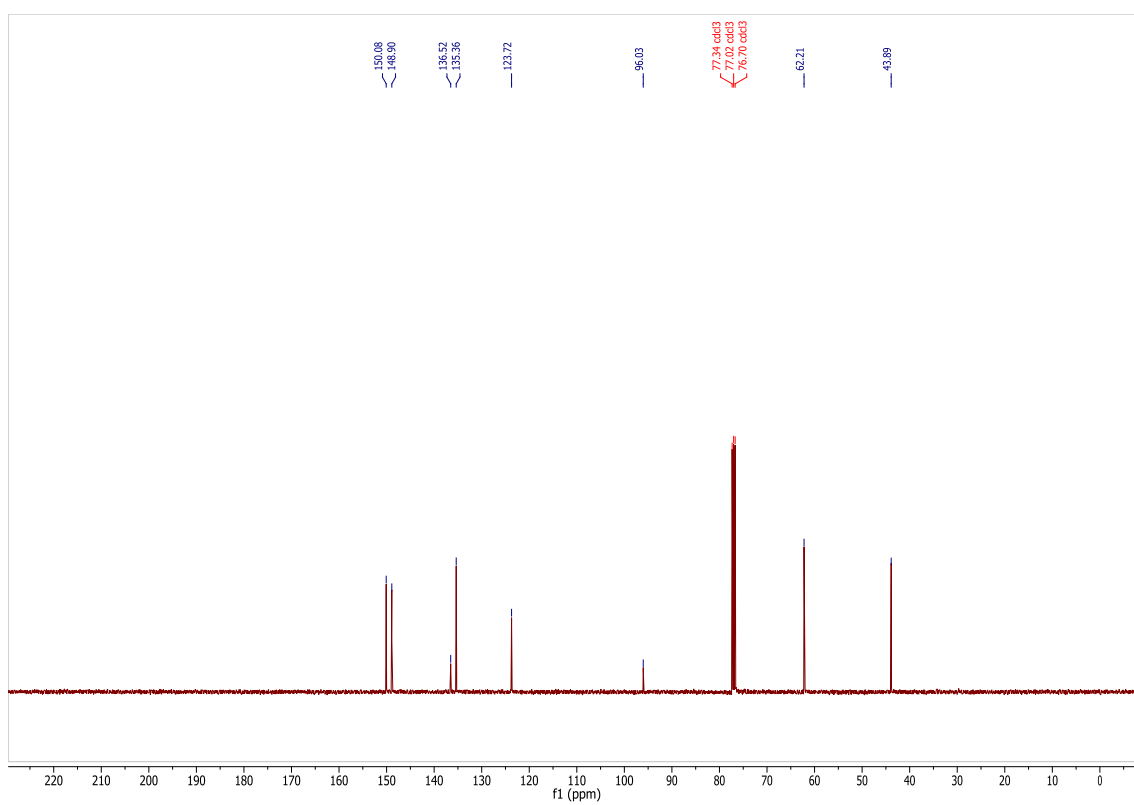

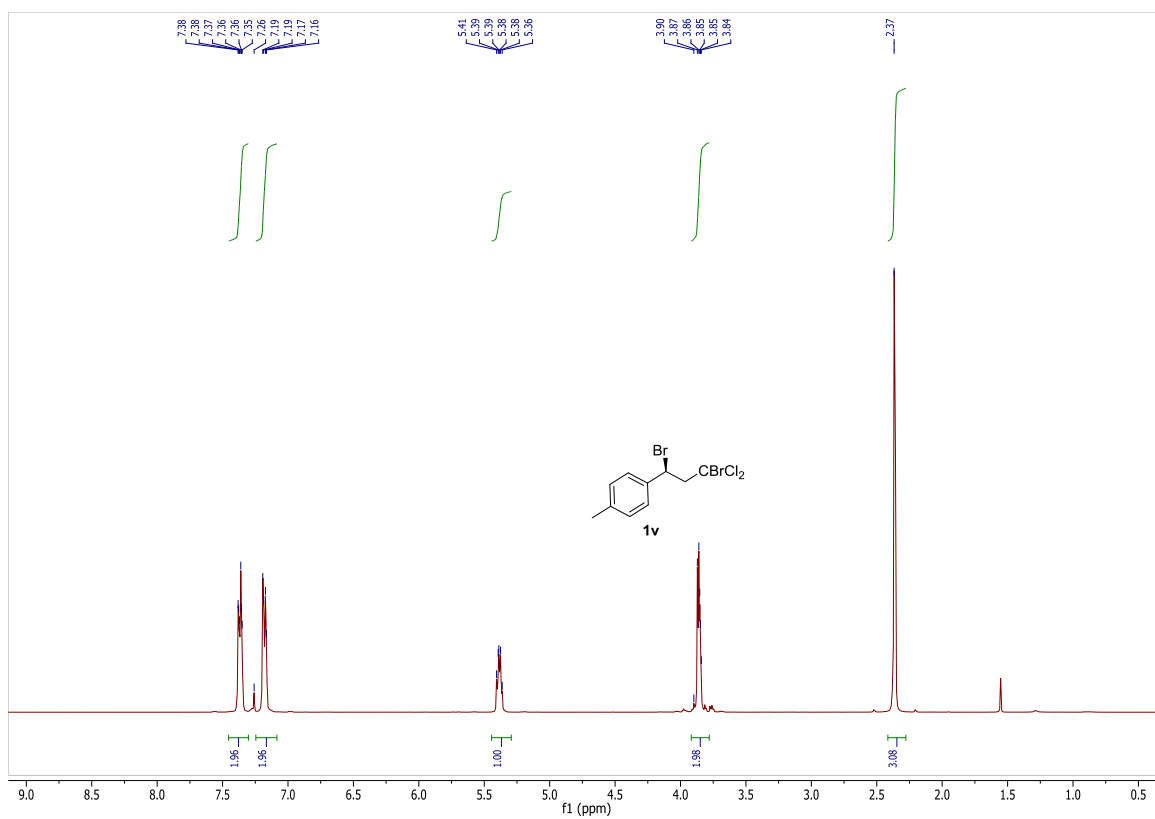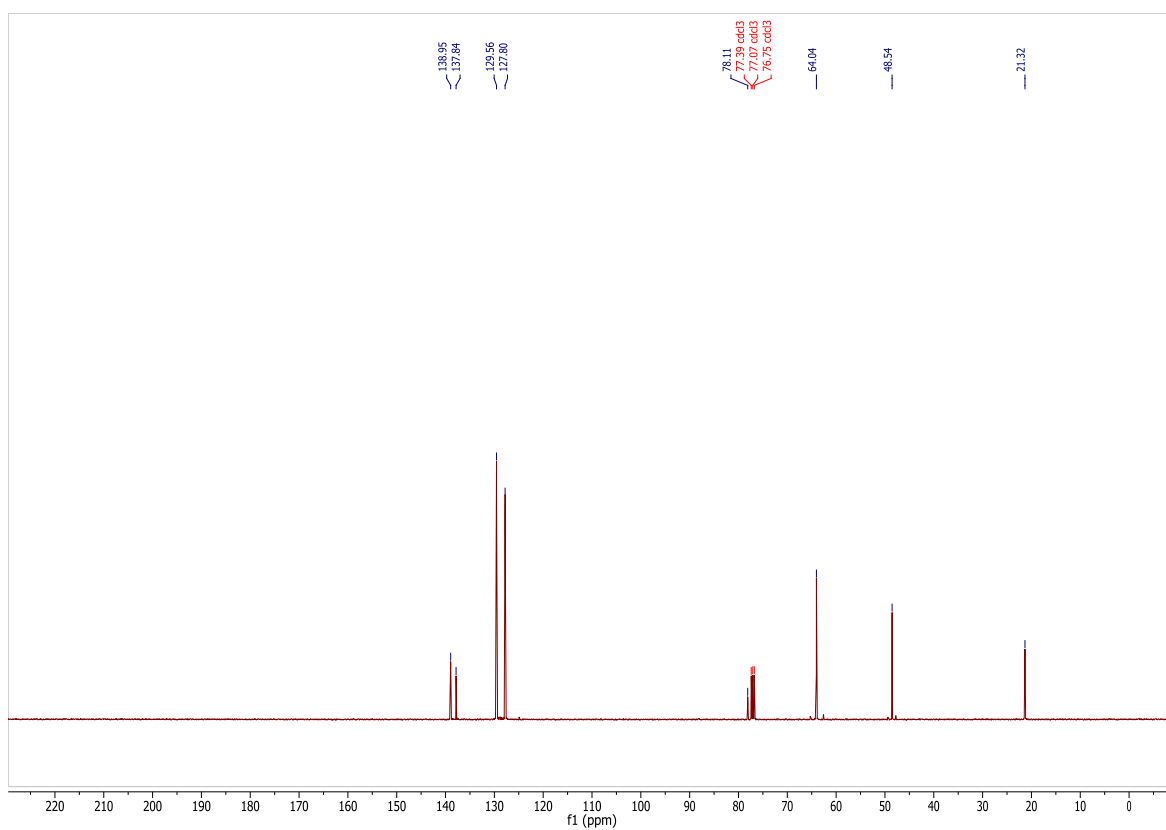

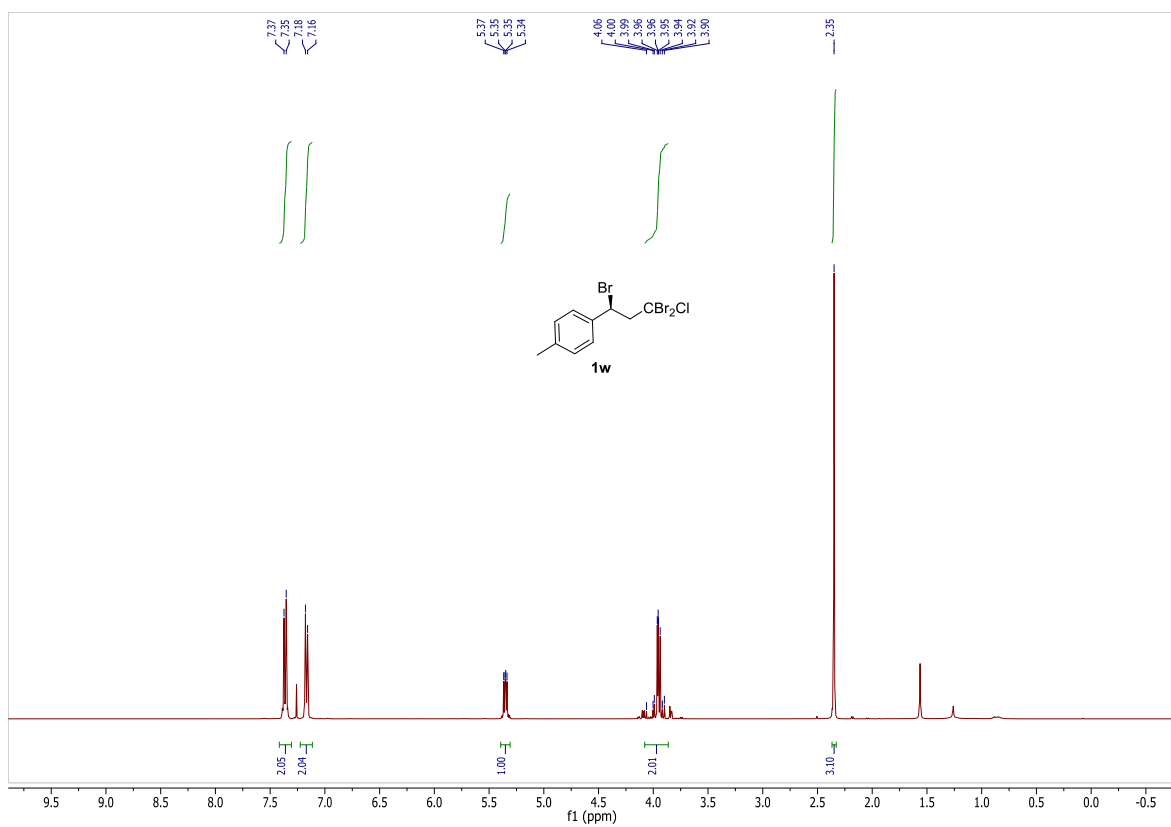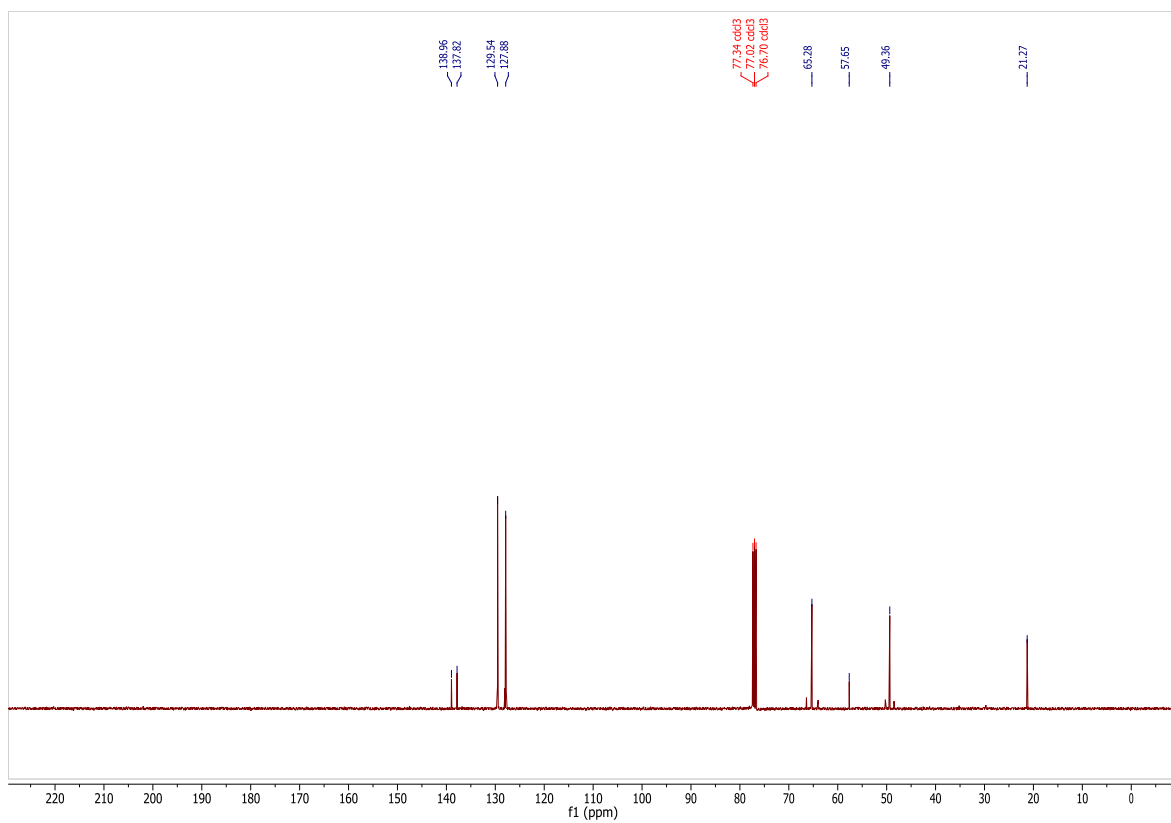

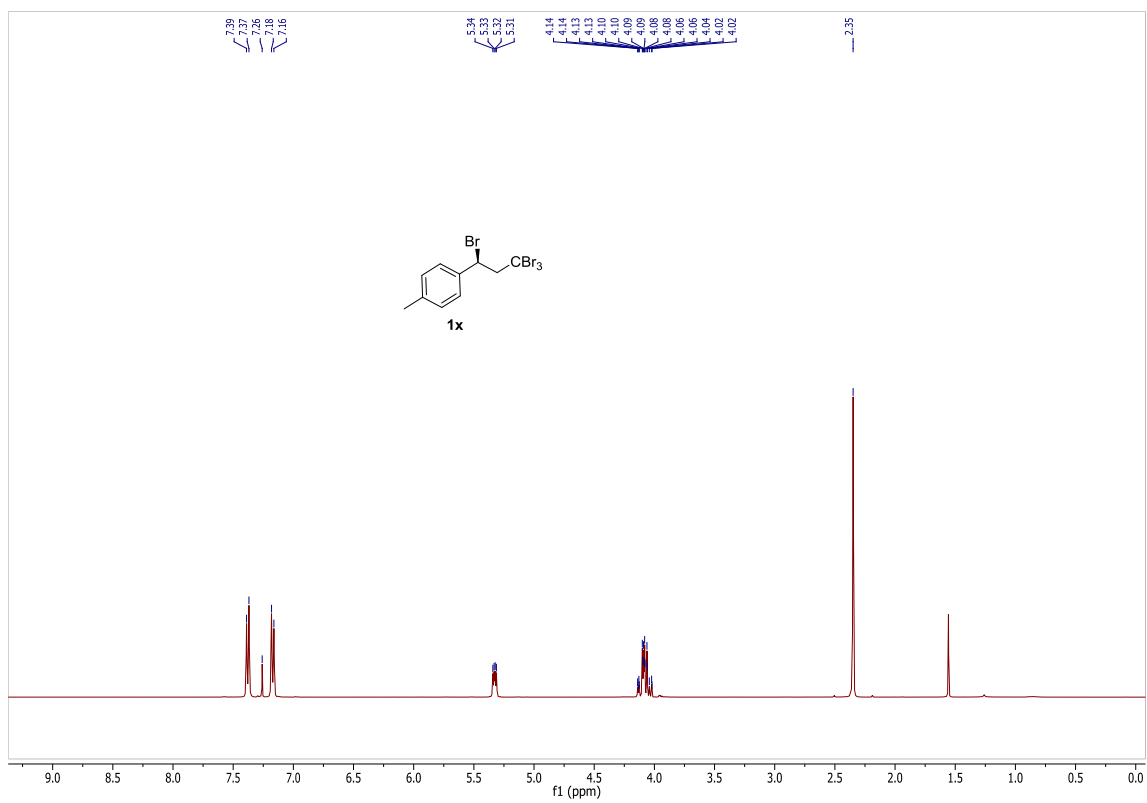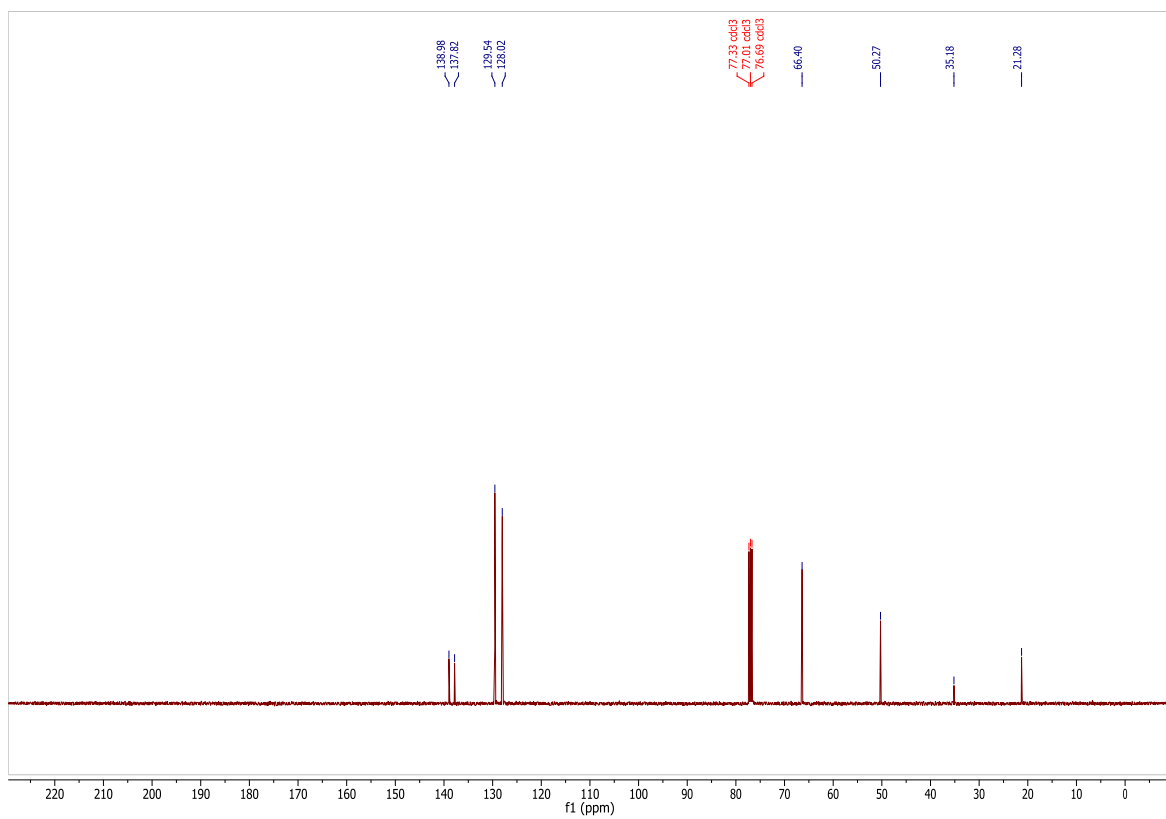

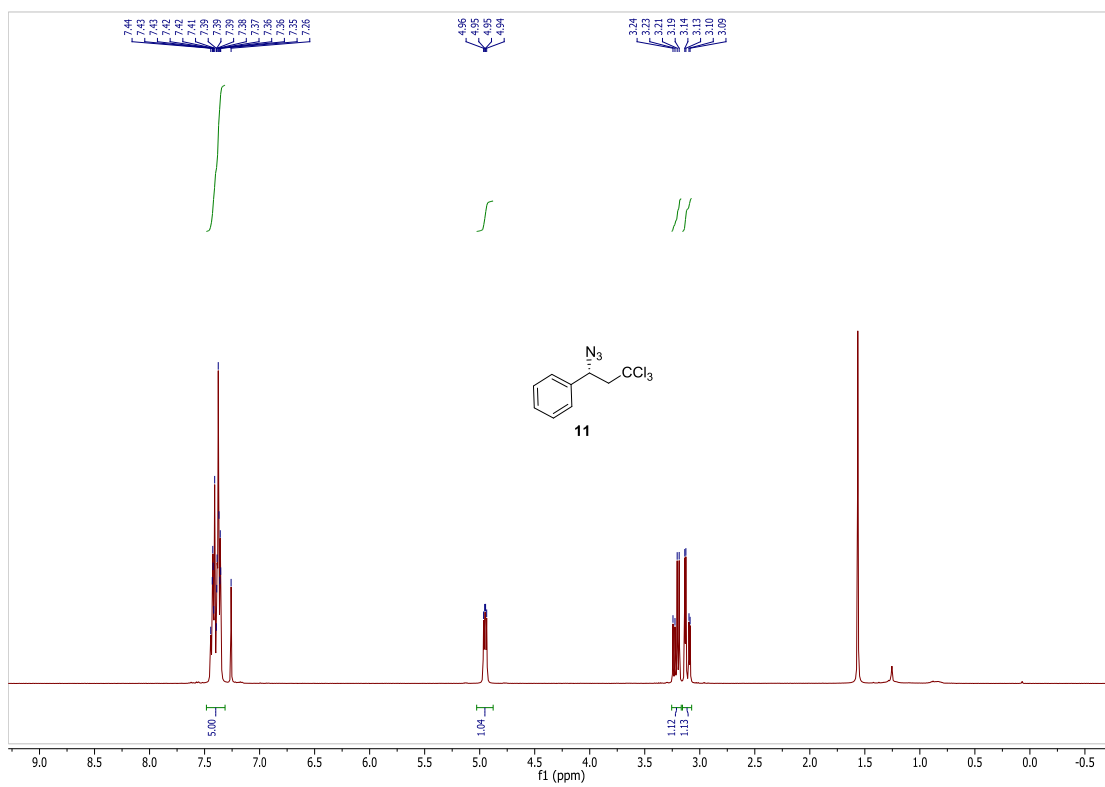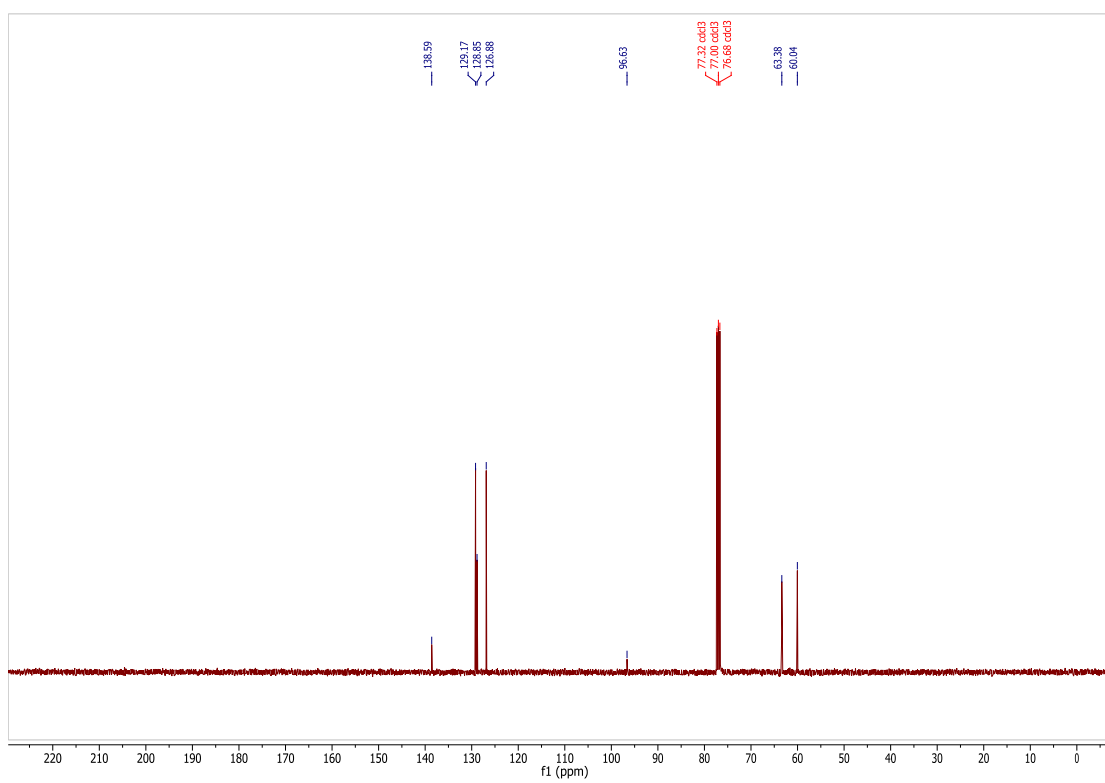



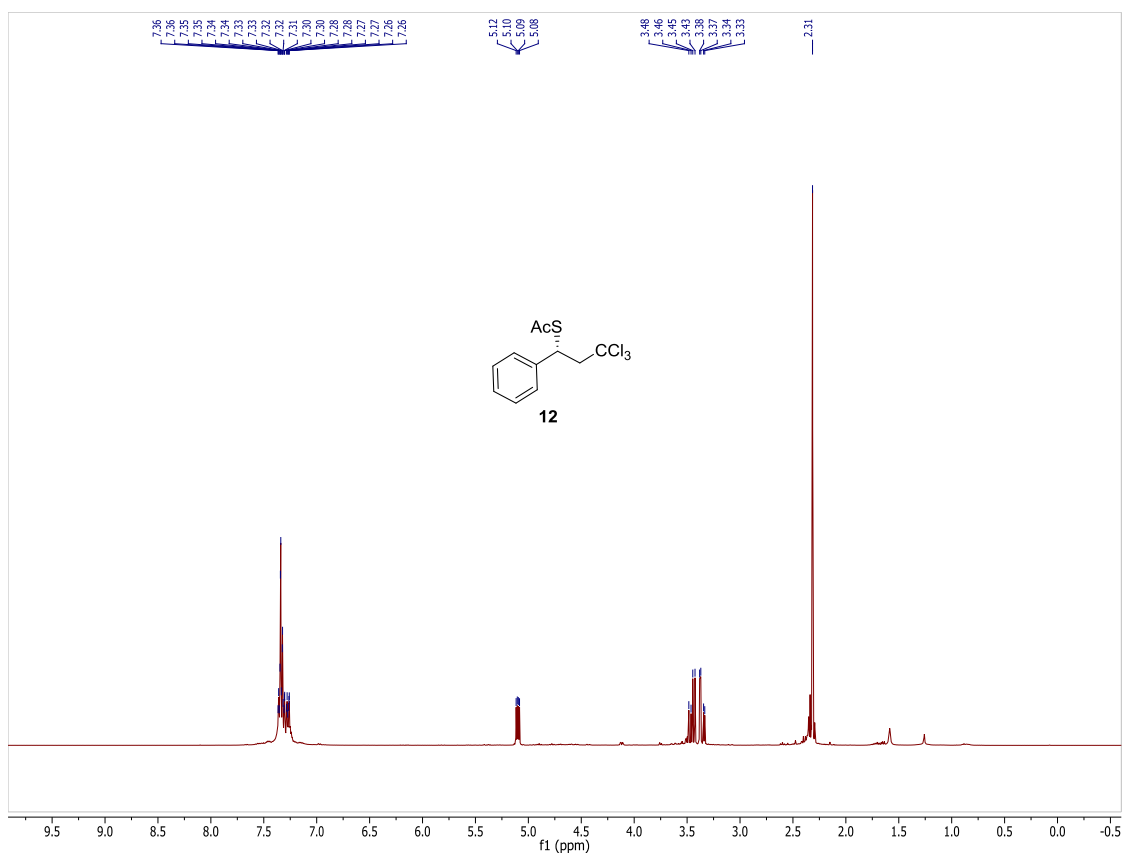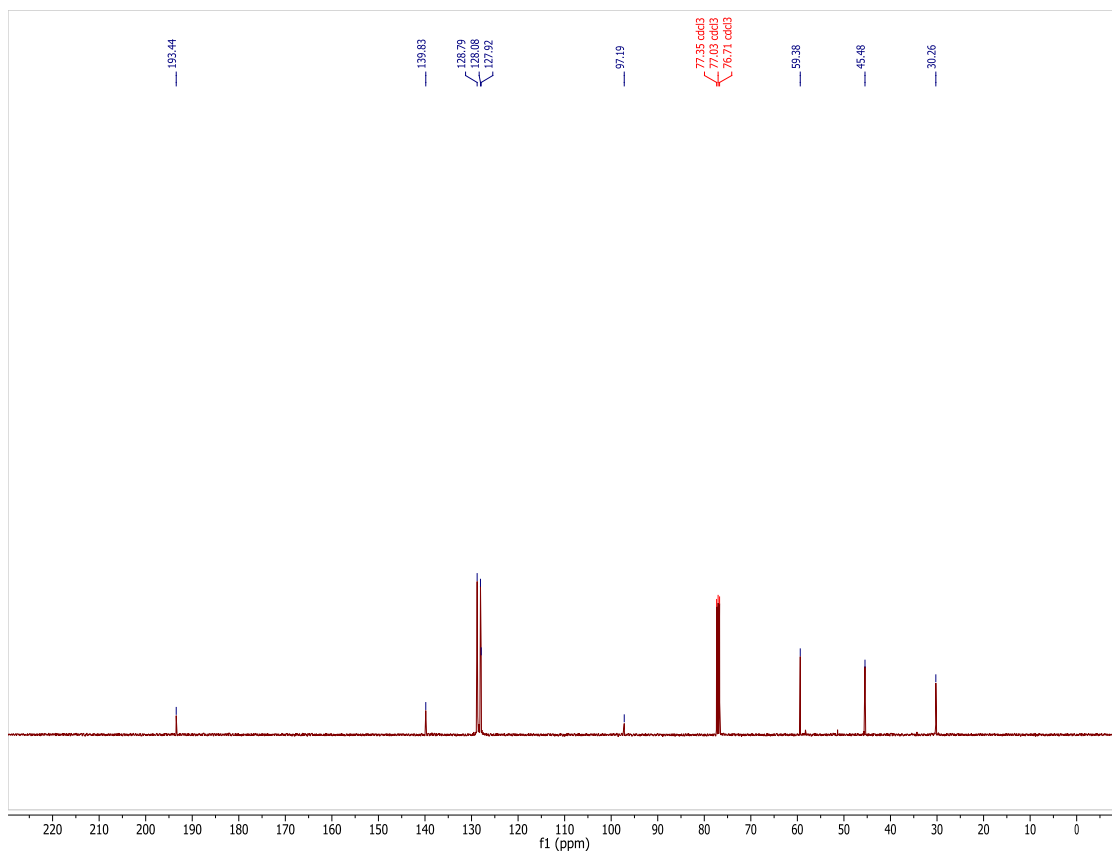

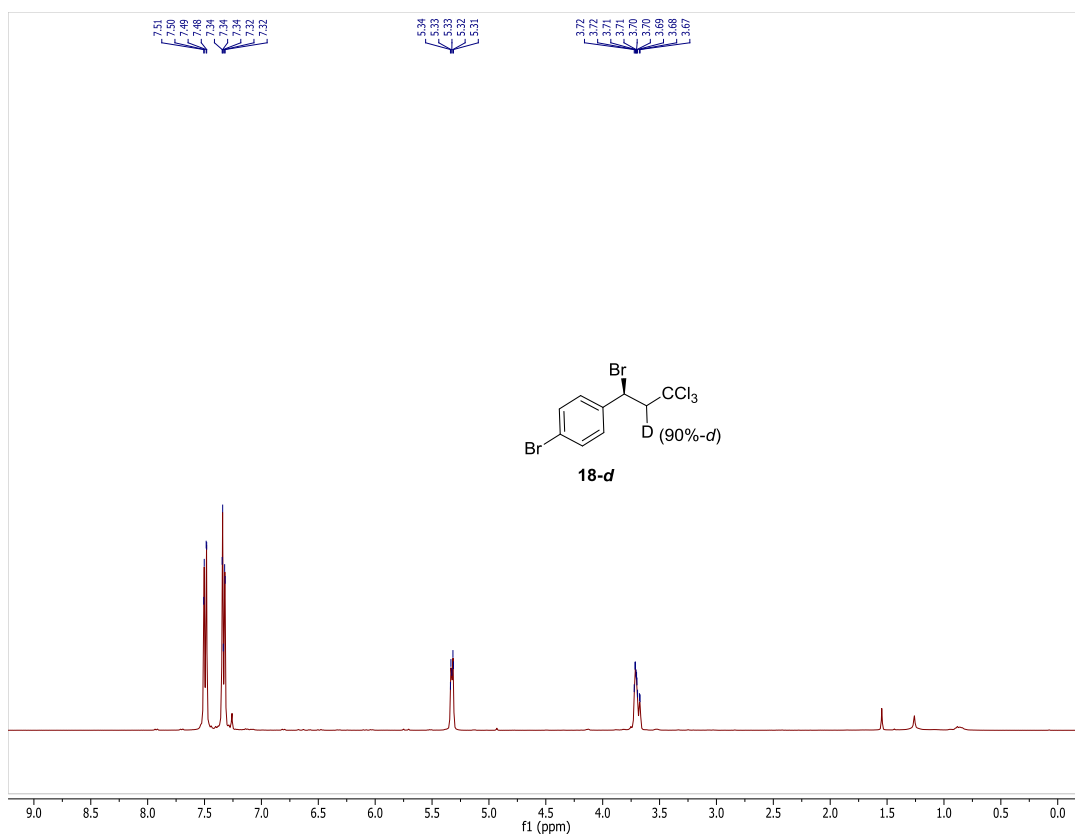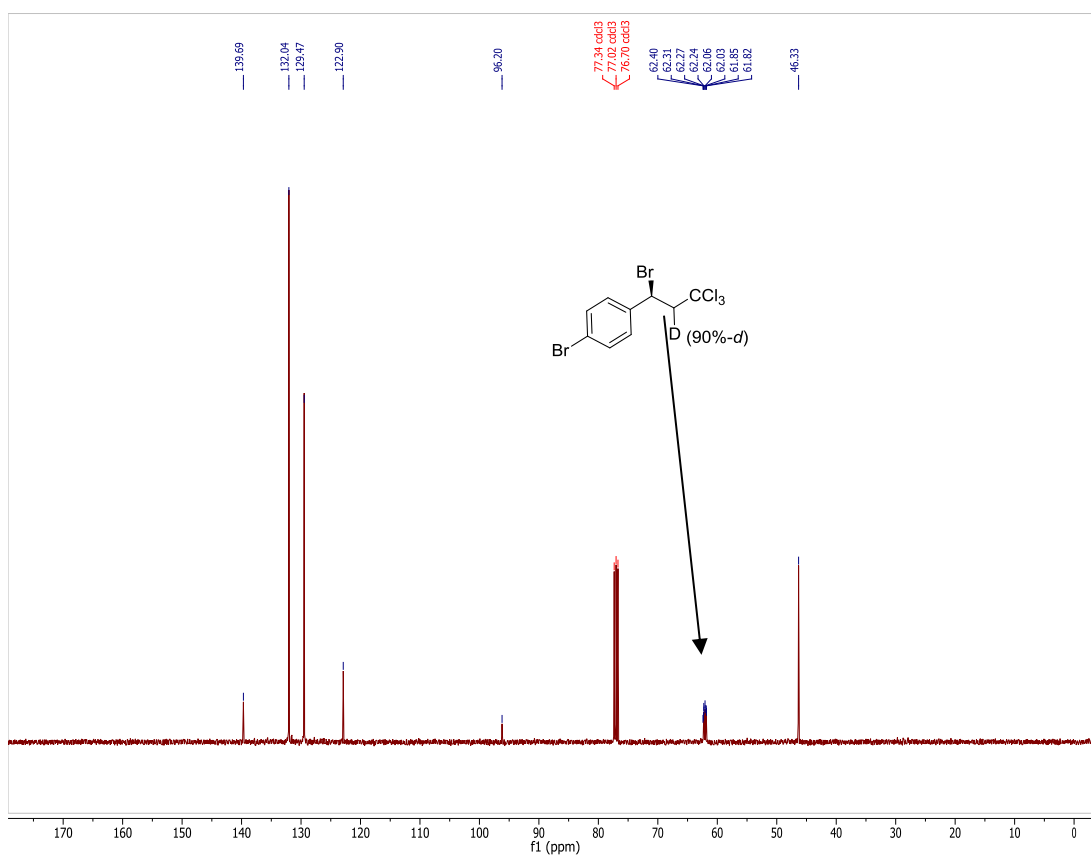

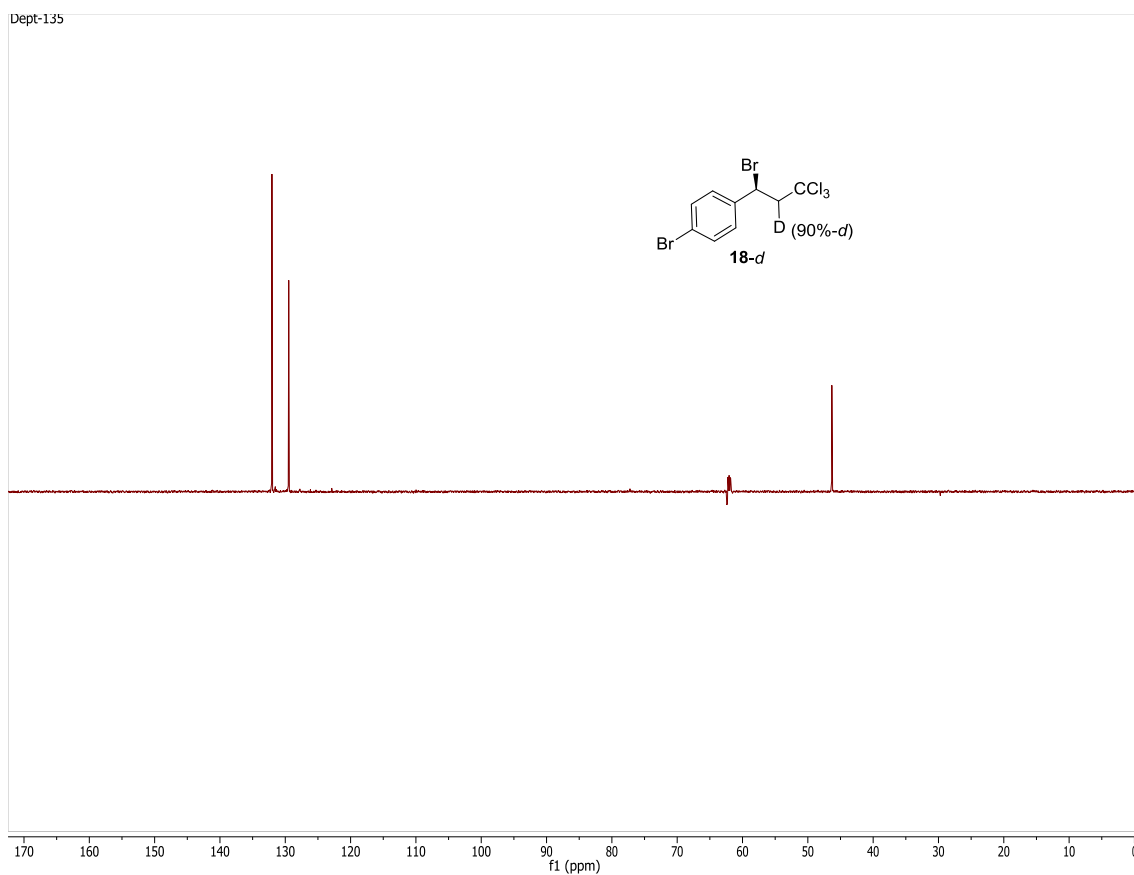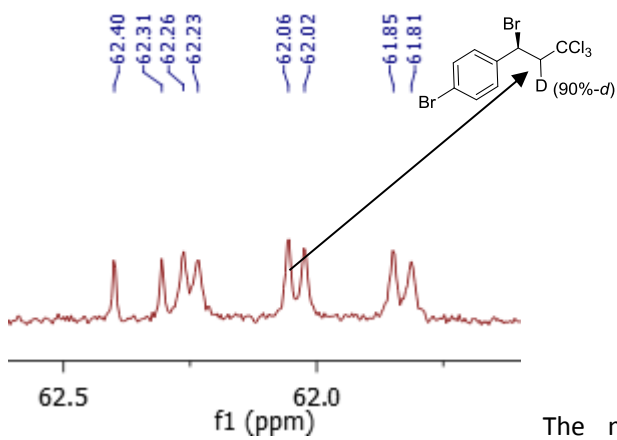

The major peaks were the desired product (dr = 1:1, double-triplet, coupling with Deuterium). The assignment of the two additional peaks were shown below.

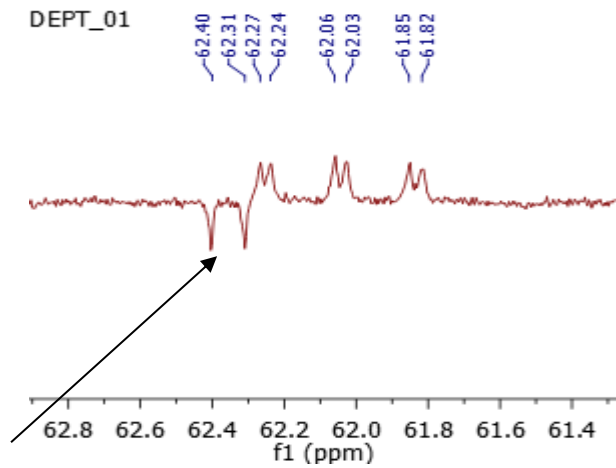

Based on dept135, the additional two peaks are CH<sub>2</sub>.

These two peaks were assigned by comparing with the chemical shift of authentic samples.

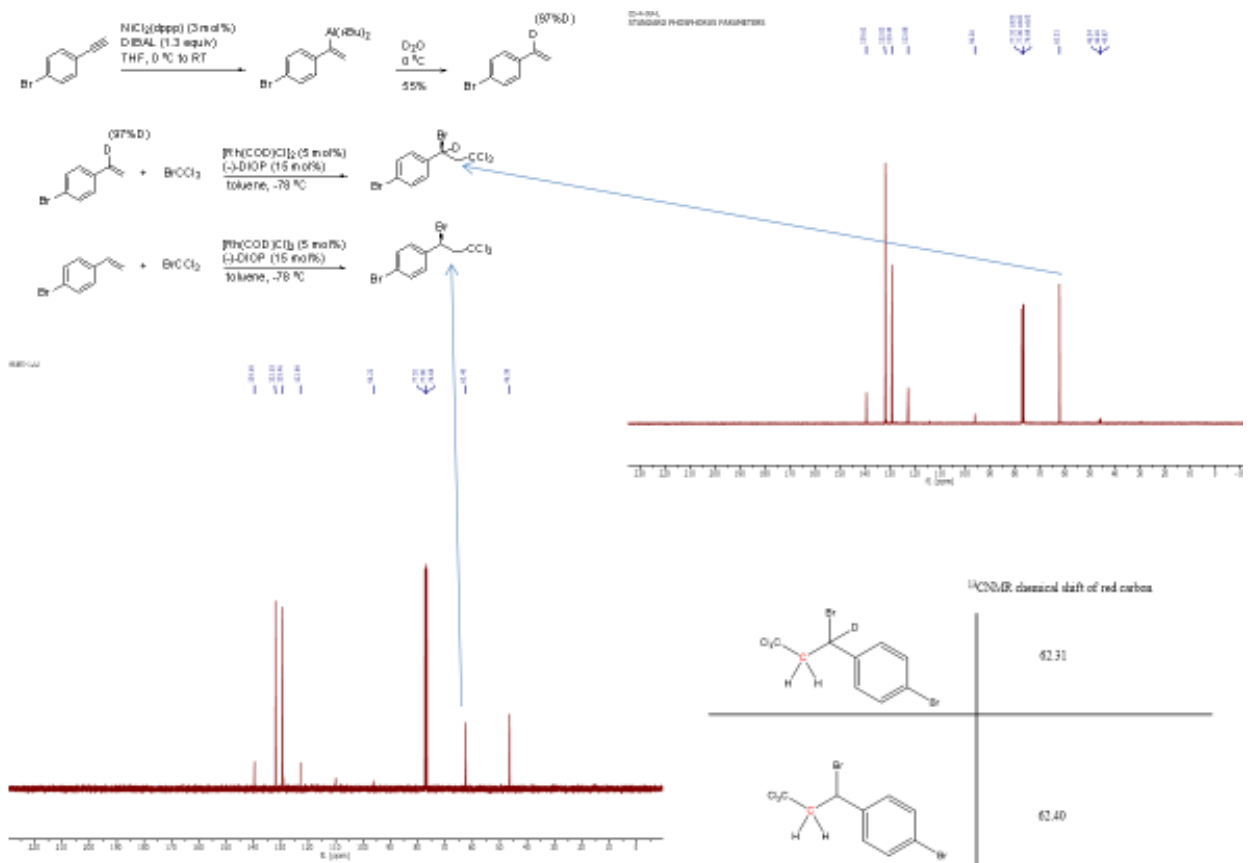

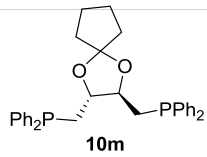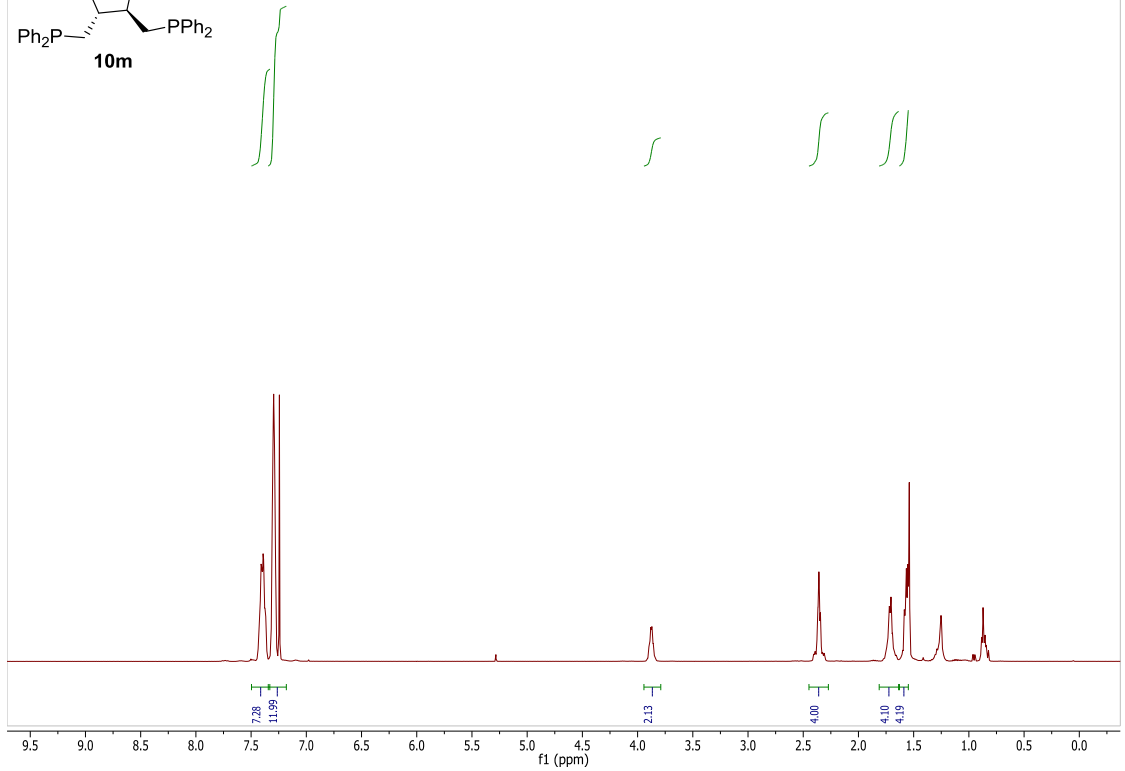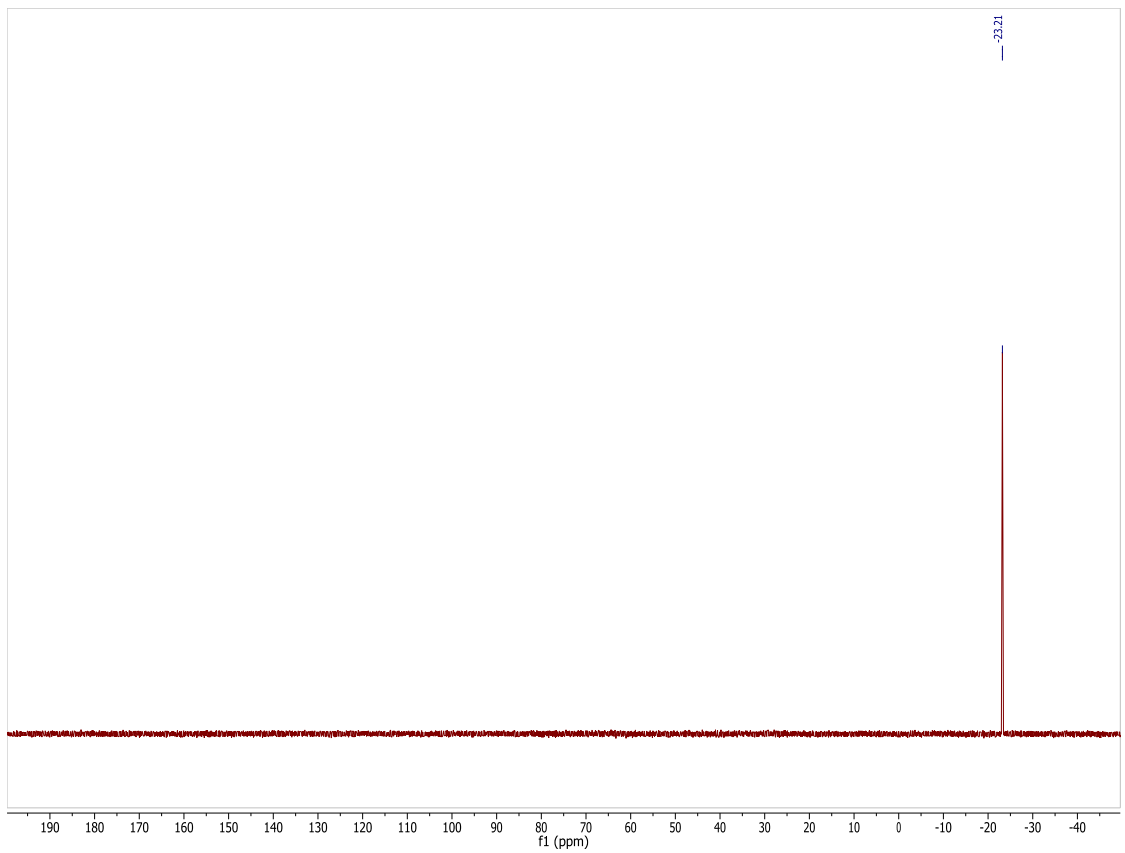

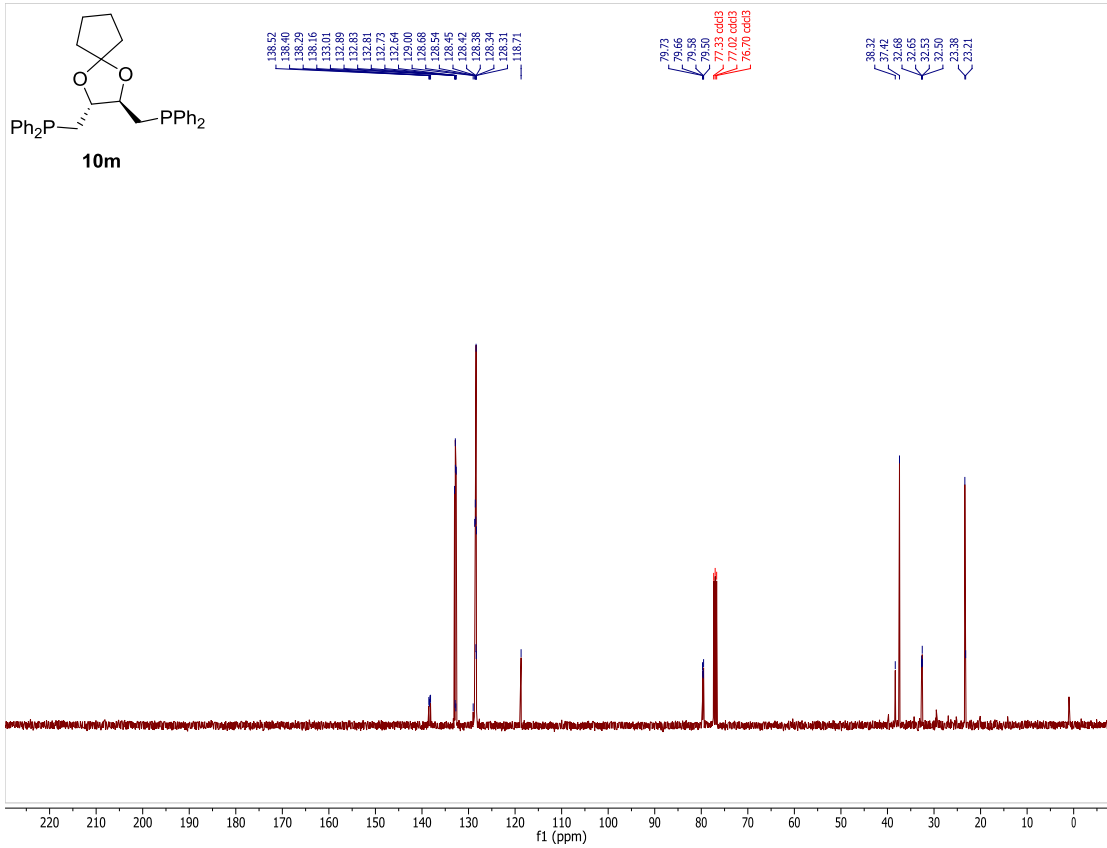

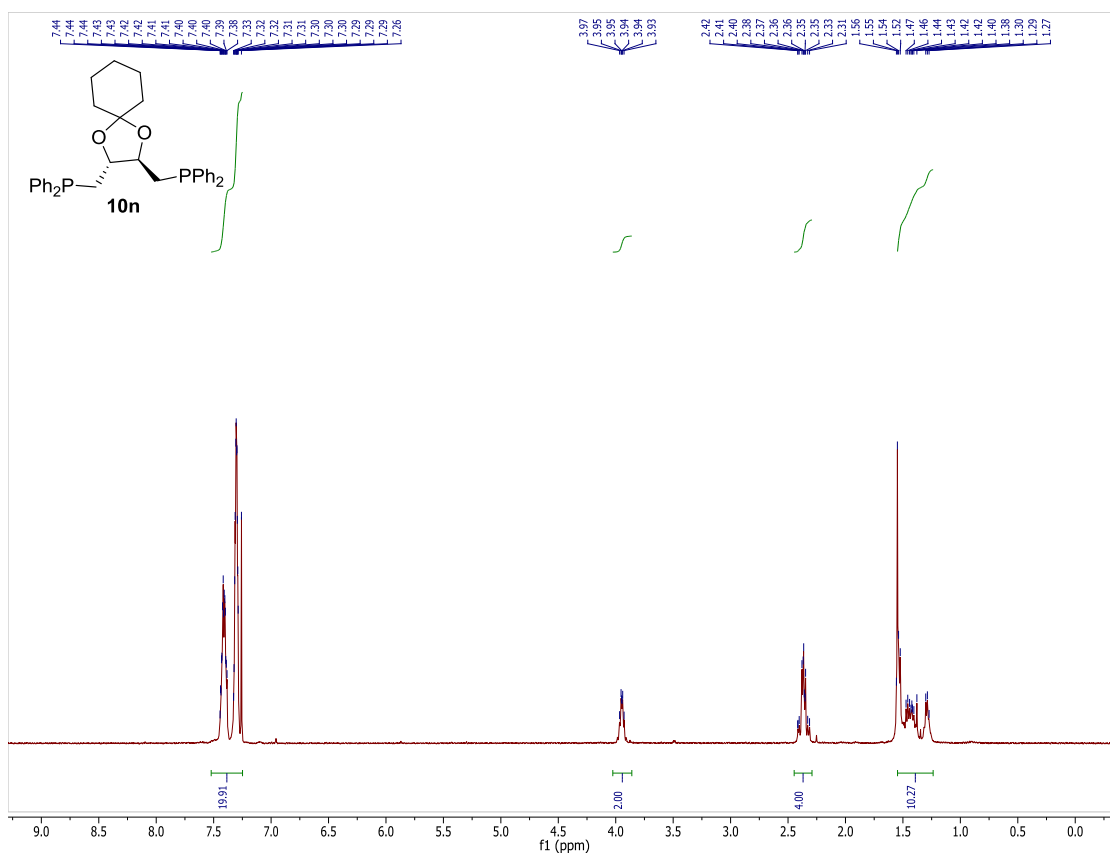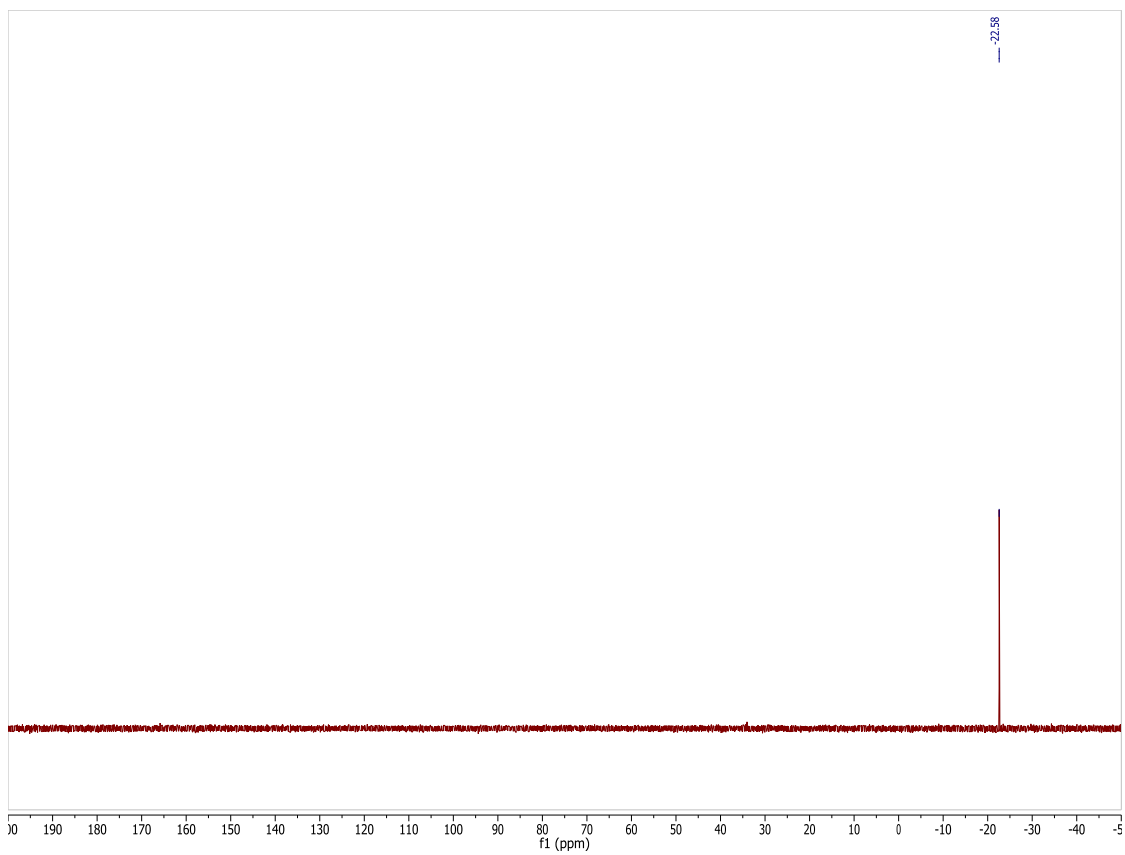

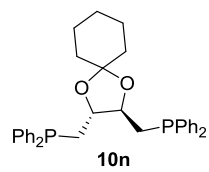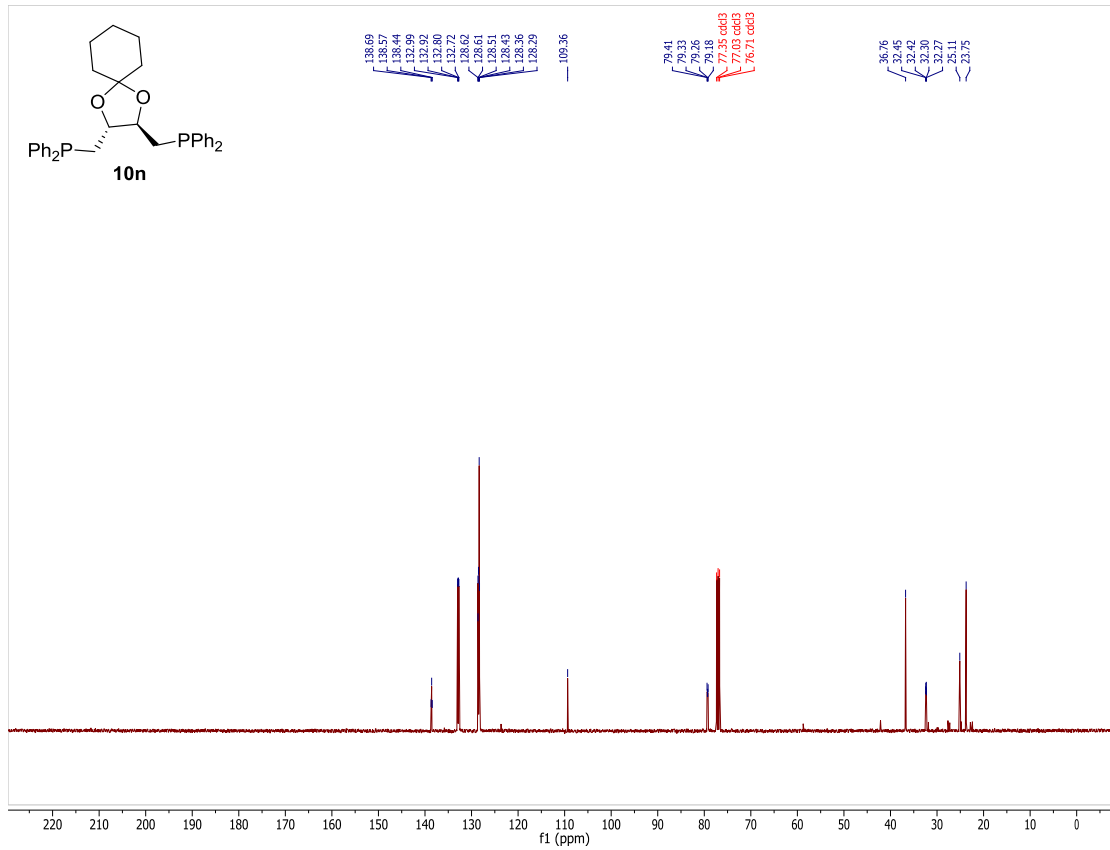



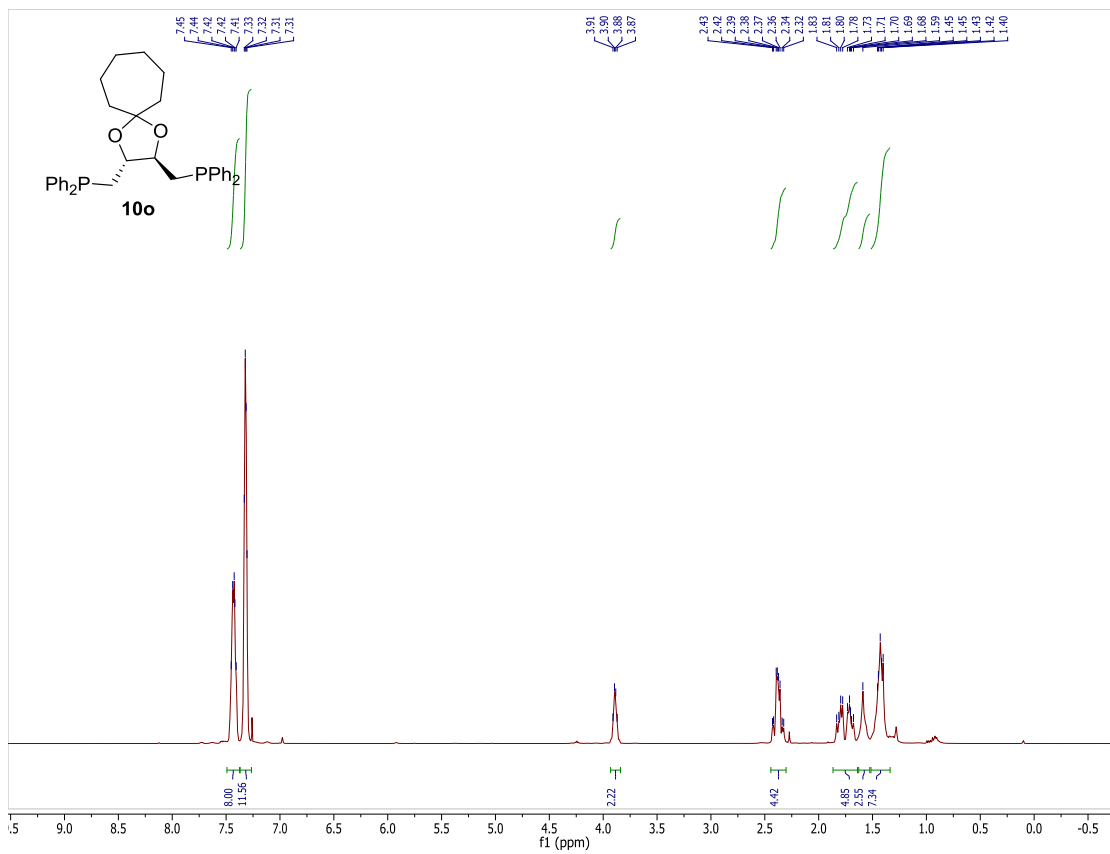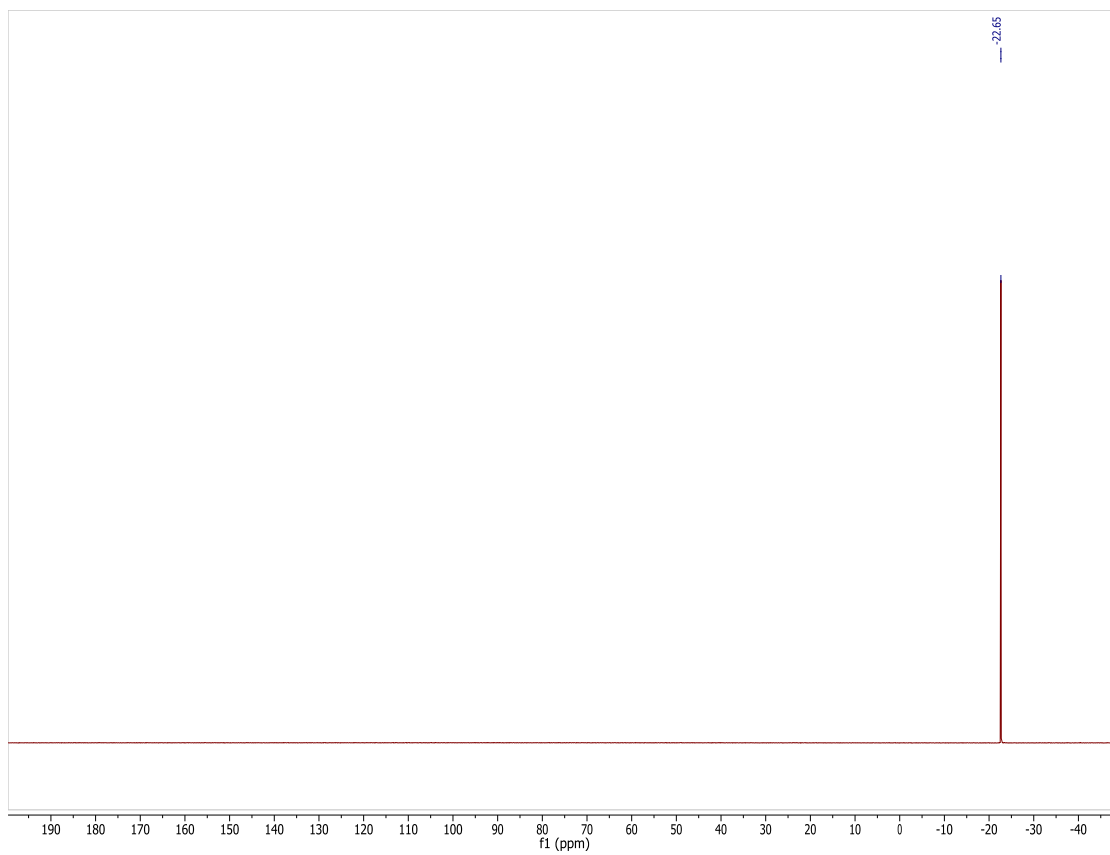

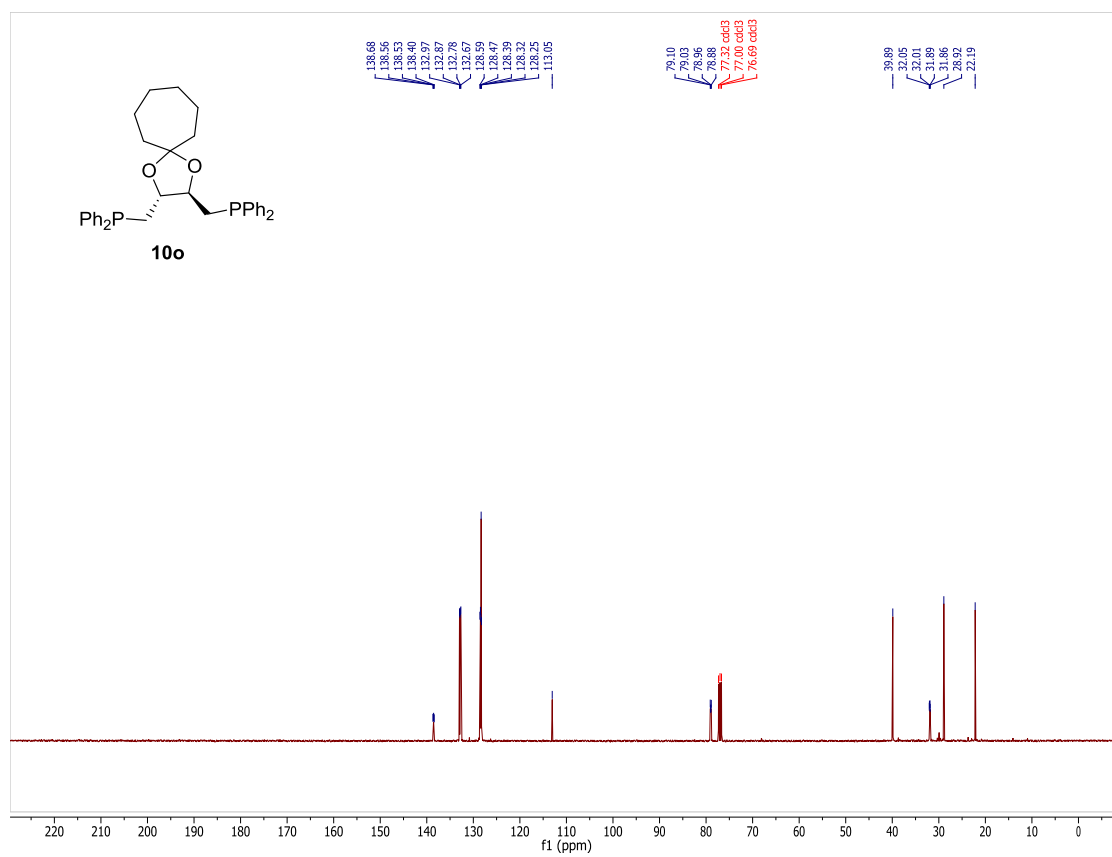

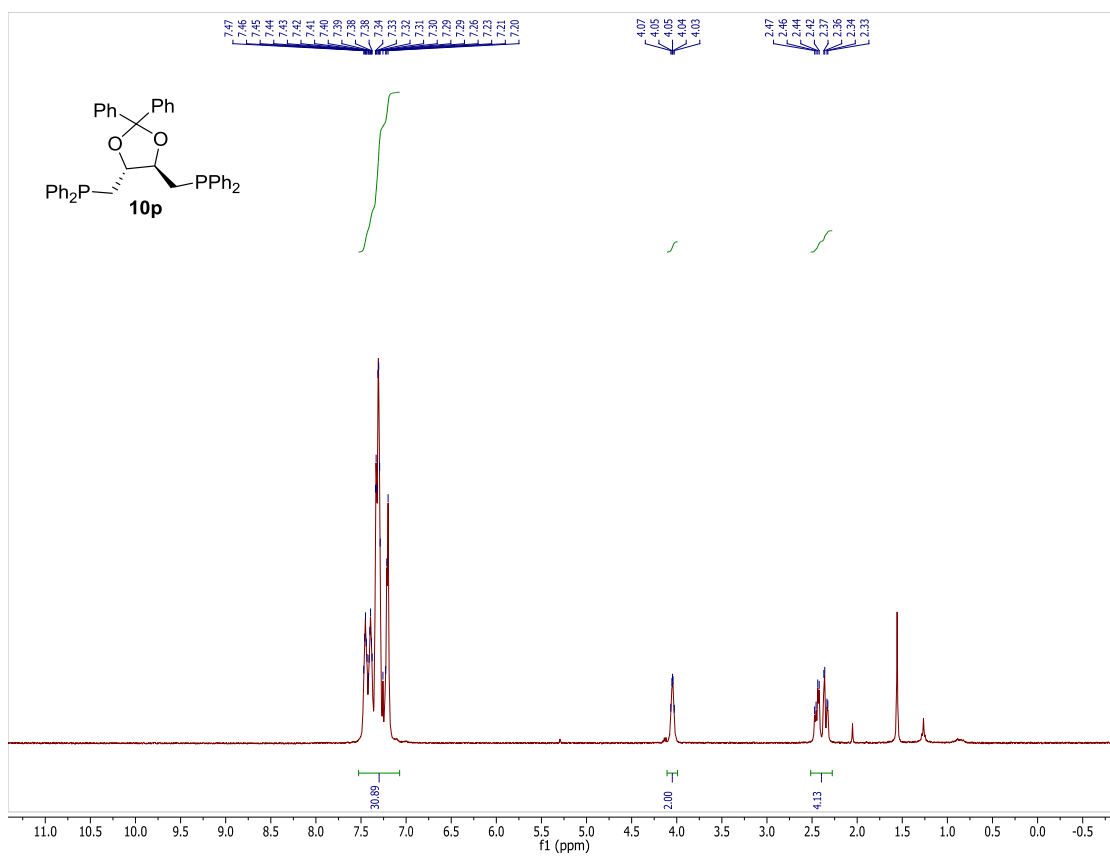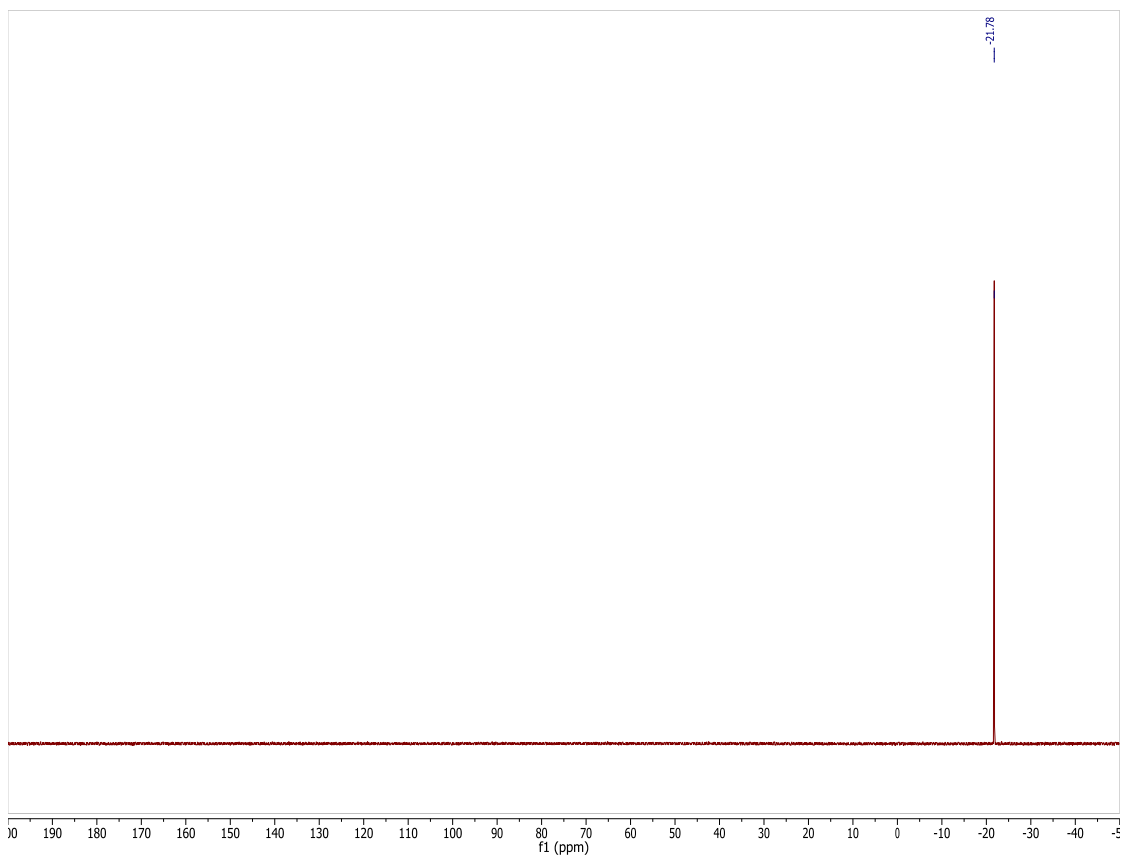

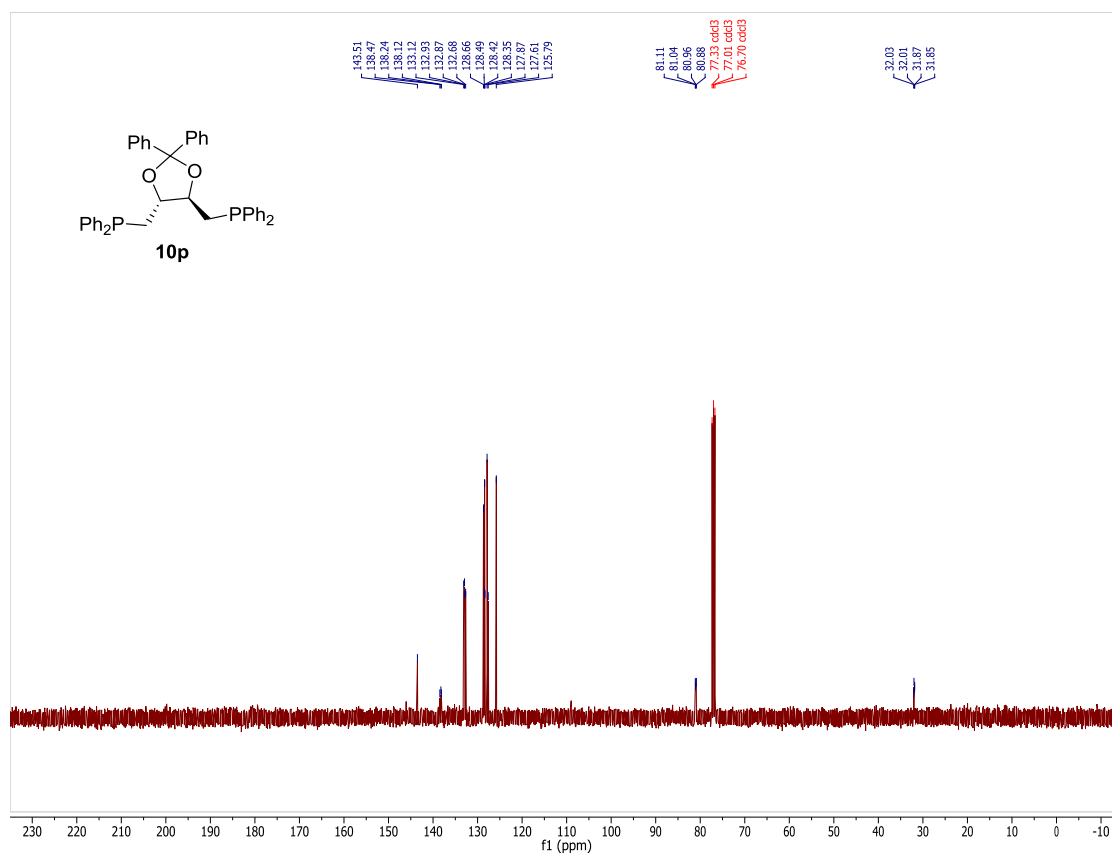

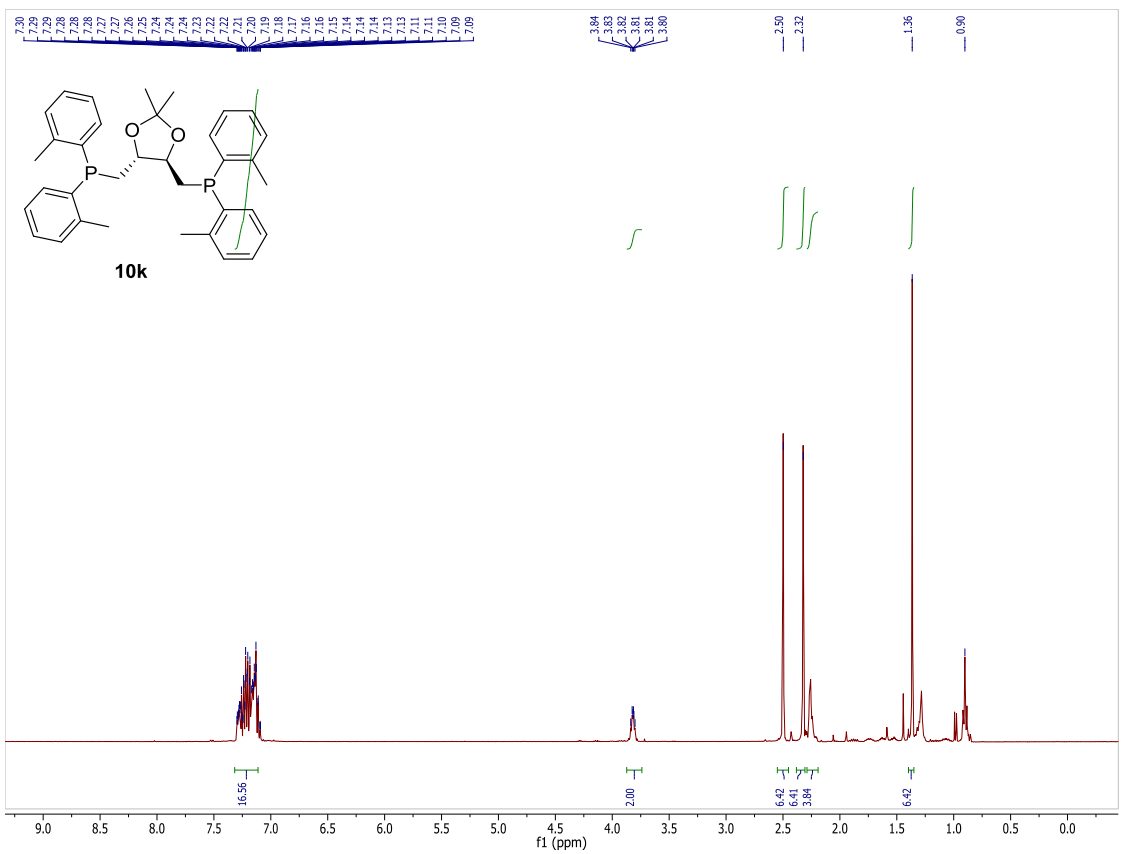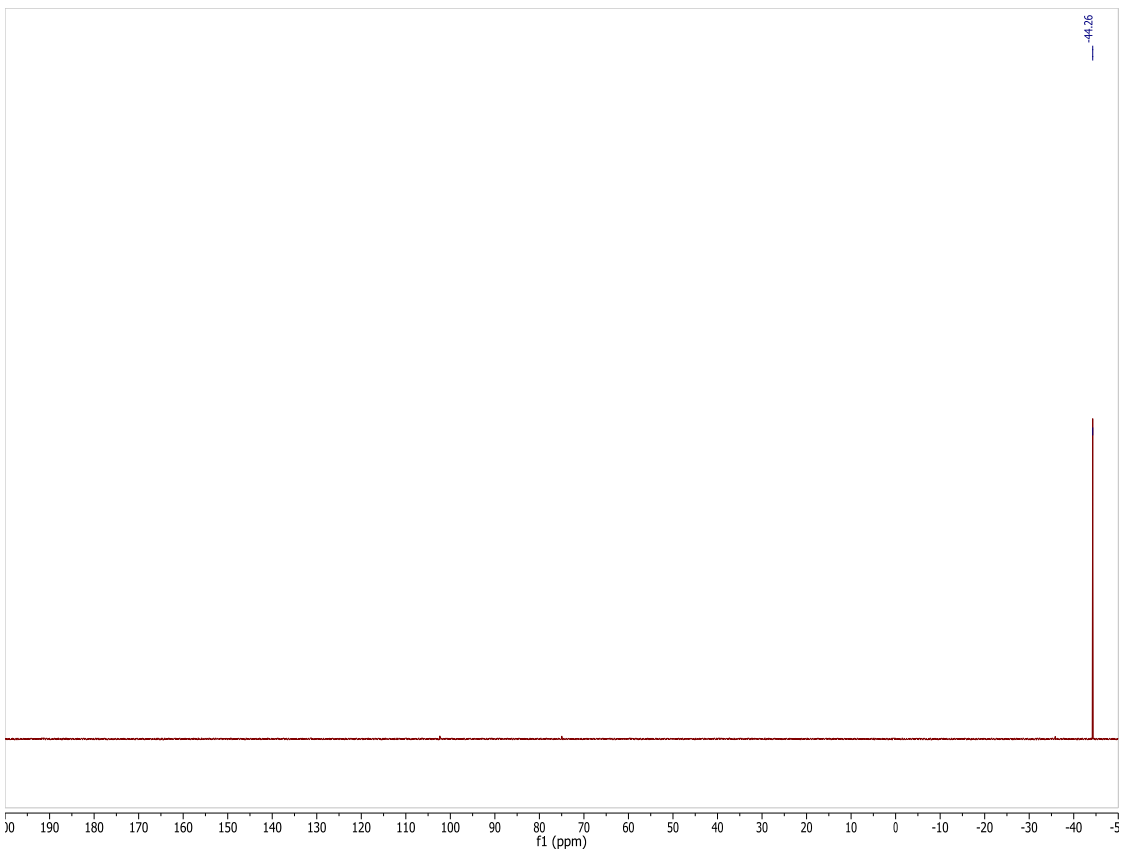

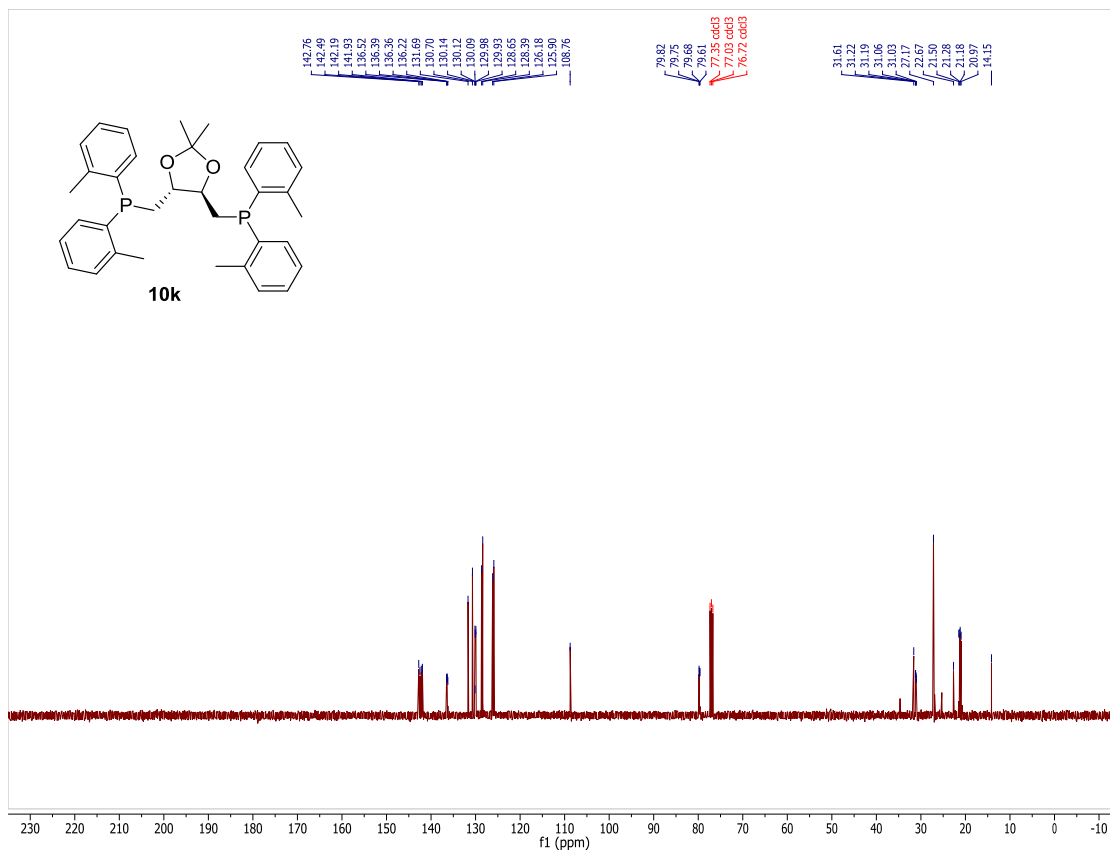

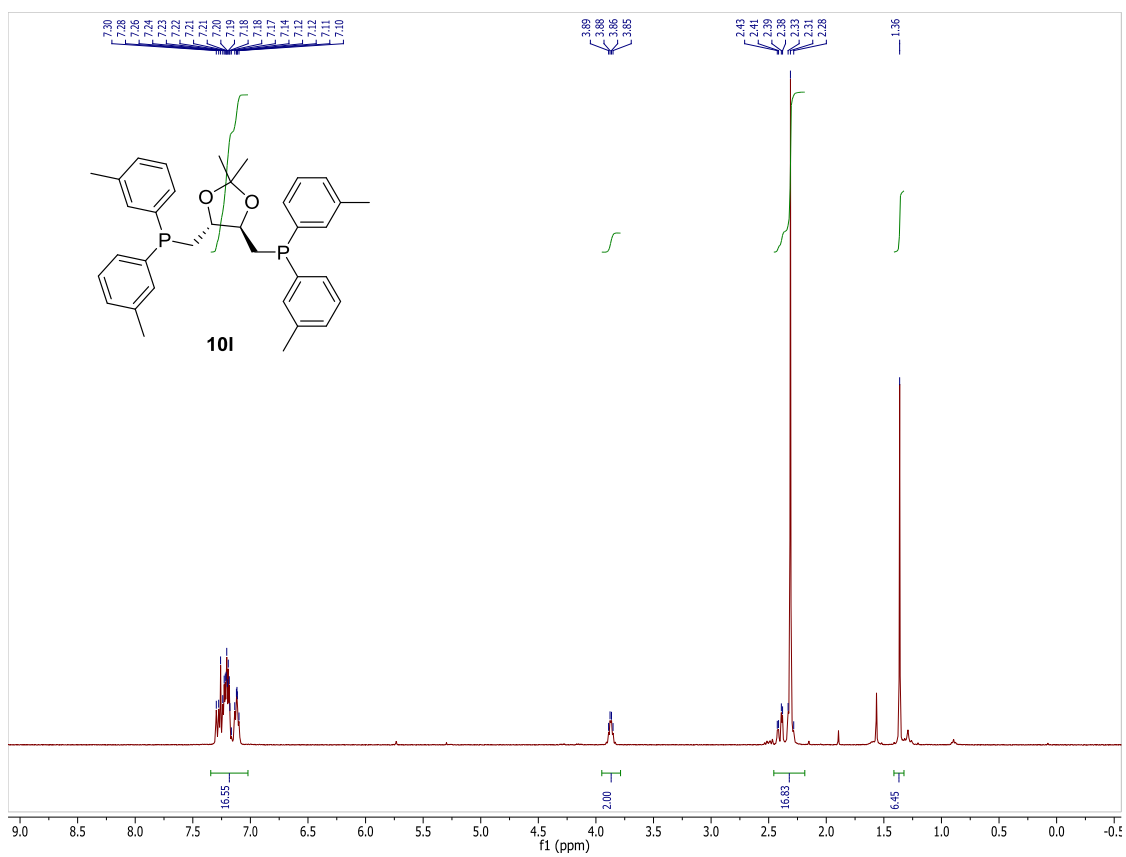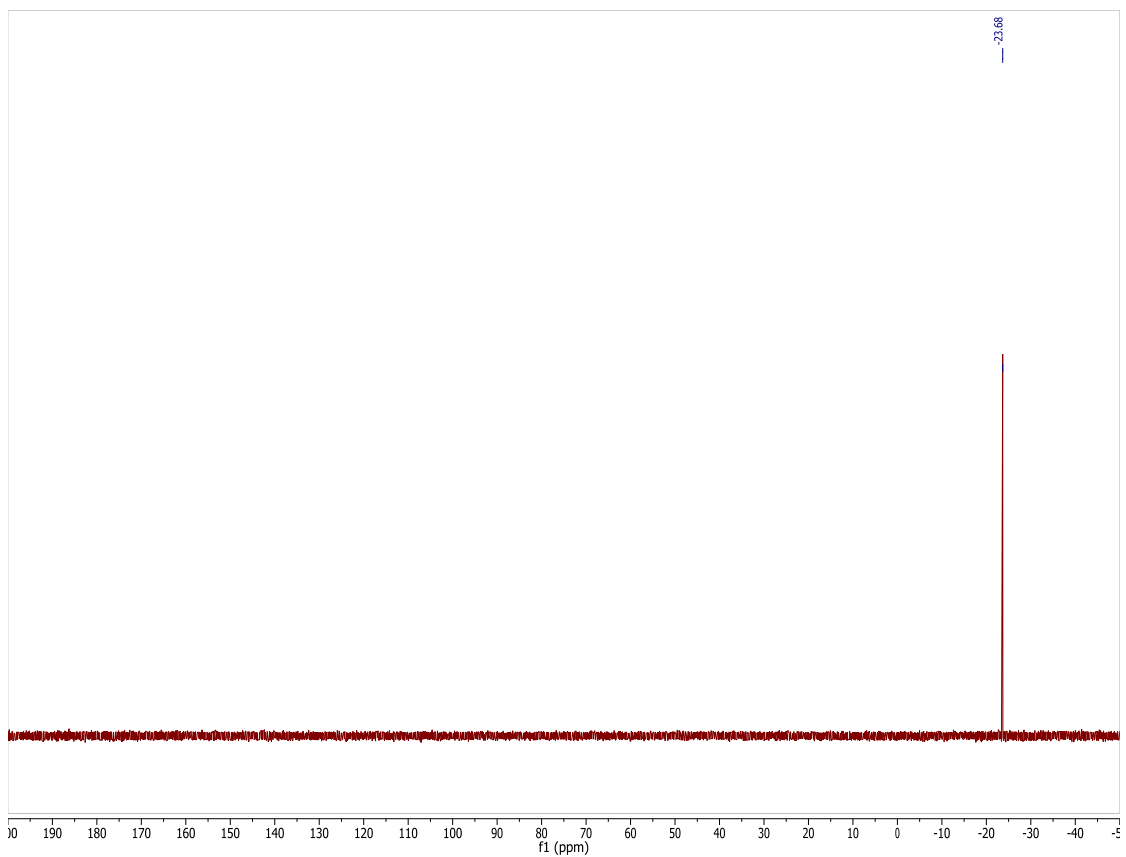

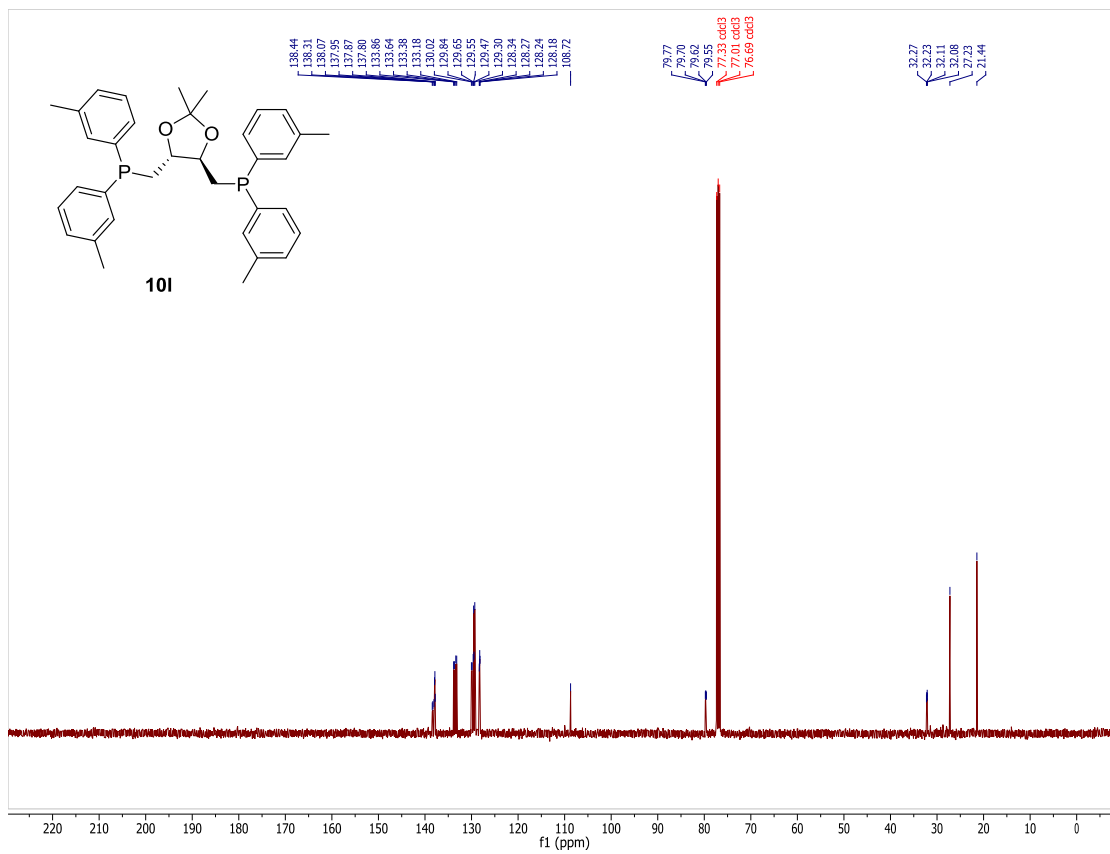



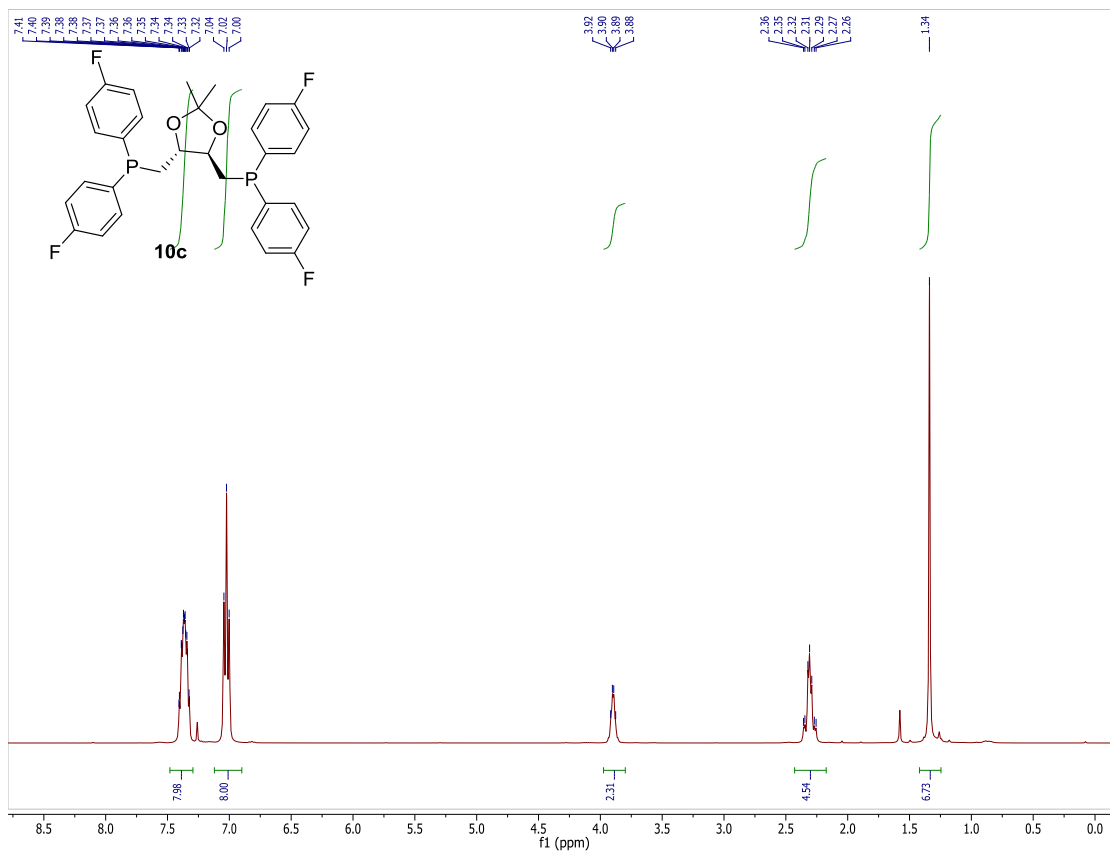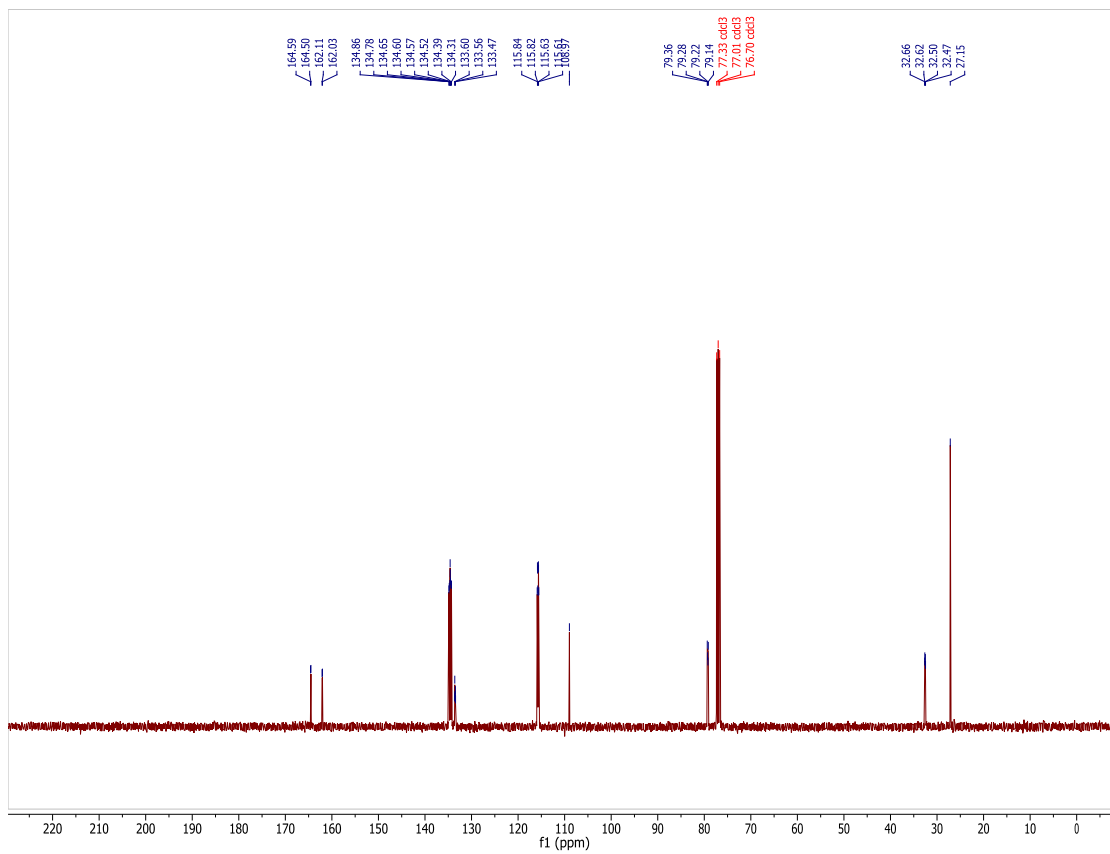

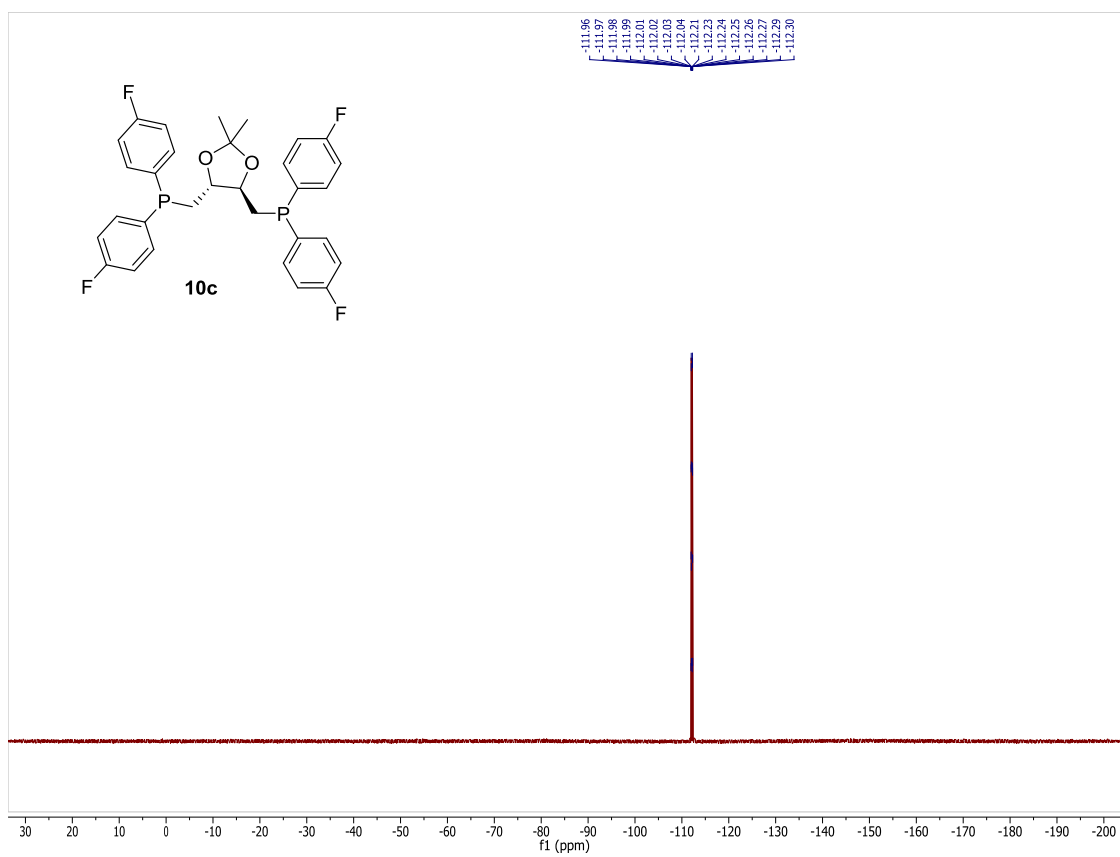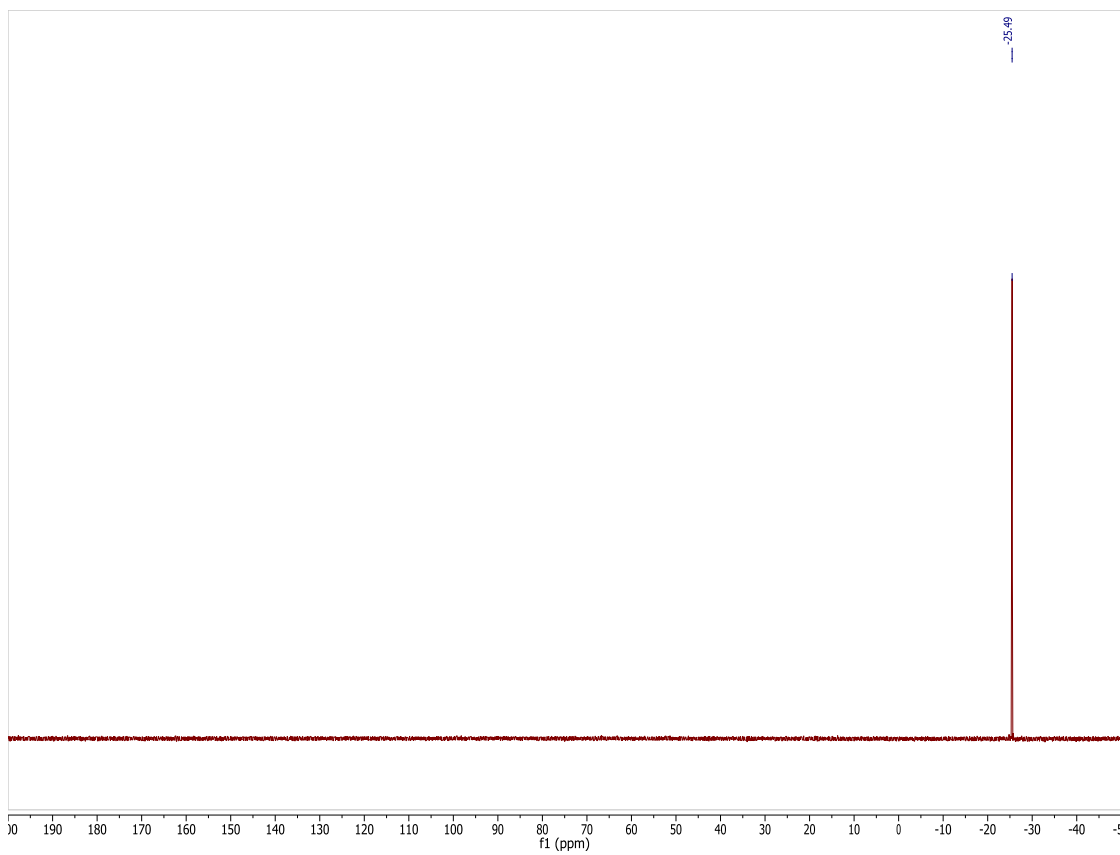

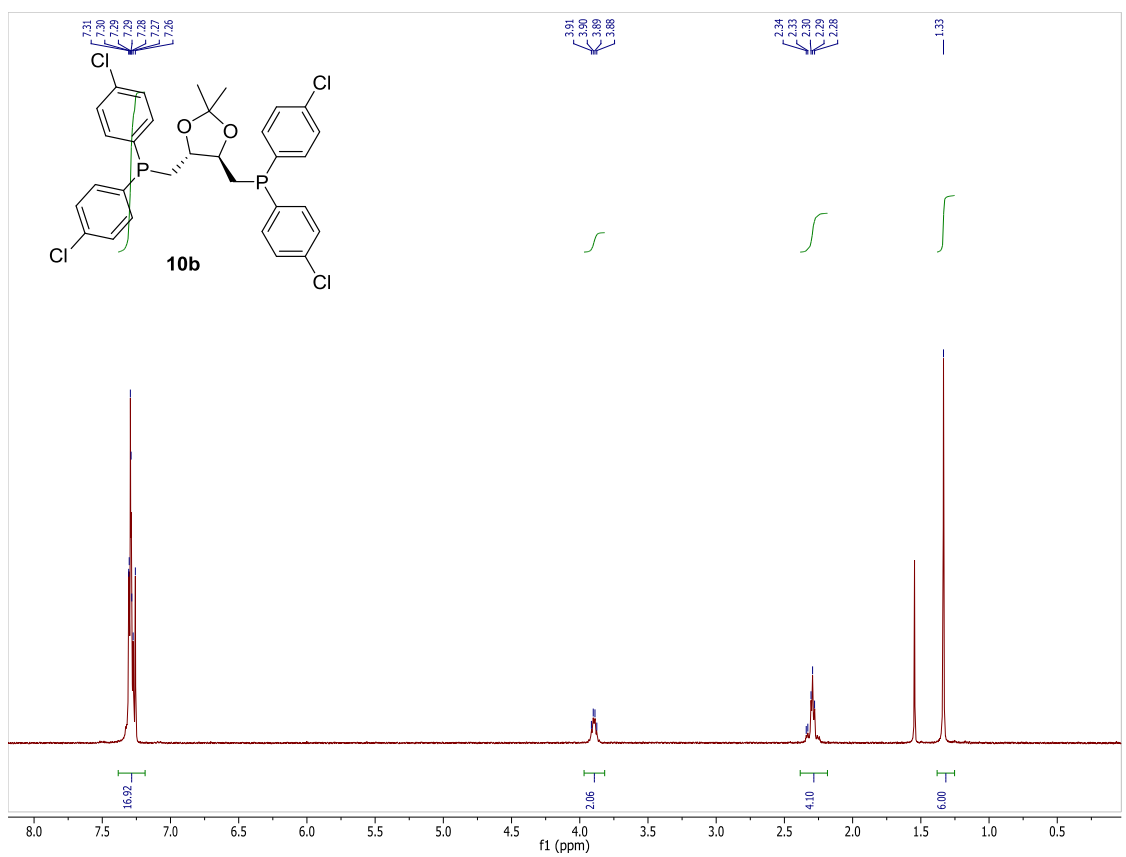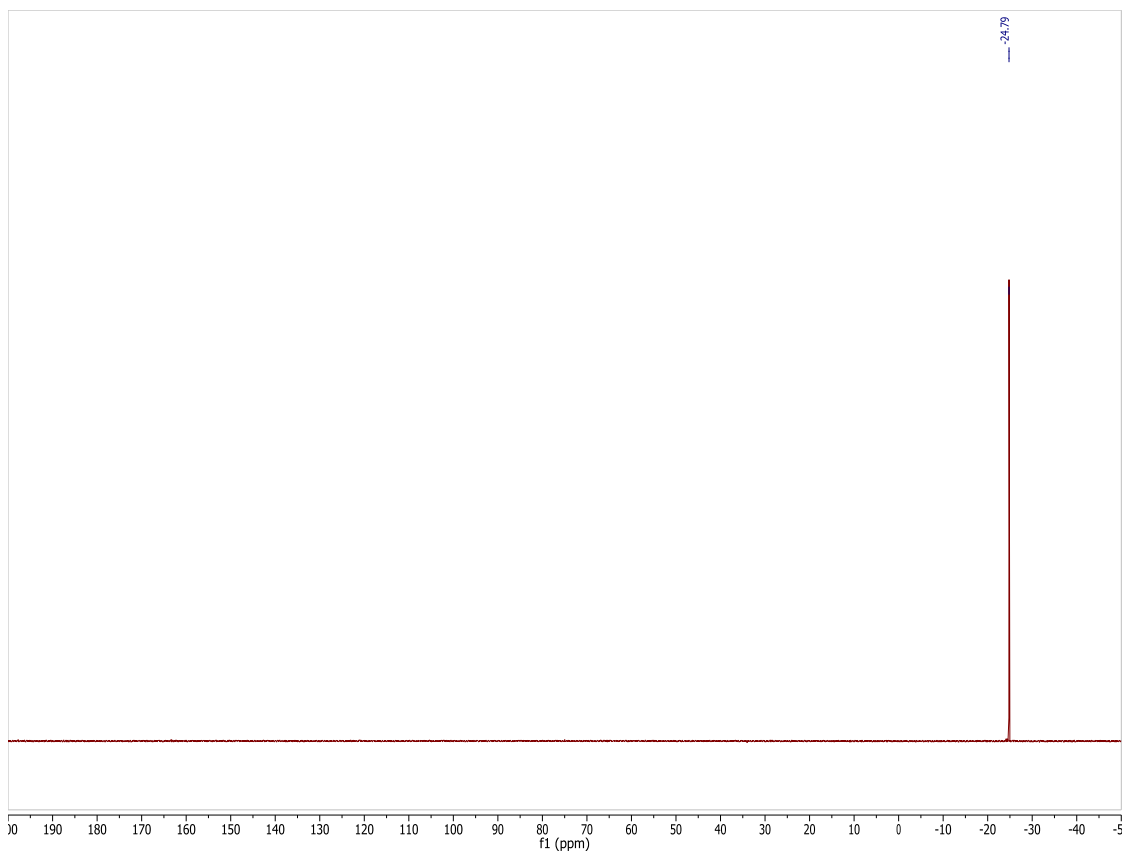

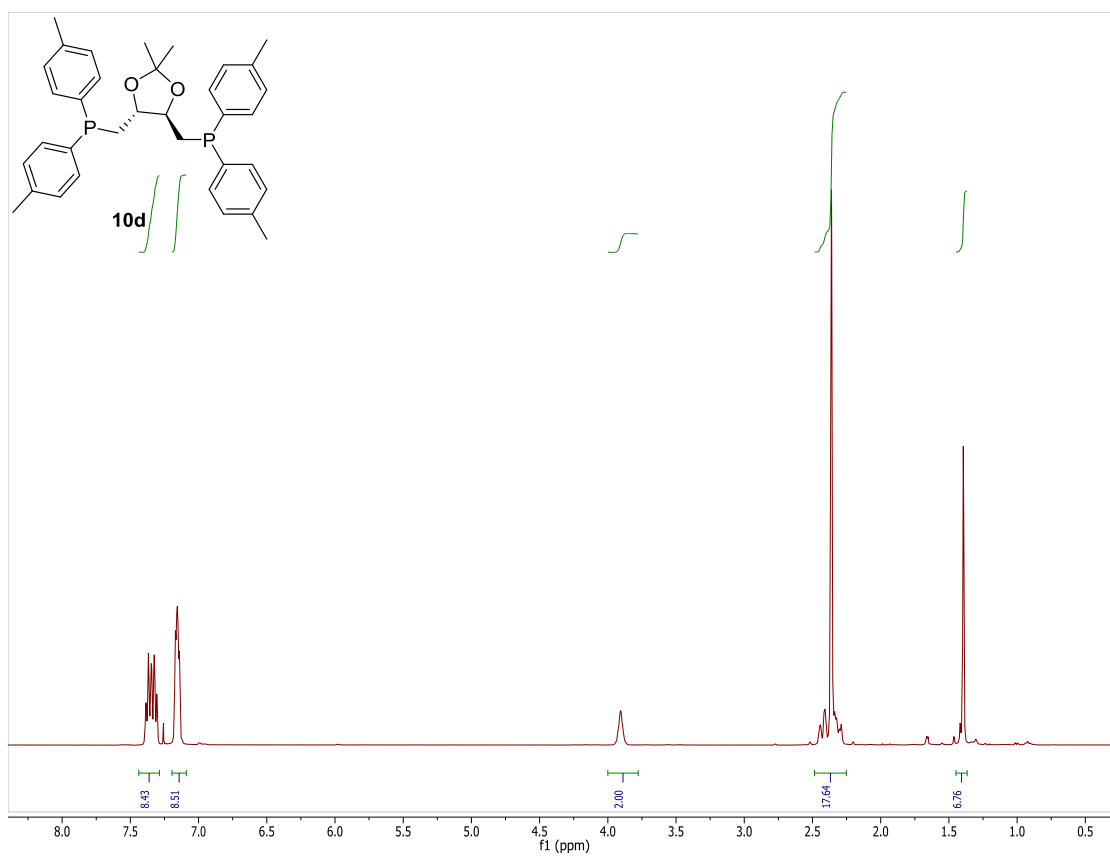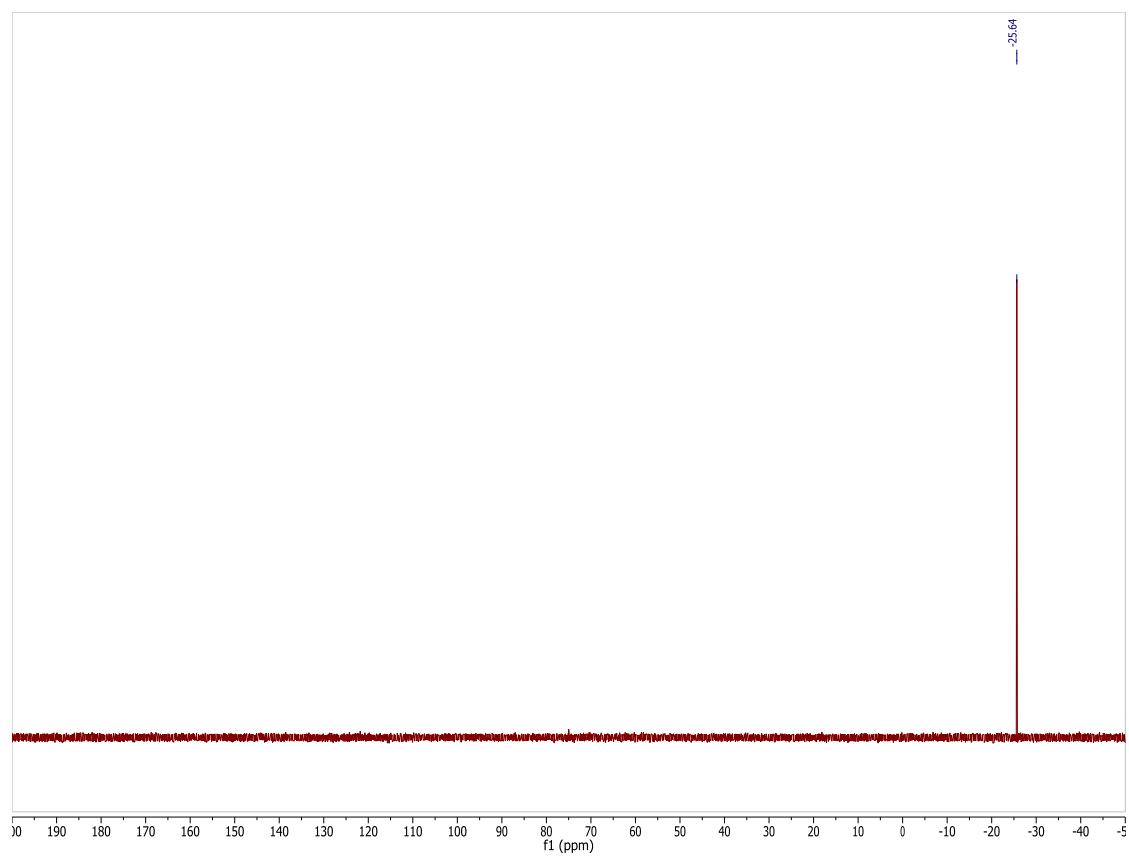



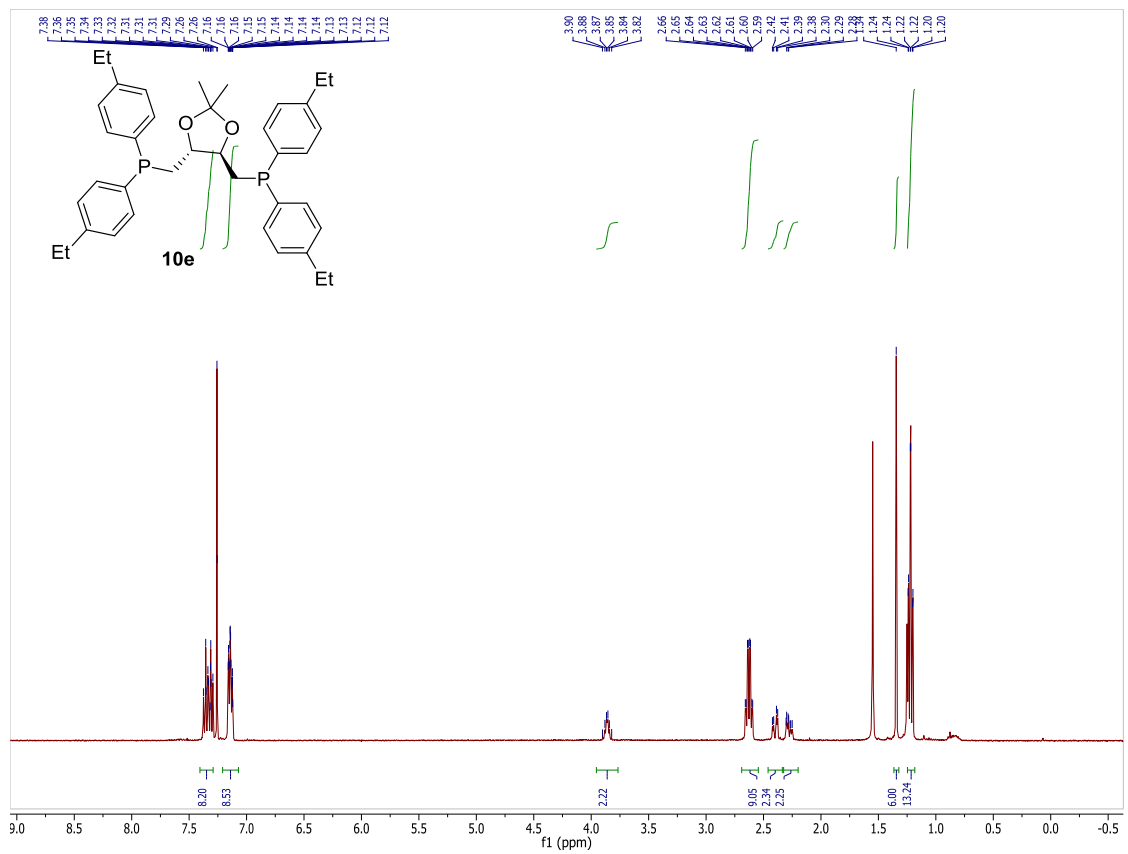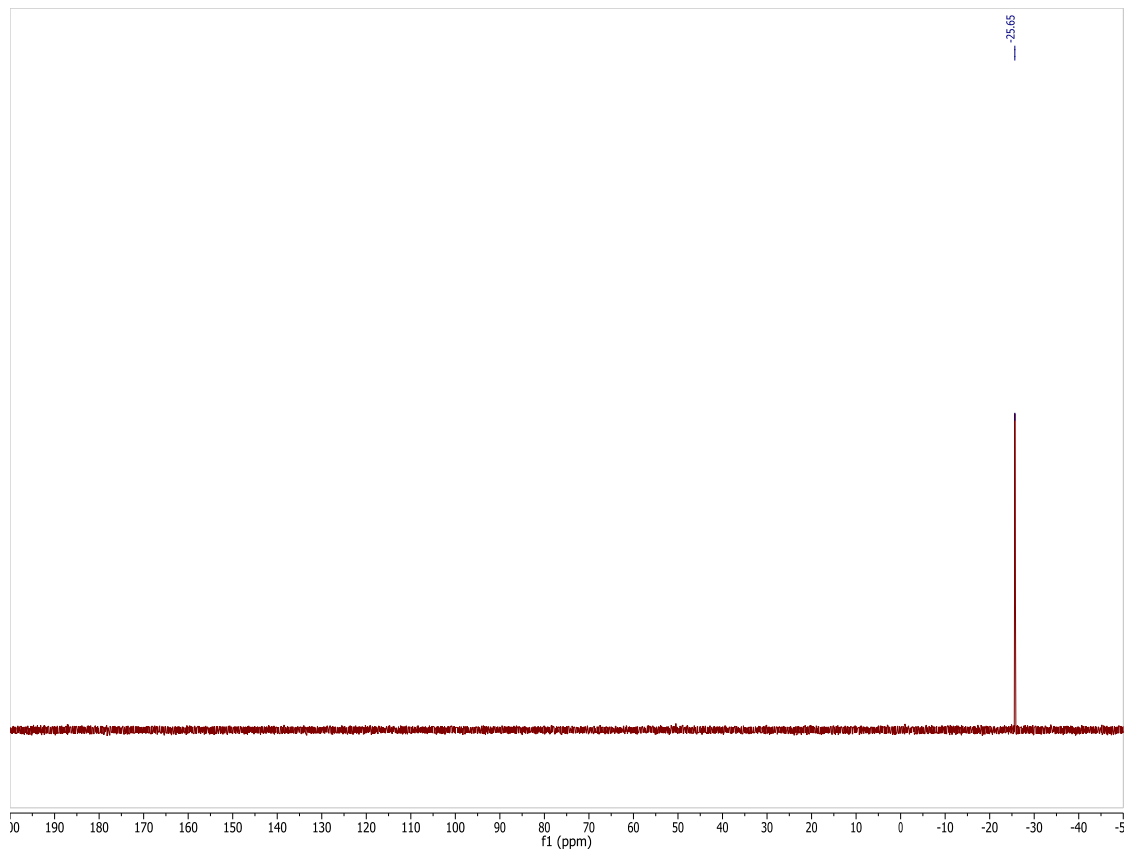

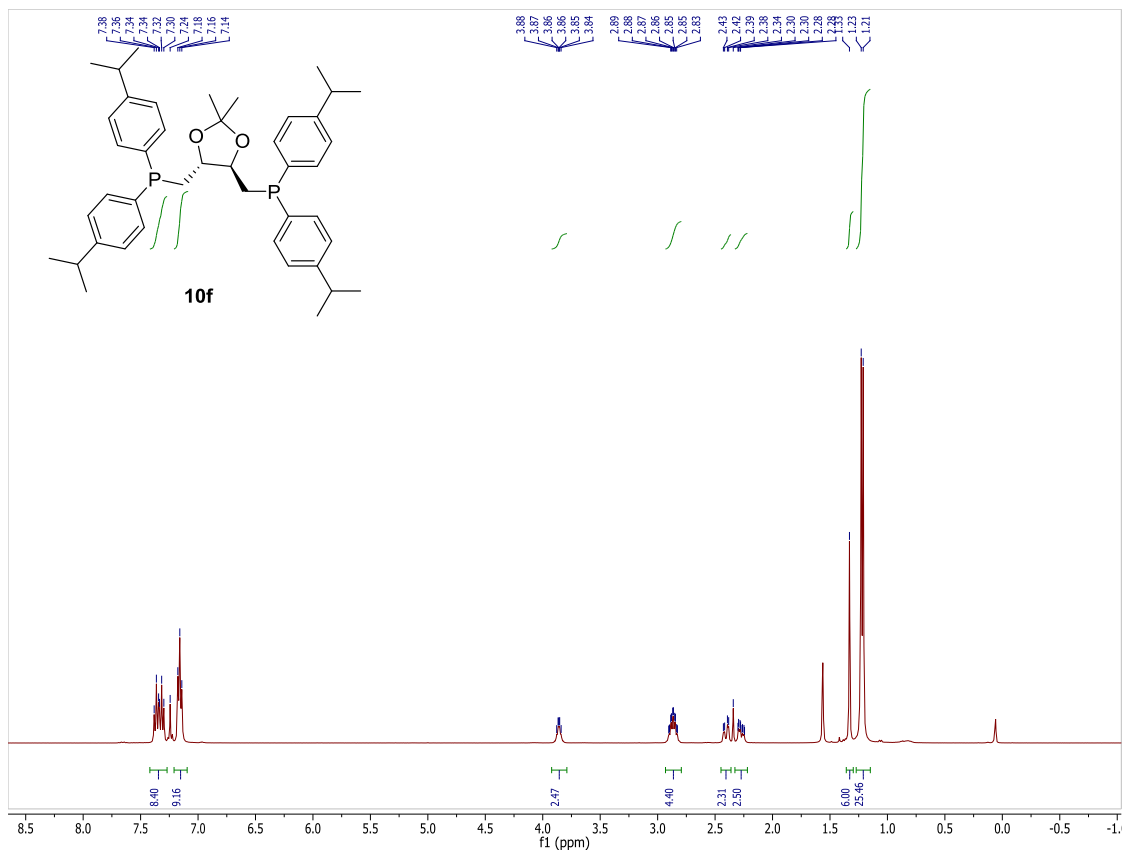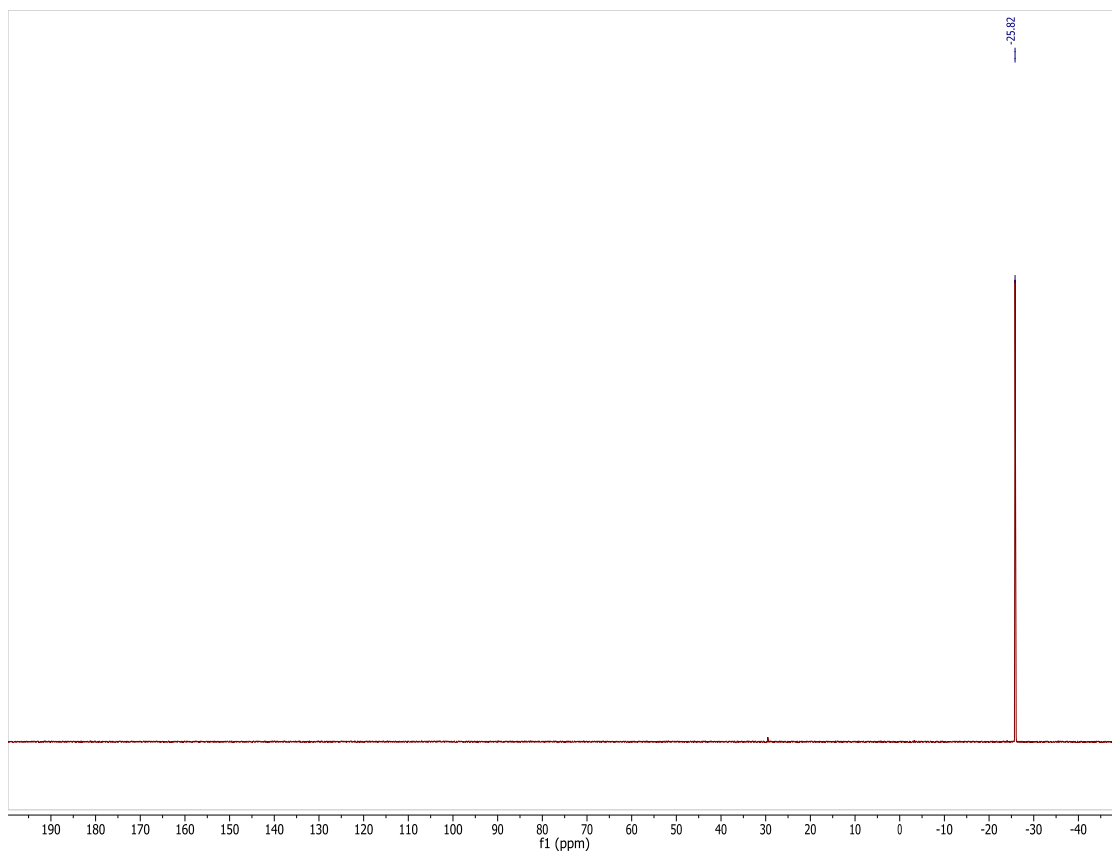

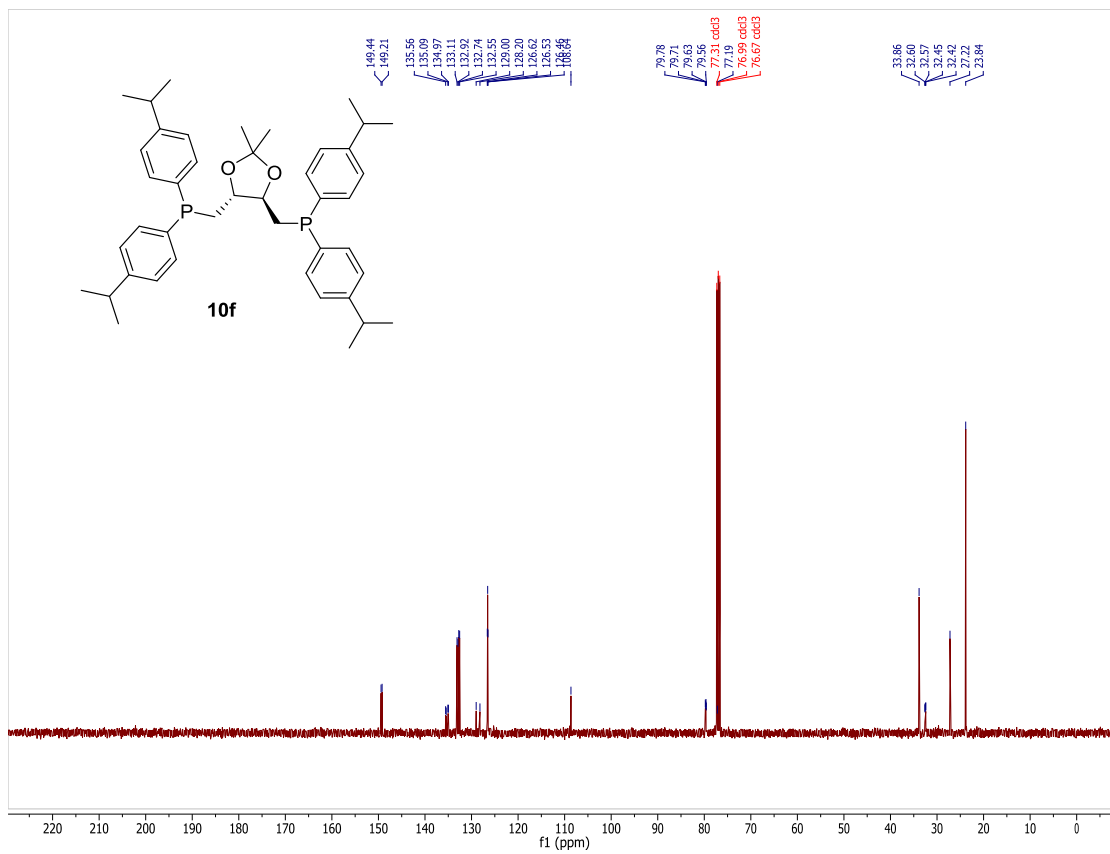



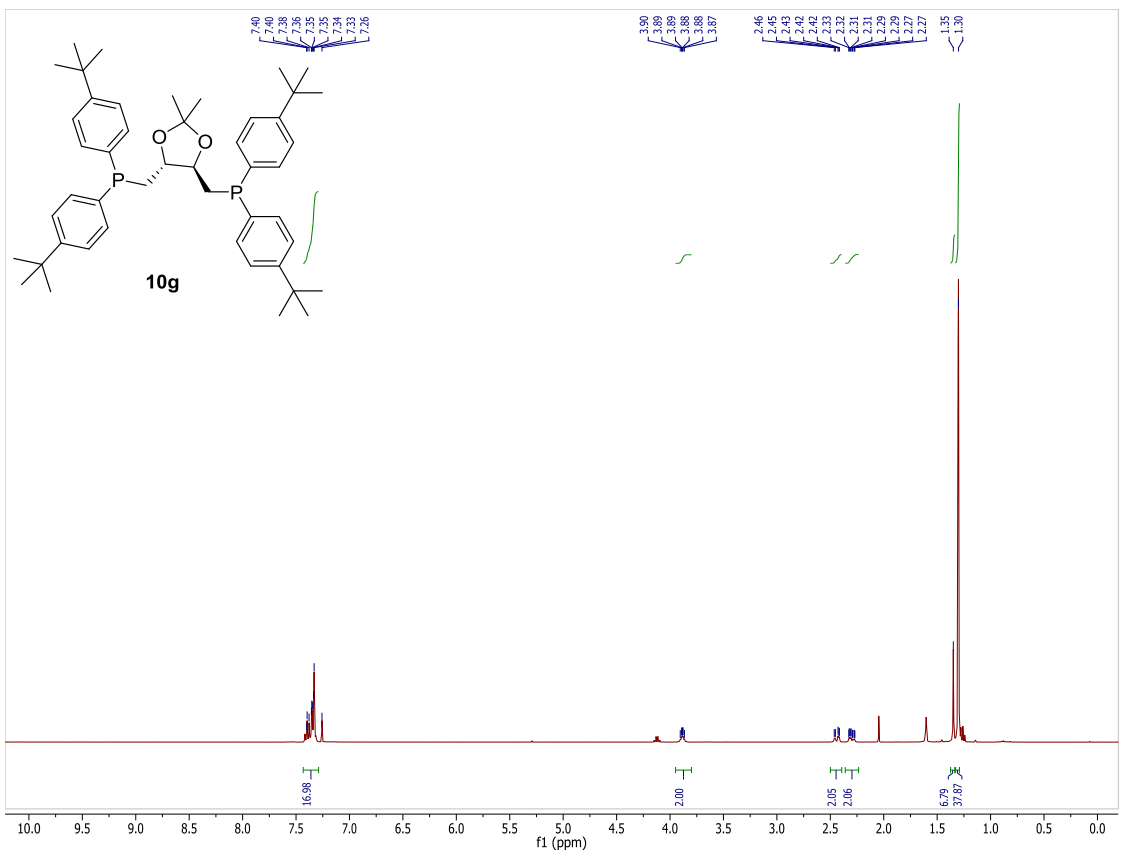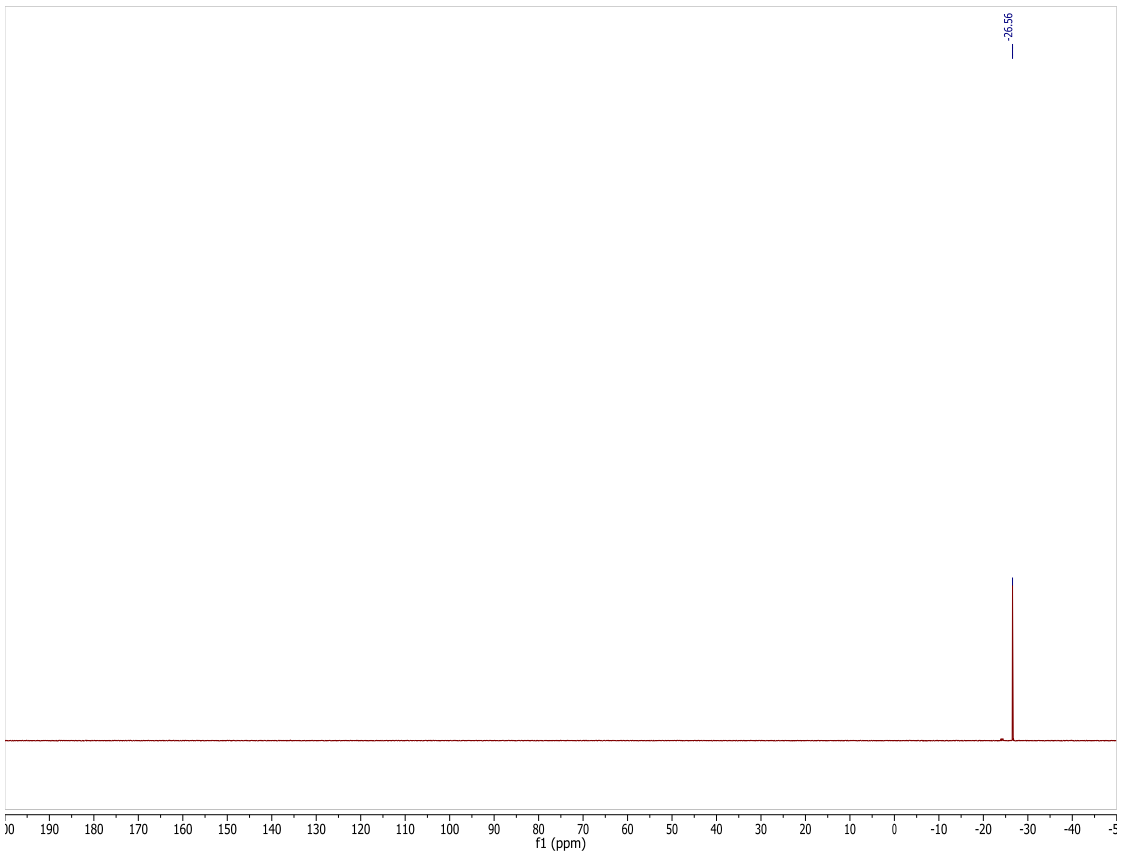

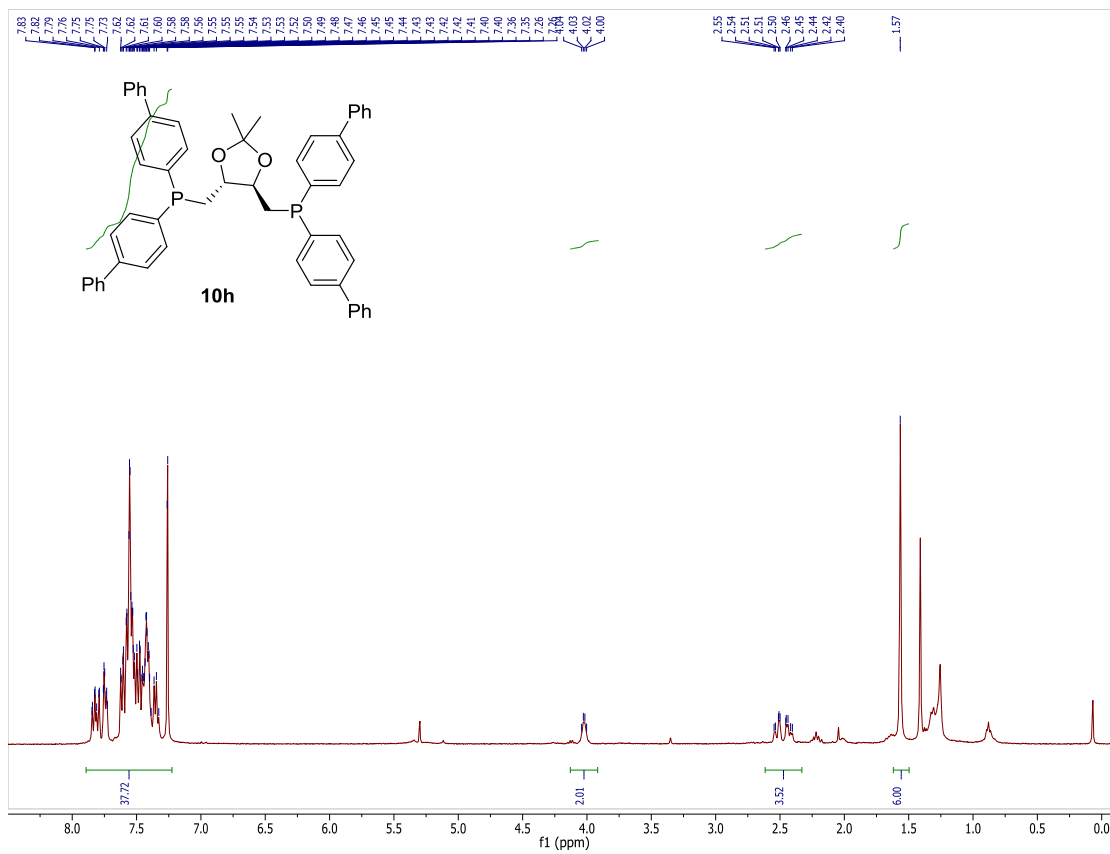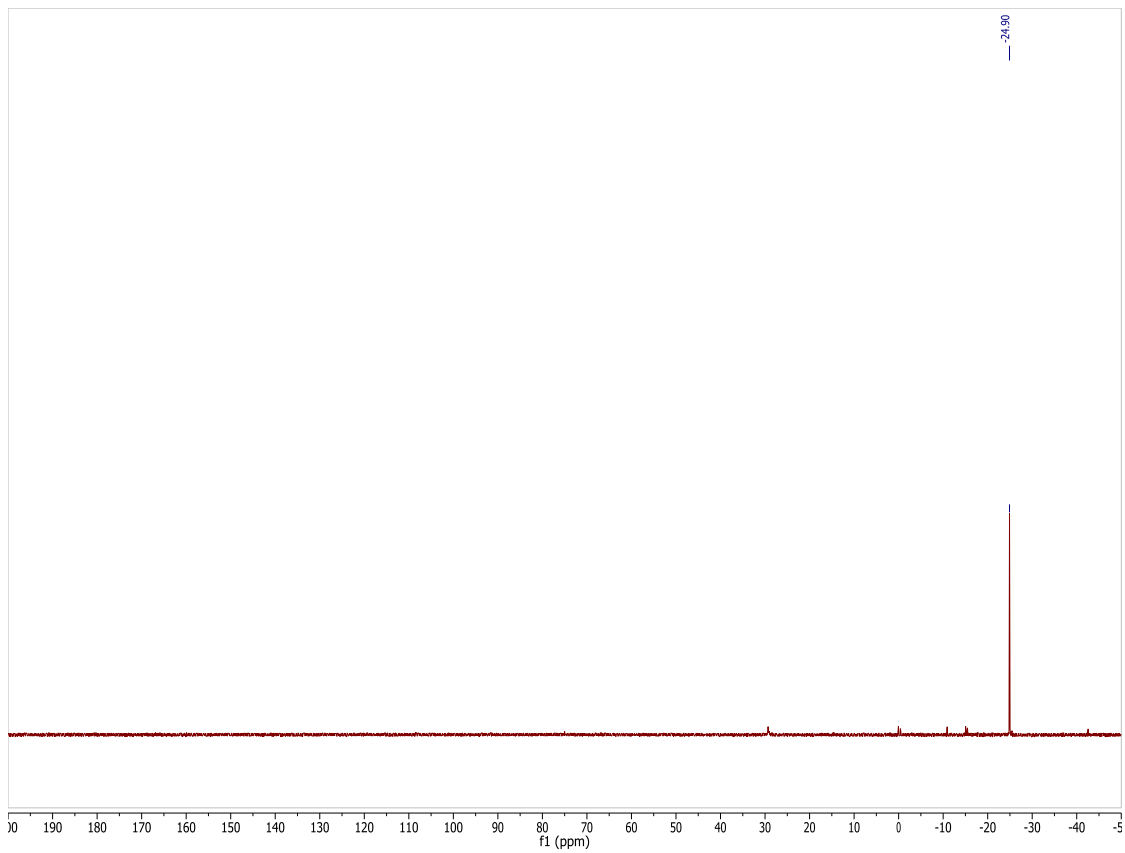

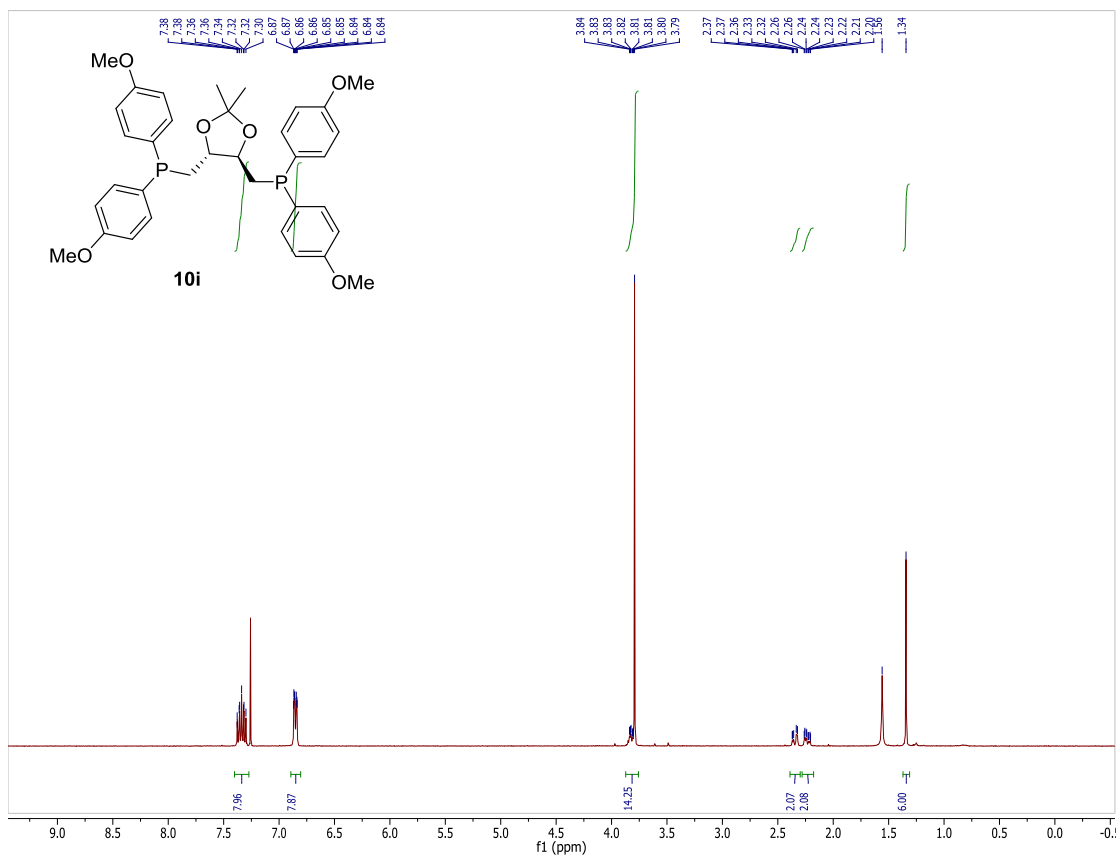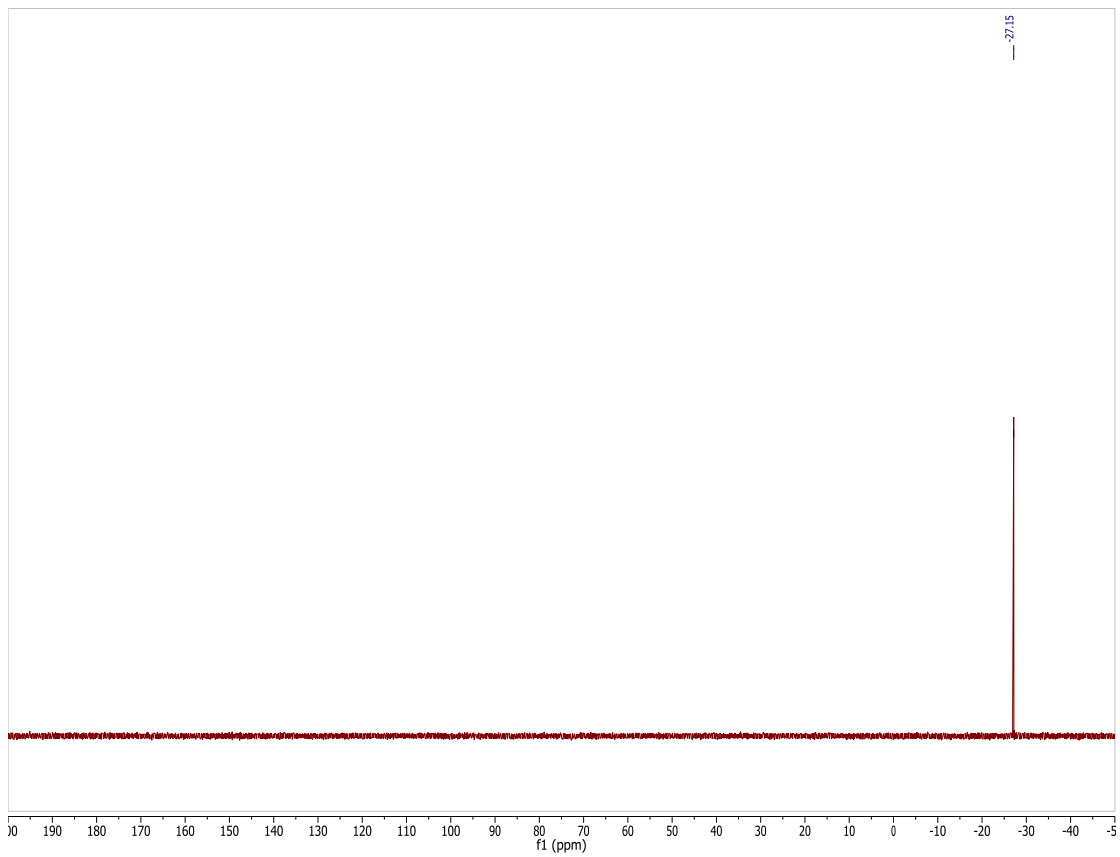

## References:

---

- 1 Kharasch, M. S.; Reinmuth, O; Urry, W. H. *J. Am. Chem. Soc.* **1947**, *69*, 1105-1110.
- 2 Huyser, E S.; Kim, L, *J. Org. Chem*, **1968**, *33*, 94-99.
- 3 Fialkov, Y. A.; Yagupol'skii, L. M. *Ukrainskii Khimicheskii Zhurnal*, **1966**, *32*, 996-1002.
- 4 Sawama, Y; Nakatani, R; Imanishi, T; Fujiwara, Y; Monguchi, Y; Sajiki, H. *RSC Adv.*, **2014**, *4*, 8657-8660.
- 5 Yagupol'skii, L. M.; Fialkov, Y. A. *Zhurnal Obshchei Khimii*, **1961**, *31*, 3586-3593.
- 6 Morken, P. A., Bachand, P. C., Swenson, D. C., Burton, D. J. *J. Am. Chem. Soc.* **1993**, *115*, 5430–5439.
- 7 Gao, F, Hoveyda, A. H. *J. Am. Chem. Soc.* **2010**, *132*, 10961-10963.
- 8 Koschker, P.; Kähny, M.; Breit, B. *J. Am. Chem. Soc.*, **2015**, *137*, 3131–3137.
- 9 Hobbs, C. F.; Knowles, W. S. *J. Org. Chem*, **1981**, *46*, 4422-4427.
- 10 Henri B. Kagan, *J. Am. Chem. Soc.*, **1972**, *94*, 6429–6433.
- 11 Dang T; Poulin, J. C.; Kagan, H. B. *J. Organomet. Chem.* **1975**, *91*, 105-115.
- 12 Spindler, F; Pugin, B; Jalett, H; Buser, H; Pittelkow, U; Blaser, H. *Chemical Industries*, **1996**, *68*, 153-166.
- 13 Werz, U; Brune, H. A. *J. Organomet. Chem.* **1989**, *363*, 377-385.
- 14 Frisch, M. J.; Trucks, G. W.; Schlegel, H. B.; Scuseria, G. E.; Robb, M. A.; Cheeseman, J. R.; Scalmani, G.; Barone, V.; Mennucci, B.; Petersson, G. A.; Nakatsuji, H.; Caricato, M.; Li, X.; Hratchian, H. P.; Izmaylov, A. F.; Bloino, J.; Zheng, G.; Sonnenberg, J. L.; Hada, M.; Ehara, M.; Toyota, K.; Fukuda, R.; Hasegawa, J.; Ishida, M.; Nakajima, T.; Honda, Y.; Kitao, O.; Nakai, H.; Vreven, T.; Montgomery, J. A., Jr.; Peralta, J. E.; Ogliaro, F.; Bearpark, M.; Heyd, J. J.; Brothers, E.; Kudin, K. N.; Staroverov, V. N.; Kobayashi, R.; Normand, J.; Raghavachari, K.; Rendell, A.; Burant, J. C.; Iyengar, S. S.; Tomasi, J.; Cossi, M.; Rega, N.; Millam, N. J.; Klene, M.; Knox, J. E.; Cross, J. B.; Bakken, V.; Adamo, C.; Jaramillo, J.; Gomperts, R.; Stratmann, R. E.; Yazyev, O.; Austin, A. J.; Cammi, R.; Pomelli, C.; Ochterski, J. W.; Martin, R. L.; Morokuma, K.; Zakrzewski, V. G.; Voth, G. A.; Salvador, P.; Dannenberg, J. J.; Dapprich, S.; Daniels, A. D.; Farkas, O.; Foresman, J. B.; Ortiz, J. V.; Cioslowski, J.; Fox, D. J. *Gaussian 09, Revision D.01*; Gaussian, Inc.: Wallingford, CT, 2009.
15. Zhao, Y. ; Truhlar, D. G., *J. Chem. Phys.*, **2006**, *125*, 1-18.

---

16. a) Lee, C.; Yang, W.; Parr, R. G. *Phys. Rev. B* **1988**, *37*, 785; (b) Bechke, A. D. *Phys. Rev. A* **1988**, *38*, 3098; c) Miehlich, B.; Savin, A.; Stoll, H.; Preuss, H. *Chem. Phys. Lett.* **1989**, *157*, 200; d) Becke, A. D. *J. Chem. Phys.* **1993**, *98*, 5648.

17. Marenich, A. V.; Cramer, C. J.; Truhlar, D. G. *J. Phys. Chem. B* **2009**, *113*, 6378–6396.
